# Supplementary material for: Metal free regio – and stereoselective semireduction of CF3-substituted N-allenamides
Source: Royal Society of Chemistry journal article supplement (doi:10.1039/d3ob01859h), 2023-12-30
Supplement: d3ob01859h1.pdf [file d3ob01859h1.pdf]

*Supporting Information*

**Metal Free Regio – and Stereoselective  
Semireduction of CF<sub>3</sub>-Substituted *N*-  
Allenamides**

Clément Gommenginger<sup>a‡</sup>, Maxime Hourtoule<sup>a‡</sup>, Marco Menghini<sup>a</sup> and Laurence Miesch<sup>a\*</sup>

<sup>a</sup> *Équipe de Synthèse Organique et Phytochimie, Institut de Chimie,  
Université de Strasbourg, CNRS-UdS UMR 7177,  
4, rue Blaise Pascal CS 90032, 67081 Strasbourg, France*

Corresponding author: [lmiesch@unistra.fr](mailto:lmiesch@unistra.fr)

**Contents**

|                                                                                                   |     |
|---------------------------------------------------------------------------------------------------|-----|
| Contents.....                                                                                     | 1   |
| General remarks.....                                                                              | 2   |
| Experimental procedure .....                                                                      | 3   |
| General procedure for preparation of Ynamides .....                                               | 3   |
| General procedure for preparation of <i>N</i> -allenamides.....                                   | 3   |
| Trifluorinated <i>N</i> -allenamides <b>1</b> .....                                               | 3   |
| Disubstitued <i>N</i> -allenamide <b>1n</b> .....                                                 | 4   |
| General procedure for the 1,2-semireduction of <i>N</i> -allenamides <b>1</b> .....               | 4   |
| General procedure for the isomerization of allylamide <b>2</b> to tertiary enamide <b>3</b> ..... | 5   |
| Procedure for the preparation of <b>4<sup>3</sup></b> .....                                       | 5   |
| Procedure for the preparation of <b>5</b> .....                                                   | 5   |
| Procedure for the preparation of <b>6</b> .....                                                   | 6   |
| Procedure for the preparation of <b>7</b> .....                                                   | 6   |
| Characterization data .....                                                                       | 6   |
| <i>N</i> -allenamides <b>1a-v</b> .....                                                           | 6   |
| Allylamides <b>2a-v</b> .....                                                                     | 14  |
| Enamides <b>3a-v</b> .....                                                                        | 24  |
| Terminal <i>N</i> -allenamide <b>4</b> .....                                                      | 34  |
| Various syntheses <b>5-7</b> .....                                                                | 34  |
| NMR Spectra.....                                                                                  | 35  |
| X-Ray Crystallography data.....                                                                   | 117 |
| Crystal structure Report for <b>3b</b> (CCDC 2301994).....                                        | 118 |

## General remarks

All reactions were carried out under an inert atmosphere of argon in dried glassware, unless otherwise noted. Conventional solvents (THF, Et<sub>2</sub>O, CH<sub>2</sub>Cl<sub>2</sub>) are stored on molecular sieves and sampled under argon. Toluene, CH<sub>3</sub>CN, acetic acid, were used as received.

NMR Spectra (<sup>1</sup>H, <sup>13</sup>C, <sup>19</sup>F) were performed at 298 K. <sup>1</sup>H (500 MHz or 300 MHz) and <sup>13</sup>C (126 MHz) NMR chemical shifts are reported relative to residual protiated solvent. <sup>19</sup>F (281 MHz or 471 MHz) NMR chemical shifts are reported without any calibration. Data are presented as follows: chemical shift (ppm), multiplicity (s = singlet, d = doublet, t = triplet, q = quartet, hept = heptet, m = multiplet, br = broad), coupling constant *J* (Hz) and integration.

HRMS data were recorded on a microTOF spectrometer equipped with an orthogonal electrospray (ESI) interface.

Thin layer chromatography was performed using Merck TLC silica gel 60 F<sub>254</sub> aluminum sheets using petroleum ether/EtOAc as eluant and visualized using permanganate stain, ninhydrin stain, vanillin stain and/or UV light. Merck Geduran<sup>®</sup> 40-63 μm silica gel was used for column chromatography.

Biotage<sup>®</sup> Isolera<sup>™</sup> One system was used for *flash* chromatography. The wavelength of the UV-detector was calibrated at 254 and 365 nm.

Infrared spectra were reported in frequency of absorption using Alpha Bruker Optics spectrometer.

Melting points were recorded with a SMP3 Stuart Scientific microscope in open capillary tubes and are uncorrected

## Experimental procedure

### General procedure for preparation of Ynamides<sup>1</sup>

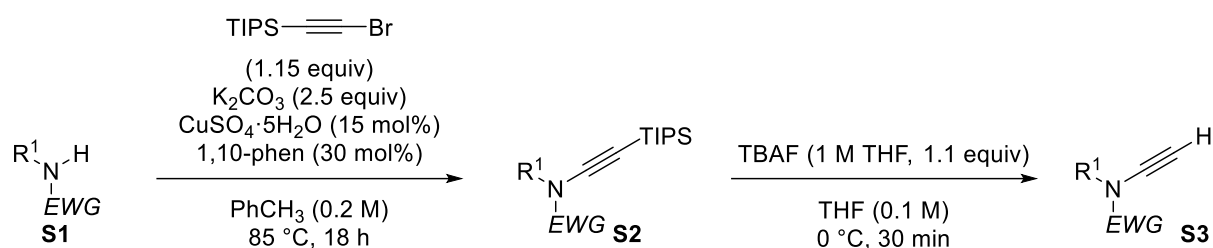

The (2-bromoethynyl)tris(propan-2-yl)silane was synthesized according to the literature.<sup>2</sup>

In a Schlenk tube was introduced CuSO<sub>4</sub>·5H<sub>2</sub>O (0.3 mmol, 15 mol%), 1,10-phenanthroline (0.6 mmol, 30 mol%), K<sub>2</sub>CO<sub>3</sub> (5 mmol, 2.5 equiv), the sulfonamide **S1** (2 mmol, 1 equiv), anhydrous toluene (0.2 M) and the bromo-acetylenic (2.3 mmol, 1.15 equiv). The reaction mixture was heated to 85 °C with an oil bath for 18 h and then cooled down to room temperature, filtered on a pad of Celite® and washed profusely with EtOAc. The filtrate was then concentrated under vacuum. The crude material was purified by column chromatography on silica gel using a mixture petroleum ether/EtOAc as eluent to afford the desired product **S2**.

TIPS protected ynamide **S2** (2.8 mmol, 1 equiv) was dissolved in dry THF (30 mL, 0.1 M) and cooled at 0 °C. A TBAF solution (3.1 mmol, 1.1 equiv, 1 M in THF) was added dropwise and the resulting mixture was stirred at 0 °C during 30 min and then hydrolyzed with water. The aqueous layer was extracted with Et<sub>2</sub>O (3x). The combined organic layers were washed with a saturated solution of NaCl, dried (Na<sub>2</sub>SO<sub>4</sub>), filtered and concentrated under vacuum. The crude material was purified by column chromatography on silica gel using a mixture petroleum ether/EtOAc, as eluent or just by washing with *n*-pentane and diethyl ether to afford the desired product **S3**.

### General procedure for preparation of *N*-allenamides

#### Trifluorinated *N*-allenamides<sup>3</sup> **1**

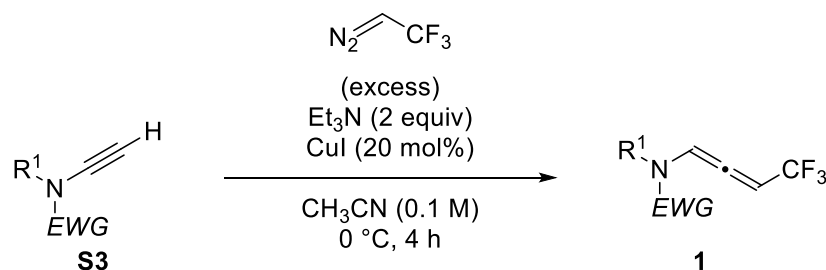

<sup>1</sup> (a) Y. Zhang, R. P. Hsung, M. R. Tracey, K. C. M. Kurtz and E. L. Vera, *Org. Lett.*, 2004, **6**, 1151–1154. (b) X. Zhang, R. P. Hsung, H. Li, Y. Zhang, W. L. Johnson and R. Figueroa, *Org. Lett.*, 2008, **10**, 3477–3479.

<sup>2</sup> H. Hofmeister, K. Annen, H. Laurent and R. Wiechert, *Angew. Chem. Int. Ed.* 1984, **23**, 727–729.

<sup>3</sup> Y. Zheng, B. Moegle, S. Ghosh, A. Perfetto, D. Luise, I. Ciofini and L. Miesch, *Chem. Eur. J.* 2022, **28**, e202103598.

1,1,1-trifluoro-diazoethane was synthesized according to the previous literature and stored in diethyl ether solution in the presence of Na<sub>2</sub>SO<sub>4</sub> at -18 °C for a few weeks.<sup>4</sup>

Ynamide **S3** (0.2 mmol, 1 equiv) was dissolved in dry CH<sub>3</sub>CN (0.1 M) in the presence of CuI (0.04 mmol, 20 mol%), and triethylamine (0.4 mmol, 2 equiv). A diethyl ether 1,1,1-trifluoro-diazoethane solution was added dropwise (in excess) and the reaction was stirred for 4 h at 0 °C. The mixture was concentrated under vacuum and the crude material was purified by column chromatography on silica gel using a mixture petroleum ether/EtOAc, as eluent to afford the desired products **1**.

#### Disubstituted *N*-allenamide **1n**

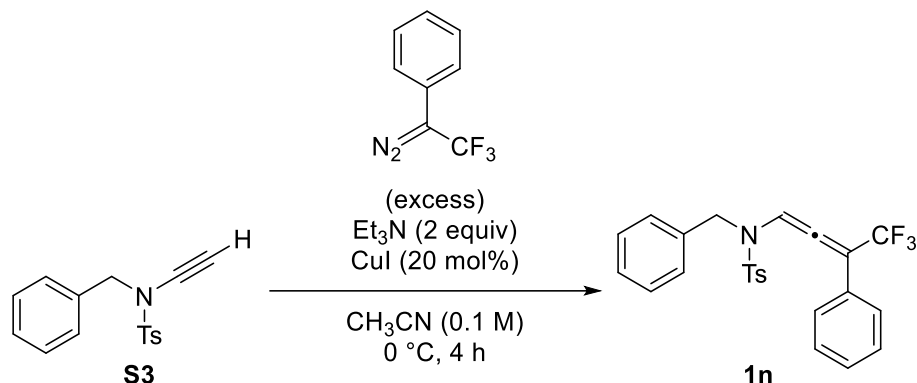

(1-diazo-2,2,2-trifluoroethyl)benzene was synthesized according to the previous literature and directly used.<sup>5</sup>

Benzyl-ynamide **S3** (127 mg, 0.45 mmol, 1 equiv) was dissolved in dry CH<sub>3</sub>CN (0.1 M) in the presence of CuI (0.09 mmol, 20 mol%), and triethylamine (0.9 mmol, 2 equiv). A diethyl ether (1-diazo-2,2,2-trifluoroethyl)benzene solution was added dropwise (in excess) and the reaction was stirred for 4 h at 0 °C. The mixture was concentrated under vacuum and the crude material was used without any further purification.

#### General procedure for the 1,2-semireduction of *N*-allenamides **1**

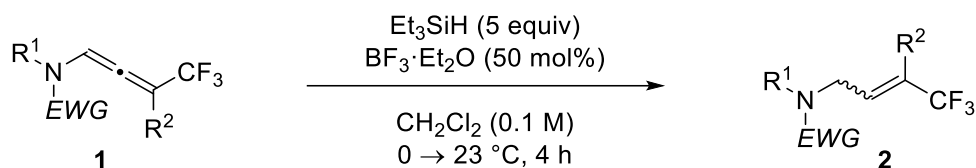

*N*-allenamide **1** (0.25 mmol, 1 equiv) was dissolved in dry CH<sub>2</sub>Cl<sub>2</sub> (0.1 M) and cooled to 0 °C. Et<sub>3</sub>SiH (1.25 mmol, 5 equiv) and BF<sub>3</sub>·Et<sub>2</sub>O (0.13 mmol, 50 mol%) were added dropwise. The reaction mixture was allowed to warm up at 23 °C and stirred for 4 h and then hydrolyzed with water. The organic layer was extracted with CH<sub>2</sub>Cl<sub>2</sub> (3x) and Et<sub>2</sub>O (1x). The organic layers were washed separately with a saturated solution of NaCl, combined, dried (Na<sub>2</sub>SO<sub>4</sub>), filtered and concentrated under vacuum. The crude material was purified by column chromatography on silica gel using a mixture petroleum ether/EtOAc, as eluent to afford the desired products **2**.

<sup>4</sup> H. Gilman and R. G. Jones, *J. Am. Chem. Soc.*, 1943, **65**, 1458–1460.

<sup>5</sup> X. Huang, M. Garcia-Borràs, K. Miao, S. B. J. Kan, A. Zutshi, K. N. Houk and F. H. Arnold, *ACS Cent. Sci.*, 2019, **5**, 270–276.

### General procedure for the isomerization of allylamide **2** to tertiary enamide **3**

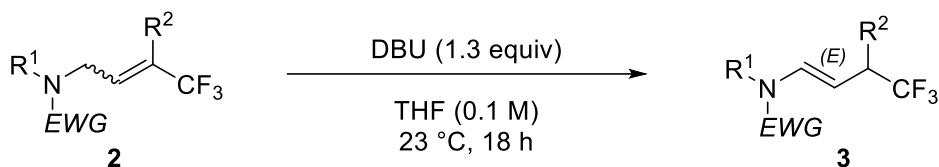

Allylamide **2** (0.1 mmol, 1 equiv) was dissolved in dry THF (0.1 M) and then DBU (0.13 mmol, 1.3 equiv) was added dropwise. The reaction mixture stirred at 23 °C for 18 h and then hydrolyzed with water. The organic layer was extracted with EtOAc (3x). The combined organic layers were washed with a saturated solution of NaCl, dried (Na<sub>2</sub>SO<sub>4</sub>), filtered and concentrated under vacuum. The crude material was purified by column chromatography on silica gel using a mixture petroleum ether/EtOAc, as eluent to afford the desired products **3**.

### Procedure for the preparation of **4**<sup>3</sup>

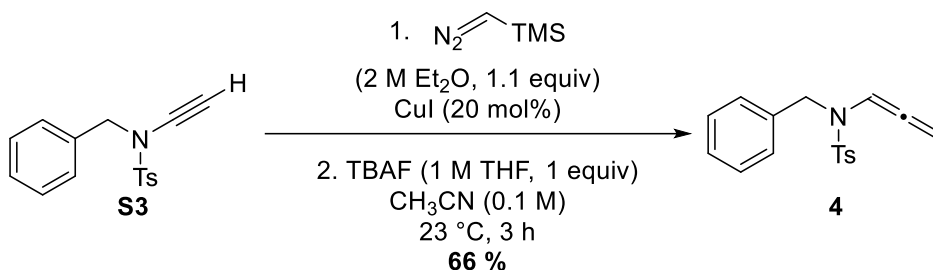

Benzyl-ynamide **S3** (70 mg, 0.25 mmol, 1 equiv) was dissolved in CH<sub>3</sub>CN (0.1 M). CuI (9 mg, 0.05 mmol, 20 mol%) and trimethylsilyldiazomethane (0.13 mL, 0.27 mmol, 1.1 equiv, 2 M Et<sub>2</sub>O) was added dropwise and the reaction mixture was stirred at 23 °C for 3 hours. A TBAF solution (0.25 mL, 0.25 mmol, 1 equiv, 1 M in THF) was added dropwise at 0 °C and the resulting mixture was stirred during 30 min and then hydrolyzed with water. The organic layer was extracted with CH<sub>2</sub>Cl<sub>2</sub> (3x) and Et<sub>2</sub>O (1x). The organic layers were washed separately with a saturated solution of NaCl, combined, dried (Na<sub>2</sub>SO<sub>4</sub>), filtered and concentrated under vacuum. The crude material was purified by column chromatography on silica gel using a mixture petroleum ether/EtOAc (from 100:0 to 95:5), as eluent to afford the terminal N-allenamide **4** (49 mg, 0.17 mmol, 66 %) as a colorless oil.

### Procedure for the preparation of **5**

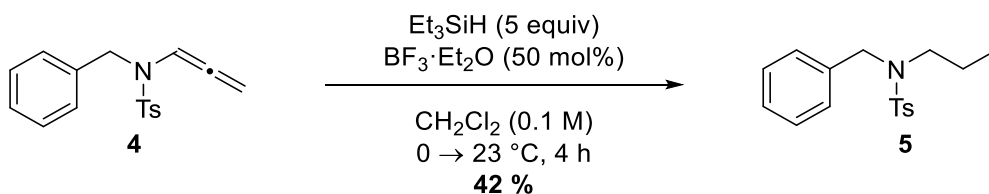

**4** (75 mg, 0.25 mmol, 1 equiv) was dissolved in dry CH<sub>2</sub>Cl<sub>2</sub> (0.1 M) and cooled to 0 °C. Et<sub>3</sub>SiH (0.20 mL, 1.25 mmol, 5 equiv) and BF<sub>3</sub>·Et<sub>2</sub>O (0.02 mL, 0.13 mmol, 50 mol%) were added dropwise. The reaction mixture was allowed to warm up at 23 °C and stirred for 4 h and then hydrolyzed with water. The organic layer was extracted with CH<sub>2</sub>Cl<sub>2</sub> (3x) and Et<sub>2</sub>O (1x). The organic layers were washed separately with a saturated solution of NaCl, combined, dried

(Na<sub>2</sub>SO<sub>4</sub>), filtered and concentrated under vacuum. The crude material was purified by column chromatography on silica gel using a mixture petroleum ether/EtOAc (from 100:0 to 60:40), as eluent to afford the desired products **5** (31.8 mg, 0.11 mmol, 42 %) as a colorless oil.

#### Procedure for the preparation of **6**<sup>6</sup>

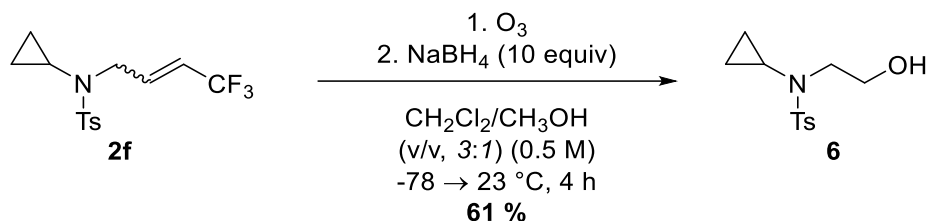

**2f** (51 mg, 0.16 mmol, 1 equiv) was dissolved in a mixture of CH<sub>2</sub>Cl<sub>2</sub> (2.4 mL) and CH<sub>3</sub>OH (0.8 mL) and the solution was cooled to -78 °C (dry-ice/acetone). To this solution was purged O<sub>3</sub> gas for 15 minutes followed by argon gas for additional 15 minutes. The resulting intermediate was quenched with NaBH<sub>4</sub> (60 mg, 1.6 mmol, 10 equiv). The reaction mixture was gently warmed to 23 °C for 3.5 hours and then cooled down to 0 °C and hydrolyzed with a saturated aqueous solution of NH<sub>4</sub>Cl. The organic layer was extracted with CH<sub>2</sub>Cl<sub>2</sub> (3x) and Et<sub>2</sub>O (1x). The organic layers were washed separately with a saturated solution of NaCl, combined, dried (Na<sub>2</sub>SO<sub>4</sub>), filtered and concentrated under vacuum. The crude material was purified by *flash* chromatography on silica gel using a mixture petroleum ether/EtOAc (from 88:12 to 0:100), as eluent to afford **6** (24.9 mg, 0.01 mmol, 61 %) as a white solid .

#### Procedure for the preparation of **7**

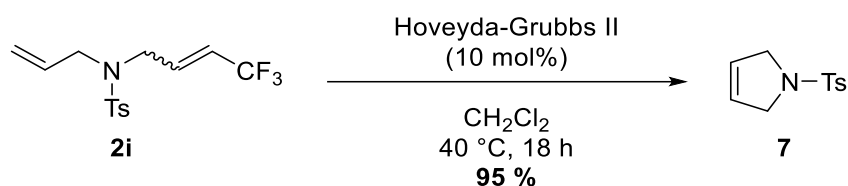

**2i** (83 mg, 0.26 mmol, 1 equiv) was dissolved in degassed CH<sub>2</sub>Cl<sub>2</sub>. Hoveyda-Grubbs II (16 mg, 0.02 mmol, 10 mol%) was then added and the reaction mixture was heated to 40 °C for 18 hours. The crude material was purified by *flash* chromatography on silica gel using a mixture petroleum ether/EtOAc (from 95:05 to 60:40), as eluent to afford **7** (55 mg, 0.25 mmol, 95 %) as a white solid .

## Characterization data

### *N*-allenamides **1a-v**

#### **Compound 1a** *N*-benzyl-4-methyl-*N*-(4,4,4-trifluorobuta-1,2-dien-1-yl)benzenesulfonamide<sup>3</sup>

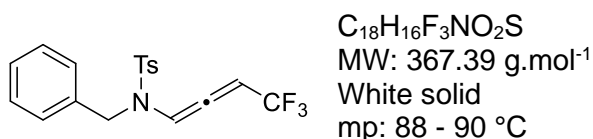

<sup>6</sup> M. S. Manna, S. Y. Yoo, M. Sharique, H. Choi, B. Pudasaini, M. Baik and U. K. Tambar, *Angew. Chem. Int. Ed.*, 2023, **62**, e202304848.

87 % (1.7 g)

The product was obtained by column chromatography on silica gel using petroleum ether/EtOAc (from 100:0 to 80:20) as eluent.

**<sup>1</sup>H NMR (300 MHz, CDCl<sub>3</sub>):** δ 7.79 – 7.67 (m, 2H), 7.45 – 7.38 (m, 1H), 7.38 – 7.32 (m, 2H), 7.30 – 7.18 (m, 5H), 5.68 (p, *J* = 5.6 Hz, 1H), 4.46 (d, *J* = 15.3 Hz, 1H), 4.12 (d, *J* = 15.3 Hz, 1H), 2.46 (s, 3H) ppm.

*This analytical data match with those described in the literature.*

**Compound 1b** *N*-(benzo[d][1,3]dioxol-5-ylmethyl)-4-methyl-*N*-(4,4,4-trifluorobuta-1,2-dien-1-yl)benzenesulfonamide<sup>7</sup>

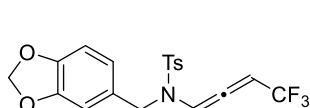

C<sub>19</sub>H<sub>16</sub>F<sub>3</sub>NO<sub>4</sub>S  
MW: 411.39 g.mol<sup>-1</sup>  
White solid  
mp: 110 - 112 °C  
75 % (2.3 g)

The product was obtained by column chromatography on silica gel using petroleum ether/EtOAc (from 100:0 to 80:20) as eluent.

**<sup>1</sup>H NMR (400 MHz, CDCl<sub>3</sub>):** δ 7.71 (d, *J* = 8.1 Hz, 2H), 7.41 – 7.37 (m, 1H), 7.35 (d, *J* = 8.1 Hz, 2H), 6.77 (d, *J* = 1.7 Hz, 1H), 6.73 – 6.62 (m, 2H), 5.93 (s, 2H), 5.75 (p, *J* = 5.6 Hz, 1H), 4.34 (d, *J* = 15.0 Hz, 1H), 4.06 (d, *J* = 15.0 Hz, 1H), 2.45 (s, 3H) ppm.

*This analytical data match with those described in the literature.*

**Compound 1c** *N*-(4-fluorobenzyl)-4-methyl-*N*-(4,4,4-trifluorobuta-1,2-dien-1-yl)benzenesulfonamide

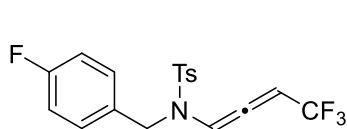

C<sub>18</sub>H<sub>15</sub>F<sub>4</sub>NO<sub>2</sub>S  
MW: 385.38 g.mol<sup>-1</sup>  
White solid  
mp: 99 - 101 °C

The product was obtained by column chromatography on silica gel using petroleum ether/EtOAc (from 100:0 to 80:20) as eluent.

**<sup>1</sup>H NMR (500 MHz, CDCl<sub>3</sub>):** δ 7.71 (d, *J* = 8.4 Hz, 2H), 7.43 – 7.38 (m, 1H), 7.36 (d, *J* = 8.1 Hz, 2H), 7.22 (dd, *J* = 8.6, 5.4 Hz, 2H), 6.97 (t, *J* = 8.7 Hz, 2H), 5.71 (p, *J* = 5.6 Hz, 1H), 4.38 (d, *J* = 15.3 Hz, 1H), 4.14 (d, *J* = 15.2 Hz, 1H), 2.46 (s, 3H).

**<sup>19</sup>F NMR (282 MHz, CDCl<sub>3</sub>):** δ -62.77, -114.41.

**<sup>13</sup>C NMR (126 MHz, CDCl<sub>3</sub>):** δ 198.9 (q, *J* = 5.9 Hz), 162.5 (d, *J* = 246.8 Hz), 144.8, 135.1, 130.5 (d, *J* = 3.2 Hz), 130.2 (x2), 129.5 (d, *J* = 8.3 Hz), 127.3 (x2), 121.2 (q, *J* = 272.3 Hz), 115.6 (d, *J* = 21.7 Hz), 106.8, 96.5 (q, *J* = 39.4 Hz), 50.4, 21.8.

**HRMS (ESI-TOF) m/z:** [M+Na]<sup>+</sup> calcd for C<sub>18</sub>H<sub>15</sub>F<sub>4</sub>NaNO<sub>2</sub>S 408.0652; found 408.0648.

**IR (neat):** ν = 3045, 1431, 1342, 1124, 944, 814, 543 cm<sup>-1</sup>.

<sup>7</sup> M. Hourtoule and L. Miesch, *Org. Lett.*, 2022, **24**, 3896–3900.

**Compound 1d** *N*-(2-bromobenzyl)-4-methyl-*N*-(4,4,4-trifluorobuta-1,2-dien-1-yl)benzenesulfonamide

---

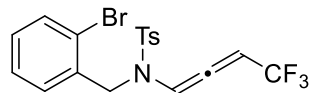

$C_{18}H_{15}BrF_3NO_2S$   
MW: 442.28 g.mol<sup>-1</sup>  
White solid  
mp: 94 - 96 °C

The product was obtained by column chromatography on silica gel using petroleum ether/EtOAc (from 100:0 to 80:20) as eluent.

**<sup>1</sup>H NMR (500 MHz, CDCl<sub>3</sub>)** δ 7.75 (dt, *J* = 8.5 Hz, 2.0 Hz, 2H), 7.49 (dd, *J* = 8.0, 1.5 Hz, 1H), 7.46–7.44 (m, 1H), 7.42–7.41 (m, 1H), 7.39–7.36 (m, 2H), 7.30–7.27 (m, 1H), 7.14–7.10 (m, 1H), 5.69 (p, *J* = 5.5 Hz, 1H), 4.41 (s, 2H), 2.47 (s, 3H).

**<sup>19</sup>F NMR (282 MHz, CDCl<sub>3</sub>)**: δ -62.72.

**<sup>13</sup>C NMR (126 MHz, CDCl<sub>3</sub>)**: δ 198.4 (q, *J* = 5.9 Hz), 144.9, 135.0, 133.5, 132.8, 130.3 (x2), 129.2, 128.1, 127.8, 127.3 (x2), 122.4, 121.0 (q, *J* = 272.5 Hz), 106.7, 96.6 (q, *J* = 39.6 Hz), 50.8, 21.8.

**HRMS (ESI-TOF) m/z**: [M+Na]<sup>+</sup> calcd for C<sub>18</sub>H<sub>15</sub>BrF<sub>3</sub>NaNO<sub>2</sub>S 467.9852; found 467.9846.

**IR (neat)**: ν = 3016, 1447, 1352, 1110, 922, 751, 596 cm<sup>-1</sup>.

**Compound 1e** *N*,4-dimethyl-*N*-(4,4,4-trifluorobuta-1,2-dien-1-yl)benzenesulfonamide

---

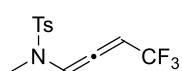

$C_{12}H_{12}F_3NO_2S$   
MW: 291.29 g.mol<sup>-1</sup>

**1e** was used without any further purification.

**Compound 1f** *N*-cyclopropyl-4-methyl-*N*-(4,4,4-trifluorobuta-1,2-dien-1-yl)benzenesulfonamide<sup>7</sup>

---

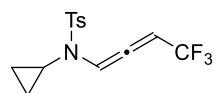

$C_{14}H_{14}F_3NO_2S$   
MW: 317.33 g.mol<sup>-1</sup>  
White solid  
mp: 53 – 56°C  
74 % (760 mg)

The product was obtained by column chromatography on silica gel using Petroleum ether / EtOAc (from 95:05 to 85:15) as eluent.

**<sup>1</sup>H NMR (300 MHz, CDCl<sub>3</sub>)** δ 7.79 – 7.71 (m, 2H), 7.39 – 7.33 (m, 2H), 7.33 – 7.30 (m, 1H), 5.88 (p, *J* = 5.6 Hz, 1H), 2.45 (s, 3H), 1.73 (tt, *J* = 6.9, 3.6 Hz, 1H), 1.12 – 0.88 (m, 2H), 0.83 – 0.64 (m, 2H).

*This analytical data match with those described in the literature.*

**Compound 1g** *N*-cyclopentyl-4-methyl-*N*-(4,4,4-trifluorobuta-1,2-dien-1-yl)benzenesulfonamide<sup>7</sup>

---



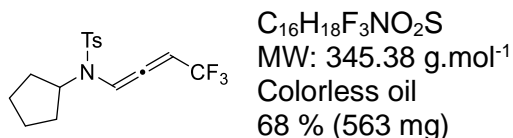

The product was obtained by column chromatography on silica gel using Petroleum ether / EtOAc (95:05 to 85:15) as eluent.

**<sup>1</sup>H NMR (500 MHz, CDCl<sub>3</sub>)** δ 7.71 (d, *J* = 8.3 Hz, 2H), 7.44 – 7.28 (m, 3H), 5.85 (p, *J* = 5.7 Hz, 1H), 4.41 (p, *J* = 8.7 Hz, 1H), 2.44 (s, 3H), 1.75 – 1.54 (m, 5H), 1.48 – 1.32 (m, 3H).

*This analytical data match with those described in the literature.*

**Compound 1h** 4-methyl-*N*-(4,4,4-trifluorobuta-1,2-dien-1-yl)-*N*-(2,2,2-trifluoroethyl)benzenesulfonamide<sup>8</sup>

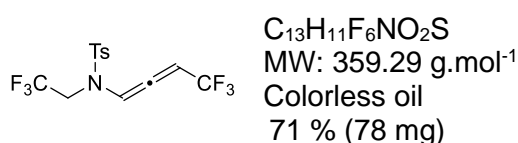

The product was obtained by column chromatography on silica gel using Petroleum ether / EtOAc (from 100:0 to 80:20) as eluent.

**<sup>1</sup>H NMR (500 MHz, CDCl<sub>3</sub>)**: δ 7.74 (d, *J* = 8.4 Hz, 2H), 7.53 – 7.33 (m, 3H), 6.07 (p, *J* = 5.5 Hz, 1H), 3.90 (dq, *J* = 15.6, 8.1, 0.8 Hz, 1H), 3.72 (dq, *J* = 16.1, 8.1 Hz, 1H), 2.49 (s, 3H).

*This analytical data match with those described in the literature.*

**Compound 1i** *N*-allyl-4-methyl-*N*-(4,4,4-trifluorobuta-1,2-dien-1-yl)benzenesulfonamide<sup>8</sup>

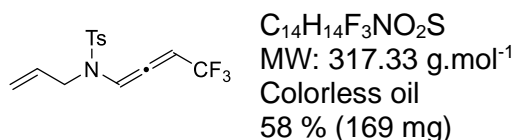

The product was obtained by column chromatography on silica gel using Petroleum ether / EtOAc (from 100:0 to 80:20) as eluent.

**<sup>1</sup>H NMR (500 MHz, CDCl<sub>3</sub>)**: δ 7.73 (d, *J* = 8.6 Hz, 2H), 7.48 – 7.40 (m, 1H), 7.36 (dd, *J* = 8.6, 0.8 Hz, 2H), 5.93 (p, *J* = 5.6 Hz, 1H), 5.69 – 5.54 (m, 1H), 5.18 (dt, *J* = 1.4, 0.8 Hz, 1H), 5.16 (dq, *J* = 7.8, 1.4 Hz, 1H), 3.87 (ddtd, *J* = 16.0, 5.5, 1.6, 0.8 Hz, 1H), 3.82 – 3.73 (ddtd, *J* = 16.0, 5.5, 1.6, 0.8 Hz, 1H), 2.47 (s, 3H).

*This analytical data match with those described in the literature.*

**Compound 1j** 4-methyl-*N*-(pent-4-en-1-yl)-*N*-(4,4,4-trifluorobuta-1,2-dien-1-yl)benzenesulfonamide<sup>7</sup>

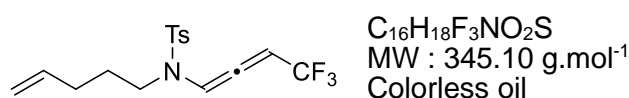

<sup>8</sup> M. Hourtoule and L. Miesch, *Org. Lett.*, 2023, **25**, 1727–1731.

Yield: 90 % (294 mg)

The product was obtained by column chromatography on silica gel using Petroleum ether / EtOAc (from 5:1 to 4:1) as eluent.

**<sup>1</sup>H NMR (500 MHz, C<sub>6</sub>D<sub>6</sub>):** δ = 7.55 (d, *J* = 8.3 Hz, 2H), 7.33– 7.30 (m, 1H), 6.73 (d, *J* = 8.0 Hz, 2H), 5.65– 5.57 (m, 1H), 5.36 (p, *J* = 5.6 Hz, 1H), 4.97 – 4.89 (m, 2H), 3.02 – 2.87 (m, 2H), 1.96 – 1.76 (m, 5H), 1.58 – 1.39 (m, 2H) ppm.

*This analytical data match with those described in the literature.*

**Compound 1k** *N*-(4-cyanobutyl)-4-methyl-*N*-(4,4,4-trifluorobuta-1,2-dien-1-yl)benzenesulfonamide<sup>7</sup>

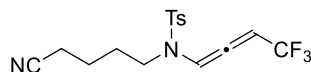

C<sub>16</sub>H<sub>17</sub>F<sub>3</sub>N<sub>2</sub>O<sub>2</sub>S  
MW: 358.38 g.mol<sup>-1</sup>  
Colorless oil  
64 % (257 mg)

The product was obtained by column chromatography on silica gel using Petroleum ether / EtOAc (from 95:05 to 70:30) as eluent.

**<sup>1</sup>H NMR (500 MHz, CDCl<sub>3</sub>):** δ 7.68 (d, *J* = 8.4 Hz, 2H), 7.47 – 7.38 (m, 1H), 7.35 (d, *J* = 8.4 Hz, 2H), 5.99 (p, *J* = 5.5 Hz, 1H), 3.14 (t, *J* = 6.6 Hz, 2H), 2.45 (s, 3H), 2.39 (tt, *J* = 6.6, 1.4 Hz, 2H), 1.74 – 1.65 (m, 4H) ppm.

*This analytical data match with those described in the literature.*

**Compound 1l** *N*-(2-chloroethyl)-4-methyl-*N*-(4,4,4-trifluorobuta-1,2-dien-1-yl)benzenesulfonamide<sup>7</sup>

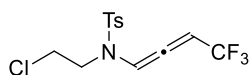

C<sub>13</sub>H<sub>13</sub>ClF<sub>3</sub>NO<sub>2</sub>S  
MW: 339.76 g.mol<sup>-1</sup>  
White solid  
mp: 56 – 57°C  
74 % (281 mg)

The product was obtained by column chromatography on silica gel using Petroleum ether / EtOAc (from 95:05 to 85:15) as eluent.

**<sup>1</sup>H NMR (500 MHz, CDCl<sub>3</sub>):** δ 7.71 (d, *J* = 8.1 Hz, 1H), 7.42 (dq, *J* = 6.0, 3.0 Hz, 1H), 7.36 (d, *J* = 8.1 Hz, 2H), 6.03 (p, *J* = 5.5 Hz, 1H), 3.58 – 3.51 (m, 2H), 3.45 – 3.38 (m, 2H), 2.45 (s, 3H)

*This analytical data match with those described in the literature.*

**Compound 1m** *N,N'*-(butane-1,4-diyl)bis(4-methyl-*N*-(4,4,4-trifluorobuta-1,2-dien-1-yl)benzenesulfonamide)

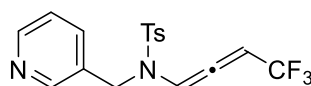

C<sub>17</sub>H<sub>15</sub>F<sub>3</sub>N<sub>2</sub>O<sub>2</sub>S  
MW: 368.37 g.mol<sup>-1</sup>  
Orange oil  
52 % (244 mg) (2 steps)

The product was obtained by column chromatography on silica gel using Petroleum ether / EtOAc (from 90:10 to 0:100) as eluent.

**<sup>1</sup>H NMR (500 MHz, C<sub>6</sub>D<sub>6</sub>):** δ 8.43 (s, 2H), 7.49 (d, *J* = 8.3 Hz, 2H), 7.42 (d, *J* = 7.8 Hz, 1H), 7.19 – 7.17 (m, 1H), 6.72 (d, *J* = 8.1 Hz, 2H), 6.70 – 6.63 (m, 1H), 5.12 (s, 1H), 3.98 (d, *J* = 15.5 Hz, 1H), 3.74 (d, *J* = 15.4 Hz, 1H), 1.84 (s, 3H).

**<sup>19</sup>F NMR (282 MHz, C<sub>6</sub>D<sub>6</sub>):** δ -62.66.

**<sup>13</sup>C NMR (126 MHz, C<sub>6</sub>D<sub>6</sub>):** δ 199.0 (q, *J* = 6.0 Hz), 149.8, 149.8, 144.4, 135.7, 134.9, 130.1 (x2), 128.4, 128.2, 127.4 (x2), 121.7 (q, *J* = 271.7 Hz), 106.9, 96.4 (q, *J* = 41.0 Hz), 48.4, 21.1.

**HRMS (ESI-TOF) *m/z*:** [M+H]<sup>+</sup> calcd for C<sub>17</sub>H<sub>16</sub>F<sub>3</sub>N<sub>2</sub>O<sub>2</sub>S 369.0885; found 369.0879.

**IR (neat) :** ν = 3043, 2962, 1597, 1451, 1429, 1359, 1267, 1168, 1131, 930, 908, 814, 666, 600, 547 cm<sup>-1</sup>.

**Compound 1n** *N*-benzyl-4-methyl-*N*-(4,4,4-trifluoro-3-phenylbuta-1,2-dien-1-yl)benzenesulfonamide

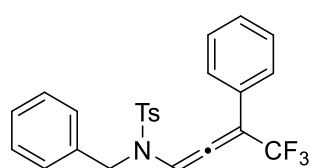

C<sub>24</sub>H<sub>20</sub>F<sub>3</sub>NO<sub>2</sub>S  
MW: 443.48 g.mol<sup>-1</sup>

**1n** was used without any further purification.

**Compound 1o** *N*-phenethyl-*N*-(4,4,4-trifluorobuta-1,2-dien-1-yl)methanesulfonamide<sup>9</sup>

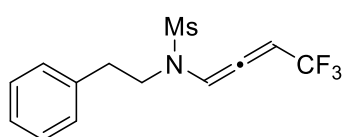

C<sub>13</sub>H<sub>14</sub>F<sub>3</sub>NO<sub>2</sub>S  
MW: 305.32 g.mol<sup>-1</sup>  
White solid  
mp: 115 – 118 °C  
59 % (477 mg)

The product was obtained by column chromatography on silica gel using Petroleum ether / EtOAc (from 100:0 to 80:20) as eluent.

**<sup>1</sup>H NMR (300 MHz, C<sub>6</sub>D<sub>6</sub>):** δ = 7.14 – 7.02 (m, 2H), 7.06 – 6.96 (m, 3H), 6.94 (dt, *J* = 6.3, 3.2 Hz, 1H), 5.46 (p, *J* = 5.6 Hz, 1H), 3.26 – 3.03 (m, 2H), 2.64 (dd, *J* = 8.6, 7.1 Hz, 2H), 1.86 (s, 3H).

*This analytical data match with those described in the literature.*

**Compound 1p** *N*-benzyl-*N*-(4,4,4-trifluorobuta-1,2-dien-1-yl)cyclopropanesulfonamide

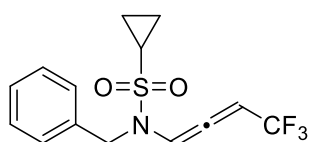

C<sub>14</sub>H<sub>14</sub>F<sub>3</sub>NO<sub>2</sub>S  
MW: 317.33 g.mol<sup>-1</sup>  
White solid  
mp: 73 – 75 °C

The product was obtained by column chromatography on silica gel using petroleum ether/EtOAc (from 100:0 to 80:20) as eluent.

<sup>9</sup> C. Gommenginger, Y. Zheng, D. Maccarone, I. Ciofini and L. Miesch, *Org. Chem. Front.*, 2023, **10**, 4055–4060.

**<sup>1</sup>H NMR (500 MHz, CDCl<sub>3</sub>)** δ 7.30–7.25 (m, 4H), 7.24–7.20 (m, 2H), 5.73 (p, *J* = 5.5 Hz, 1H), 4.64 (d, *J* = 15.5 Hz, 1H), 4.38 (d, *J* = 15.5 Hz, 1H), 2.35–2.30 (m, 1H), 1.22–1.18 (m, 2H), 1.00–0.96 (m, 2H).

**<sup>19</sup>F NMR (282 MHz, CDCl<sub>3</sub>)**: δ 62.61.

**<sup>13</sup>C NMR (126 MHz, CDCl<sub>3</sub>)**: δ 198.7 (q, *J* = 5.9 Hz), 135.2, 128.7 (x2), 128.1, 127.7 (x2), 121.3 (q, *J* = 272.2 Hz), 107.2, 96.7 (q, *J* = 39.4 Hz), 51.2, 30.2, 5.7, 5.6.

**HRMS (ESI-TOF) m/z**: [M+Na]<sup>+</sup> calcd for C<sub>14</sub>H<sub>14</sub>F<sub>3</sub>NaNO<sub>2</sub>S 340.0590; found 340.0574.

**IR (neat)** : ν = 3033, 1453, 1347, 1118, 937, 885, 607 cm<sup>-1</sup>.

**Compound 1q** *N*-benzyl-4-nitro-*N*-(4,4,4-trifluorobuta-1,2-dien-1-yl)benzenesulfonamide<sup>7</sup>

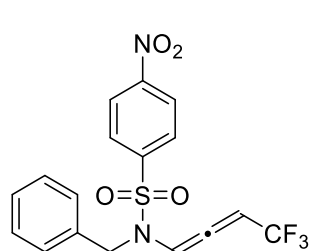

C<sub>17</sub>H<sub>13</sub>F<sub>3</sub>N<sub>2</sub>O<sub>4</sub>S  
MW: 398.36 g.mol<sup>-1</sup>  
White solidmp: 92 - 95°C  
81 % (163 mg)

The product was obtained by column chromatography on silica gel using Petroleum ether / EtOAc (from 100:0 to 70:30) as eluent.

**<sup>1</sup>H NMR (500 MHz, CDCl<sub>3</sub>)**: δ 8.37 (d, *J* = 8.9 Hz, 1H), 7.97 (d, *J* = 8.9 Hz, 1H), 7.39 (dq, *J* = 6.1, 3.1 Hz, 1H), 7.28 (dt, *J* = 4.6, 2.2 Hz, 3H), 7.24 – 7.18 (m, 2H), 5.79 (p, *J* = 5.5 Hz, 1H), 4.54 (dd, *J* = 15.3, 1.0 Hz, 1H), 4.24 (d, *J* = 15.2 Hz, 1H) ppm.

*This analytical data match with those described in the literature.*

**Compound 1r** *N*-benzyl-*N*-(4,4,4-trifluorobuta-1,2-dien-1-yl)thiophene-2-sulfonamide

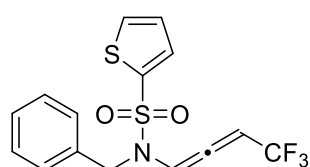

C<sub>15</sub>H<sub>12</sub>F<sub>3</sub>NO<sub>2</sub>S<sub>2</sub>  
MW: 359.38 g.mol<sup>-1</sup>  
White solid  
mp: 68 – 70 °C

The product was obtained by column chromatography on silica gel using Petroleum ether / EtOAc (from 100:0 to 80:20) as eluent.

**<sup>1</sup>H NMR (500 MHz, CDCl<sub>3</sub>)**: δ 7.67 (dd, *J* = 5.0, 1.5 Hz, 1H), 7.62 (dd, *J* = 4.0, 1.5 Hz, 1H), 7.35–7.32 (m, 1H), 7.31–7.24 (m, 5H), 7.14 (dd, *J* = 5.0, 3.5 Hz, 1H), 5.72 (p, *J* = 6.0 Hz, 1H), 4.53 (d, *J* = 15.0 Hz, 1H), 4.21 (d, *J* = 15.0 Hz, 1H).

**<sup>19</sup>F NMR (282 MHz, CDCl<sub>3</sub>)**: δ -62.63.

**<sup>13</sup>C NMR (126 MHz, CDCl<sub>3</sub>)**: δ 199.2 (q, *J* = 6.0 Hz), 138.0, 134.6, 133.3, 133.1, 128.7 (x2), 128.1, 127.9, 127.7 (x2), 121.2 (q, *J* = 272.2 Hz), 106.4, 96.6 (q, *J* = 39.4 Hz), 51.3.

**HRMS (ESI-TOF) m/z**: [M+Na]<sup>+</sup> calcd for C<sub>15</sub>H<sub>12</sub>F<sub>3</sub>NaNO<sub>2</sub>S<sub>2</sub> 382.0154; found 382.0150.

**IR (neat)** : ν = 3106, 3036, 1447, 1357, 1118, 1024, 739, 571 cm<sup>-1</sup>

**Compound 1s** 2-(4,4,4-trifluorobuta-1,2-dien-1-yl)-2,3-dihydrobenzo[d]isothiazole 1,1-dioxide<sup>7</sup>

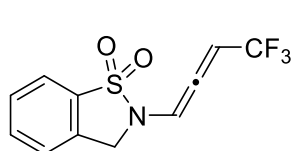

$C_{11}H_8F_3NO_2S$   
 MW: 275.24 g.mol<sup>-1</sup>  
 White solid  
 mp: 140 – 145 °C  
 58 % (248 mg)

The product was obtained by column chromatography on silica gel using Petroleum ether / EtOAc (from 95:05 to 80:20) as eluent.

**<sup>1</sup>H NMR (300 MHz, CDCl<sub>3</sub>)**: δ 7.85 (ddd, *J* = 7.7, 1.3, 0.6 Hz, 1H), 7.69 (td, *J* = 7.7, 1.3 Hz, 1H), 7.63 – 7.55 (m, 1H), 7.47 (dt, *J* = 7.8, 0.9 Hz, 1H), 7.32 (dq, *J* = 5.9, 2.9 Hz, 1H), 6.17 (p, *J* = 5.9 Hz, 1H), 4.46 (d, *J* = 4.8 Hz, 2H) ppm.

*This analytical data match with those described in the literature.*

**Compound 1t** 8,8-dimethyl-1-(4,4,4-trifluorobuta-1,2-dien-1-yl)hexahydro-3H-3a,6-methanobenzo[c]isothiazole 2,2-dioxide<sup>8</sup>

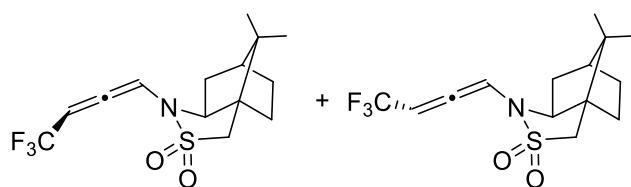

$C_{14}H_{18}F_3NO_2S$   
 MW: 321.26 g.mol<sup>-1</sup>  
 Colorless oil  
 61 % (96.3 mg)

The product was obtained by column chromatography on silica gel using Petroleum ether / EtOAc (from 95:05 to 80:20) as eluent.

**<sup>1</sup>H NMR (500 MHz, CDCl<sub>3</sub>)**: δ 6.86 – 6.77 (m, 2H), 6.04 – 5.95 (m, 2H), 3.36 – 3.18 (m, 6H), 2.06 – 1.98 (m, 2H), 1.96 – 1.86 (m, 6H), 1.62 (dt, *J* = 13.0, 8.1 Hz, 2H), 1.53 – 1.42 (m, 2H), 1.38 – 1.26 (m, 2H), 1.11 (s, 6H), 0.95 (s, 6H).

*This analytical data match with those described in the literature.*

**Compound 1u** *N,N*-(butane-1,4-diyl)bis(4-methyl-*N*-(4,4,4-trifluorobuta-1,2-dien-1-yl)benzenesulfonamide)

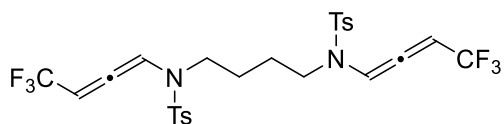

$C_{26}H_{26}F_6N_2O_4S$   
 MW: 608.61 g.mol<sup>-1</sup>  
 White solid  
 28 % (112 mg)

The product was obtained by column chromatography on silica gel using Petroleum ether / EtOAc (from 100:0 to 60:40) as eluent.

**<sup>1</sup>H NMR (300 MHz, CDCl<sub>3</sub>)**: δ 7.68 (d, *J* = 8.4 Hz, 4H), 7.43 – 7.30 (m, 6H), 5.94 (p, *J* = 5.5 Hz, 2H), 3.19 – 3.01 (m, 4H), 2.45 (s, 6H), 1.53 – 1.48 (m, 4H).

**<sup>19</sup>F NMR (282 MHz, CDCl<sub>3</sub>)**: δ -62.18, -62.19.

**<sup>13</sup>C NMR (126 MHz, CDCl<sub>3</sub>)**: δ 198.5 (q, *J* = 5.7 Hz) (x2), 144.7 (x2), 135.1, 135.0, 130.2 (x4), 127.3 (x4), 121.4 (q, *J* = 271.8 Hz) (x2), 107.0, 107.0, 96.4 (q, *J* = 39.2 Hz) (x2), 46.5, 46.4, 23.9, 23.8, 21.8 (x2).

**HRMS (ESI-TOF) m/z**: [M+Na]<sup>+</sup> calcd for C<sub>26</sub>H<sub>26</sub>F<sub>6</sub>NaN<sub>2</sub>O<sub>4</sub>S 631.1000; found 631.1004.

**IR (neat)**: ν = 3048, 2925, 1598, 1434, 1359, 1265, 1168, 1131, 684, 601, 547 cm<sup>-1</sup>.

**Compound 1v** 4-methyl-*N*-(2-(1-oxo-1,2,3,4-tetrahydronaphthalen-2-yl)ethyl)-*N*-(4,4,4-trifluorobuta-1,2-dien-1-yl)benzenesulfonamide

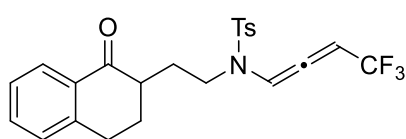

$C_{23}H_{22}F_3NO_2S$   
MW: 449.49 g.mol<sup>-1</sup>

**1v** was used without any further purification.

### Allylamides **2a-v**

**Compound 2a** *N*-benzyl-4-methyl-*N*-(4,4,4-trifluorobut-2-en-1-yl)benzenesulfonamide

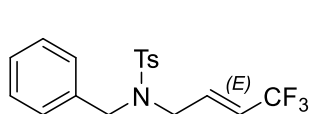

+

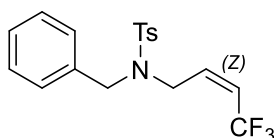

$C_{18}H_{18}F_3NO_2S$   
MW: 369.40 g.mol<sup>-1</sup>  
Colorless oil  
80 % (73.6 mg)  
*E/Z* ratio = 80:20

The product was obtained by column chromatography on silica gel using petroleum ether/EtOAc (from 100:0 to 60:40) as eluent.

Only *E*-stereoisomer was described for <sup>13</sup>C-NMR.

**<sup>1</sup>H NMR (500 MHz, CDCl<sub>3</sub>):** δ 7.73 (d, *J* = 8.3 Hz, 4H, *E* + *Z*), 7.35 (d, *J* = 8.2 Hz, 4H, *E* + *Z*), 7.33 – 7.21 (m, 10H, *E* + *Z*), 6.05 – 5.95 (m, 1H, *Z*), 5.79 (dt, *J* = 12.1, 6.2 Hz, 1H, *E*), 5.51 – 5.40 (m, 2H, *E* + *Z*), 4.38 – 4.24 (m, 4H, *E* + *Z*), 3.96 (dt, *J* = 6.3, 2.3 Hz, 2H, *E*), 3.81 (dt, *J* = 5.9, 1.9 Hz, 2H, *Z*), 2.46 (s, 6H, *E* + *Z*).

**<sup>13</sup>C NMR (126 MHz, CDCl<sub>3</sub>):** δ 144.0, 138.8 (q, *J* = 5.0 Hz), 136.3, 135.5, 130.1 (x2), 128.8 (x2), 128.7 (x2), 128.3, 127.5 (x2), 122.8 (q, *J* = 271.9 Hz), 119.4 (q, *J* = 34.4 Hz), 52.7, 45.4 (q, *J* = 1.8 Hz), 21.7.

**IR (neat):** ν = 3068, 2928, 1341, 1223, 1159, 1125, 1094, 721, 656, 549 cm<sup>-1</sup>.

**Compound 2b** *N*-(benzo[*d*][1,3]dioxol-5-ylmethyl)-4-methyl-*N*-(4,4,4-trifluorobut-2-en-1-yl)benzenesulfonamide

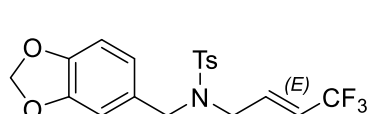

+

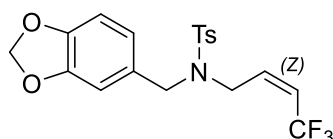

$C_{19}H_{18}F_3NO_4S$   
MW: 413.41 g.mol<sup>-1</sup>  
White solid  
mp: 65 – 68 °C  
98 % (62 mg)  
*E/Z* ratio = 80:20

The product was obtained by column chromatography on silica gel using petroleum ether/EtOAc (from 100:0 to 60:40) as eluent.

Only *E*-stereoisomer was described for <sup>13</sup>C-NMR.

**<sup>1</sup>H NMR (400 MHz, CDCl<sub>3</sub>):** δ 7.72 (d, *J* = 8.3 Hz, 4H, *E* + *Z*), 7.35 (d, *J* = 7.8 Hz, 4H, *E* + *Z*), 6.87 – 6.59 (m, 6H, *E* + *Z*), 5.95 (s, 5H, *E* + *Z*), 5.81 (dt, *J* = 12.2, 6.2 Hz, 1H, *E*), 5.56 – 5.42 (m, 2H, *E* + *Z*), 4.24 – 4.15 (m, 4H, *E* + *Z*), 3.95 (dp, *J* = 6.7, 2.3 Hz, 2H, *E*), 3.80 (dt, *J* = 6.1, 2.1 Hz, 2H, *Z*), 2.46 (s, 6H, *E* + *Z*).

**<sup>13</sup>C NMR (126 MHz, CDCl<sub>3</sub>):** δ 148.2, 147.7, 144.0, 138.9 (q, *J* = 5.0 Hz), 136.3, 130.1 (x2), 129.2, 127.4 (x2), 122.9 (q, *J* = 271.9 Hz), 122.3, 119.3 (q, *J* = 34.4 Hz), 109.1, 108.3, 101.3, 52.5, 45.2 (q, *J* = 1.7 Hz), 21.7.

**IR (neat):** ν = 2924, 1504, 1145, 1383, 1241, 1116, 1018, 927, 707, 697, 633, 511 cm<sup>-1</sup>.

**Compound 2c** *N*-(4-fluorobenzyl)-4-methyl-*N*-(4,4,4-trifluorobut-2-en-1-yl)benzenesulfonamide

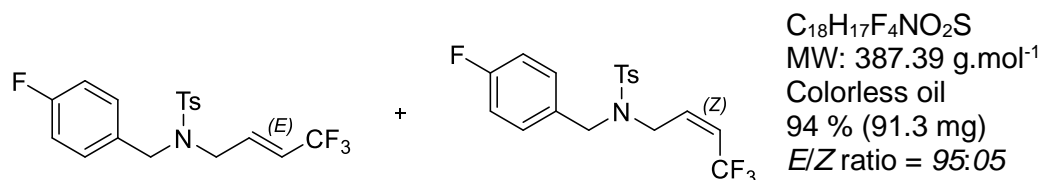

The product was obtained by column chromatography on silica gel using petroleum ether/EtOAc (from 100:0 to 60:40) as eluent.

Only *E*-stereoisomer was described for <sup>13</sup>C-NMR.

**<sup>1</sup>H NMR (500 MHz, CDCl<sub>3</sub>):** δ 7.65 (d, *J* = 8.4 Hz, 2H, *E*), 7.59 (d, *J* = 8.3 Hz, 2H, *Z*), 7.28 (d, *J* = 8.1 Hz, 2H, *E*), 7.25 (d, *J* = 8.1 Hz, 2H, *Z*), 7.21 – 7.12 (m, 4H, *E* + *Z*), 6.97 – 6.86 (m, 4H, *E* + *Z*), 5.97 – 5.87 (m, 1H, *Z*), 5.70 (dd, *J* = 11.9, 6.3 Hz, 1H, *E*), 5.49 – 5.31 (m, 2H, *E* + *Z*), 4.39 (s, 2H, *Z*), 4.19 (s, 2H, *E*), 3.88 (dt, *J* = 6.3, 2.2 Hz, 2H, *E*), 3.73 (dt, *J* = 3.9, 2.0 Hz, 2H, *Z*), 2.38 (s, 3H, *E*), 2.36 (s, 3H, *Z*).

**<sup>13</sup>C NMR (126 MHz, CDCl<sub>3</sub>):** δ 162.5 (d, *J* = 246.7 Hz), 143.8, 138.4 (q, *J* = 5.0 Hz), 136.0, 131.1 (d, *J* = 3.2 Hz), 130.2 (d, *J* = 8.3 Hz), 129.9 (x2), 128.5 (d, *J* = 8.1 Hz), 127.1 (x2), 122.5 (q, *J* = 271.9 Hz), 119.4 (q, *J* = 34.4 Hz), 115.5 (d, *J* = 21.6 Hz), 99.0 (q, *J* = 3.7 Hz), 51.7, 45.2 (q, *J* = 1.6 Hz), 21.4.

**IR (neat):** ν = 2941, 1604, 1510, 1340, 1224, 1159, 1126, 1092, 549 cm<sup>-1</sup>.

**Compound 2d** *N*-(2-bromobenzyl)-4-methyl-*N*-(4,4,4-trifluorobut-2-en-1-yl)benzenesulfonamide

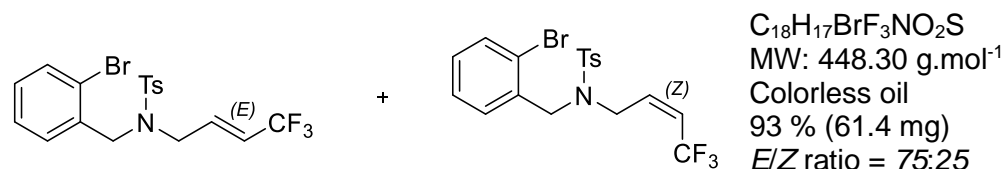

The product was obtained by column chromatography on silica gel using petroleum ether/EtOAc (from 100:0 to 60:40) as eluent.

Only *E*-stereoisomer was described for <sup>13</sup>C-NMR.

**<sup>1</sup>H NMR (500 MHz, CDCl<sub>3</sub>):** δ 7.74 (d, *J* = 8.4 Hz, 4H, *E* + *Z*), 7.56 – 7.47 (m, 4H, *E* + *Z*), 7.36 (d, *J* = 7.8 Hz, 4H, *E* + *Z*), 7.31 (td, *J* = 7.5, 1.4 Hz, 2H, *E* + *Z*), 7.19 – 7.12 (m, 2H, *E* + *Z*), 6.10

– 5.95 (m, 1H, *Z*), 5.83 (dt, *J* = 12.2, 6.2 Hz, 1H, *E*), 5.56 – 5.43 (m, 2H, *E* + *Z*), 4.45 (s, 4H, *E* + *Z*), 4.02 (dt, *J* = 6.3, 2.3 Hz, 2H, *E*), 3.86 (dd, *J* = 4.1, 2.0 Hz, 2H, *Z*), 2.46 (s, 6H, *E* + *Z*).

**<sup>13</sup>C NMR (126 MHz, CDCl<sub>3</sub>):** δ 144.0, 138.0 (q, *J* = 5.0 Hz), 136.0, 134.7, 132.9, 130.2, 130.0 (x2), 129.5, 127.8, 127.3 (x2), 123.4, 122.6 (d, *J* = 271.9 Hz), 119.6 (q, *J* = 34.4 Hz), 52.0, 45.8 (d, *J* = 2.1 Hz), 21.6.

**IR (neat):** ν = 2945, 1598, 1441, 1344, 1161, 1126, 1093, 753, 633, 515 cm<sup>-1</sup>.

**Compound 2e** *N*,4-dimethyl-*N*-(4,4,4-trifluorobut-2-en-1-yl)benzenesulfonamide

---

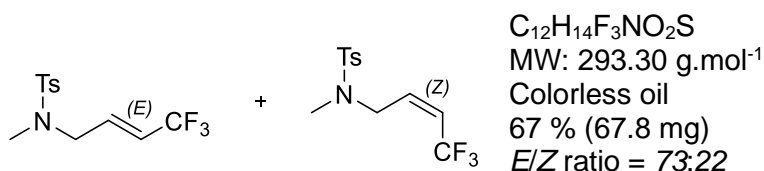

The product was obtained by column chromatography on silica gel using petroleum ether/EtOAc (from 100:0 to 60:40) as eluent.

Only *E*-stereoisomer was described for <sup>13</sup>C-NMR.

**<sup>1</sup>H NMR (500 MHz, CDCl<sub>3</sub>):** δ 7.70 (d, *J* = 8.3 Hz, 4H, *E* + *Z*), 7.37 (d, *J* = 8.5 Hz, 4H, *E* + *Z*), 6.36 – 6.25 (m, 1H, *Z*), 6.04 (dt, *J* = 11.8, 6.8 Hz, 1H, *E*), 5.91 – 5.73 (m, 2H, *E* + *Z*), 3.92 (dt, *J* = 6.6, 2.0 Hz, 2H, *E*), 3.79 (tt, *J* = 4.3, 2.1 Hz, 2H, *Z*), 2.73 (s, 6H, *E* + *Z*), 2.47 (s, 6H, *E* + *Z*).

**<sup>13</sup>C NMR (126 MHz, CDCl<sub>3</sub>):** δ 144.0, 138.0 (q, *J* = 5.0 Hz), 134.3, 130.0 (x2), 127.6 (x2), 122.8 (d, *J* = 268.9 Hz), 121.4 (q, *J* = 34.4 Hz), 47.7 (q, *J* = 1.5 Hz), 35.2, 21.7.

**IR (neat):** ν = 2930, 1674, 1598, 1457, 1413, 1341, 1203, 1162, 1090, 694, 550 cm<sup>-1</sup>.

**Compound 2f** *N*-cyclopropyl-4-methyl-*N*-(4,4,4-trifluorobut-2-en-1-yl)benzenesulfonamide

---

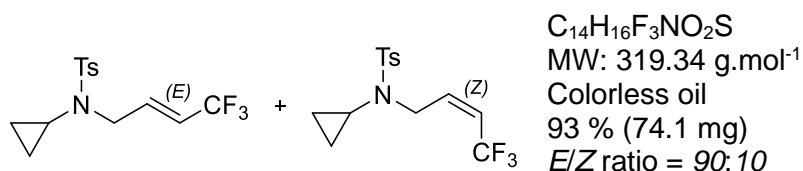

The product was obtained by column chromatography on silica gel using petroleum ether/EtOAc (from 100:0 to 60:40) as eluent.

Only *E*-stereoisomer was described for <sup>13</sup>C-NMR.

**<sup>1</sup>H NMR (500 MHz, CDCl<sub>3</sub>):** δ 7.74 (d, *J* = 8.3 Hz, 4H, *E* + *Z*), 7.34 (d, *J* = 8.0 Hz, 4H, *E* + *Z*), 6.36 – 6.25 (m, 1H, *Z*), 6.06 (dt, *J* = 11.8, 6.5 Hz, 1H, *E*), 5.86 – 5.73 (m, 1H, *Z*), 5.72 – 5.59 (m, 1H, *E*), 4.06 (dp, *J* = 6.5, 2.1 Hz, 2H, *E*), 3.92 (dp, *J* = 6.1, 2.1 Hz, 2H, *Z*), 2.45 (s, 6H, *E* + *Z*), 2.04 (tt, *J* = 6.9, 3.6 Hz, 2H, *E* + *Z*), 0.87 – 0.81 (m, 4H, *E* + *Z*), 0.74 – 0.67 (m, 4H, *E* + *Z*).

**<sup>13</sup>C NMR (126 MHz, CDCl<sub>3</sub>):** δ 144.1, 139.1 (q, *J* = 5.1 Hz), 135.0, 129.9 (x2), 127.9 (x2), 123.0 (q, *J* = 271.8 Hz), 119.6 (q, *J* = 34.4 Hz), 48.6 (q, *J* = 1.5 Hz), 31.1, 21.7, 7.7 (x2).

**IR (neat):** ν = 2966, 2936, 1672, 1566, 1457, 1342, 1174, 1123, 817, 710, 687, 521 cm<sup>-1</sup>.

**Compound 2g** *N*-cyclopentyl-4-methyl-*N*-(4,4,4-trifluorobut-2-en-1-yl)benzenesulfonamide

---



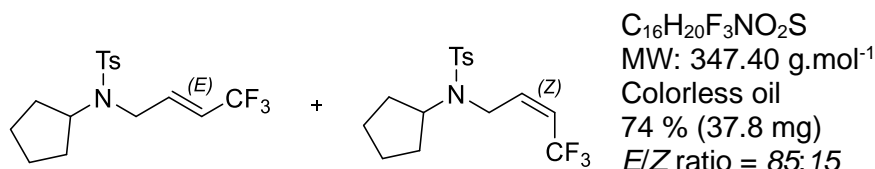

The product was obtained by column chromatography on silica gel using petroleum ether/EtOAc (from 100:0 to 60:40) as eluent.

Only *E*-stereoisomer was described for <sup>13</sup>C-NMR.

**<sup>1</sup>H NMR (500 MHz, CDCl<sub>3</sub>):** δ 7.69 (d, *J* = 8.3 Hz, 4H, *E* + *Z*), 7.35 – 7.28 (m, 4H; *E* + *Z*), 6.42 – 6.33 (m, 1H, *Z*), 6.19 (dt, *J* = 11.7, 5.7 Hz, 1H, *E*), 5.92 – 5.81 (m, 1H, *Z*), 5.61 (dq, *J* = 11.3, 8.9, 2.3 Hz, 1H, *E*), 4.30 (p, *J* = 8.8 Hz, 2H, *E* + *Z*), 3.95 (dt, *J* = 5.8, 2.5 Hz, 2H, *E*), 3.83 (dp, *J* = 4.8, 2.4 Hz, 2H, *Z*), 2.43 (s, 6H, *E* + *Z*), 1.78 – 1.65 (m, 4H, *E* + *Z*), 1.63 – 1.55 (m, 4H, *E* + *Z*), 1.53 – 1.42 (m, 4H, *E* + *Z*), 1.36 – 1.22 (m, 4H, *E* + *Z*).

**<sup>13</sup>C NMR (126 MHz, CDCl<sub>3</sub>):** δ 143.6, 142.7 (q, *J* = 4.9 Hz), 137.2, 129.9 (x2), 127.3 (x2), 123.1 (q, *J* = 271.8 Hz), 117.7 (q, *J* = 34.4 Hz), 59.3, 41.2 (q, *J* = 1.6 Hz), 29.2 (x2), 23.6 (x2), 21.8.

**IR (neat):** ν = 2959, 2874, 1341, 1156, 1092, 659, 547 cm<sup>-1</sup>.

**Compound 2h** 4-methyl-*N*-(4,4,4-trifluorobut-2-en-1-yl)-*N*-(2,2,2-trifluoroethyl)benzenesulfonamide

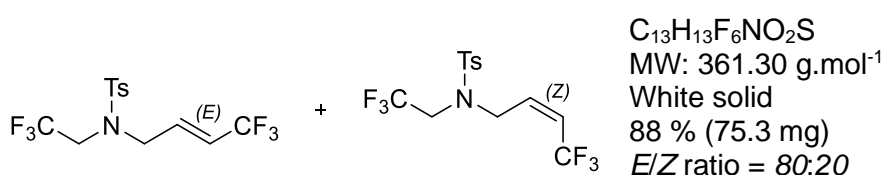

The product was obtained by column chromatography on silica gel using petroleum ether/EtOAc (from 100:0 to 60:40) as eluent.

Only *E*-stereoisomer was described for <sup>13</sup>C-NMR.

**<sup>1</sup>H NMR (500 MHz, CDCl<sub>3</sub>):** δ 7.72 (d, *J* = 8.4 Hz, 4H, *E* + *Z*), 7.37 – 7.31 (m, 4H, *E* + *Z*), 6.25 – 6.14 (m, 1H, *Z*), 6.02 (dt, *J* = 11.9, 6.5 Hz, 1H, *E*), 5.77 (dq, *J* = 12.6, 8.6, 2.0 Hz, 2H, *E* + *Z*), 4.10 (dt, *J* = 6.4, 2.0 Hz, 2H, *E*), 3.99 (dt, *J* = 6.3, 2.3 Hz, 2H, *Z*), 3.85 (q, *J* = 8.7 Hz, 4H, *E* + *Z*), 2.45 (s, 6H, *E* + *Z*).

**<sup>13</sup>C NMR (126 MHz, CDCl<sub>3</sub>):** δ 144.5, 137.3 (d, *J* = 5.3 Hz), 135.6, 129.9 (x2), 127.3 (x2), 123.8 (d, *J* = 280.2 Hz), 122.4 (d, *J* = 272.1 Hz), 121.4 (q, *J* = 34.4 Hz), 48.3 (q, *J* = 35.1 Hz), 46.4, 21.5.

**IR (neat):** ν = 2952, 1440, 1352, 1273, 1228, 1162, 1129, 1091, 1053 cm<sup>-1</sup>.

**Compound 2i** *N*-allyl-4-methyl-*N*-(4,4,4-trifluorobut-2-en-1-yl)benzenesulfonamide

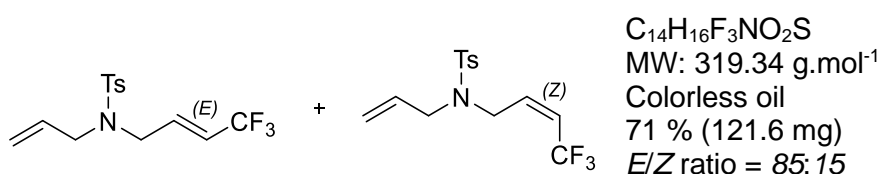

The product was obtained by column chromatography on silica gel using petroleum ether/EtOAc (from 100:0 to 60:40) as eluent.

Only *E*-stereoisomer was described.

**<sup>1</sup>H NMR (500 MHz, CDCl<sub>3</sub>):** δ 7.70 (d, *J* = 8.3 Hz, 2H, *E*), 7.32 (d, *J* = 8.1 Hz, 2H, *E*), 5.99 (dt, *J* = 12.4, 6.3 Hz, 1H, *E*), 5.72 – 5.57 (m, 2H, *E*), 5.28 – 4.97 (m, 2H, *E*), 4.01 (dt, *J* = 6.4, 2.2 Hz, 2H, *E*), 3.79 (dt, *J* = 6.3, 1.4 Hz, 2H, *E*), 2.44 (s, 3H, *E*).

**<sup>13</sup>C NMR (126 MHz, CDCl<sub>3</sub>):** δ 143.9, 139.1 (q, *J* = 5.0 Hz), 136.6, 132.2, 130.03 (x2), 127.4 (x2), 122.9 (q, *J* = 271.9 Hz), 119.9 (q, *J* = 34.5 Hz), 119.9, 51.3, 44.7 (q, *J* = 1.7 Hz), 21.7.

**IR (neat):** ν = 2927, 1645, 1598, 1419, 1348, 1224, 1157, 1122, 1093, 663, 548 cm<sup>-1</sup>.

**Compound 2j** 4-methyl-*N*-(pent-4-en-1-yl)-*N*-(4,4,4-trifluorobut-2-en-1-yl)benzenesulfonamide

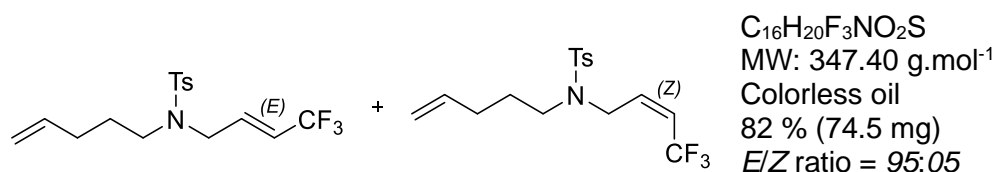

The product was obtained by column chromatography on silica gel using petroleum ether/EtOAc (from 100:0 to 60:40) as eluent.

Only *E*-stereoisomer was described.

**<sup>1</sup>H NMR (500 MHz, CDCl<sub>3</sub>):** δ 7.68 (d, *J* = 8.3 Hz, 2H, *E*), 7.32 (d, *J* = 8.0 Hz, 2H, *E*), 6.00 (dt, *J* = 11.8, 6.4 Hz, 1H, *E*), 5.90 – 5.62 (m, 2H, *E*), 5.14 – 4.90 (m, 2H, *E*), 4.01 (dp, *J* = 6.5, 2.2 Hz, 2H, *E*), 3.16 – 3.09 (m, 2H, *E*), 2.44 (s, 3H, *E*), 2.04 (q, *J* = 7.1 Hz, 2H, *E*), 1.67 – 1.58 (m, 2H, *E*).

**<sup>13</sup>C NMR (126 MHz, CDCl<sub>3</sub>):** δ 143.8, 139.5 (q, *J* = 5.0 Hz), 137.4, 136.5, 130.0 (x2), 127.3 (x2), 122.9 (d, *J* = 271.0 Hz), 120.1 (q, *J* = 34.3 Hz), 115.6, 48.5, 45.7 (q, *J* = 1.8 Hz), 30.8, 27.6, 21.7.

**IR (neat):** ν = 2966, 2924, 2860, 1671, 1642, 1599, 1446, 1415, 1341, 1276, 1221, 1160, 1124, 549 cm<sup>-1</sup>.

**Compound 2k** *N*-(4-cyanobutyl)-4-methyl-*N*-(4,4,4-trifluorobut-2-en-1-yl)benzenesulfonamide

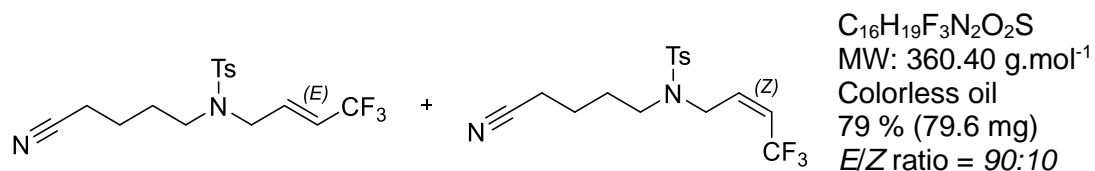

The product was obtained by column chromatography on silica gel using petroleum ether/EtOAc (from 100:0 to 60:40) as eluent.

Only *E*-stereoisomer was described for <sup>13</sup>C-NMR.

**<sup>1</sup>H NMR (500 MHz, CDCl<sub>3</sub>):** δ 7.68 (d, *J* = 8.3 Hz, 2H, *E*), 7.62 (d, *J* = 8.4 Hz, 2H, *Z*), 7.34 (d, *J* = 7.9 Hz, 4H, *E* + *Z*), 6.24 – 6.14 (m, 1H, *Z*), 5.97 (dt, *J* = 11.8, 6.6 Hz, 1H, *E*), 5.77 – 5.65

(m, 2H, *E* + *Z*), 4.00 (dp, *J* = 6.3, 2.1 Hz, 2H, *E*), 3.88 (dt, *J* = 6.0, 2.1 Hz, 2H, *Z*), 3.17 (t, *J* = 6.5 Hz, 4H, *E* + *Z*), 2.44 (s, 6H, *E* + *Z*), 2.45 – 2.37 (m, 4H, *E* + *Z*), 1.77 – 1.65 (m, 8H, *E* + *Z*).

**<sup>13</sup>C NMR (126 MHz, CDCl<sub>3</sub>):** δ 144.1, 138.8 (d, *J* = 4.8 Hz), 136.0, 130.2 (x2), 127.3 (x2), 122.8 (d, *J* = 273.4 Hz), 120.6 (q, *J* = 34.4 Hz), 119.3, 47.8, 45.8 (q, *J* = 1.3 Hz), 27.1, 22.4, 21.7, 16.7.

**IR (neat):** ν = 2936, 2874, 1671, 1598, 1339, 1159, 1124, 847, 817, 549 cm<sup>-1</sup>.

**Compound 2l** *N*-(2-chloroethyl)-4-methyl-*N*-(4,4,4-trifluorobut-2-en-1-yl)benzenesulfonamide

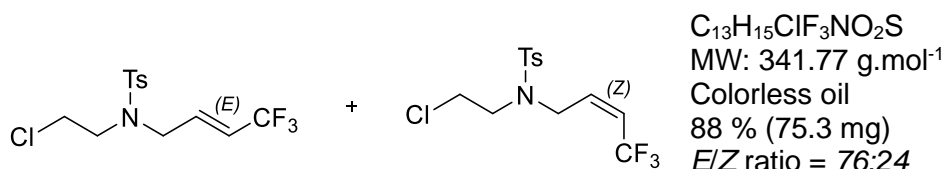

The product was obtained by column chromatography on silica gel using petroleum ether/EtOAc (from 100:0 to 60:40) as eluent.

Only *E*-stereoisomer was described for <sup>13</sup>C-NMR.

**<sup>1</sup>H NMR (500 MHz, CDCl<sub>3</sub>):** δ 7.71 (d, *J* = 8.3 Hz, 4H, *E* + *Z*), 7.34 (d, *J* = 7.9 Hz, 4H, *E* + *Z*), 6.32 – 6.14 (m, 1H, *Z*), 6.03 (dt, *J* = 11.8, 6.6 Hz, 1H, *E*), 5.87 – 5.61 (m, 2H, *E* + *Z*), 4.07 (dt, *J* = 6.5, 2.1 Hz, 2H, *E*), 3.99 (dt, *J* = 5.8, 2.1 Hz, 2H, *Z*), 3.76 – 3.56 (m, 4H, *E* + *Z*), 3.50 – 3.39 (m, 4H, *E* + *Z*), 2.45 (s, 6H, *E* + *Z*).

**<sup>13</sup>C NMR (126 MHz, CDCl<sub>3</sub>):** δ 144.3, 138.6 (q, *J* = 5.2 Hz), 135.9, 130.2 (x2), 127.4 (x2), 124.3 (q, *J* = 283.9 Hz), 120.9 (q, *J* = 34.1 Hz), 50.4, 47.0 (q, *J* = 1.7 Hz), 41.9, 21.7.

**IR (neat):** ν = 2999, 2943, 1343, 1160, 1126, 1093, 816, 693, 550 cm<sup>-1</sup>.

**Compound 2m** 4-methyl-*N*-(pyridin-3-ylmethyl)-*N*-(4,4,4-trifluorobut-2-en-1-yl)benzenesulfonamide

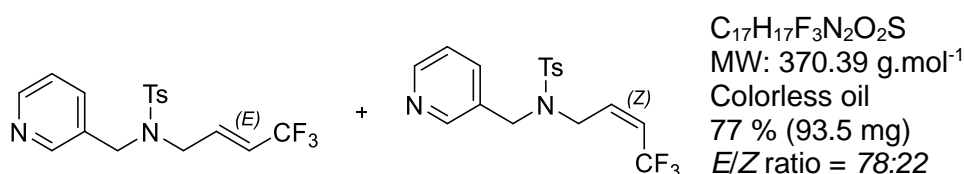

The product was obtained by column chromatography on silica gel using petroleum ether/EtOAc (from 100:0 to 60:40) as eluent.

Only *E*-stereoisomer was described for <sup>13</sup>C-NMR.

**<sup>1</sup>H NMR (500 MHz, CDCl<sub>3</sub>):** δ 8.53 (d, *J* = 51.4 Hz, 4H, *E* + *Z*), 7.73 (d, *J* = 8.3 Hz, 4H, *E* + *Z*), 7.73 – 7.64 (m, 2H, *E* + *Z*), 7.36 (d, *J* = 7.9 Hz, 4H, *E* + *Z*), 7.31 (dd, *J* = 20.4, 7.0 Hz, 2H, *E* + *Z*), 6.10 – 5.93 (m, 1H, *Z*), 5.79 (dt, *J* = 11.9, 6.4 Hz, 1H, *E*), 5.61 – 5.47 (m, 2H, *E* + *Z*), 4.52 (s, 2H, *Z*), 4.32 (s, 2H, *E*), 3.98 (dt, *J* = 6.5, 2.2 Hz, 2H, *E*), 3.83 (dt, *J* = 6.2, 2.0 Hz, 2H, *Z*), 2.46 (s, 6H, *E* + *Z*).

**<sup>13</sup>C NMR (126 MHz, CDCl<sub>3</sub>):** δ 149.8, 144.7, 144.3, 138.2 (q, *J* = 5.0 Hz), 136.4, 136.0, 131.8, 130.3 (x2), 127.4 (x2), 127.1, 122.7 (d, *J* = 272.0 Hz), 120.3 (q, *J* = 34.5 Hz), 50.2, 45.7 (d, *J* = 1.8 Hz), 21.7.

**IR (neat):**  $\nu = 3035, 2843, 1619, 1428, 1342, 1274, 1223, 1161, 1126, 1092, 815, 771, 697, 516 \text{ cm}^{-1}$ .

**Compound 2n** *N*-benzyl-4-methyl-*N*-(4,4,4-trifluoro-3-phenylbut-2-en-1-yl)benzenesulfonamide

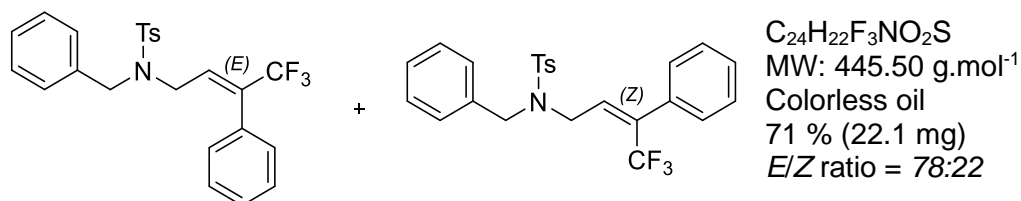

The product was obtained by column chromatography on silica gel using petroleum ether/EtOAc (from 100:0 to 60:40) as eluent.

Only *E*-stereoisomer was described for <sup>13</sup>C-NMR.

**<sup>1</sup>H NMR (400 MHz, CDCl<sub>3</sub>):**  $\delta$  7.76 (d, *J* = 8.3 Hz, 2H, *E*), 7.67 (d, *J* = 8.3 Hz, 2H, *Z*), 7.38 – 7.11 (m, 21H, *E* + *Z*), 6.97 (dd, *J* = 5.7, 3.5 Hz, 3H, *E* + *Z*), 6.13 (tt, *J* = 6.5, 1.7 Hz, 1H, *Z*), 5.75 (t, *J* = 6.1 Hz, 1H, *E*), 4.36 (s, 2H, *E*), 4.25 (s, 2H, *Z*), 4.11 (dd, *J* = 6.0, 2.6 Hz, 2H, *E*), 3.76 – 3.58 (m, 2H, *Z*), 2.45 (s, 3H, *E*), 2.44 (s, 3H, *Z*).

**<sup>13</sup>C NMR (126 MHz, CDCl<sub>3</sub>):**  $\delta$  143.9, 137.5 (q, *J* = 2.8 Hz), 136.5, 135.7, 135.4, 130.1 (x2), 129.4 (x2), 128.9 (x2), 128.8 (x2), 128.6, 128.3 (x2), 128.2, 128.0, 127.4 (x2), 123.6 (q, *J* = 275.8 Hz), 52.9, 46.2 (q, *J* = 3.6 Hz), 21.7.

**IR (neat):**  $\nu = 3064, 3033, 2923, 2863, 1598, 1495, 1455, 1446, 1344, 1289, 1202, 1161, 1099, 734, 699, 549 \text{ cm}^{-1}$ .

**Compound 2o** *N*-phenethyl-*N*-(4,4,4-trifluorobut-2-en-1-yl)methanesulfonamide

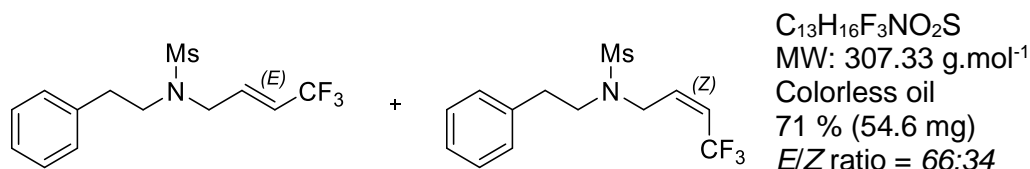

The product was obtained by column chromatography on silica gel using petroleum ether/EtOAc (from 100:0 to 60:40) as eluent.

Only *E*-stereoisomer was described for <sup>13</sup>C-NMR.

**<sup>1</sup>H NMR (500 MHz, CDCl<sub>3</sub>):**  $\delta$  7.34 – 7.29 (m, 6H, *E* + *Z*), 7.26 – 7.18 (m, 4H, *E* + *Z*), 6.40 – 6.23 (m, 1H, *Z*), 6.03 (dt, *J* = 11.8, 6.7 Hz, 1H, *E*), 5.91 – 5.69 (m, 2H, *E* + *Z*), 4.10 (dt, *J* = 6.7, 2.0 Hz, 2H, *E*), 3.90 (dt, *J* = 6.0, 2.1 Hz, 2H, *Z*), 3.47 (dt, *J* = 7.8, 6.4 Hz, 4H, *E* + *Z*), 2.96 – 2.85 (m, 4H, *E* + *Z*), 2.69 (s, 3H, *Z*), 2.65 (s, 3H, *E*).

**<sup>13</sup>C NMR (126 MHz, CDCl<sub>3</sub>):**  $\delta$  138.9 (q, *J* = 5.0 Hz), 138.1, 129.1 (x2), 128.9 (x2), 127.0, 122.9 (q, *J* = 270.6 Hz), 121.0 (q, *J* = 34.3 Hz), 49.8, 45.1 (q, *J* = 1.6 Hz), 39.0, 35.2.

**IR (neat):**  $\nu = 3065, 3012, 2864, 1330, 1145, 1124, 963, 701, 519 \text{ cm}^{-1}$ .

**Compound 2p** *N*-benzyl-*N*-(4,4,4-trifluorobut-2-en-1-yl)cyclopropanesulfonamide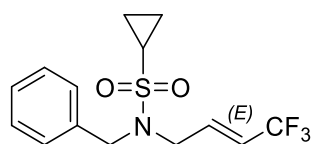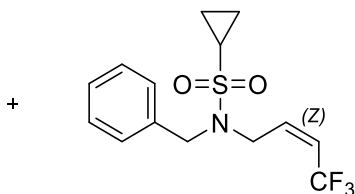

$C_{14}H_{16}F_3NO_2S$   
MW: 319.34 g.mol<sup>-1</sup>  
Colorless oil  
89 % (71.4 mg)  
*E/Z* ratio = 78:22

The product was obtained by column chromatography on silica gel using petroleum ether/EtOAc (from 100:0 to 60:40) as eluent.

Only *E*-stereoisomer was described for <sup>13</sup>C-NMR.

<sup>1</sup>H NMR (500 MHz, CDCl<sub>3</sub>): δ 7.42 – 7.28 (m, 10H, *E* + *Z*), 6.37 – 6.21 (m, 1H, *Z*), 6.00 (dt, *J* = 11.9, 6.3 Hz, 1H, *E*), 5.72 (dddd, *J* = 15.8, 7.9, 6.2, 4.6 Hz, 1H, *Z*), 5.66 – 5.54 (m, 1H, *E*), 4.43 (s, 4H, *E* + *Z*), 4.11 (dp, *J* = 6.6, 2.2 Hz, 2H, *E*), 3.90 (dp, *J* = 6.2, 2.1 Hz, 2H, *Z*), 2.48 – 2.21 (m, 2H, *E* + *Z*), 1.35 – 1.18 (m, 4H, *E* + *Z*), 1.09 – 0.98 (m, 4H, *E* + *Z*).

<sup>13</sup>C NMR (126 MHz, CDCl<sub>3</sub>): δ 139.0 (q, *J* = 5.0 Hz), 135.8, 128.9 (x2), 128.7 (x2), 128.3, 122.8 (q, *J* = 271.8 Hz), 120.0 (q, *J* = 34.5 Hz), 52.2, 45.2 (q, *J* = 1.7 Hz), 29.8, 5.5 (x2).

IR (neat): ν = 3065, 2925, 2876, 1335, 1126, 889, 703 cm<sup>-1</sup>.

**Compound 2q** *N*-benzyl-4-nitro-*N*-(4,4,4-trifluorobut-2-en-1-yl)benzenesulfonamide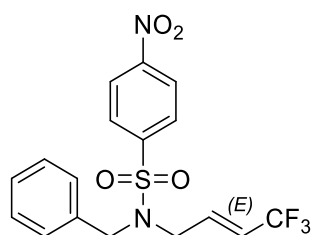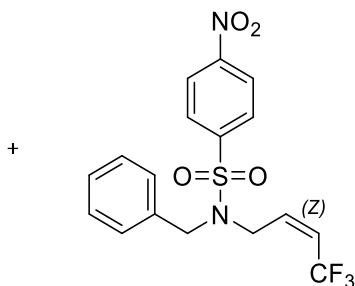

$C_{17}H_{15}F_3N_2O_4S$   
MW: 400.37 g.mol<sup>-1</sup>  
Colorless oil  
74 % (89.7 mg)  
*E/Z* ratio = 80:20

The product was obtained by column chromatography on silica gel using petroleum ether/EtOAc (from 100:0 to 60:40) as eluent.

Only *E*-stereoisomer was described for <sup>13</sup>C-NMR.

<sup>1</sup>H NMR (500 MHz, CDCl<sub>3</sub>): δ 8.38 (d, *J* = 8.8 Hz, 4H, *E* + *Z*), 7.99 (d, *J* = 8.8 Hz, 4H, *E* + *Z*), 7.37 – 7.18 (m, 10H, *E* + *Z*), 6.11 – 5.99 (m, 1H, *Z*), 5.78 (dt, *J* = 11.9, 6.3 Hz, 1H, *E*), 5.64 – 5.48 (m, 2H, *E* + *Z*), 4.39 (s, 4H, *E* + *Z*), 4.04 (dp, *J* = 6.4, 2.2 Hz, 2H, *E*), 3.89 (dp, *J* = 6.1, 2.1 Hz, 2H, *Z*).

<sup>13</sup>C NMR (126 MHz, CDCl<sub>3</sub>): δ 150.3, 145.4, 137.7 (q, *J* = 5.0 Hz), 134.6, 129.0 (x2), 128.7 (x2), 128.7, 128.5 (x2), 124.7 (x2), 122.7 (q, *J* = 272.0 Hz), 120.3 (q, *J* = 34.5 Hz), 52.7, 45.5 (q, *J* = 1.7 Hz).

IR (neat): ν = 2363, 2340, 1531, 1350, 1162, 1124, 856, 738, 693, 609, 536, 463 cm<sup>-1</sup>.

**Compound 2r** *N*-benzyl-*N*-(4,4,4-trifluorobut-2-en-1-yl)thiophene-2-sulfonamide

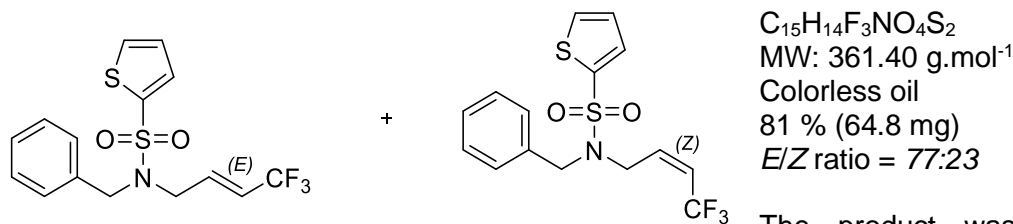

The product was obtained by column chromatography on silica gel using petroleum ether/EtOAc (from 100:0 to 60:40) as eluent.

Only *E*-stereoisomer was described for <sup>13</sup>C-NMR.

**<sup>1</sup>H NMR (500 MHz, CDCl<sub>3</sub>):** δ 7.75 – 7.60 (m, 4H, *E* + *Z*), 7.39 – 7.29 (m, 10H, *E* + *Z*), 7.18 (dd, *J* = 5.1, 3.7 Hz, 2H, *E* + *Z*), 6.25 – 6.00 (m, 1H, *Z*), 5.84 (dt, *J* = 12.3, 6.3 Hz, 1H, *E*), 5.64 – 5.45 (m, 2H, *E* + *Z*), 4.36 (s, 4H, *E* + *Z*), 4.04 (dq, *J* = 6.4, 2.2 Hz, 2H, *E*), 3.88 (dt, *J* = 6.1, 2.0 Hz, 2H, *Z*).

**<sup>13</sup>C NMR (126 MHz, CDCl<sub>3</sub>):** δ 139.7, 138.4 (q, *J* = 5.1 Hz), 135.2, 132.5, 132.3, 128.9 (x2), 128.8 (x2), 128.4, 127.8, 122.8 (q, *J* = 271.8 Hz), 119.6 (q, *J* = 34.5 Hz), 53.0, 45.8 (q, *J* = 1.7 Hz).

**IR (neat):** ν = 3106, 2963, 2874, 1673, 1406, 1349, 1257, 1155, 722, 703, 581 cm<sup>-1</sup>.

**Compound 2s** 2-(4,4,4-trifluorobut-2-en-1-yl)-2,3-dihydrobenzo[*d*]isothiazole 1,1-dioxide

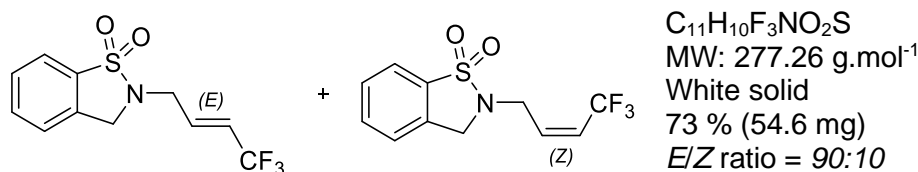

The product was obtained by column chromatography on silica gel using petroleum ether/EtOAc (from 100:0 to 60:40) as eluent.

Only *E*-stereoisomer was described for <sup>13</sup>C-NMR.

**<sup>1</sup>H NMR (500 MHz, CDCl<sub>3</sub>):** δ 7.80 (dd, *J* = 18.4, 8.0 Hz, 2H, *E* + *Z*), 7.63 (td, *J* = 7.6, 1.2 Hz, 2H, *E* + *Z*), 7.55 (td, *J* = 7.6, 1.0 Hz, 2H, *E* + *Z*), 7.41 (t, *J* = 0.9 Hz, 2H, *E* + *Z*), 6.56 – 6.48 (m, 1H, *Z*), 6.26 (dt, *J* = 11.8, 7.2 Hz, 1H, *E*), 5.91 (dq, *J* = 12.0, 8.5, 1.8 Hz, 2H, *E* + *Z*), 4.37 (s, 4H, *E* + *Z*), 4.21 (dp, *J* = 7.4, 2.0 Hz, 2H, *E*), 4.04 (dt, *J* = 5.9, 2.1 Hz, 2H, *Z*).

**<sup>13</sup>C NMR (126 MHz, CDCl<sub>3</sub>):** δ 136.8 (q, *J* = 5.1 Hz), 134.8, 133.5, 133.1, 129.5, 124.7, 122.8 (d, *J* = 266.2 Hz), 122.6 (q, *J* = 34.4 Hz), 121.7, 50.3, 41.3 (q, *J* = 1.5 Hz).

**IR (neat):** ν = 2943, 2865, 1675, 1299, 1225, 1175, 1127, 783, 570 cm<sup>-1</sup>.

**Compound 2t** (6*S*,7*aS*)-8,8-dimethyl-1-(4,4,4-trifluorobut-2-en-1-yl)hexahydro-3*H*-3*a*,6-methanobenzo[*c*]isothiazole 2,2-dioxide

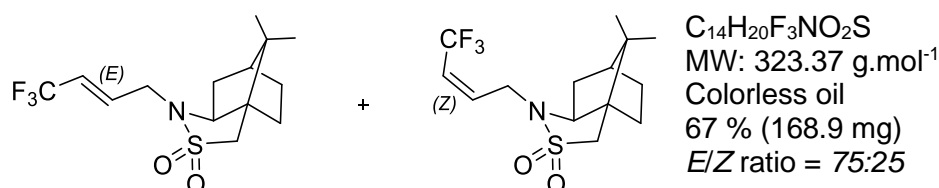

The product was obtained by column chromatography on silica gel using petroleum ether/EtOAc (from 100:0 to 60:40) as eluent. Both diastereomers are separable by column chromatography.

- **Compound 2t-E** (6S,7aS)-8,8-dimethyl-1-((E)-4,4,4-trifluorobut-2-en-1-yl)hexahydro-3H-3a,6-methanobenzo[c]isothiazole 2,2-dioxide

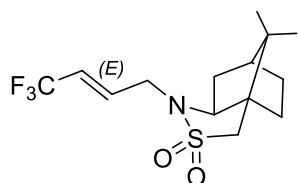

**<sup>1</sup>H NMR (500 MHz, CDCl<sub>3</sub>):** δ 6.47 (dddt, *J* = 15.6, 6.5, 4.3, 2.1 Hz, 1H), 6.00 – 5.79 (m, 1H), 3.83 (dtd, *J* = 15.9, 4.1, 2.0 Hz, 1H), 3.53 (dtd, *J* = 15.9, 6.4, 2.0 Hz, 1H), 3.16 (s, 2H), 3.10 (dd, *J* = 8.0, 4.4 Hz, 1H), 2.00 – 1.79 (m, 4H), 1.66 – 1.61 (m, 1H), 1.48 – 1.42 (m, 1H), 1.34 – 1.23 (m, 1H), 1.13 (s, 3H), 0.93 (s, 3H).

**<sup>19</sup>F NMR (282 MHz, CDCl<sub>3</sub>):** δ -66.42.

**<sup>13</sup>C NMR (126 MHz, CDCl<sub>3</sub>):** δ 135.2 (q, *J* = 6.4 Hz), 122.5 (q, *J* = 269.7 Hz), 122.3 (q, *J* = 34.2 Hz), 67.3, 50.1, 49.5, 47.8, 44.8, 43.7, 35.6, 32.4, 27.0, 20.5, 20.1.

**HRMS (ESI-TOF) m/z:** [M+Na]<sup>+</sup> calcd for C<sub>14</sub>H<sub>20</sub>F<sub>3</sub>NaNO<sub>2</sub>S 346.1059; found 346.1053.

**IR (neat):** ν = 2958, 2883, 1673, 1456, 1308, 1222, 1117, 1063, 542 cm<sup>-1</sup>.

- **Compound 2t-Z** (6S,7aS)-8,8-dimethyl-1-((Z)-4,4,4-trifluorobut-2-en-1-yl)hexahydro-3H-3a,6-methanobenzo[c]isothiazole 2,2-dioxide

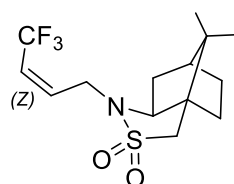

**<sup>1</sup>H NMR (500 MHz, CDCl<sub>3</sub>):** δ 6.26 (dt, *J* = 11.9, 7.0 Hz, 1H), 5.88 – 5.68 (m, 1H), 3.97 (ddt, *J* = 16.6, 6.9, 2.0 Hz, 1H), 3.77 (ddt, *J* = 16.6, 6.9, 2.0 Hz, 1H), 3.15 (s, 2H), 3.15 – 3.10 (m, 1H), 1.99 – 1.93 (m, 1H), 1.93 – 1.81 (m, 3H), 1.65 (dd, *J* = 12.8, 7.9 Hz, 1H), 1.52 – 1.40 (m, 1H), 1.37 – 1.21 (m, 1H), 1.11 (s, 3H), 0.92 (s, 3H).

**<sup>19</sup>F NMR (282 MHz, CDCl<sub>3</sub>):** δ -60.07.

**<sup>13</sup>C NMR (126 MHz, CDCl<sub>3</sub>):** δ 137.5 (q, *J* = 5.1 Hz), 122.9 (q, *J* = 272.0 Hz), 121.1 (q, *J* = 34.3 Hz), 66.9, 50.1, 49.5, 47.8, 44.7, 40.1 (q, *J* = 1.7 Hz), 35.1, 32.3, 22.0, 20.5, 20.1.

**HRMS (ESI-TOF) m/z:** [M+Na]<sup>+</sup> calcd for C<sub>14</sub>H<sub>20</sub>F<sub>3</sub>NaNO<sub>2</sub>S 346.1059; found 346.1056.

**IR (neat):** ν = 2958, 2883, 1719, 1306, 1226, 1130, 1062, 544 cm<sup>-1</sup>.

**Compound 2u** *N,N*-(butane-1,4-diyl)bis(4-methyl-*N*-(4,4,4-trifluorobut-2-en-1-yl)benzenesulfonamide)

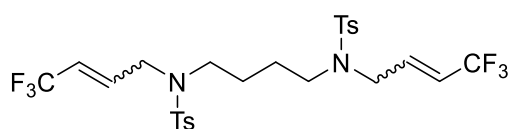

C<sub>26</sub>H<sub>30</sub>F<sub>6</sub>N<sub>2</sub>O<sub>4</sub>S<sub>2</sub>  
MW: 612.65 g.mol<sup>-1</sup>

**2u** was obtained after short work-up and used without further purification.

**Compound 2v** 4-methyl-*N*-(2-(1-oxo-1,2,3,4-tetrahydronaphthalen-2-yl)ethyl)-*N*-(4,4,4-trifluorobut-2-en-1-yl)benzenesulfonamide

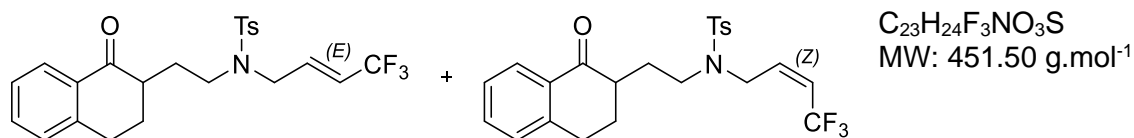

**2v** was obtained after short work-up and used without further purification.

### Enamides **3a-v**

#### **Compound 3a** (*E*)-*N*-benzyl-4-methyl-*N*-(4,4,4-trifluorobut-1-en-1-yl)benzenesulfonamide

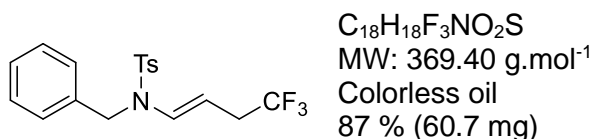

The product was obtained by column chromatography on silica gel using petroleum ether/EtOAc (from 100:0 to 60:40) as eluent.

**<sup>1</sup>H NMR (500 MHz, CDCl<sub>3</sub>):** δ 7.68 (d, *J* = 8.3 Hz, 2H), 7.38 – 7.21 (m, 7H), 6.92 (d, *J* = 14.2 Hz, 1H), 4.54 (dt, *J* = 14.2, 7.5 Hz, 1H), 4.50 (s, 2H), 2.67 (qdd, *J* = 10.4, 7.4, 1.2 Hz, 2H), 2.44 (s, 3H).

**<sup>19</sup>F NMR (471 MHz, CDCl<sub>3</sub>):** δ -67.40.

**<sup>13</sup>C NMR (126 MHz, CDCl<sub>3</sub>):** δ 144.3, 135.8, 135.0, 132.1, 130.1 (x2), 128.8 (x2), 127.7, 127.1 (2), 127.0 (x2), 126.2 (d, *J* = 276.9 Hz), 99.1 (q, *J* = 3.9 Hz), 49.5, 35.3 (q, *J* = 30.5 Hz), 21.7.

**HRMS (ESI-TOF) m/z:** [M+Na]<sup>+</sup> calcd for C<sub>18</sub>H<sub>18</sub>F<sub>3</sub>NNaO<sub>2</sub>S 392.0903; found 392.0895.

**IR (neat):** ν = 2925, 1852, 1662, 1342, 1255, 1166, 1137, 1068, 697, 550 cm<sup>-1</sup>.

#### **Compound 3b** (*E*)-*N*-(benzo[*d*][1,3]dioxol-5-ylmethyl)-4-methyl-*N*-(4,4,4-trifluorobut-1-en-1-yl)benzenesulfonamide

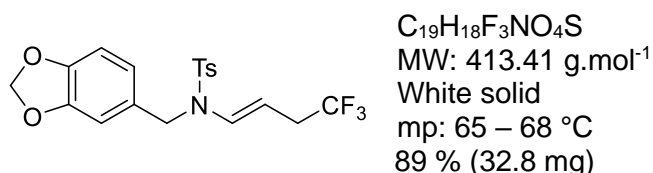

The product was obtained by column chromatography on silica gel using petroleum ether/EtOAc (from 95:05 to 60:40) as eluent.

**<sup>1</sup>H NMR (500 MHz, CDCl<sub>3</sub>):** δ 7.66 (d, *J* = 8.3 Hz, 2H), 7.32 (d, *J* = 8.0 Hz, 2H), 6.89 (d, *J* = 14.2 Hz, 1H), 6.81 – 6.64 (m, 3H), 5.94 (s, 2H), 4.58 (dt, *J* = 14.1, 7.5 Hz, 1H), 4.39 (s, 2H), 2.69 (qdd, *J* = 10.5, 7.5, 1.2 Hz, 2H), 2.44 (s, 3H).

**<sup>19</sup>F NMR (282 MHz, CDCl<sub>3</sub>):** δ -67.35.

**<sup>13</sup>C NMR (126 MHz, CDCl<sub>3</sub>):** δ 148.1, 147.1, 144.2, 135.7, 132.0, 130.0 (x2), 128.7, 127.0 (x2), 125.7 (q, *J* = 275.4 Hz), 120.3, 108.2, 107.5, 101.1, 99.1 (q, *J* = 3.8 Hz), 49.2, 35.2 (q, *J* = 30.5 Hz), 21.6.

**HRMS (ESI-TOF) m/z:** [M+Na]<sup>+</sup> calcd for C<sub>19</sub>H<sub>18</sub>F<sub>3</sub>NNaO<sub>4</sub>S 436.0801; found 436.0794.

**IR (neat):** ν = 2920, 1662, 1491, 1448, 1356, 1245, 1165, 810, 665, 549 cm<sup>-1</sup>.



**Compound 3c** (*E*)-*N*-(4-fluorobenzyl)-4-methyl-*N*-(4,4,4-trifluorobut-1-en-1-yl)benzenesulfonamide

---

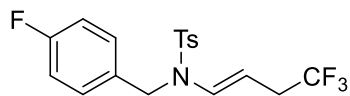

$C_{18}H_{17}F_4NO_2S$   
MW: 387.39 g.mol<sup>-1</sup>  
White solid  
mp: 93 – 95 °C  
89 % (73 mg)

The product was obtained by column chromatography on silica gel using petroleum ether/EtOAc (from 100:00 to 60:40) as eluent.

**<sup>1</sup>H NMR (300 MHz, CDCl<sub>3</sub>):** δ 7.67 (d, *J* = 8.4 Hz, 2H), 7.32 (d, *J* = 8.0 Hz, 2H), 7.28 – 7.17 (m, 2H), 7.04 – 6.93 (m, 2H), 6.91 (d, *J* = 14.2 Hz, 1H), 4.53 (dd, *J* = 14.6, 7.1 Hz, 1H), 4.46 (s, 2H), 2.69 (qdd, *J* = 10.4, 7.5, 1.2 Hz, 2H), 2.44 (s, 3H).

**<sup>19</sup>F NMR (282 MHz, CDCl<sub>3</sub>):** δ -67.40, -114.80.

**<sup>13</sup>C NMR (126 MHz, CDCl<sub>3</sub>):** δ 162.3 (d, *J* = 246.0 Hz), 144.5, 135.7, 132.0, 130.7 (d, *J* = 3.1 Hz), 130.1 (x2), 128.7 (d, *J* = 8.2 Hz) (x2), 127.1 (x2), 125.8 (q, *J* = 276.6 Hz), 115.7 (d, *J* = 21.7 Hz) (x2), 99.2 (q, *J* = 3.7 Hz), 48.8, 35.2 (q, *J* = 30.5 Hz), 21.7.

**HRMS (ESI-TOF) m/z:** [M+K]<sup>+</sup> calcd for C<sub>18</sub>H<sub>17</sub>F<sub>4</sub>KNO<sub>2</sub>S 426.0548; found 426.0541.

**IR (neat):** ν = 3071, 2929, 1661, 1600, 1509, 1359, 1253, 1129, 1067, 811, 635, 509 cm<sup>-1</sup>.

**Compound 3d** (*E*)-*N*-(2-bromobenzyl)-4-methyl-*N*-(4,4,4-trifluorobut-1-en-1-yl)benzenesulfonamide

---

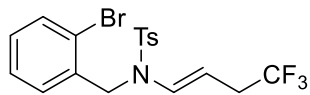

$C_{18}H_{17}BrF_3NO_2S$   
MW: 448.30 g.mol<sup>-1</sup>  
Colorless oil  
80 % (44.2 mg)

The product was obtained by column chromatography on silica gel using petroleum ether/EtOAc (from 95:5 to 60:40) as eluent.

**<sup>1</sup>H NMR (300 MHz, CDCl<sub>3</sub>):** δ 7.71 (d, *J* = 8.3 Hz, 2H), 7.52 (dd, *J* = 7.9, 1.1 Hz, 1H), 7.35 (d, *J* = 7.9 Hz, 2H), 7.32 – 7.22 (m, 2H), 7.18 – 7.08 (m, 1H), 6.97 (d, *J* = 14.2 Hz, 1H), 4.56 (s, 2H), 4.48 – 4.30 (m, 1H), 2.69 (qdd, *J* = 10.4, 7.5, 1.0 Hz, 2H), 2.45 (s, 3H).

**<sup>19</sup>F NMR (282 MHz, CDCl<sub>3</sub>):** δ -67.36.

**<sup>13</sup>C NMR (126 MHz, CDCl<sub>3</sub>):** δ 144.6, 135.7, 133.6, 132.8, 131.8, 130.3 (x2), 129.2, 128.3, 127.9, 127.1 (x2), 125.8 (d, *J* = 278.6 Hz), 122.3, 98.9 (q, *J* = 3.7 Hz), 49.5, 35.2 (q, *J* = 30.5 Hz), 21.8.

**HRMS (ESI-TOF) m/z:** [M+H]<sup>+</sup> calcd for C<sub>18</sub>H<sub>18</sub>BrF<sub>3</sub>NO<sub>2</sub>S 448.0188; found 448.0187.

**IR (neat):** ν = 3036, 2960, 1662, 1597, 1442, 1362, 1276, 1255, 1167, 1138, 1046, 665 cm<sup>-1</sup>.

**Compound 3e** (*E*)-*N*,4-dimethyl-*N*-(4,4,4-trifluorobut-1-en-1-yl)benzenesulfonamide

---

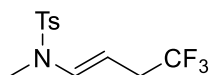

$C_{12}H_{14}F_3NO_2S$   
MW: 293.30 g.mol<sup>-1</sup>  
Colorless oil  
89 % (53.6 mg)

The product was obtained by column chromatography on silica gel using petroleum ether/EtOAc (from 95:05 to 60:40) as eluent.

**<sup>1</sup>H NMR (500 MHz, CDCl<sub>3</sub>):** δ 7.62 (d, *J* = 8.3 Hz, 2H), 7.31 (d, *J* = 8.5 Hz, 2H), 6.98 (d, *J* = 14.1 Hz, 1H), 4.58 (dt, *J* = 14.0, 7.5 Hz, 1H), 2.86 (s, 3H), 2.85 – 2.73 (m, 2H), 2.42 (s, 3H).

**<sup>19</sup>F NMR (282 MHz, CDCl<sub>3</sub>):** δ -67.34.

**<sup>13</sup>C NMR (126 MHz, CDCl<sub>3</sub>):** δ 144.3, 134.5, 133.8, 130.0 (x2), 127.1 (x2), 126.0 (q, *J* = 276.5 Hz), 97.6 (q, *J* = 3.8 Hz), 35.2 (q, *J* = 30.5 Hz), 32.1, 21.7.

**HRMS (ESI-TOF) m/z:** [M+Na]<sup>+</sup> calcd for C<sub>12</sub>H<sub>14</sub>F<sub>3</sub>NNaO<sub>2</sub>S 316.0590; found 316.0581.

**IR (neat):** ν = 3064, 2931, 1662, 1598, 1356, 1335, 1276, 1248, 1162, 1137, 769, 665, 548 cm<sup>-1</sup>.

**Compound 3f** (*E*)-*N*-cyclopropyl-4-methyl-*N*-(4,4,4-trifluorobut-1-en-1-yl)benzenesulfonamide

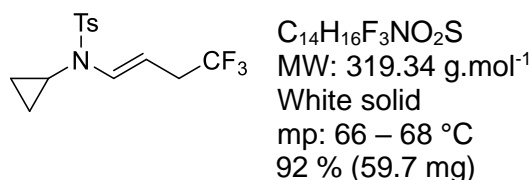

The product was obtained by column chromatography on silica gel using petroleum ether/EtOAc (from 95:05 to 60:40) as eluent.

**<sup>1</sup>H NMR (300 MHz, CDCl<sub>3</sub>):** δ 7.68 (d, *J* = 8.3 Hz, 2H), 7.32 (d, *J* = 7.9 Hz, 2H), 6.87 (d, *J* = 14.1 Hz, 1H), 5.00 (dt, *J* = 14.1, 7.6 Hz, 1H), 2.80 (qdd, *J* = 10.5, 7.6, 1.2 Hz, 2H), 2.43 (d, *J* = 0.8 Hz, 3H), 1.76 (tt, *J* = 6.7, 3.7 Hz, 1H), 1.01 – 0.79 (m, 4H).

**<sup>19</sup>F NMR (282 MHz, CDCl<sub>3</sub>):** δ -67.27.

**<sup>13</sup>C NMR (126 MHz, CDCl<sub>3</sub>):** δ 144.3, 134.7, 134.2, 129.8 (x2), 127.6 (x2), 126.0 (q, *J* = 276.5 Hz), 100.8 (q, *J* = 3.7 Hz), 35.3 (q, *J* = 30.5 Hz), 27.0, 21.7, 8.2 (x2).

**HRMS (ESI-TOF) m/z:** [M+Na]<sup>+</sup> calcd for C<sub>14</sub>H<sub>16</sub>F<sub>3</sub>NNaO<sub>2</sub>S 342.0746; found 342.0746.

**IR (neat):** ν = 3087, 2931, 1658, 1598, 1365, 1257, 1186, 1125, 664, 601, 551 cm<sup>-1</sup>.

**Compound 3g** (*E*)-*N*-cyclopentyl-4-methyl-*N*-(4,4,4-trifluorobut-1-en-1-yl)benzenesulfonamide

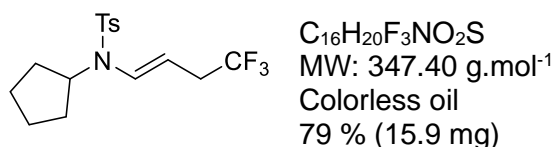

The product was obtained by column chromatography on silica gel using petroleum ether/EtOAc (from 95:05 to 60:40) as eluent.

**<sup>1</sup>H NMR (300 MHz, CDCl<sub>3</sub>):** δ 7.66 (d, *J* = 8.3 Hz, 2H), 7.29 (d, *J* = 7.9 Hz, 2H), 6.37 (d, *J* = 14.4 Hz, 1H), 5.16 (dt, *J* = 14.5, 7.5 Hz, 1H), 4.46 (p, *J* = 8.7 Hz, 1H), 2.80 (qdd, *J* = 10.5, 7.5, 1.2 Hz, 2H), 2.42 (s, 3H), 1.70 – 1.59 (m, 6H), 1.54 – 1.40 (m, 2H).

**<sup>19</sup>F NMR (282 MHz, CDCl<sub>3</sub>):** δ -66.99.

**<sup>13</sup>C NMR (126 MHz, CDCl<sub>3</sub>):** δ 143.8, 136.8, 129.7 (x2), 129.1, 127.1 (x2), 123.6 (q, *J* = 279.2 Hz), 105.4 (q, *J* = 3.5 Hz), 58.6, 35.9 (q, *J* = 30.4 Hz), 27.5 (x2), 24.4 (x2), 21.6.

**HRMS (ESI-TOF) m/z:** [M+K]<sup>+</sup> calcd for C<sub>16</sub>H<sub>20</sub>F<sub>3</sub>KNO<sub>2</sub>S 386.0798; found 386.0801.

**IR (neat):** ν = 2960, 1875, 1660, 1340, 1273, 1252, 1160, 1137, 1091, 1064, 666, 548 cm<sup>-1</sup>.

**Compound 3h** (*E*)-4-methyl-*N*-(4,4,4-trifluorobut-1-en-1-yl)-*N*-(2,2,2-trifluoroethyl)benzenesulfonamide

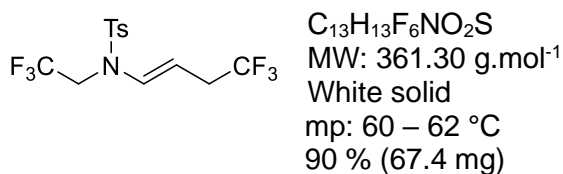

The product was obtained by column chromatography on silica gel using petroleum ether/EtOAc (from 95:05 to 60:40) as eluent.

**<sup>1</sup>H NMR (300 MHz, CDCl<sub>3</sub>):** δ 7.67 (d, *J* = 8.4 Hz, 2H), 7.34 (d, *J* = 8.0 Hz, 2H), 6.75 (d, *J* = 14.2 Hz, 1H), 4.94 (dt, *J* = 14.6, 7.4 Hz, 1H), 4.01 (q, *J* = 8.3 Hz, 2H), 2.80 (qdd, *J* = 10.3, 7.5, 1.1 Hz, 2H), 2.44 (s, 3H).

**<sup>19</sup>F NMR (282 MHz, CDCl<sub>3</sub>):** δ -67.15, -68.53.

**<sup>13</sup>C NMR (126 MHz, CDCl<sub>3</sub>):** δ 145.1, 135.2, 132.0, 130.2 (x2), 127.3 (x2), 125.7 (q, *J* = 278.1 Hz), 123.7 (q, *J* = 281.1 Hz), 101.1 (m), 47.1 (q, *J* = 36.2 Hz), 35.2 (q, *J* = 30.7 Hz), 21.7.

**HRMS (ESI-TOF) m/z:** [M+Na]<sup>+</sup> calcd for C<sub>13</sub>H<sub>13</sub>F<sub>6</sub>NNaO<sub>2</sub>S 384.0463; found 384.0462.

**IR (neat):** ν = 2937, 1667, 1599, 1364, 1332, 1271, 1257, 1164, 1069, 1010, 666, 547 cm<sup>-1</sup>.

**Compound 3i** (*E*)-*N*-allyl-4-methyl-*N*-(4,4,4-trifluorobut-1-en-1-yl)benzenesulfonamide

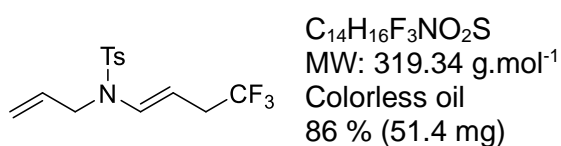

The product was obtained by column chromatography on silica gel using petroleum ether/EtOAc (from 95:05 to 60:40) as eluent.

**<sup>1</sup>H NMR (500 MHz, CDCl<sub>3</sub>):** δ 7.66 (d, *J* = 8.3 Hz, 2H), 7.31 (d, *J* = 8.3 Hz, 2H), 6.88 (d, *J* = 14.2 Hz, 1H), 5.60 (ddt, *J* = 17.2, 10.5, 5.3 Hz, 1H), 5.20 – 5.14 (m, 1H), 5.14 (t, *J* = 1.3 Hz, 1H), 4.67 (dt, *J* = 14.5, 7.4 Hz, 1H), 3.99 (dt, *J* = 5.3, 1.7 Hz, 2H), 2.77 (qdd, *J* = 10.5, 7.5, 1.2 Hz, 2H), 2.43 (s, 3H).

**<sup>19</sup>F NMR (282 MHz, CDCl<sub>3</sub>):** δ -67.37.

**<sup>13</sup>C NMR (126 MHz, CDCl<sub>3</sub>):** δ 144.3, 136.1, 131.9, 131.2, 130.0 (x2), 127.1 (x2), 126.0 (q, *J* = 276.5 Hz), 118.2, 98.2 (q, *J* = 3.8 Hz), 48.2, 35.3 (q, *J* = 30.5 Hz), 21.7.

**HRMS (ESI-TOF) m/z:** [M+K]<sup>+</sup> calcd for C<sub>14</sub>H<sub>16</sub>F<sub>3</sub>KNO<sub>2</sub>S 359.0485; found 358.0476.

**IR (neat):**  $\nu = 3070, 2929, 2874, 1662, 1598, 1357, 1274, 1254, 1164, 1133, 1089, 1067, 889, 814, 665, 593, 547 \text{ cm}^{-1}$ .

**Compound 3j** (*E*)-4-methyl-*N*-(pent-4-en-1-yl)-*N*-(4,4,4-trifluorobut-1-en-1-yl)benzenesulfonamide

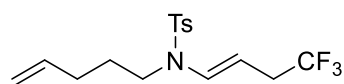

$\text{C}_{16}\text{H}_{20}\text{F}_3\text{NO}_2\text{S}$   
MW: 347.40 g.mol<sup>-1</sup>  
Colorless oil  
88 % (61.8 mg)

The product was obtained by column chromatography on silica gel using petroleum ether/EtOAc (from 95:05 to 60:40) as eluent.

**<sup>1</sup>H NMR (300 MHz, CDCl<sub>3</sub>):**  $\delta$  7.63 (d,  $J = 8.3$  Hz, 2H), 7.30 (d,  $J = 7.9$  Hz, 2H), 6.85 (d,  $J = 14.3$  Hz, 1H), 5.76 (ddt,  $J = 16.9, 10.2, 6.6$  Hz, 1H), 5.09 – 4.92 (m, 2H), 3.35 – 3.22 (m, 2H), 2.80 (qdd,  $J = 10.4, 7.5, 1.2$  Hz, 2H), 2.42 (s, 3H), 2.15 – 1.93 (m, 2H), 1.74 – 1.58 (m, 2H), 1.29 – 1.22 (m, 1H).

**<sup>19</sup>F NMR (282 MHz, CDCl<sub>3</sub>):**  $\delta$  -67.33.

**<sup>13</sup>C NMR (126 MHz, CDCl<sub>3</sub>):**  $\delta$  144.1, 137.3, 136.0, 132.1, 130.0 (x2), 127.0 (x2), 126.0 (q,  $J = 276.6$  Hz), 115.8, 97.4 (q,  $J = 3.8$  Hz), 45.0, 35.4 (q,  $J = 30.5$  Hz), 30.9, 25.9, 21.7.

**HRMS (ESI-TOF) m/z:** [M+K]<sup>+</sup> calcd for C<sub>16</sub>H<sub>20</sub>F<sub>3</sub>KNO<sub>2</sub>S 386.0790; found 386.0790.

**IR (neat):**  $\nu = 3081, 2828, 2857, 1661, 1358, 1341, 1307, 1276, 1186, 1138, 1091, 7071, 951, 911, 814, 665, 596, 560 \text{ cm}^{-1}$ .

**Compound 3k** (*E*)-*N*-(4-cyanobutyl)-4-methyl-*N*-(4,4,4-trifluorobut-1-en-1-yl)benzenesulfonamide

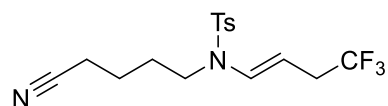

$\text{C}_{16}\text{H}_{19}\text{F}_3\text{N}_2\text{O}_2\text{S}$   
MW: 360.40 g.mol<sup>-1</sup>  
Colorless oil  
82 % (57.4 mg)

The product was obtained by column chromatography on silica gel using petroleum ether/EtOAc (from 95:05 to 60:40) as eluent.

**<sup>1</sup>H NMR (300 MHz, CDCl<sub>3</sub>):**  $\delta$  7.62 (d,  $J = 8.4$  Hz, 2H), 7.31 (d,  $J = 8.0$  Hz, 2H), 6.83 (d,  $J = 14.3$  Hz, 1H), 4.67 (dt,  $J = 14.6, 7.5$  Hz, 1H), 3.38 – 3.28 (m, 2H), 2.81 (qdd,  $J = 10.4, 7.5, 1.2$  Hz, 2H), 2.43 (s, 5H), 1.77 – 1.69 (m, 4H).

**<sup>19</sup>F NMR (282 MHz, CDCl<sub>3</sub>):**  $\delta$  -67.25.

**<sup>13</sup>C NMR (126 MHz, CDCl<sub>3</sub>):**  $\delta$  144.3, 135.4, 131.8, 130.0 (x2), 126.9 (x2), 125.4 (q,  $J = 274.4$  Hz), 119.2, 98.4 (q,  $J = 3.7$  Hz), 44.2, 35.2 (q,  $J = 30.5$  Hz), 25.3, 22.3, 21.6, 16.7.

**HRMS (ESI-TOF) m/z:** [M+Na]<sup>+</sup> calcd for C<sub>16</sub>H<sub>19</sub>F<sub>3</sub>N<sub>2</sub>NaO<sub>2</sub>S 383.1012; found 383.1008.

**IR (neat):**  $\nu = 3060, 2944, 2876, 1661, 1598, 1340, 1255, 1162, 1099, 1063, 665, 597, 549 \text{ cm}^{-1}$ .

**Compound 3l** (*E*)-*N*-(2-chloroethyl)-4-methyl-*N*-(4,4,4-trifluorobut-1-en-1-yl)benzenesulfonamide

---

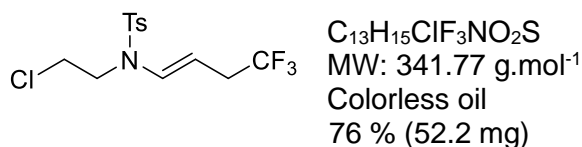

The product was obtained by column chromatography on silica gel using petroleum ether/EtOAc (from 95:05 to 60:40) as eluent.

**<sup>1</sup>H NMR (300 MHz, CDCl<sub>3</sub>):** δ 7.66 (d, *J* = 8.4 Hz, 2H), 7.33 (d, *J* = 8.5 Hz, 2H), 6.84 (d, *J* = 14.3 Hz, 1H), 4.74 (dt, *J* = 14.2, 7.4 Hz, 1H), 3.59 (s, 4H), 2.81 (qdd, *J* = 10.4, 7.5, 1.2 Hz, 2H), 2.44 (s, 3H).

**<sup>19</sup>F NMR (282 MHz, CDCl<sub>3</sub>):** δ -67.21.

**<sup>13</sup>C NMR (126 MHz, CDCl<sub>3</sub>):** δ 144.7, 135.4, 131.9, 130.2 (x2), 127.1 (x2), 125.8 (q, *J* = 276.5 Hz), 97.7 (q, *J* = 3.8 Hz), 46.7, 39.2, 35.2 (q, *J* = 30.6 Hz), 21.7.

**HRMS (ESI-TOF) m/z:** [M+H]<sup>+</sup> calcd for C<sub>13</sub>H<sub>16</sub>ClF<sub>3</sub>NO<sub>2</sub>S 342.0537; found 342.0529.

**IR (neat):** ν = 3057, 2971n 1662, 1598, 1365, 1339, 1276n 1255, 1187, 1139, 1074, 905, 664, 549 cm<sup>-1</sup>.

**Compound 3m** (*E*)-4-methyl-*N*-(pyridin-3-ylmethyl)-*N*-(4,4,4-trifluorobut-1-en-1-yl)benzenesulfonamide

---

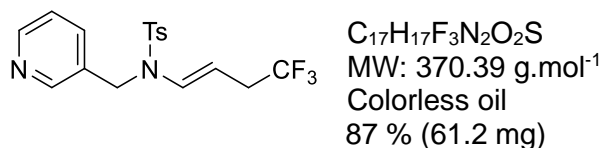

The product was obtained by column chromatography on silica gel using petroleum ether/EtOAc (from 95:05 to 60:40) as eluent.

**<sup>1</sup>H NMR (500 MHz, CDCl<sub>3</sub>):** δ 8.50 (d, *J* = 20.9 Hz, 2H), 7.67 (d, *J* = 8.4 Hz, 2H), 7.64 (d, *J* = 7.9 Hz, 1H), 7.33 (d, *J* = 8.0 Hz, 2H), 7.28 – 7.22 (m, 1H), 6.92 (d, *J* = 14.3 Hz, 1H), 4.58 – 4.43 (m, 3H), 2.69 (qdd, *J* = 10.4, 7.5, 1.1 Hz, 2H), 2.44 (s, 3H).

**<sup>19</sup>F NMR (282 MHz, CDCl<sub>3</sub>):** δ -67.36.

**<sup>13</sup>C NMR (126 MHz, CDCl<sub>3</sub>):** δ 149.3, 148.6, 144.7, 135.5, 135.5, 134.8, 131.8, 130.2 (x2), 123.8, 127.1 (x2), 125.7 (q, *J* = 276.6 Hz), 99.4 (q, *J* = 3.7 Hz), 47.0, 35.2 (q, *J* = 30.6 Hz), 21.7.

**HRMS (ESI-TOF) m/z:** [M+H]<sup>+</sup> calcd for C<sub>17</sub>H<sub>18</sub>F<sub>3</sub>N<sub>2</sub>O<sub>2</sub>S 371.1036; found 371.1031.

**IR (neat):** ν = 3079, 2930, 1661, 1429, 1363, 1275, 1255, 1166, 1138, 1071, 666 cm<sup>-1</sup>.

**Compound 3n** (*E*)-*N*-benzyl-4-methyl-*N*-(4,4,4-trifluoro-3-phenylbut-1-en-1-yl)benzenesulfonamide

---

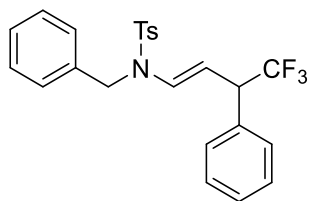

$C_{24}H_{22}F_3NO_2S$   
 MW: 445.50 g.mol<sup>-1</sup>  
 Colorless oil  
 86 % (10.4 mg)

The product was obtained by column chromatography on silica gel using petroleum ether/EtOAc (from 100:00 to 60:40) as eluent.

**<sup>1</sup>H NMR (400 MHz, CDCl<sub>3</sub>):** δ 7.64 (d, *J* = 8.3 Hz, 2H), 7.29 – 7.20 (m, 10H), 7.03 – 6.96 (m, 2H), 6.90 (d, *J* = 14.2 Hz, 1H), 4.92 (dd, *J* = 14.2, 8.8 Hz, 1H), 4.64 (d, *J* = 15.9 Hz, 1H), 4.46 (d, *J* = 15.9 Hz, 1H), 3.86 (p, *J* = 9.1 Hz, 1H), 2.44 (s, 3H).

**<sup>19</sup>F NMR (282 MHz, CDCl<sub>3</sub>):** δ -69.97.

**<sup>13</sup>C NMR (126 MHz, CDCl<sub>3</sub>):** δ 144.3, 135.8, 135.0, 134.9, 131.1, 130.1 (x2), 129.4, 128.8 (x2), 128.8 (x2), 128.7 (x2), 128.2 (d, *J* = 65.5 Hz), 127.1 (x2), 127.1 (x2), 123.7 (q, *J* = 270.7 Hz), 105.4 (d, *J* = 2.9 Hz), 51.1 (q, *J* = 28.1 Hz), 49.6, 21.7.

**HRMS (ESI-TOF) m/z:** [M+K]<sup>+</sup> calcd for C<sub>24</sub>H<sub>22</sub>F<sub>3</sub>KNO<sub>2</sub>S 484.0955; found 484.0941.

**IR (neat):** ν = 3090, 2957, 2872, 2357, 1659, 1520, 1455, 1363, 1250, 1165, 1107, 948, 738, 701, 666, 572 cm<sup>-1</sup>.

**Compound 3o** (*E*)-*N*-phenethyl-*N*-(4,4,4-trifluorobut-1-en-1-yl)methanesulfonamide

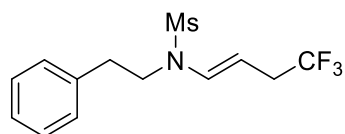

$C_{13}H_{16}F_3NO_2S$   
 MW: 307.33 g.mol<sup>-1</sup>  
 White solid  
 mp: 88 – 90 °C  
 69 % (32.2 mg)

The product was obtained by column chromatography on silica gel using petroleum ether/EtOAc (from 95:05 to 60:40) as eluent.

**<sup>1</sup>H NMR (300 MHz, CDCl<sub>3</sub>):** δ 7.37 – 7.20 (m, 5H), 6.69 (d, *J* = 14.0 Hz, 1H), 4.84 (dt, *J* = 14.3, 7.4 Hz, 1H), 3.83 – 3.67 (m, 2H), 2.99 – 2.93 (m, 2H), 2.84 (qdd, *J* = 10.4, 7.5, 1.2 Hz, 2H), 2.72 (s, 3H).

**<sup>19</sup>F NMR (282 MHz, CDCl<sub>3</sub>):** δ -67.25.

**<sup>13</sup>C NMR (126 MHz, CDCl<sub>3</sub>):** δ 138.0, 131.3, 129.0 (x2), 129.0 (x2), 127.1, 126.0 (d, *J* = 274.4 Hz), 97.3 (q, *J* = 3.8 Hz), 47.3, 39.6, 35.4 (q, *J* = 30.6 Hz), 33.6.

**HRMS (ESI-TOF) m/z:** [M+Na]<sup>+</sup> calcd for C<sub>13</sub>H<sub>16</sub>F<sub>3</sub>NNaO<sub>2</sub>S 330.0746; found 330.0744.

**IR (neat):** ν = 3089, 3062, 3005, 2936, 1664, 1331, 1254, 1132, 1087, 967, 738, 700, 519 cm<sup>-1</sup>.

**Compound 3p** (*E*)-*N*-benzyl-*N*-(4,4,4-trifluorobut-1-en-1-yl)cyclopropanesulfonamide

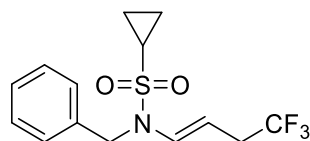

$C_{14}H_{16}F_3NO_2S$   
 MW: 319.34 g.mol<sup>-1</sup>  
 Colorless oil  
 79 % (55.5 mg)

The product was obtained by column chromatography on silica gel using petroleum ether/EtOAc (from 95:05 to 60:40) as eluent.

**<sup>1</sup>H NMR (300 MHz, CDCl<sub>3</sub>):** δ 7.42 – 7.19 (m, 5H), 6.80 (d, *J* = 14.2 Hz, 1H), 4.76 (s, 2H), 4.64 (dt, *J* = 14.3, 7.5 Hz, 1H), 2.70 (qdd, *J* = 10.5, 7.5, 1.1 Hz, 2H), 2.37 (tt, *J* = 8.0, 4.9 Hz, 1H), 1.31 – 1.14 (m, 2H), 1.11 – 0.91 (m, 2H).

**<sup>19</sup>F NMR (282 MHz, CDCl<sub>3</sub>):** δ -67.39.

**<sup>13</sup>C NMR (126 MHz, CDCl<sub>3</sub>):** δ 135.4, 132.3, 128.8 (x2), 127.8, 126.9 (x2), 125.9 (q, *J* = 276.5 Hz), 97.8 (q, *J* = 3.8 Hz), 49.7, 35.2 (q, *J* = 30.5 Hz), 30.6, 5.7 (x2).

**HRMS (ESI-TOF) *m/z*:** [M+Na]<sup>+</sup> calcd for C<sub>14</sub>H<sub>16</sub>F<sub>3</sub>NaNO<sub>2</sub>S 342.0746; found 342.0744.

**IR (neat):** ν = 3065, 2931, 1662, 1340, 1275, 1253, 1127, 1066, 946, 882, 696, 602, 541 cm<sup>-1</sup>.

**Compound 3q** (*E*)-*N*-benzyl-4-nitro-*N*-(4,4,4-trifluorobut-1-en-1-yl)benzenesulfonamide

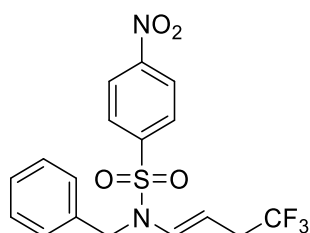

C<sub>17</sub>H<sub>15</sub>F<sub>3</sub>N<sub>2</sub>O<sub>4</sub>S  
MW: 400.37 g.mol<sup>-1</sup>  
Colorless oil  
75 % (59.6 mg)

The product was obtained by column chromatography on silica gel using petroleum ether/EtOAc (from 95:05 to 60:40) as eluent.

**<sup>1</sup>H NMR (300 MHz, CDCl<sub>3</sub>):** δ 8.35 (d, *J* = 9.1 Hz, 2H), 7.94 (d, *J* = 9.1 Hz, 2H), 7.50 – 7.17 (m, 5H), 6.90 (d, *J* = 14.3 Hz, 1H), 4.73 (dt, *J* = 14.2, 7.5 Hz, 1H), 4.60 (s, 2H), 2.72 (qdd, *J* = 10.4, 7.5, 1.2 Hz, 2H).

**<sup>19</sup>F NMR (282 MHz, CDCl<sub>3</sub>):** δ -67.26.

**<sup>13</sup>C NMR (126 MHz, CDCl<sub>3</sub>):** δ 150.5, 144.3, 134.1, 131.3, 128.9 (x2), 128.3 (x2), 128.1, 127.1 (x2), 125.6 (q, *J* = 280.2 Hz), 124.7 (x2), 101.4 (q, *J* = 3.8 Hz), 49.8, 35.2 (q, *J* = 30.6 Hz).

**HRMS (ESI-TOF) *m/z*:** [M+H]<sup>+</sup> calcd for C<sub>17</sub>H<sub>16</sub>F<sub>3</sub>N<sub>2</sub>O<sub>4</sub>S 401.0777; found 401.0777.

**IR (neat):** ν = 3107, 1663, 1532, 1350, 1254, 1170, 1137, 1090, 1068, 950, 855, 737, 684, 618, 545, 463 cm<sup>-1</sup>.

**Compound 3r** (*E*)-*N*-benzyl-*N*-(4,4,4-trifluorobut-1-en-1-yl)thiophene-2-sulfonamide

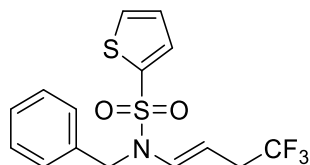

C<sub>15</sub>H<sub>14</sub>F<sub>3</sub>NO<sub>2</sub>S<sub>2</sub>  
MW: 361.40 g.mol<sup>-1</sup>  
Colorless oil  
85 % (51.2 mg)

The product was obtained by column chromatography on silica gel using petroleum ether/EtOAc (from 95:05 to 60:40) as eluent.

**<sup>1</sup>H NMR (500 MHz, CDCl<sub>3</sub>):** δ 7.64 (dd, *J* = 5.0, 1.4 Hz, 1H), 7.58 (dd, *J* = 3.8, 1.3 Hz, 1H), 7.35 – 7.23 (m, 5H), 7.11 (dd, *J* = 5.0, 3.8 Hz, 1H), 6.88 (d, *J* = 14.2 Hz, 1H), 4.65 (dt, *J* = 14.4, 7.5 Hz, 1H), 4.58 (s, 2H), 2.70 (qdd, *J* = 10.4, 7.5, 1.0 Hz, 2H).

**<sup>19</sup>F NMR (282 MHz, CDCl<sub>3</sub>):** δ -67.31.

**<sup>13</sup>C NMR (126 MHz, CDCl<sub>3</sub>):** δ 139.0, 134.8, 132.8, 132.6, 131.6, 128.9 (x2), 127.9, 127.7, 127.0 (x2), 125.6 (q, *J* = 277.0 Hz), 100.6 (q, *J* = 3.8 Hz), 49.8, 35.3 (q, *J* = 30.6 Hz).

**HRMS (ESI-TOF) m/z:** [M+K]<sup>+</sup> calcd for C<sub>15</sub>H<sub>14</sub>F<sub>3</sub>KNO<sub>2</sub>S<sub>2</sub> 400.0050; found 400.0039.

**IR (neat):**  $\nu$  = 3165, 3068, 1663, 1367, 1344, 1276, 1255, 1164, 1138, 1070, 697, 607, 576 cm<sup>-1</sup>.

**Compound 3s** (*E*)-2-(4,4,4-trifluorobut-1-en-1-yl)-2,3-dihydrobenzo[*d*]isothiazole 1,1-dioxide

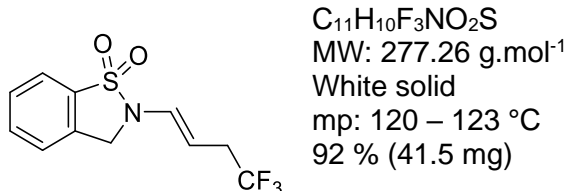

The product was obtained by column chromatography on silica gel using petroleum ether/EtOAc (from 95:05 to 60:40) as eluent.

**<sup>1</sup>H NMR (300 MHz, CDCl<sub>3</sub>):**  $\delta$  7.89 – 7.80 (m, 1H), 7.73 – 7.62 (m, 1H), 7.64 – 7.53 (m, 1H), 7.52 – 7.43 (m, 1H), 6.80 (d, *J* = 14.0 Hz, 1H), 4.90 (dt, *J* = 13.9, 7.4 Hz, 1H), 4.61 (s, 2H), 2.90 (qdd, *J* = 10.5, 7.4, 1.2 Hz, 2H).

**<sup>19</sup>F NMR (282 MHz, CDCl<sub>3</sub>):**  $\delta$  -67.14.

**<sup>13</sup>C NMR (126 MHz, CDCl<sub>3</sub>):**  $\delta$  134.3, 133.6, 132.0, 129.7, 127.2, 125.9 (d, *J* = 296.4 Hz), 124.8, 121.8, 98.2 (q, *J* = 3.9 Hz), 47.6, 35.4 (q, *J* = 30.7 Hz).

**HRMS (ESI-TOF) m/z:** [M+Na]<sup>+</sup> calcd for C<sub>11</sub>H<sub>10</sub>F<sub>3</sub>NNaO<sub>2</sub>S 300.0277; found 300.0275.

**IR (neat):**  $\nu$  = 2928, 2868, 1668, 1307, 1282, 1214, 1172, 1162, 1128, 1065 cm<sup>-1</sup>.

**Compound 3t** (6*S*,7*aS*)-8,8-dimethyl-1-((*E*)-4,4,4-trifluorobut-1-en-1-yl)hexahydro-3*H*-3*a*,6-methanobenzo[*c*]isothiazole 2,2-dioxide

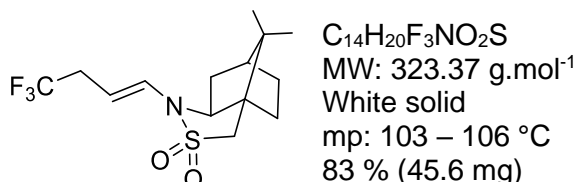

The product was obtained by column chromatography on silica gel using petroleum ether/EtOAc (from 95:05 to 60:40) as eluent.

**<sup>1</sup>H NMR (300 MHz, CDCl<sub>3</sub>):**  $\delta$  6.32 (d, *J* = 14.1 Hz, 1H), 4.81 (ddd, *J* = 14.5, 8.0, 6.9 Hz, 1H), 3.41 (dd, *J* = 7.8, 4.8 Hz, 1H), 3.25 (d, *J* = 3.3 Hz, 2H), 2.95 – 2.69 (m, 2H), 2.15 – 2.01 (m, 1H), 1.96 – 1.89 (m, 3H), 1.87 – 1.76 (m, 1H), 1.54 – 1.44 (m, 1H), 1.39 – 1.31 (m, 1H), 1.08 (s, 3H), 0.95 (s, 3H).

**<sup>19</sup>F NMR (282 MHz, CDCl<sub>3</sub>):**  $\delta$  -67.14.

**<sup>13</sup>C NMR (126 MHz, CDCl<sub>3</sub>):**  $\delta$  126.7, 125.9 (q, *J* = 276.5 Hz), 102.2 (q, *J* = 3.7 Hz), 63.9, 50.4, 49.8, 48.1, 44.6, 36.0, 35.6 (q, *J* = 30.6 Hz), 32.2, 27.0, 20.3, 20.1.

**HRMS (ESI-TOF) m/z:** [M+Na]<sup>+</sup> calcd for C<sub>14</sub>H<sub>20</sub>F<sub>3</sub>NNaO<sub>2</sub>S 346.1059; found 346.1054.

**IR (neat):**  $\nu$  = 2959, 2884, 1664, 1321, 1253, 1136, 1068 cm<sup>-1</sup>.



**Compound 3u** 4-methyl-*N*-(4-((4-methyl-*N*-((*E*)-4,4,4-trifluorobut-1-en-1-yl)phenyl)sulfonamido)butyl)-*N*-((*E*)-4,4,4-trifluorobut-1-en-1-yl)benzenesulfonamide

---

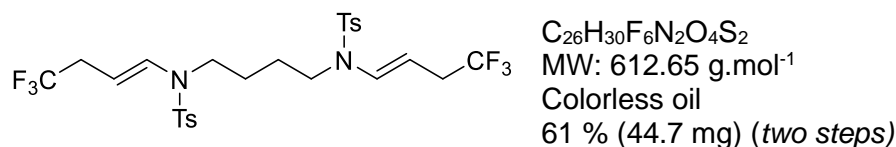

This compound was obtained through a sequential two steps procedure from **1u**.

The product was obtained by column chromatography on silica gel using petroleum ether/EtOAc (from 95:05 to 60:40) as eluent.

**<sup>1</sup>H NMR (300 MHz, CDCl<sub>3</sub>):** δ 7.63 (d, *J* = 8.3 Hz, 4H), 7.31 (d, *J* = 8.5 Hz, 4H), 6.80 (d, *J* = 14.3 Hz, 2H), 4.66 (dt, *J* = 14.6, 7.5 Hz, 2H), 3.35 – 3.24 (m, 4H), 2.80 (qdd, *J* = 10.4, 7.4, 1.1 Hz, 4H), 2.43 (s, 6H), 1.66 – 1.57 (m, 4H).

**<sup>19</sup>F NMR (282 MHz, CDCl<sub>3</sub>):** δ -67.27.

**<sup>13</sup>C NMR (126 MHz, CDCl<sub>3</sub>):** δ 144.3 (x2), 135.7 (x2), 132.0 (x2), 130.1 (x4), 127.0 (x4), 126.0 (q, *J* = 276.5 Hz) (x2), 98.4 (q, *J* = 3.7 Hz) (x2), 44.7 (x2), 35.3 (q, *J* = 30.5 Hz) (x2), 23.5 (x2), 21.7 (x2).

**HRMS (ESI-TOF) m/z:** [M+H]<sup>+</sup> calcd for C<sub>26</sub>H<sub>31</sub>F<sub>6</sub>N<sub>2</sub>O<sub>4</sub>S<sub>2</sub> 613.1624; found 613.1626.

**IR (neat):** ν = 3089, 2931, 2882, 1661, 1339, 1253, 1163, 1063, 890, 846, 814, 664, 595, 548 cm<sup>-1</sup>.

**Compound 3v** (*E*)-4-methyl-*N*-(2-(1-oxo-1,2,3,4-tetrahydronaphthalen-2-yl)ethyl)-*N*-(4,4,4-trifluorobut-1-en-1-yl)benzenesulfonamide

---

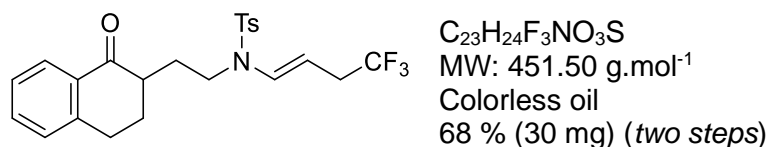

This compound was obtained through a sequential two steps procedure from **1v**.

The product was obtained by column chromatography on silica gel using petroleum ether/EtOAc (from 95:05 to 60:40) as eluent.

**<sup>1</sup>H NMR (500 MHz, CDCl<sub>3</sub>):** δ 7.99 (dd, *J* = 7.8, 1.5 Hz, 1H), 7.64 (d, *J* = 8.3 Hz, 2H), 7.46 (td, *J* = 7.5, 1.5 Hz, 1H), 7.36 – 7.26 (m, 3H), 7.23 (d, *J* = 7.6 Hz, 1H), 6.86 (d, *J* = 14.3 Hz, 1H), 4.96 (dt, *J* = 14.7, 7.5 Hz, 1H), 3.59 – 3.50 (m, 1H), 3.51 – 3.41 (m, 1H), 3.14 – 2.94 (m, 2H), 2.89 – 2.76 (m, 2H), 2.62 – 2.51 (m, 1H), 2.41 (s, 3H), 2.32 – 2.16 (m, 2H), 1.97 – 1.85 (m, 1H), 1.77 – 1.65 (m, 1H).

**<sup>19</sup>F NMR (282 MHz, CDCl<sub>3</sub>):** δ -67.20.

**<sup>13</sup>C NMR (126 MHz, CDCl<sub>3</sub>):** δ 120.0, 144.2, 144.0, 135.9, 133.5, 132.6, 132.0, 130.0 (x2), 128.9, 128.9 (d, *J* = 265.6 Hz), 127.5, 127.0 (x2), 126.8, 98.2 (q, *J* = 4.0 Hz), 45.4, 43.9, 35.4 (d, *J* = 30.3 Hz), 29.7, 29.3, 27.8, 21.7.

**HRMS (ESI-TOF) m/z:** [M+K]<sup>+</sup> calcd for C<sub>23</sub>H<sub>24</sub>F<sub>3</sub>KNO<sub>3</sub>S 490.1061; found 490.1050.

**IR (neat):** ν = 3072, 2930, 1681, 2661, 1600, 1342, 1276, 1255, 1186, 1136 cm<sup>-1</sup>.

## Terminal *N*-allenamide 4

**Compound 4** *N*-benzyl-4-methyl-*N*-(propa-1,2-dien-1-yl)benzenesulfonamide Erreur ! Signet non défini.

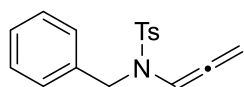

$C_{17}H_{17}NO_2S$   
MW: 299.39 g.mol<sup>-1</sup>  
Colorless oil  
66 %

The product was obtained by column chromatography on silica gel using Petroleum ether / EtOAc (from 100:0 to 95:05) as eluent.

**<sup>1</sup>H NMR (300 MHz, CDCl<sub>3</sub>):**  $\delta$  = 7.68 (d, *J* = 8.3 Hz, 2H), 7.30 – 7.20 (m, 7H), 6.79 (t, *J* = 6.2 Hz, 1H), 5.10 (d, *J* = 6.2 Hz, 2H), 4.26 (s, 2H), 2.41 (s, 3H).

*This analytical data match with those described in the literature.*

## Various syntheses 5-7

**Compound 5** *N*-benzyl-4-methyl-*N*-propylbenzenesulfonamide

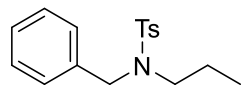

$C_{17}H_{21}NO_2S$   
MW: 303.42 g.mol<sup>-1</sup>  
Colorless oil  
42 % (31.8 mg)

The product was obtained by column chromatography on silica gel using petroleum ether/EtOAc (from 100:0 to 80:20) as eluent.

**<sup>1</sup>H NMR (500 MHz, CDCl<sub>3</sub>):**  $\delta$  7.73 (d, *J* = 8.3 Hz, 2H), 7.34 – 7.25 (m, 7H), 4.32 (s, 2H), 3.08 – 3.01 (m, 2H), 2.44 (s, 3H), 1.34 (dq, *J* = 14.9, 7.4 Hz, 2H), 0.70 (t, *J* = 7.4 Hz, 3H).

**<sup>13</sup>C NMR (126 MHz, CDCl<sub>3</sub>):**  $\delta$  143.3, 137.3, 136.8, 129.8 (x2), 128.6 (x2), 128.4 (x2), 127.8, 127.3 (x2), 52.0, 50.0, 21.7, 21.5, 11.3.

**HRMS (ESI-TOF) m/z:** [M+K]<sup>+</sup> calcd for C<sub>17</sub>H<sub>21</sub>KNO<sub>2</sub>S 342.0925; found 342.0921.

**IR (neat):**  $\nu$  = 3063, 3030, 2967, 2934, 2875, 1598, 1495, 1455, 1338, 1157, 1091, 1034, 940, 815, 736, 655, 549 cm<sup>-1</sup>.

**Compound 6** *N*-cyclopropyl-*N*-(2-hydroxyethyl)-4-methylbenzenesulfonamide

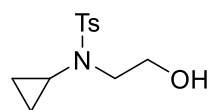

$C_{12}H_{17}NO_3S$   
MW: 255.33 g.mol<sup>-1</sup>  
White solid  
61 % (24.9 mg)

The product was obtained by column chromatography on silica gel using petroleum ether/EtOAc (from 88:12 to 0:100) as eluent.

**<sup>1</sup>H NMR (400 MHz, CDCl<sub>3</sub>):**  $\delta$  7.76 (d, *J* = 8.3 Hz, 2H), 7.34 (d, *J* = 8.0 Hz, 2H), 3.80 (q, *J* = 5.6 Hz, 2H), 3.31 (t, *J* = 5.5 Hz, 2H), 2.44 (s, 3H), 2.18 – 2.05 (m, 2H), 0.95 – 0.85 (m, 2H), 0.76 – 0.64 (m, 2H).

**<sup>13</sup>C NMR (126 MHz, CDCl<sub>3</sub>):**  $\delta$  143.9, 134.8, 129.8 (x2), 127.9 (x2), 61.3, 53.7, 32.0, 21.7, 7.7 (x2).

**HRMS (ESI-TOF) m/z:** [M+Na]<sup>+</sup> calcd for C<sub>12</sub>H<sub>17</sub>NNaO<sub>3</sub>S 278.0821; found 278.0814.

**IR (neat):**  $\nu$  = 3537, 3022, 2927, 1891, 1597, 1454, 1334, 1304, 1155, 1108, 1034, 866, 816, 691, 579, 548 cm<sup>-1</sup>.

**Compound 7** 1-tosyl-2,5-dihydro-1H-pyrrole<sup>10</sup>

---

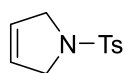

C<sub>11</sub>H<sub>13</sub>NO<sub>2</sub>S  
MW: 223.29 g.mol<sup>-1</sup>  
White solid  
95 % (55 mg)

The product was obtained by column chromatography on silica gel using petroleum ether/EtOAc (from 95:05 to 60:40) as eluent.

**<sup>1</sup>H NMR (400 MHz, CDCl<sub>3</sub>):**  $\delta$  7.72 (d, *J* = 8.2 Hz, 2H), 7.32 (d, *J* = 8.0 Hz, 2H), 5.65 (s, 2H), 4.12 (s, 4H), 2.42 (s, 3H).

*This analytical data match with those described in the literature.*

## NMR Spectra

---

<sup>10</sup> C. A. Urbina-Blanco, X. Bantreil, J. Wappel, T. E. Schmid, A. M. Z. Slawin, C. Slugovc and C. S. J. Cazin, *Organometallics*, 2013, **32**, 6240–6247.

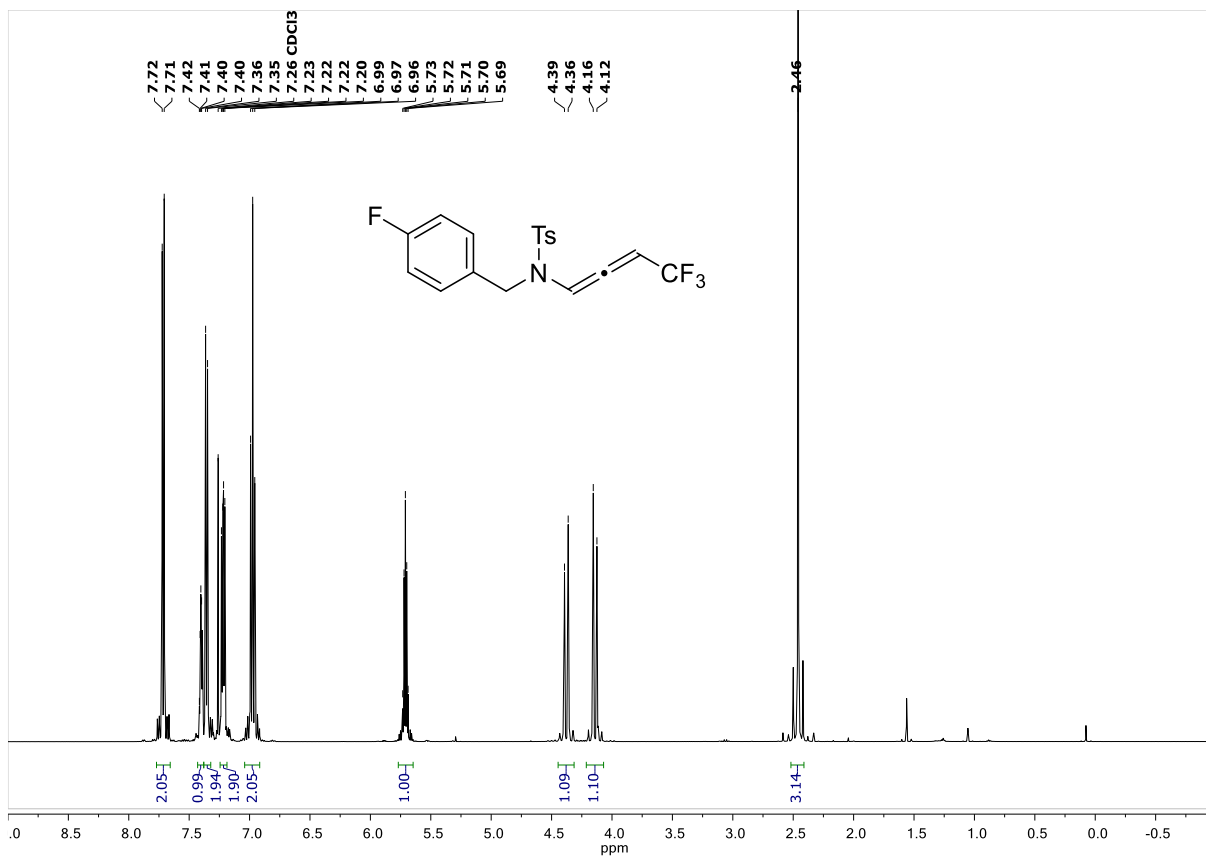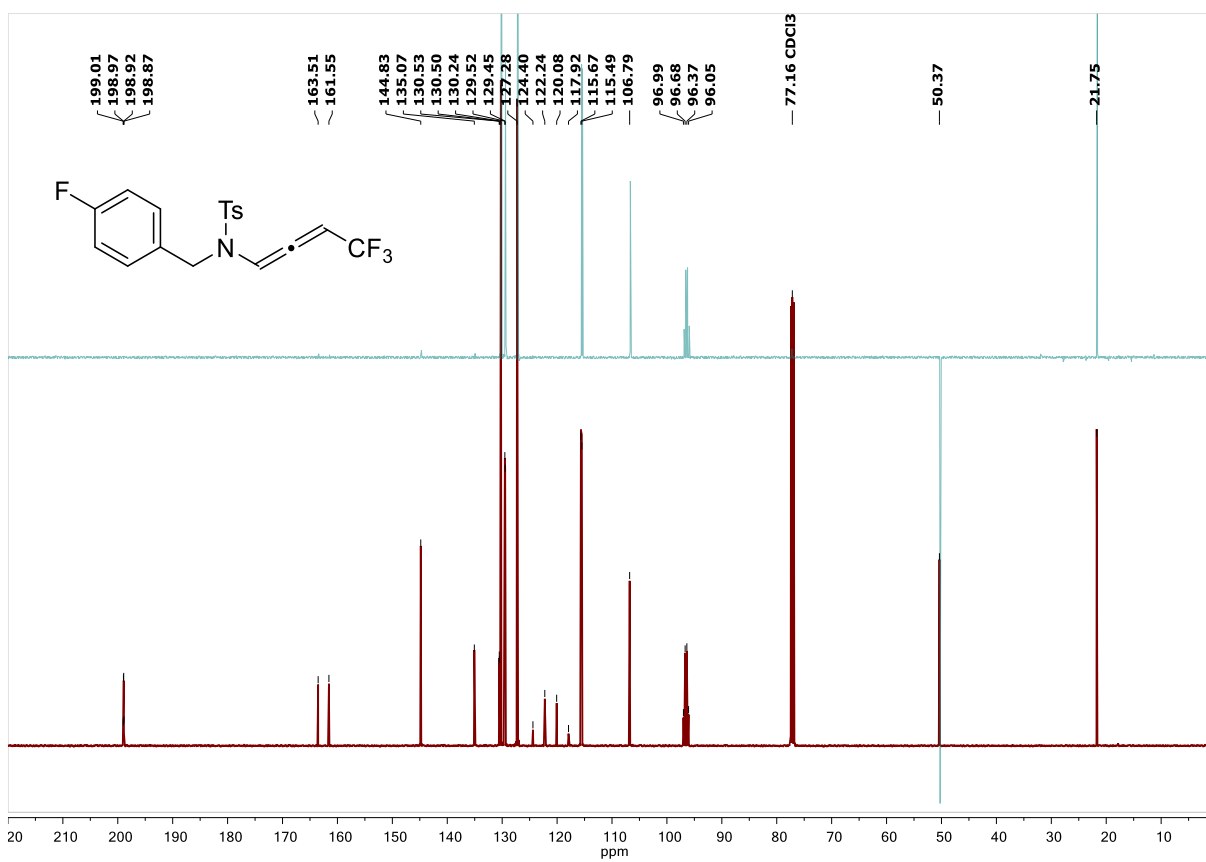

**<sup>13</sup>C{<sup>1</sup>H} NMR (CDCl<sub>3</sub>, 126 MHz) of **1c****  
S36

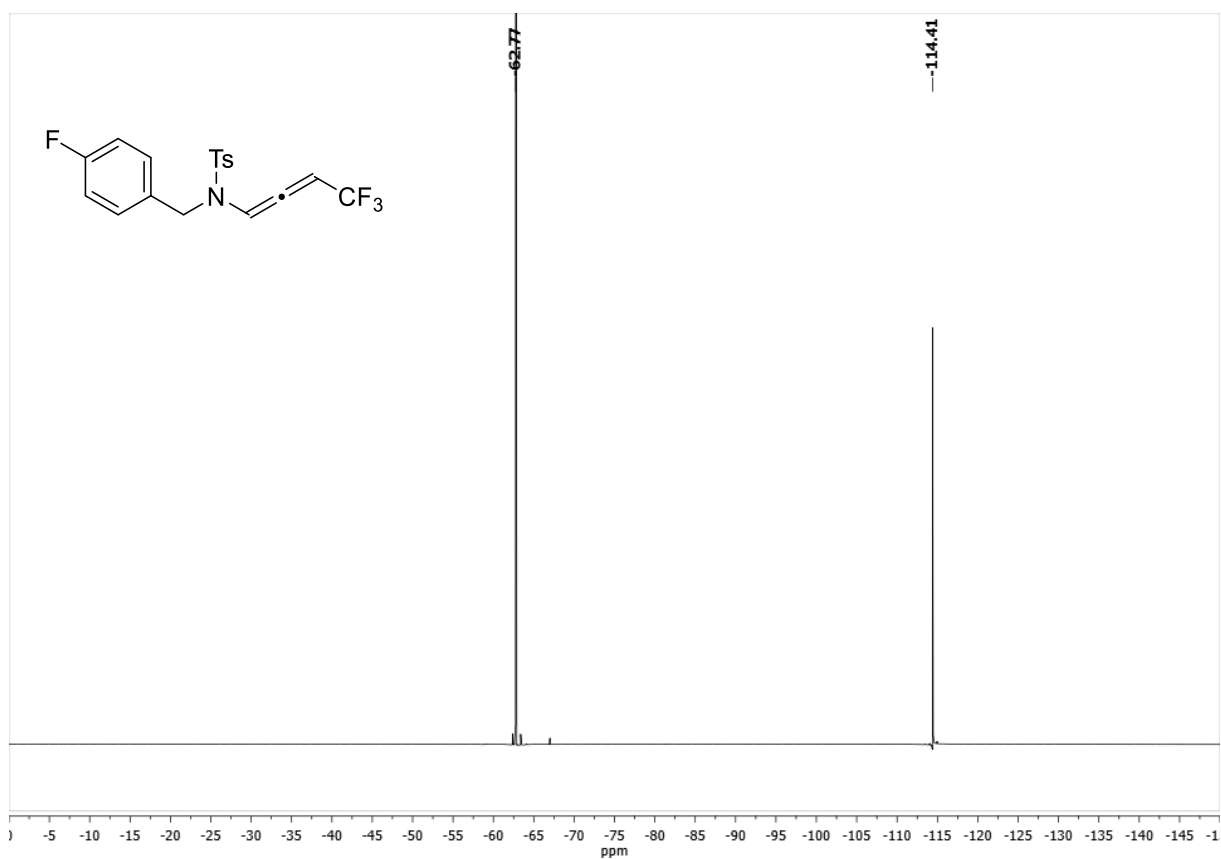

$^{19}\text{F}\{^1\text{H}\}$  NMR ( $\text{CDCl}_3$ , 282 MHz) of **1c**

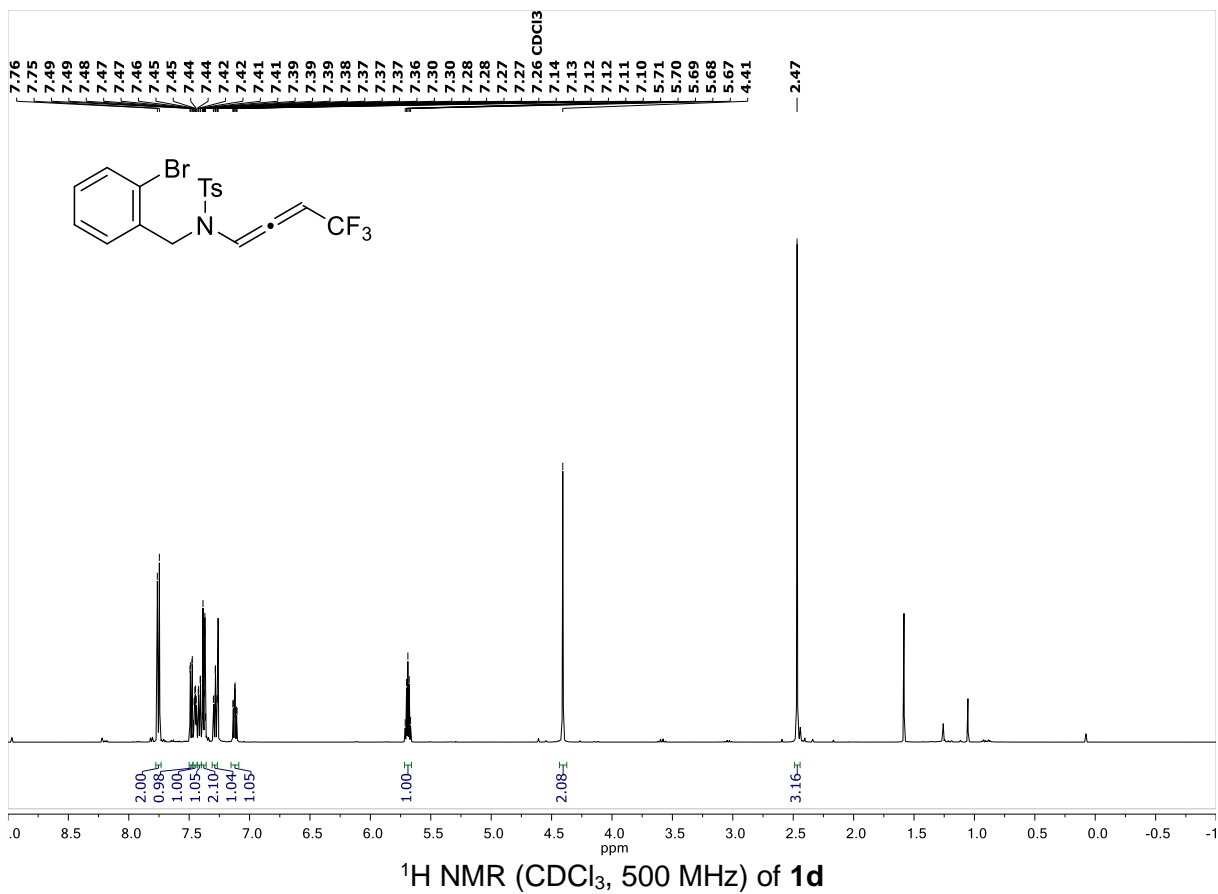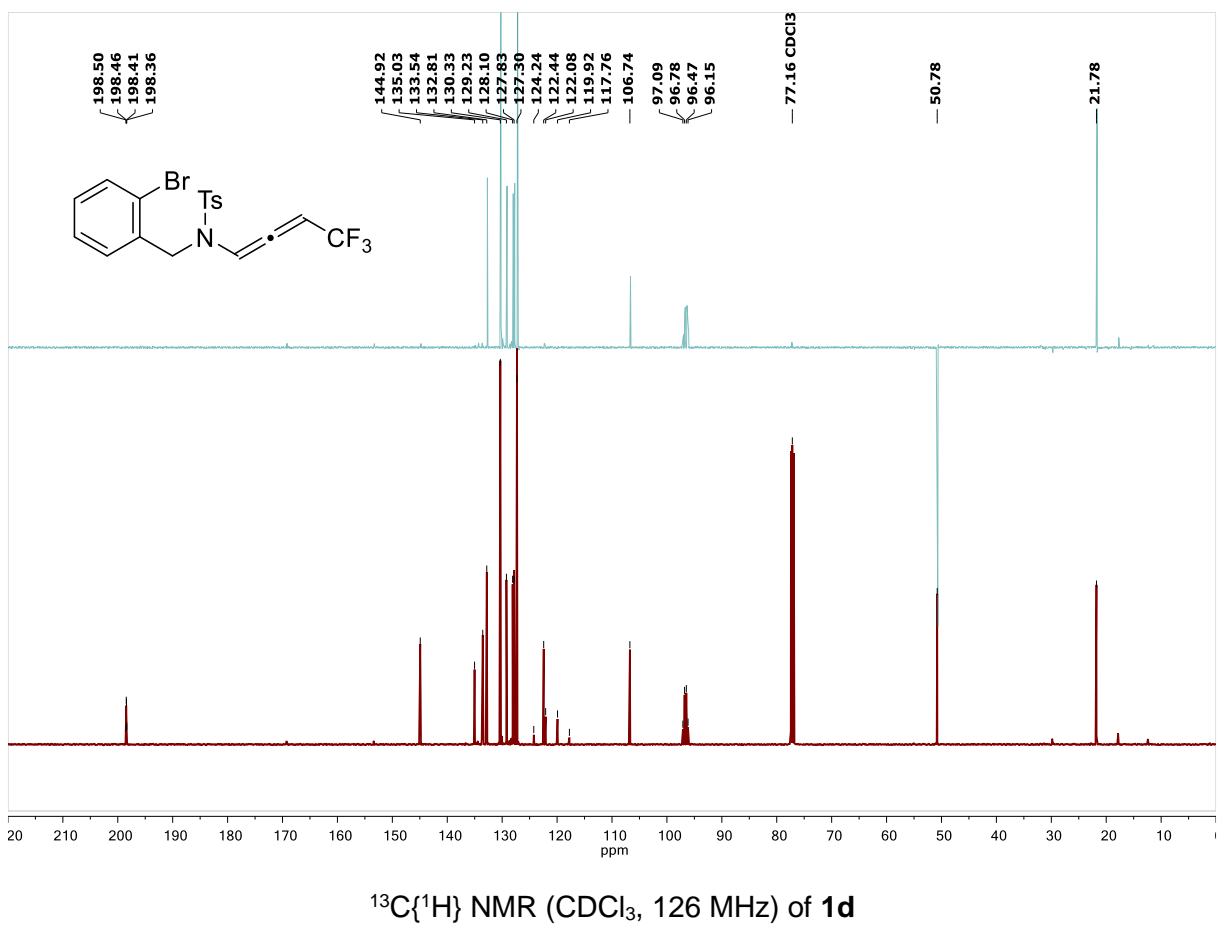

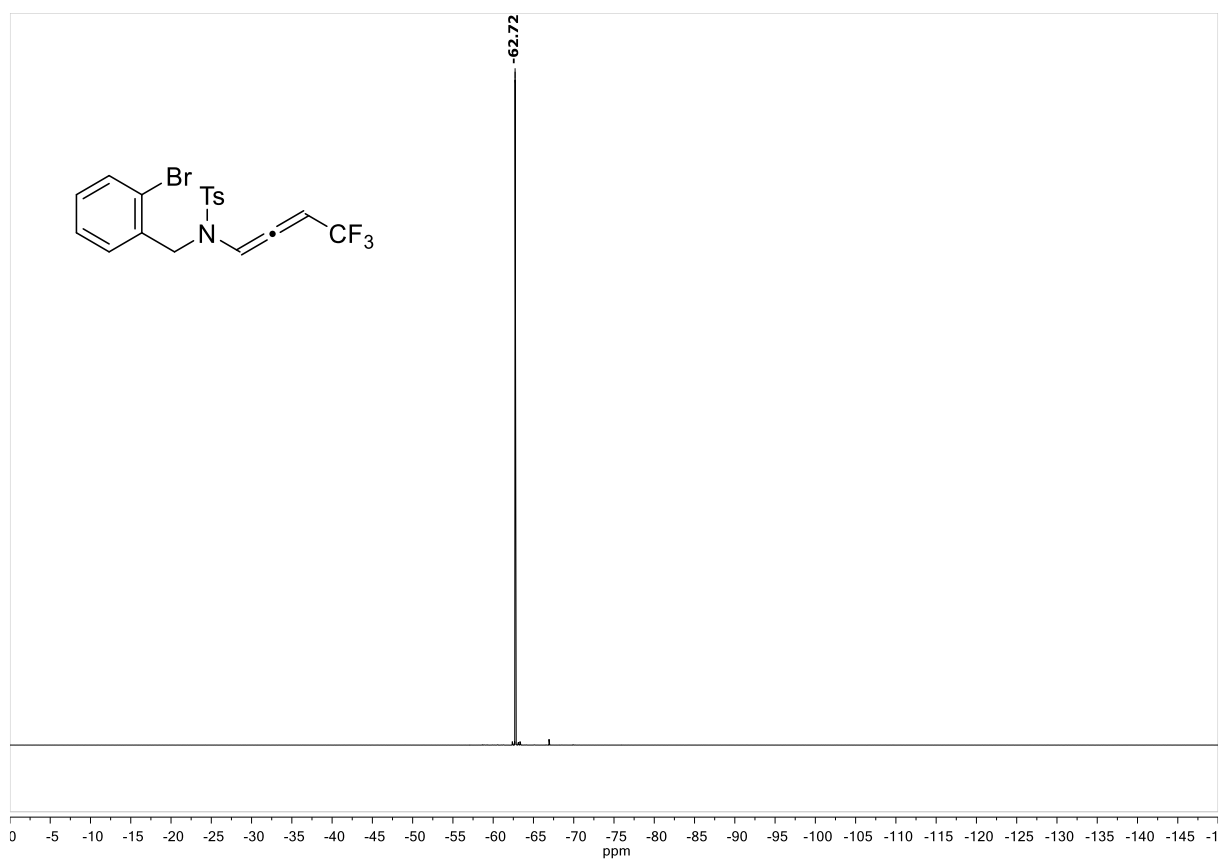

$^{19}\text{F}\{^1\text{H}\}$  NMR ( $\text{CDCl}_3$ , 282 MHz) of **1d**

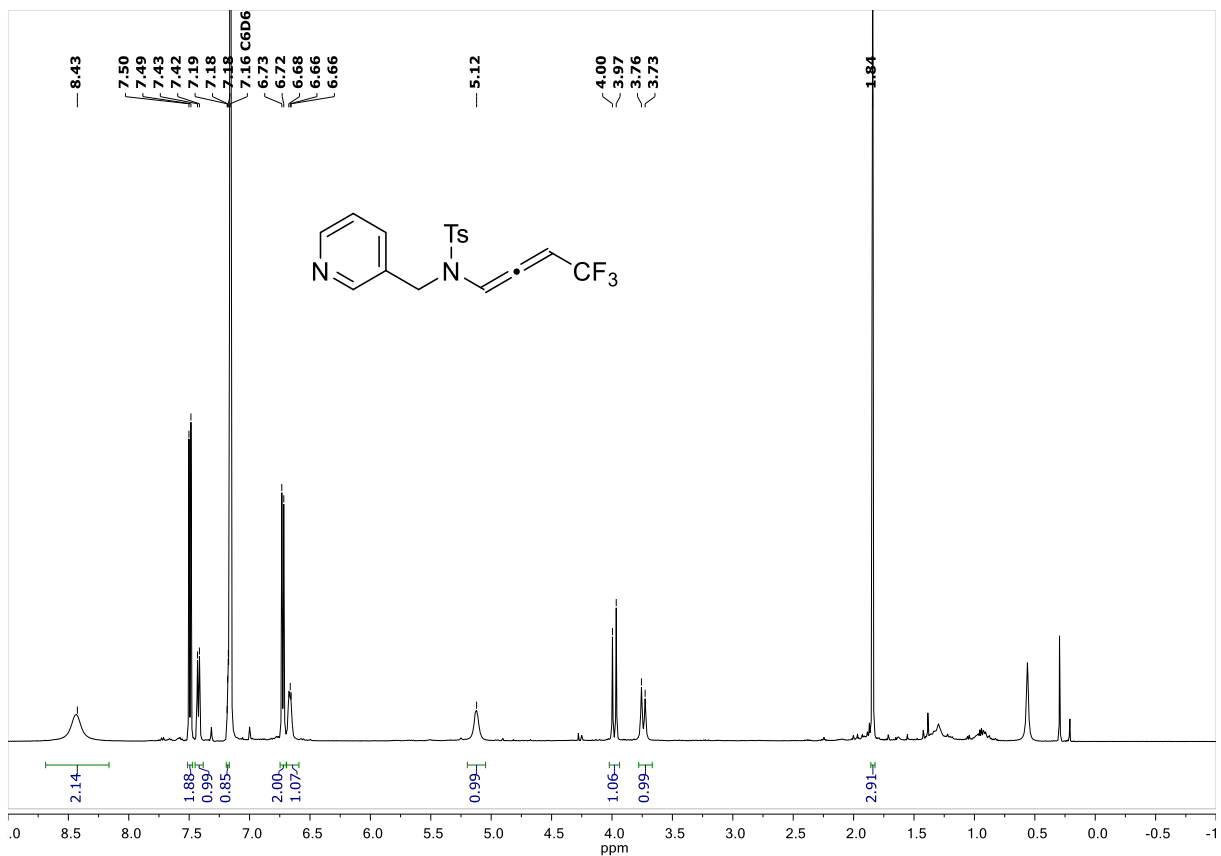

**<sup>1</sup>H NMR (C<sub>6</sub>D<sub>6</sub>, 500 MHz) of 1m**

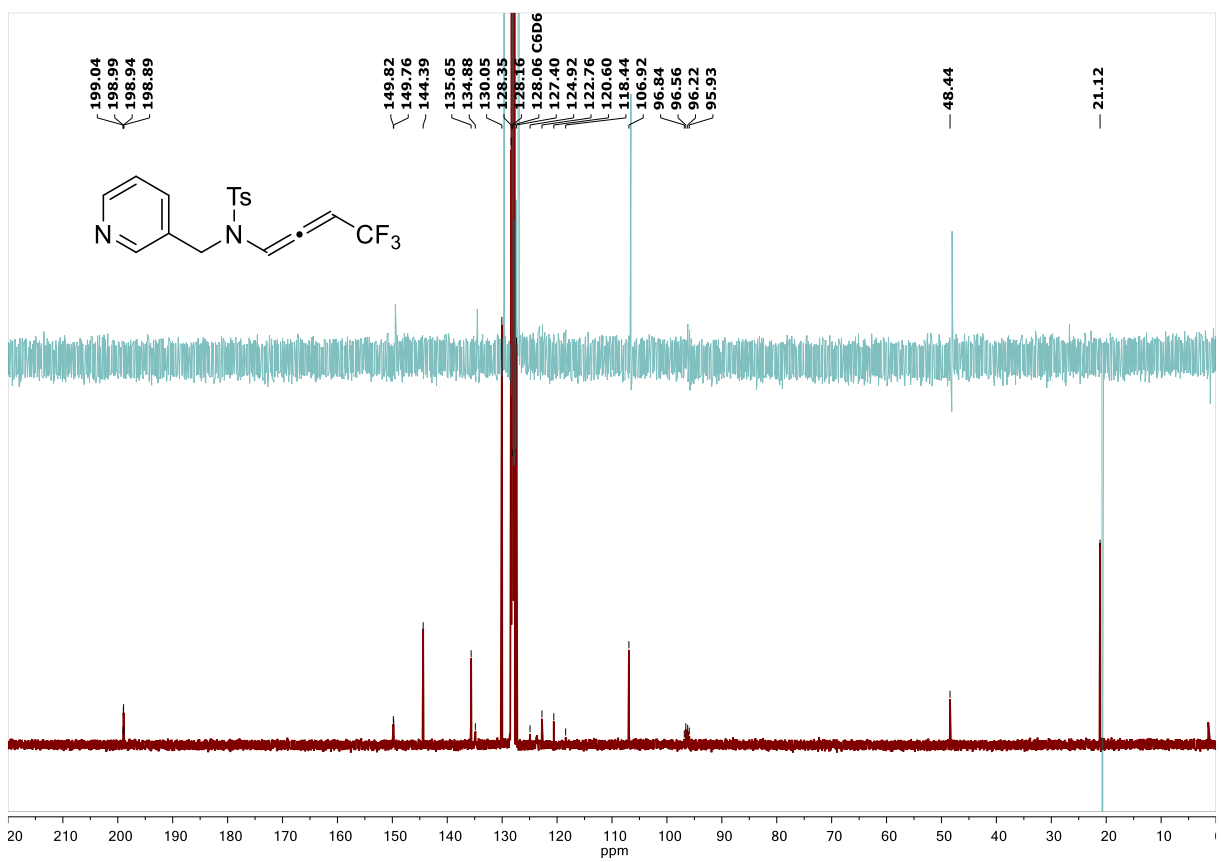

**<sup>13</sup>C{<sup>1</sup>H} NMR (C<sub>6</sub>D<sub>6</sub>, 126 MHz) of 1m**  
S40



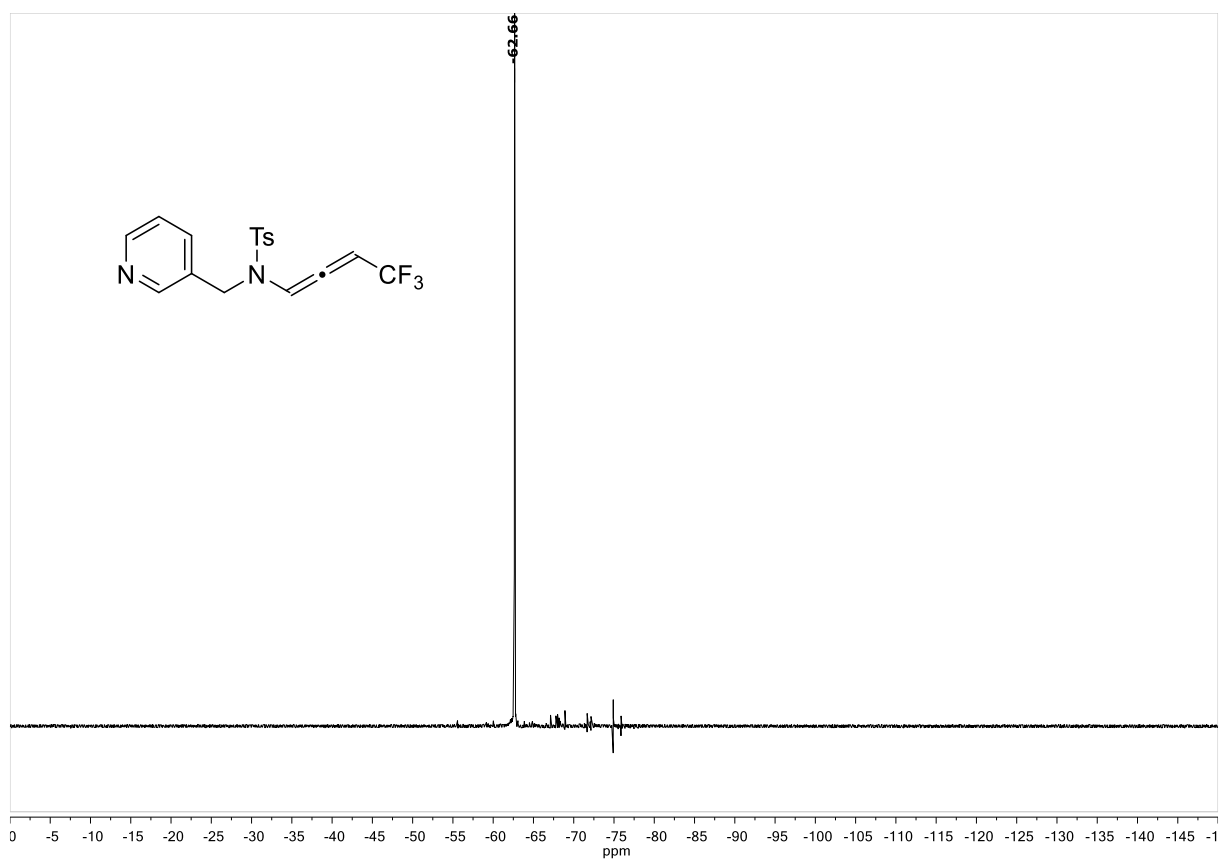

$^{19}\text{F}\{^1\text{H}\}$  NMR ( $\text{C}_6\text{D}_6$ , 282 MHz) of **1m**

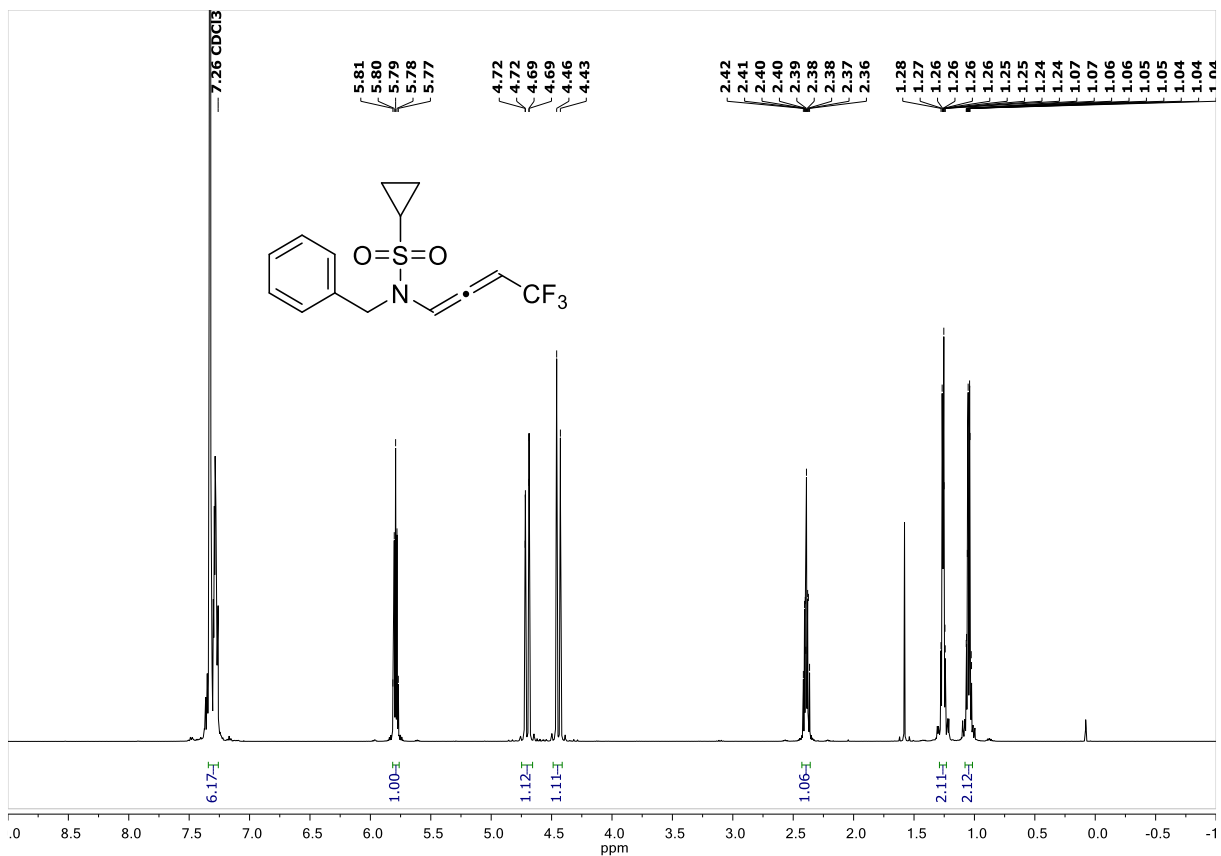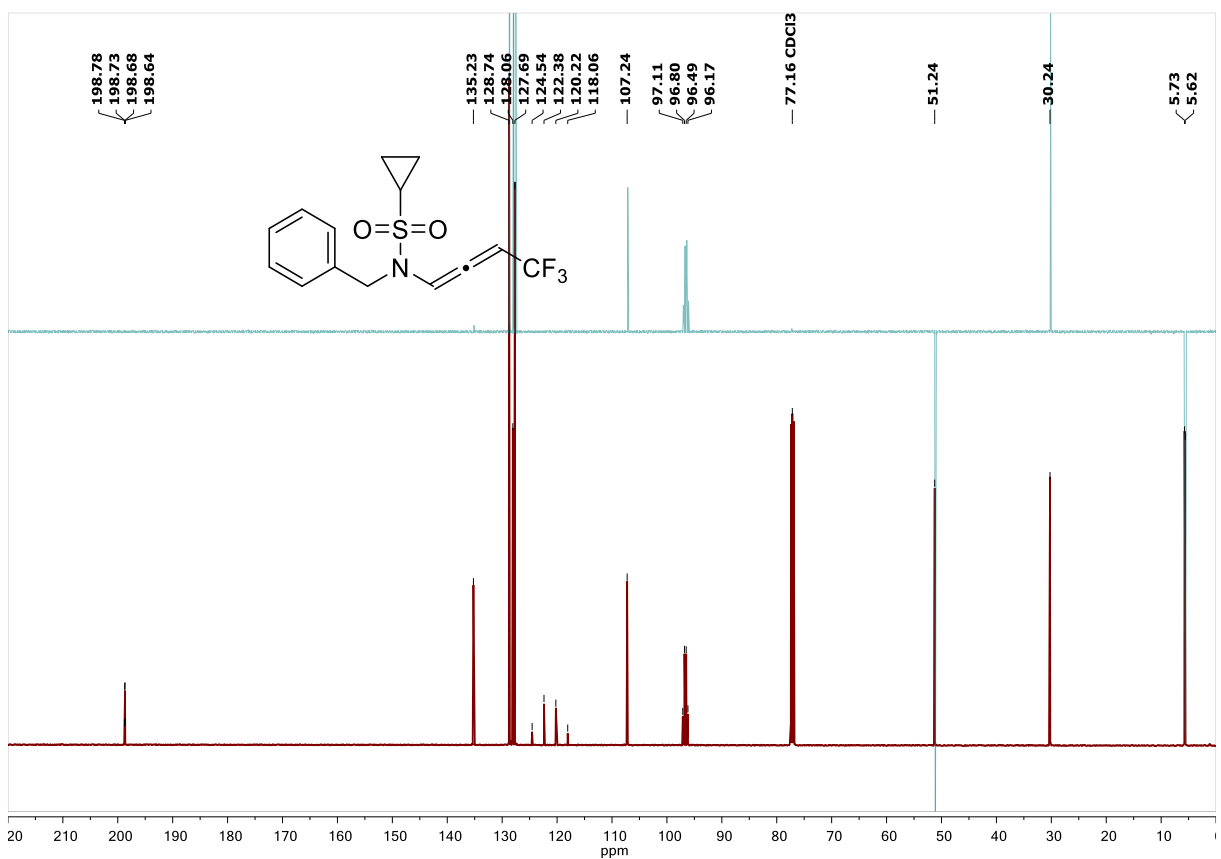

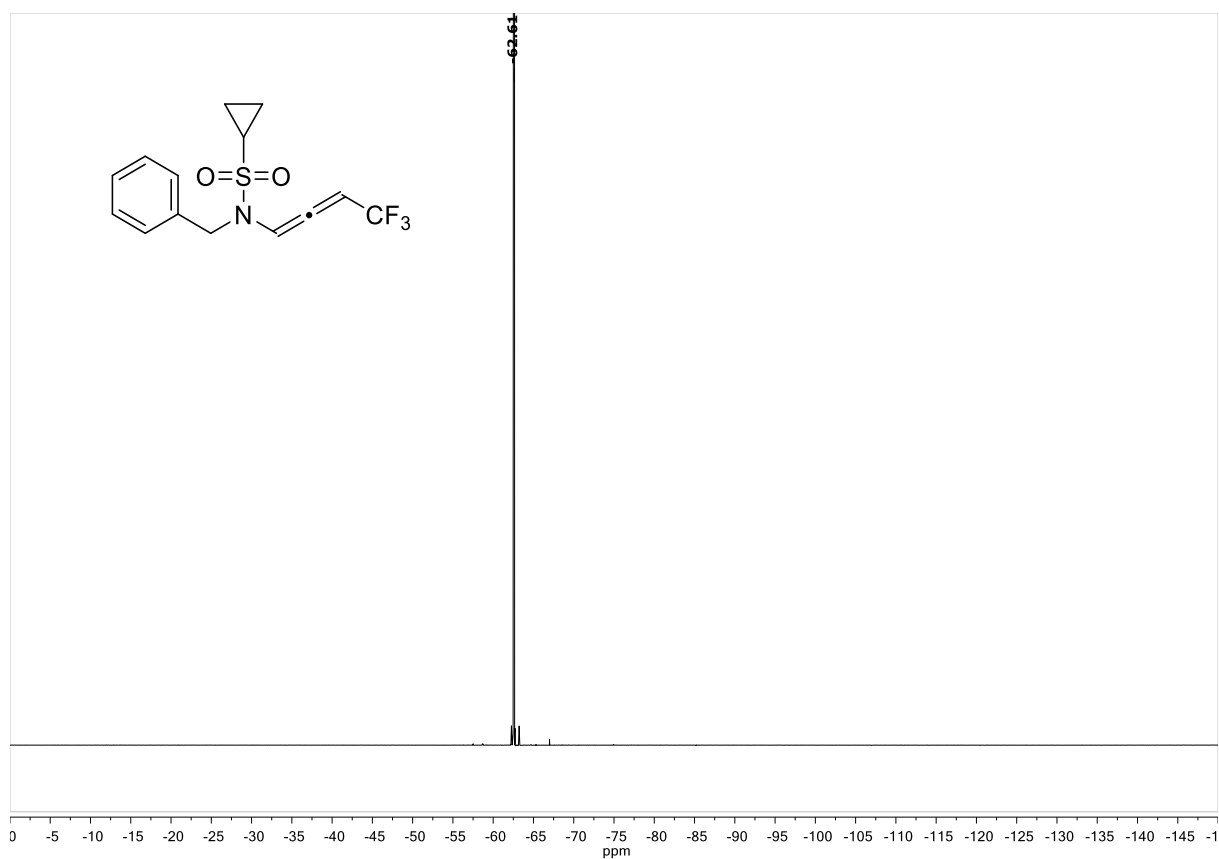

$^{19}\text{F}\{^1\text{H}\}$  NMR ( $\text{CDCl}_3$ , 282 MHz) of **1p**

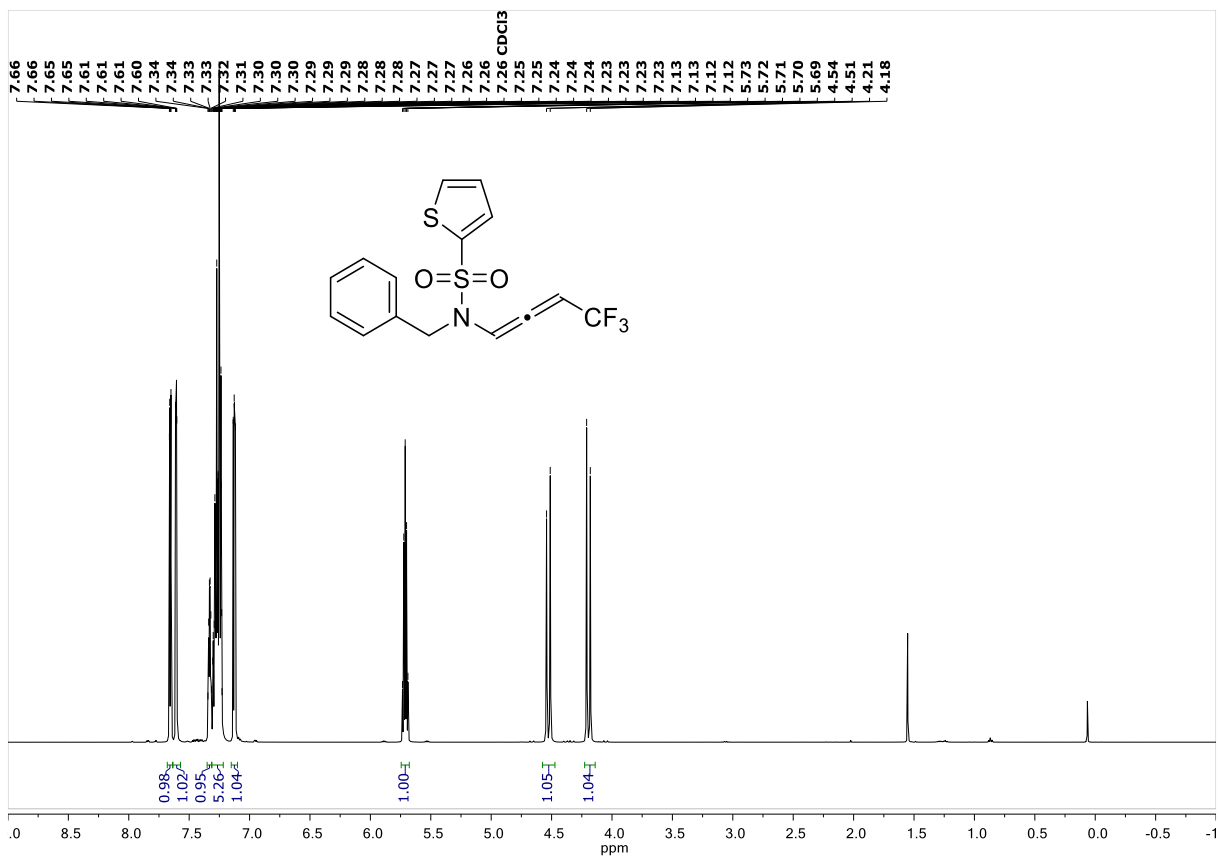

<sup>1</sup>H NMR (CDCl<sub>3</sub>, 500 MHz) of 1r

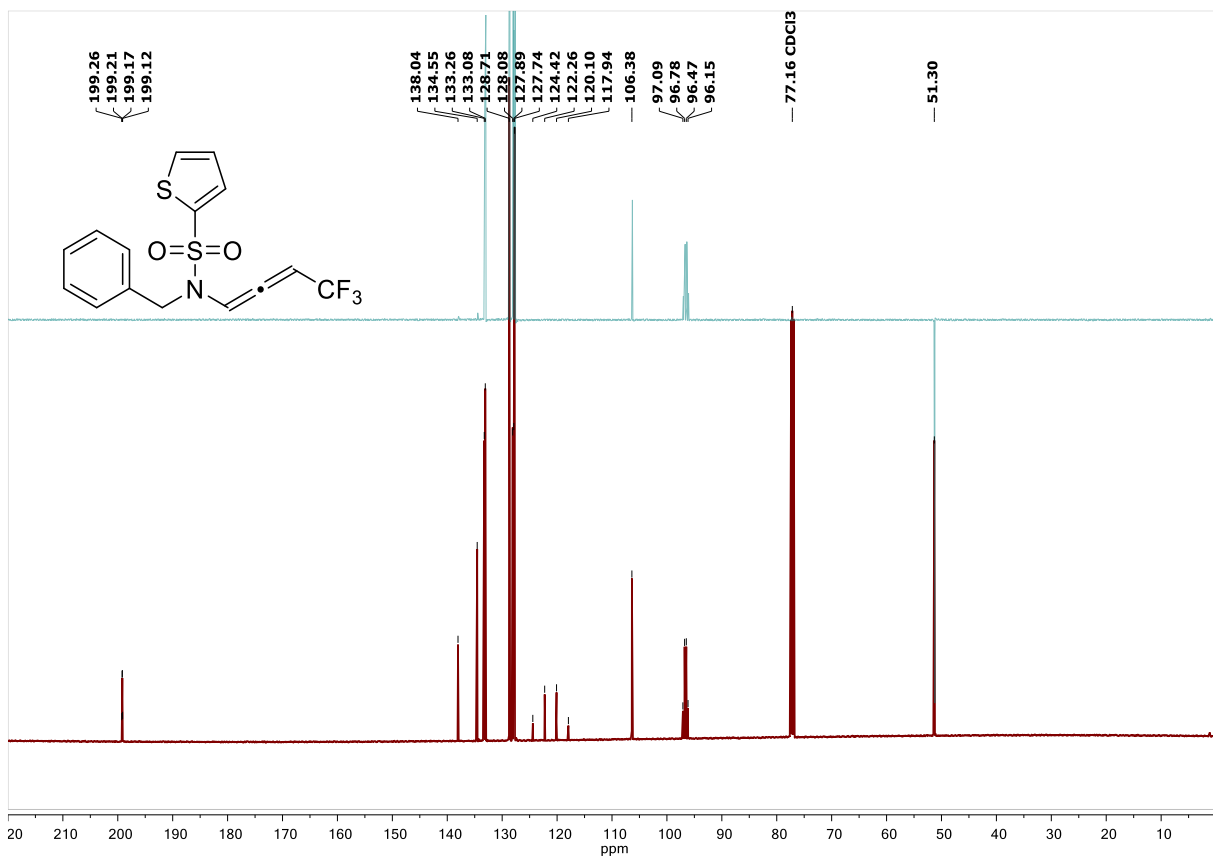

<sup>13</sup>C{<sup>1</sup>H} NMR (CDCl<sub>3</sub>, 126 MHz) of 1r

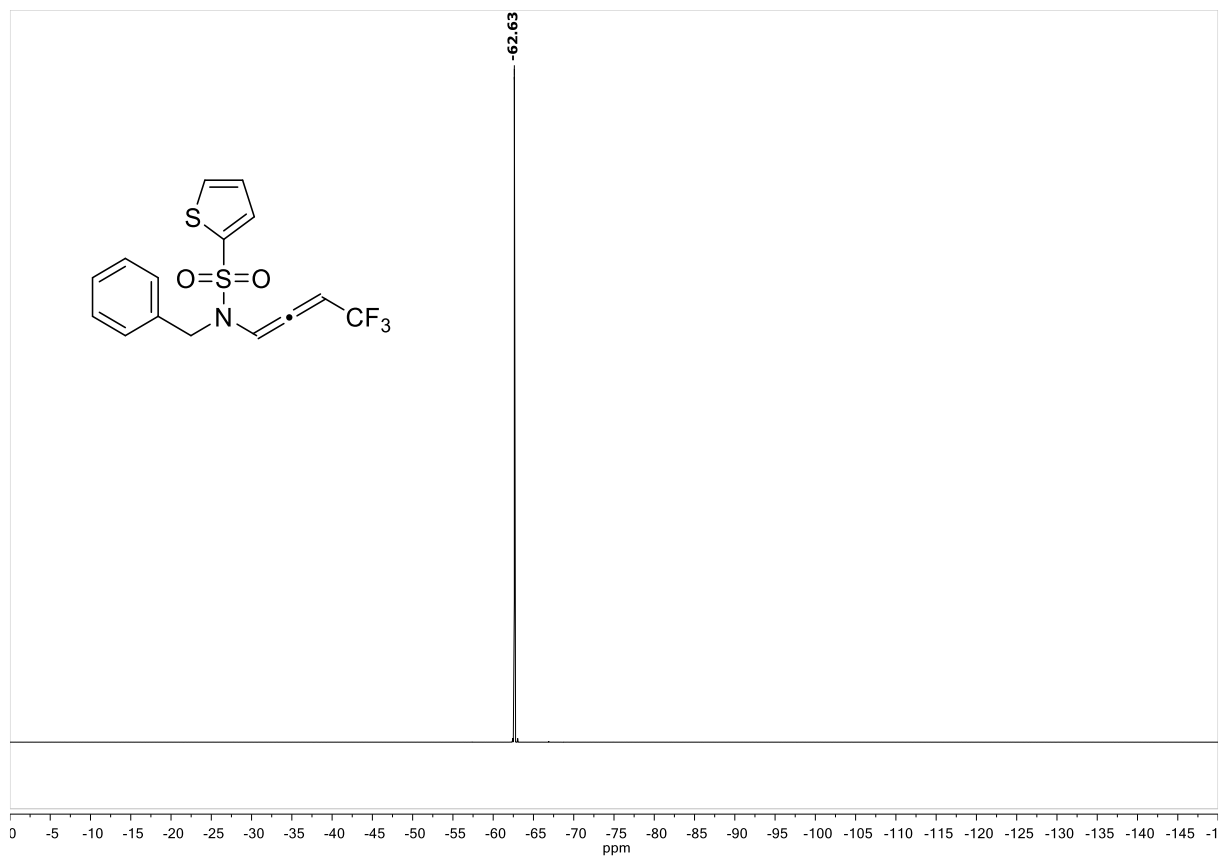

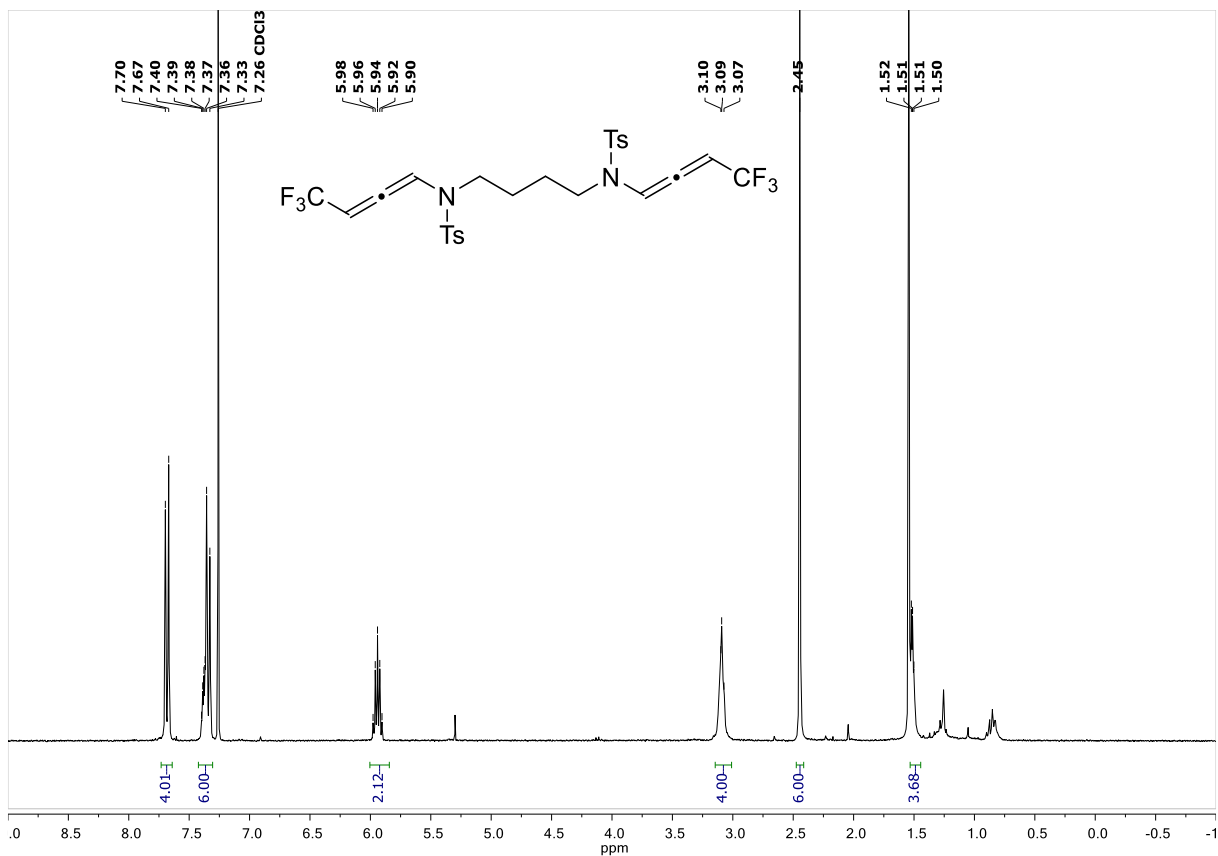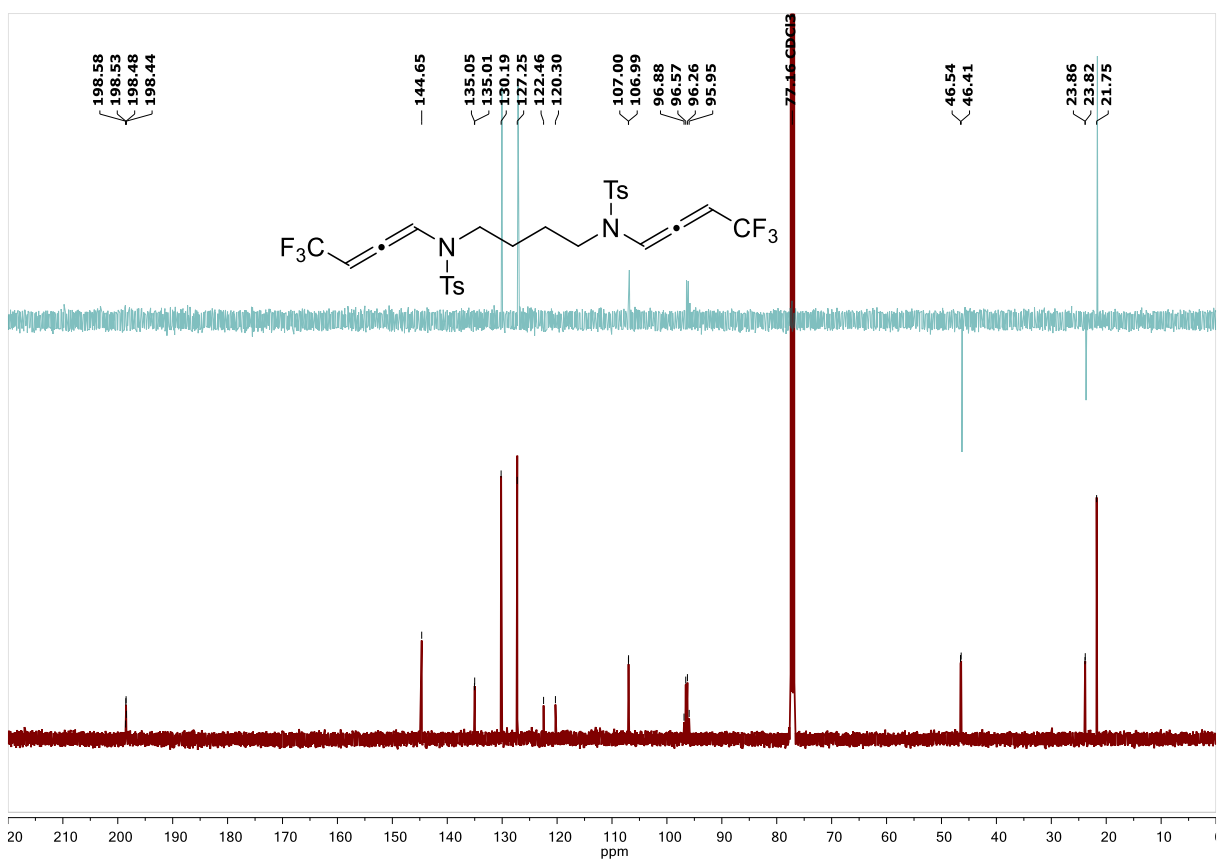

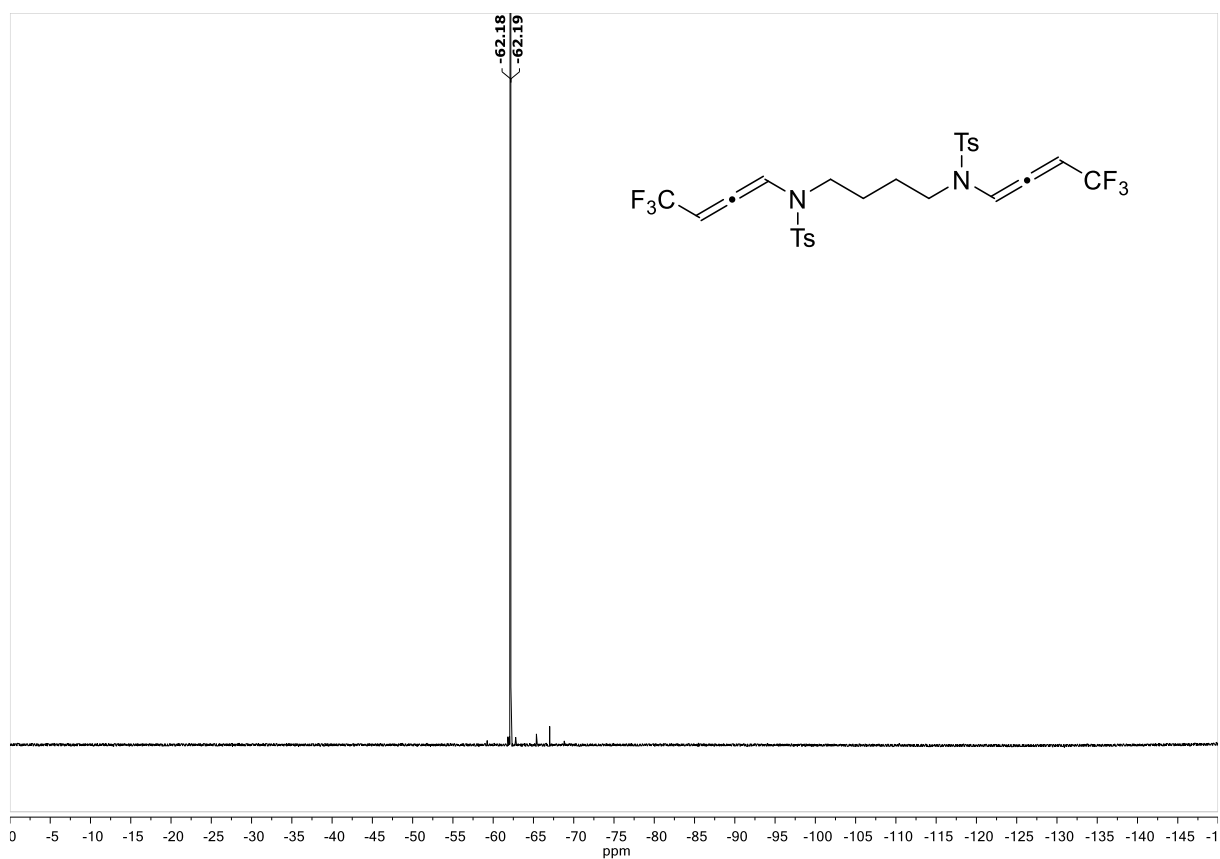

$^{19}\text{F}\{^1\text{H}\}$  NMR ( $\text{CDCl}_3$ , 282 MHz) of **1u**





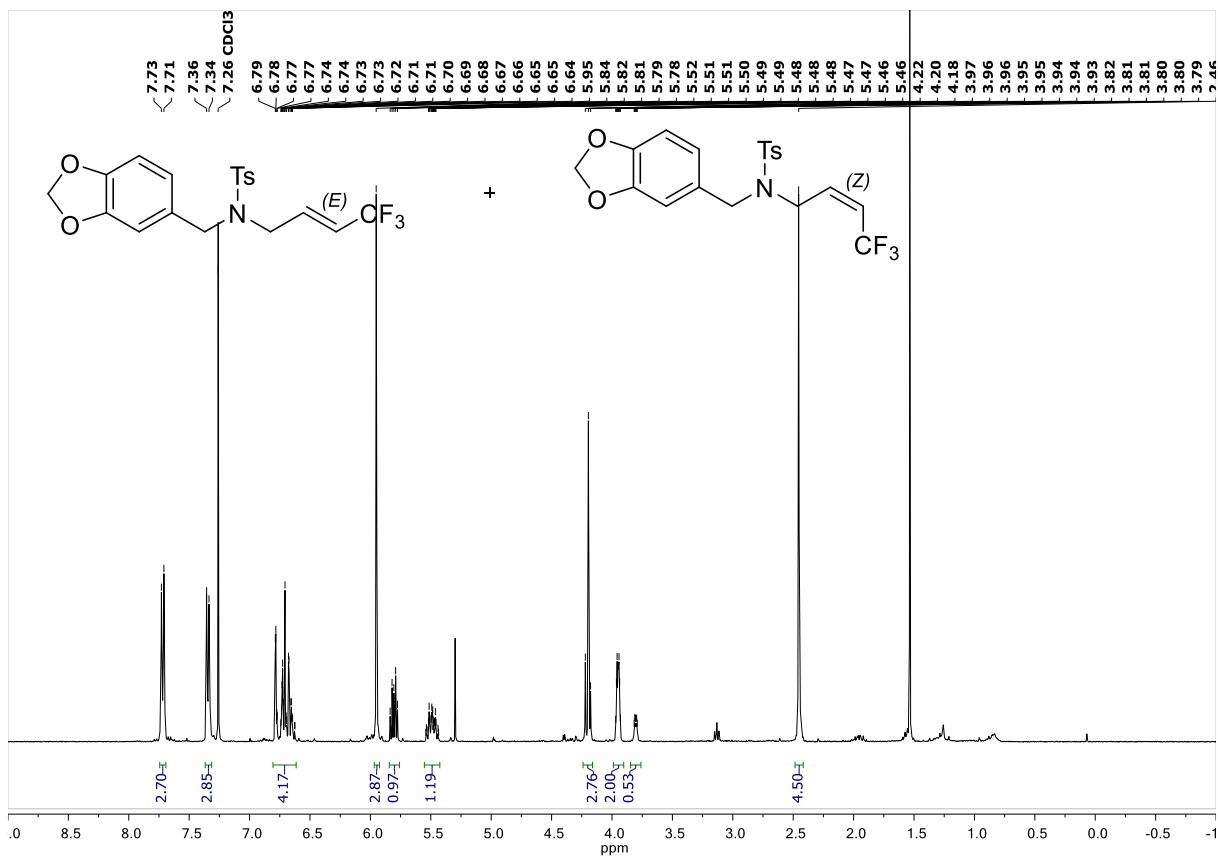

**<sup>1</sup>H NMR (CDCl<sub>3</sub>, 300 MHz) of 2b**

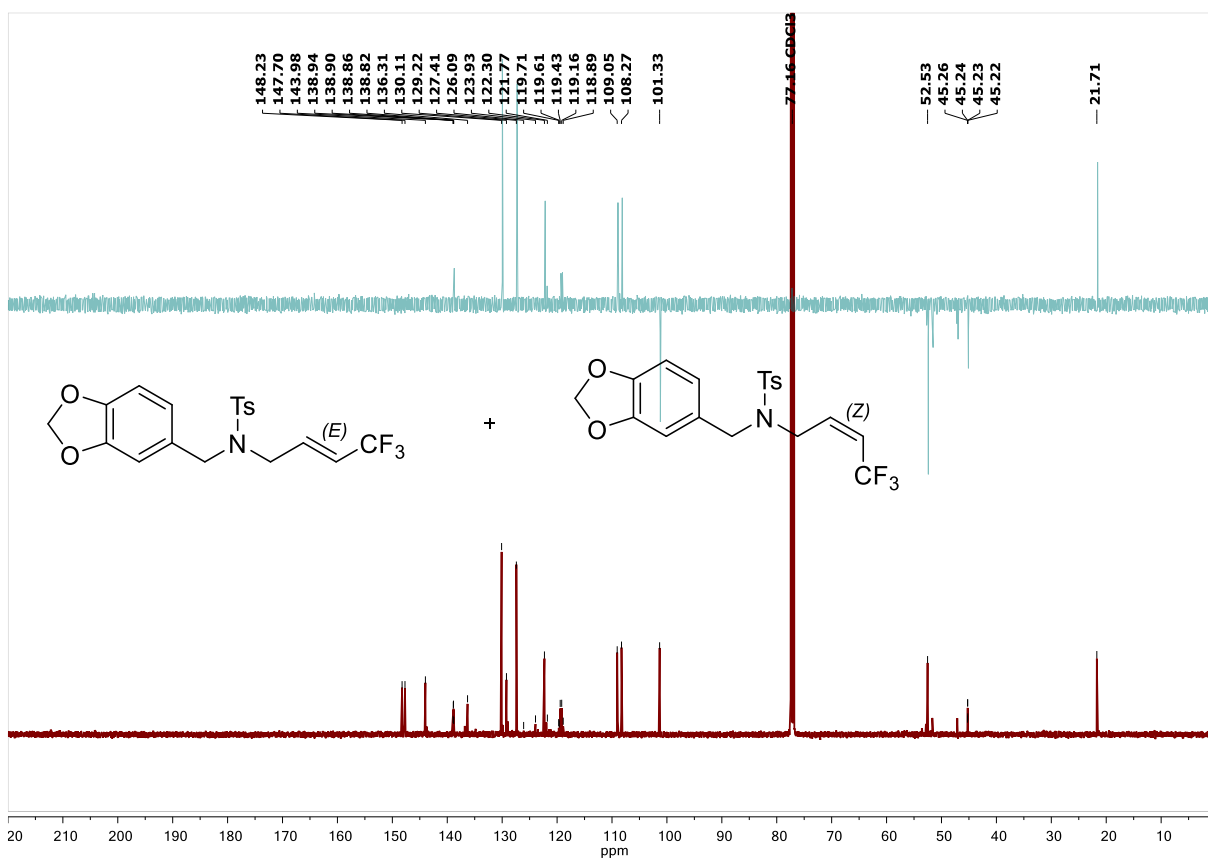

**<sup>13</sup>C{<sup>1</sup>H} NMR (CDCl<sub>3</sub>, 126 MHz) of 2b**



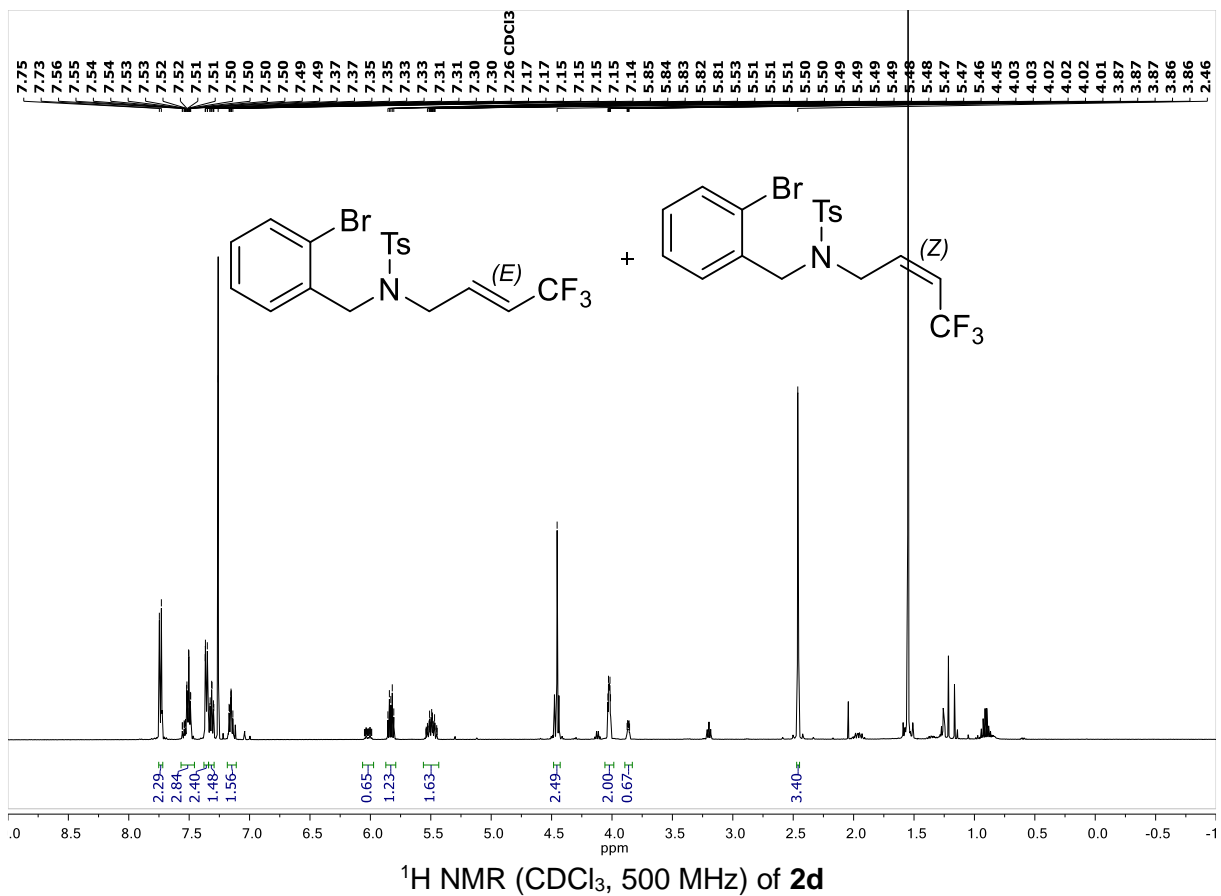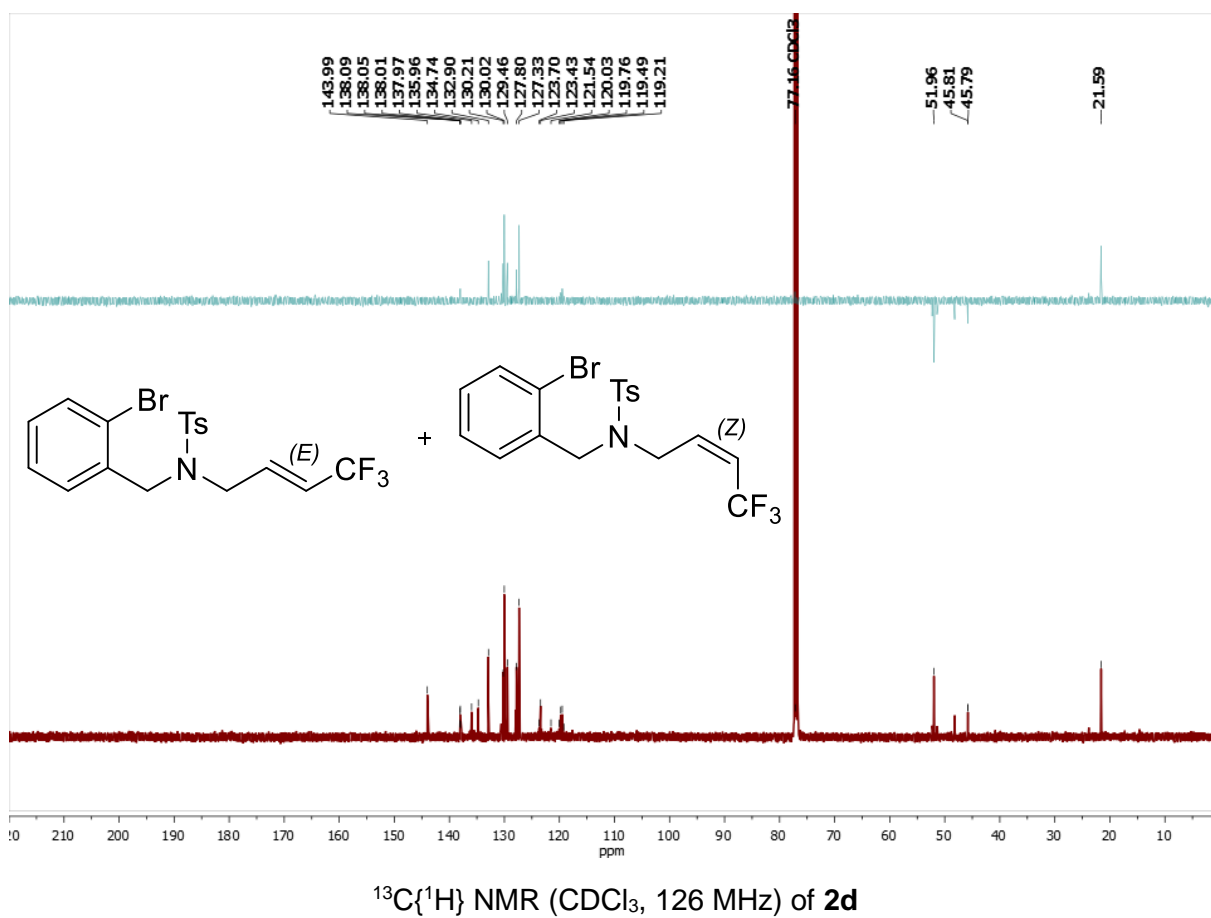

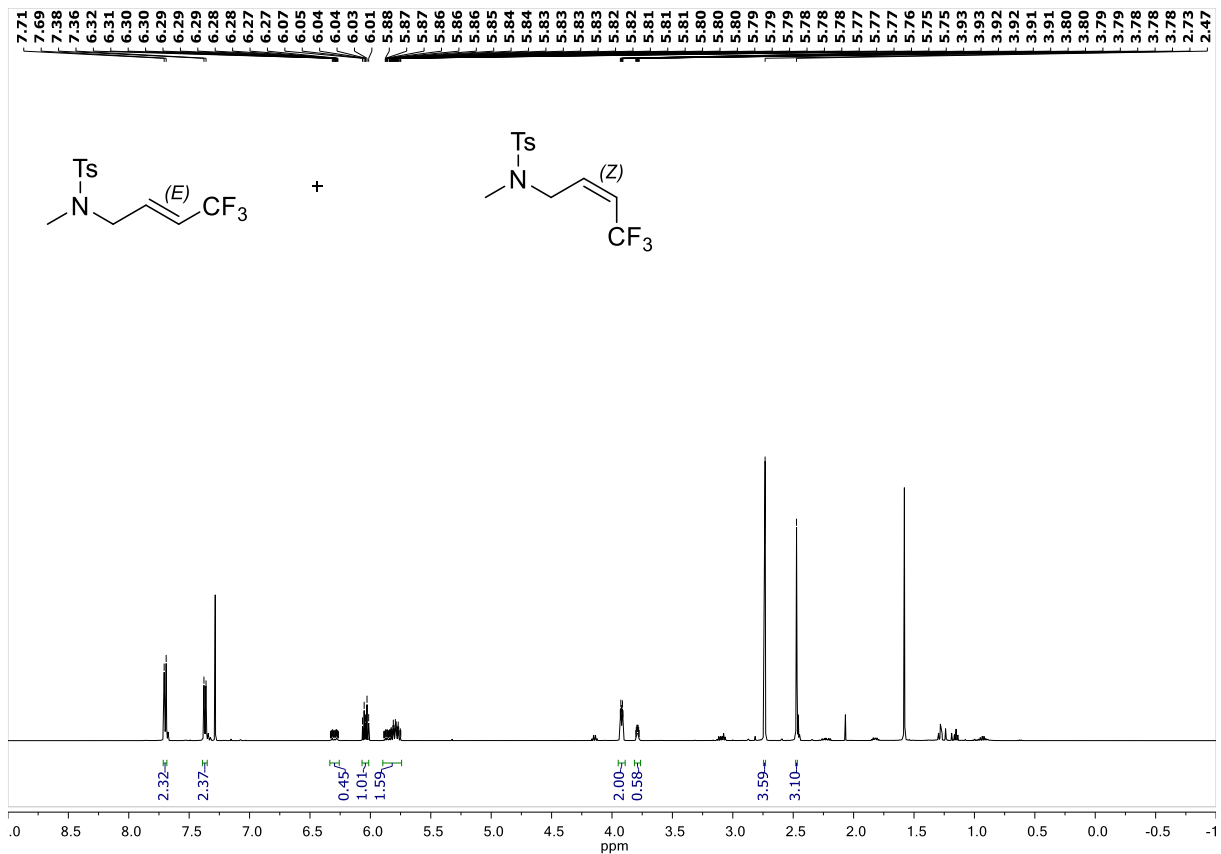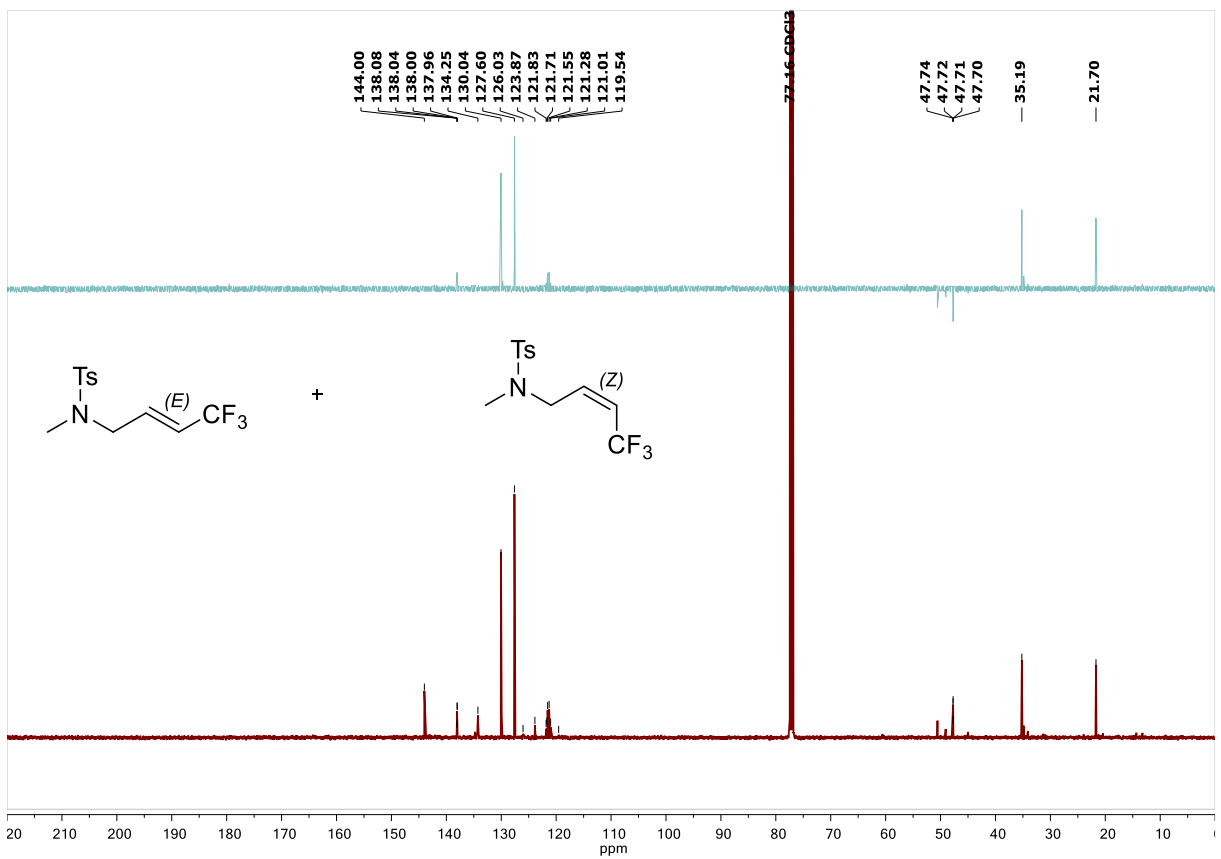

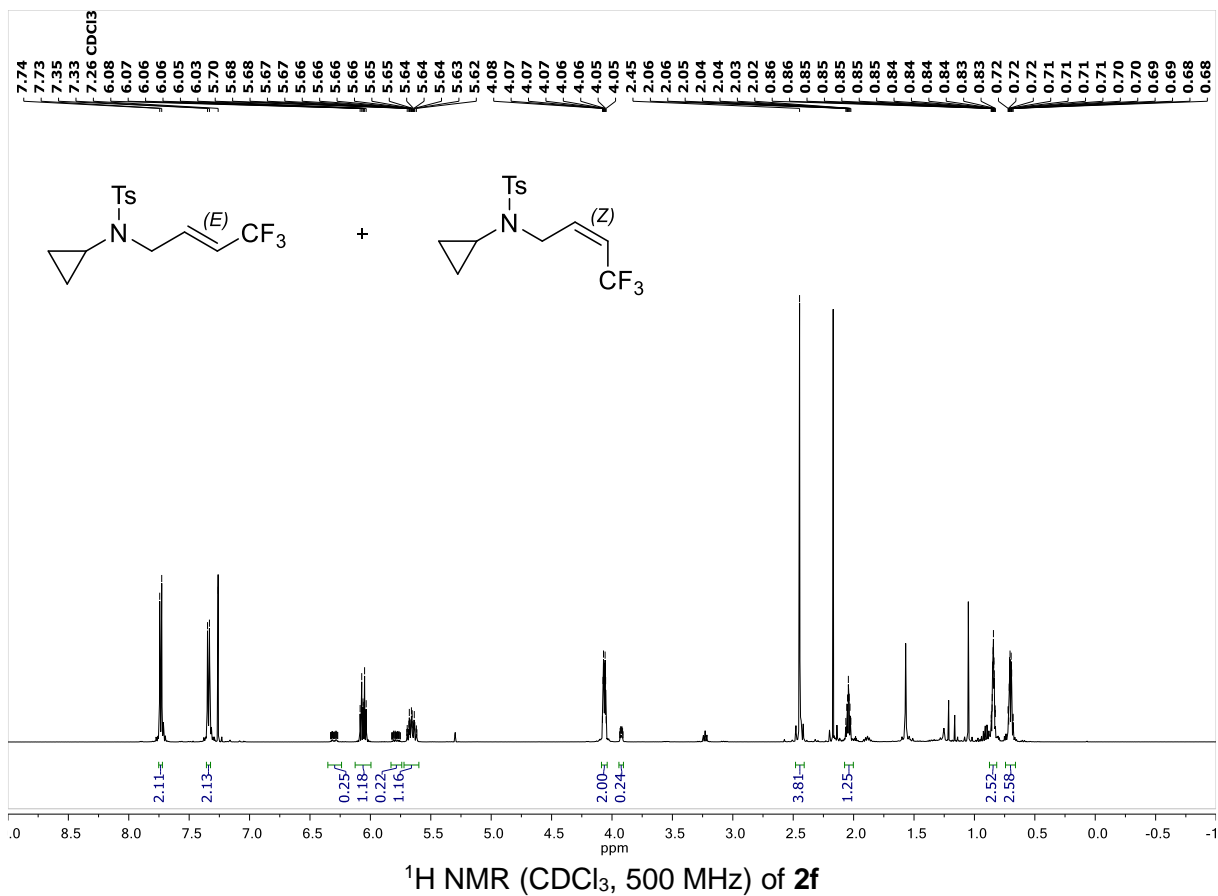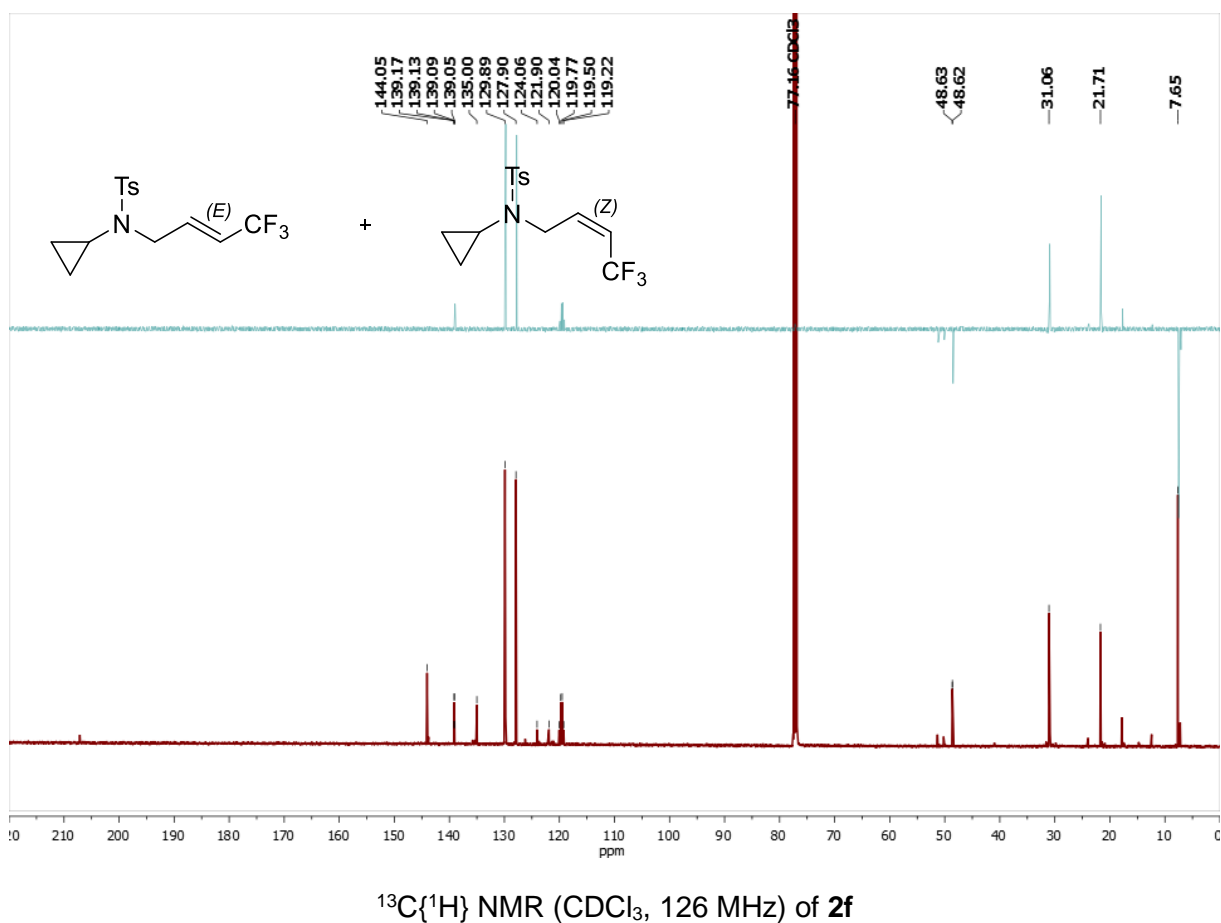

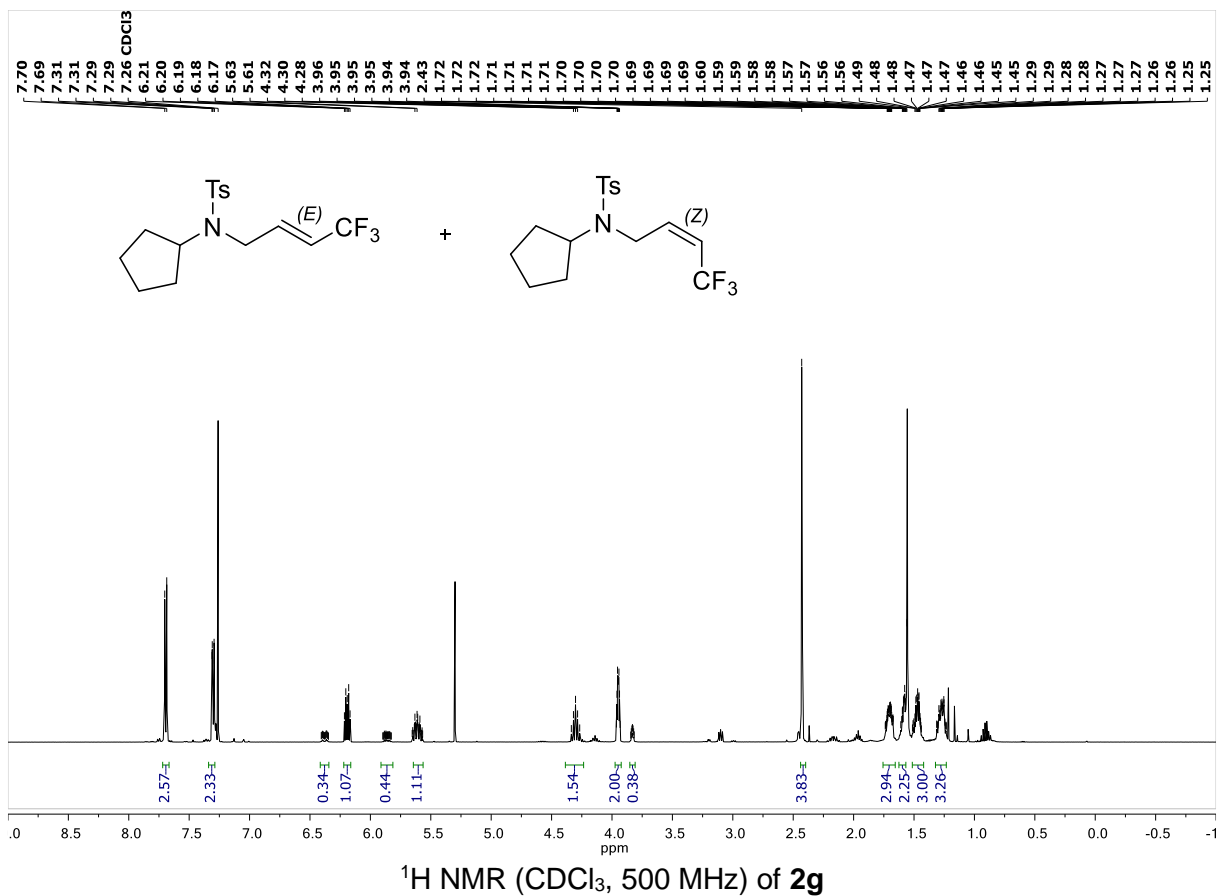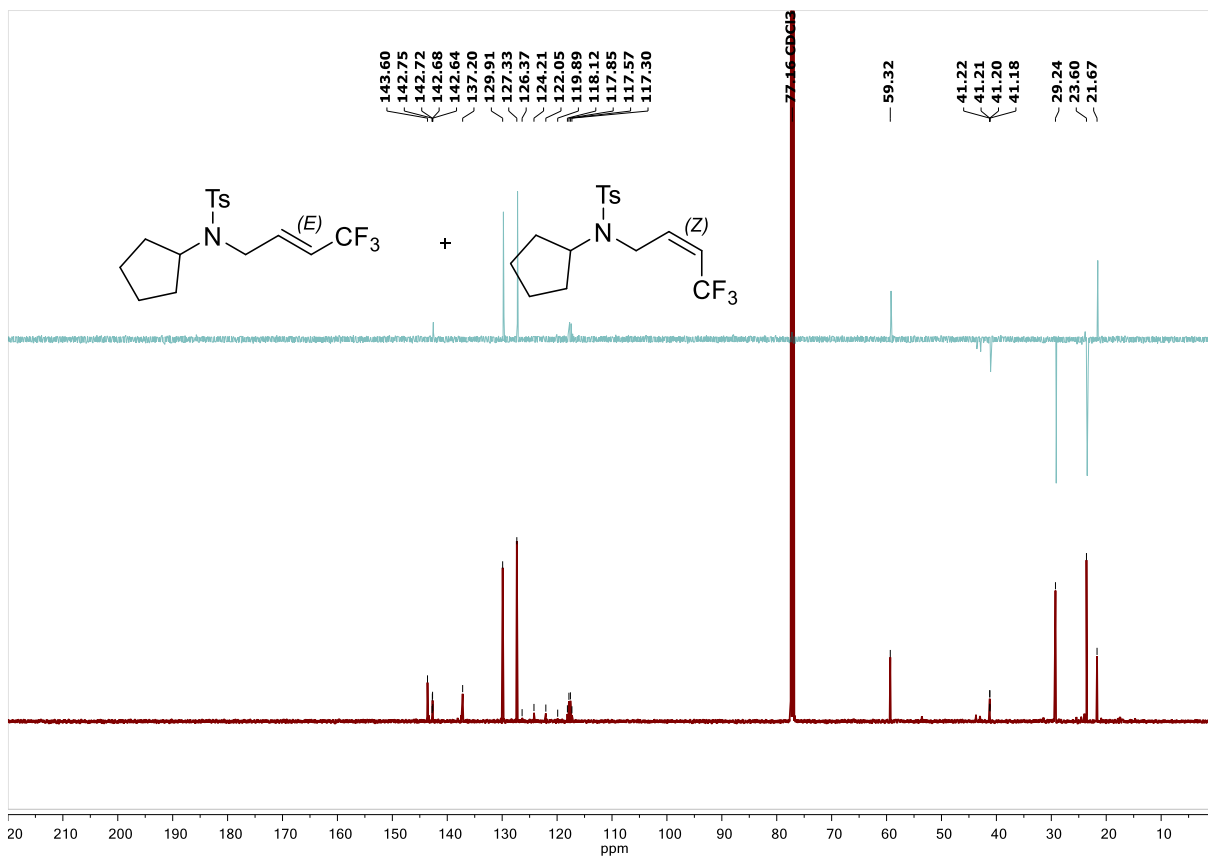

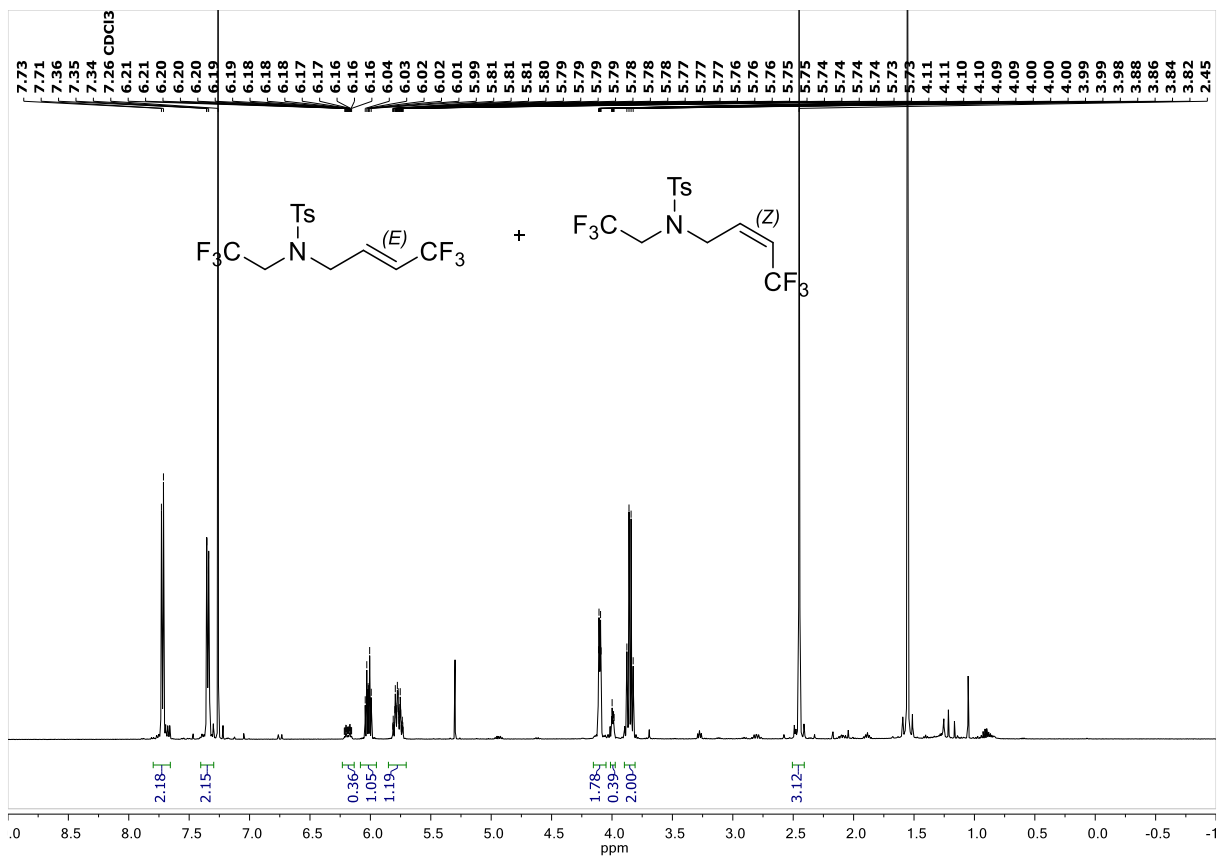

$^1\text{H NMR}$  ( $\text{CDCl}_3$ , 500 MHz) of **2h**

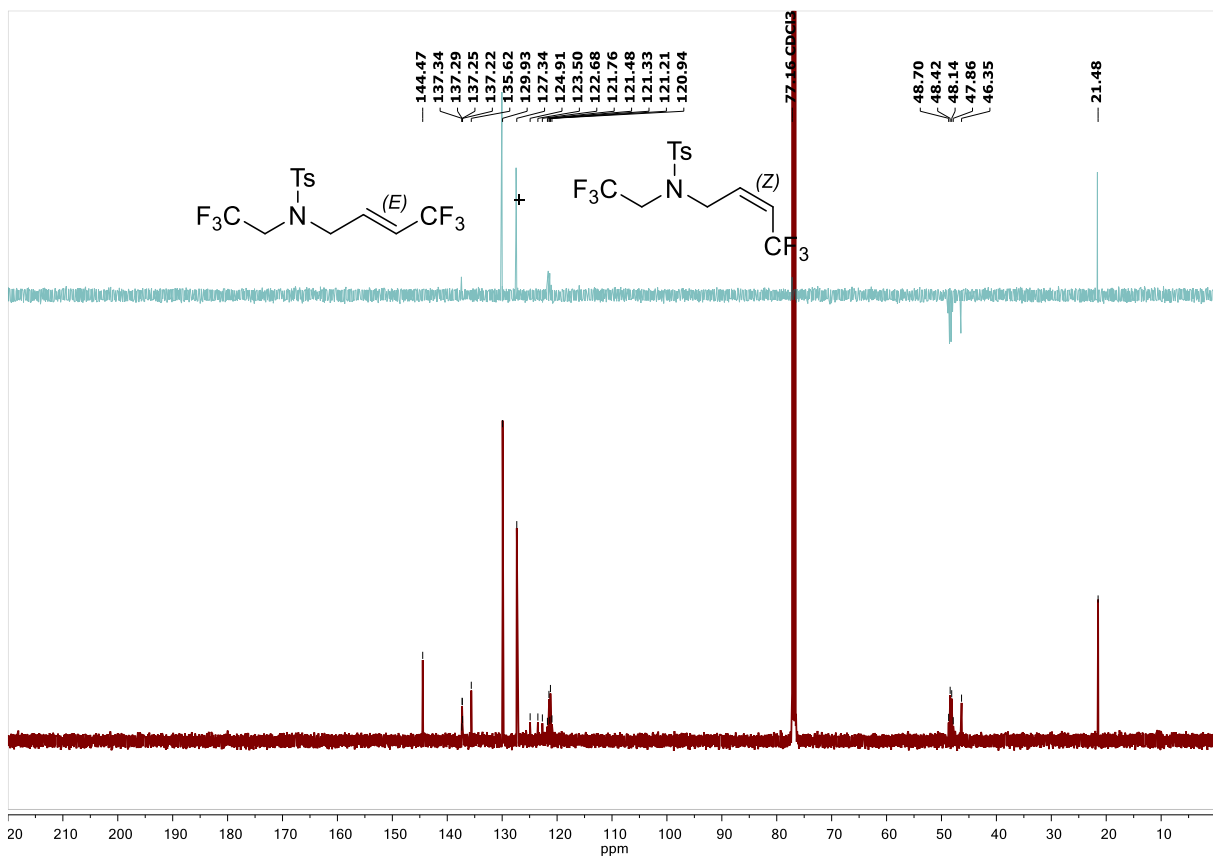

$^{13}\text{C}\{^1\text{H}\}$  NMR ( $\text{CDCl}_3$ , 126 MHz) of **2h**

S55

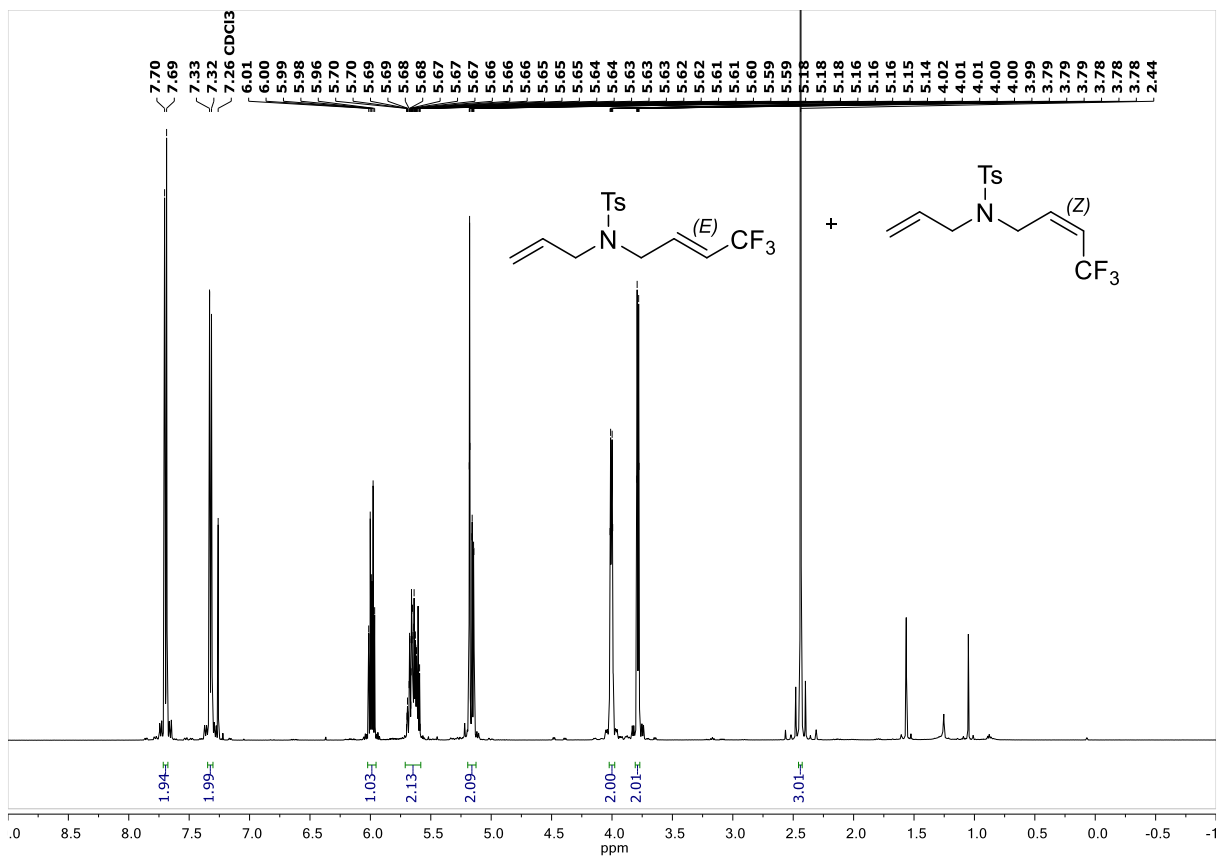

<sup>1</sup>H NMR (CDCl<sub>3</sub>, 500 MHz) of **2i**

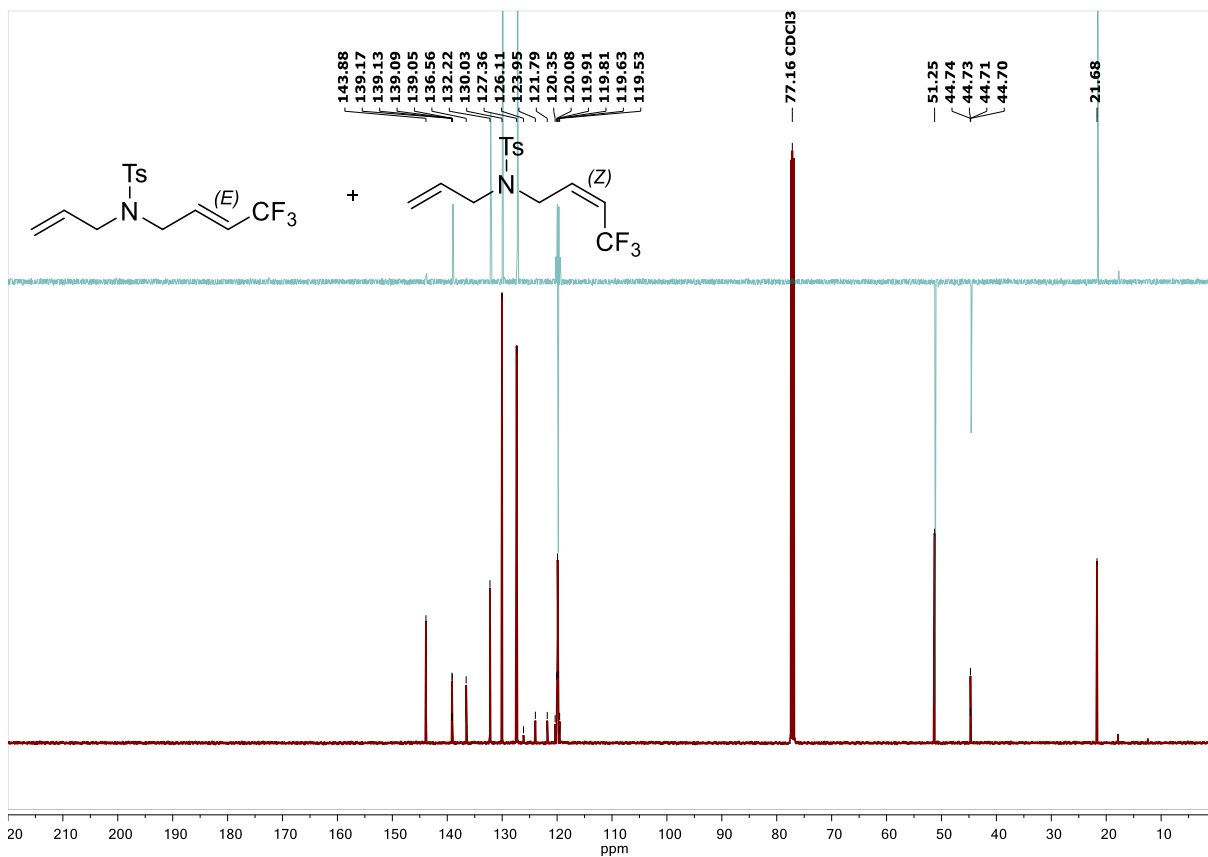

<sup>13</sup>C{<sup>1</sup>H} NMR (CDCl<sub>3</sub>, 126 MHz) of **2i**



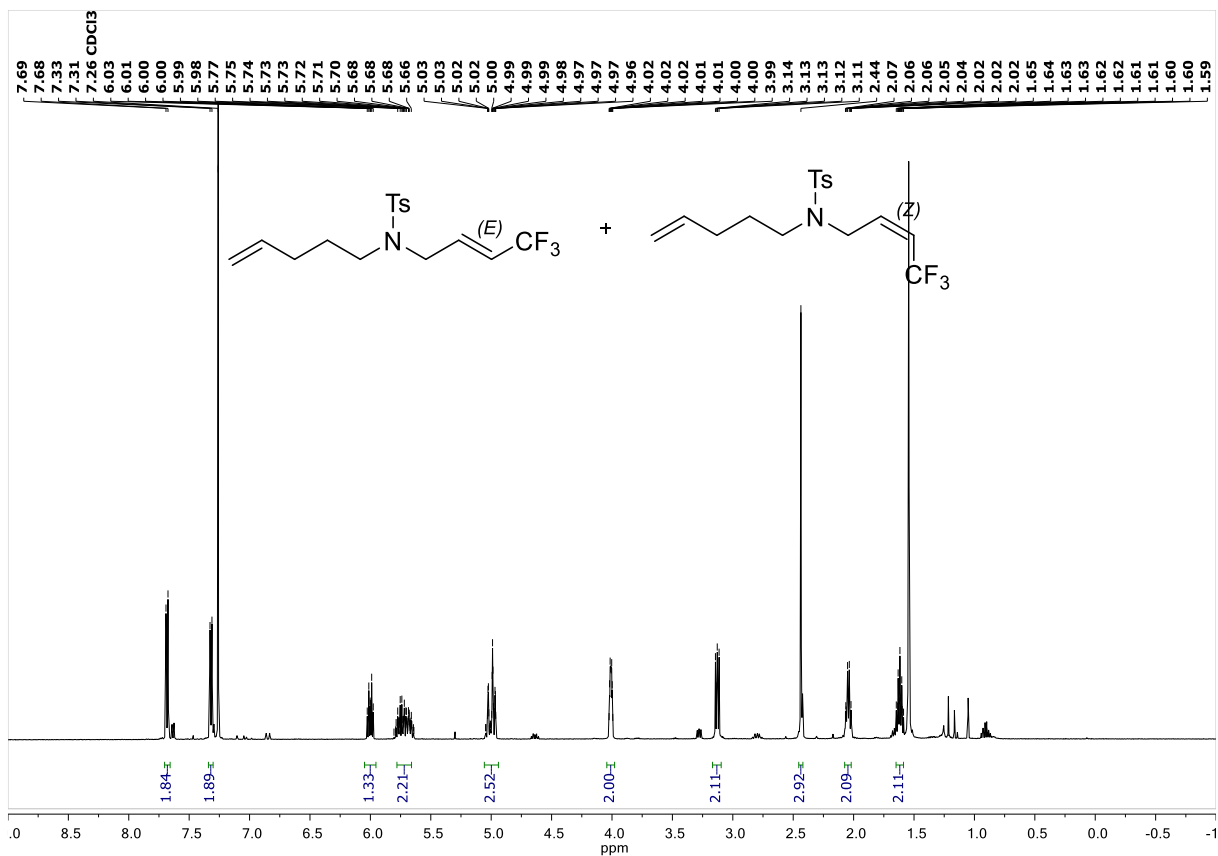

**<sup>1</sup>H NMR (CDCl<sub>3</sub>, 500 MHz) of 2j**

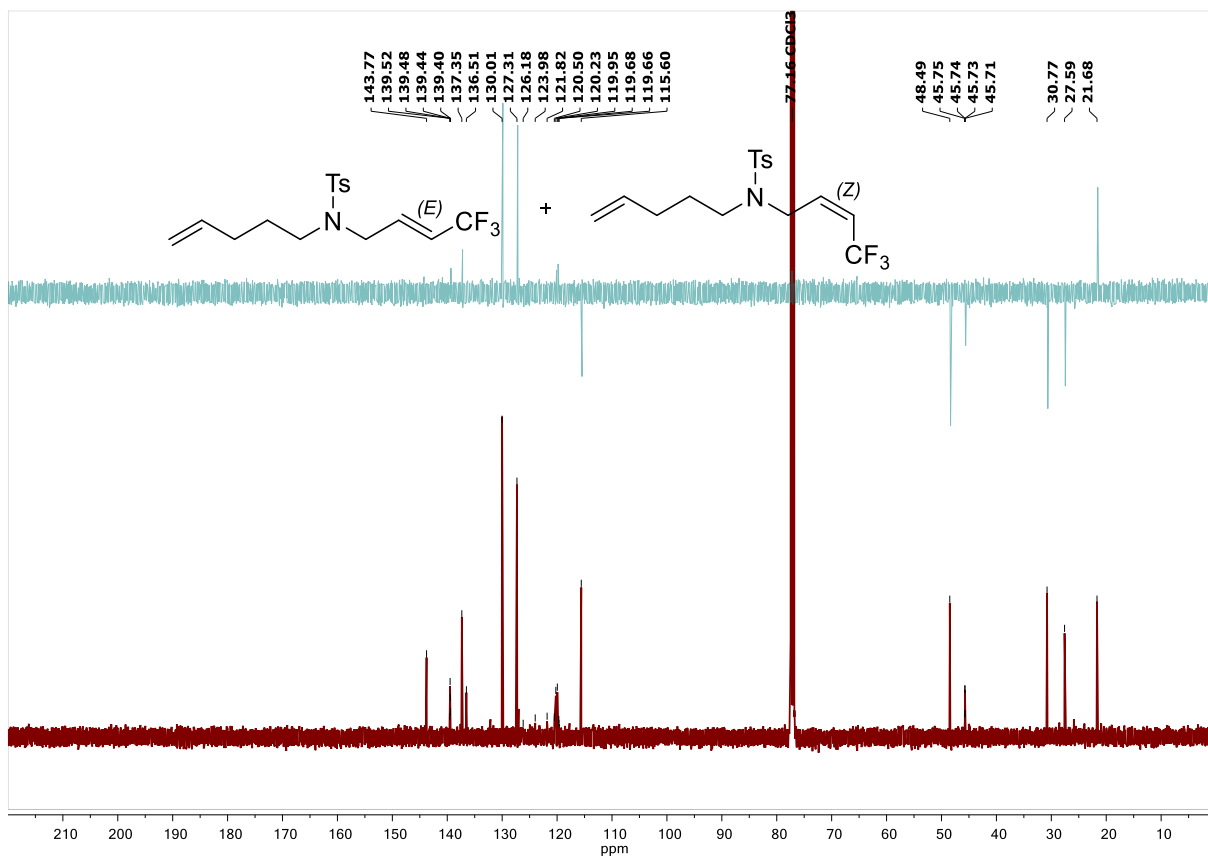

**<sup>13</sup>C{<sup>1</sup>H} NMR (CDCl<sub>3</sub>, 126 MHz) of 2j**

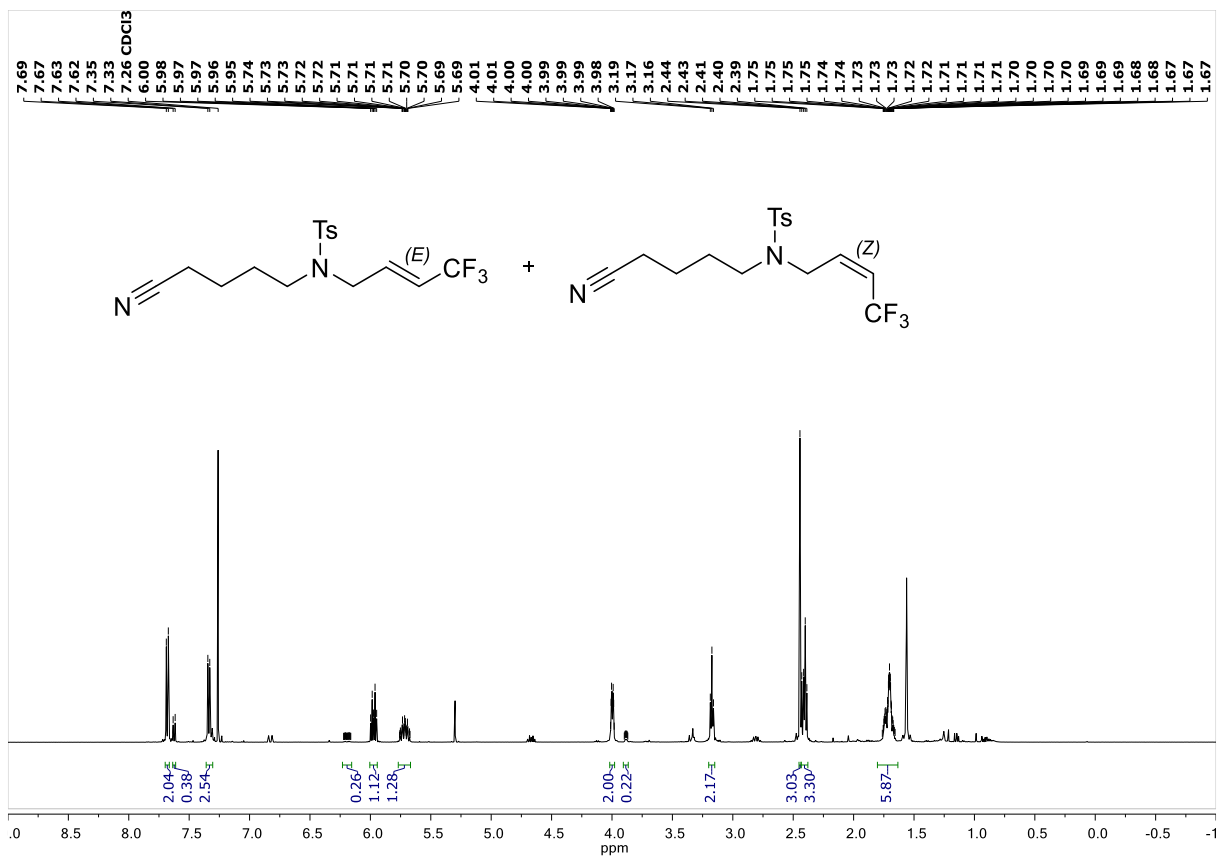

<sup>1</sup>H NMR (CDCl<sub>3</sub>, 500 MHz) of 2k

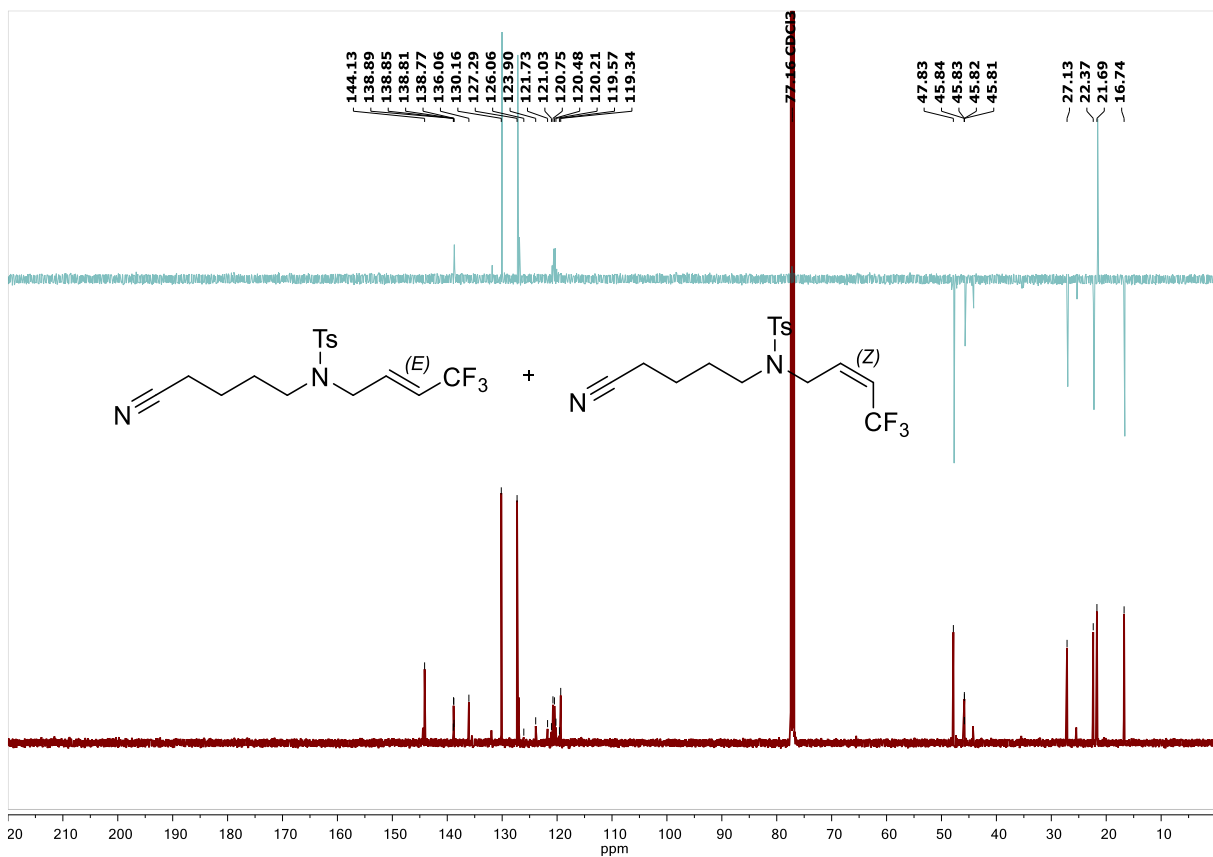

<sup>13</sup>C{<sup>1</sup>H} NMR (CDCl<sub>3</sub>, 126 MHz) of 2k

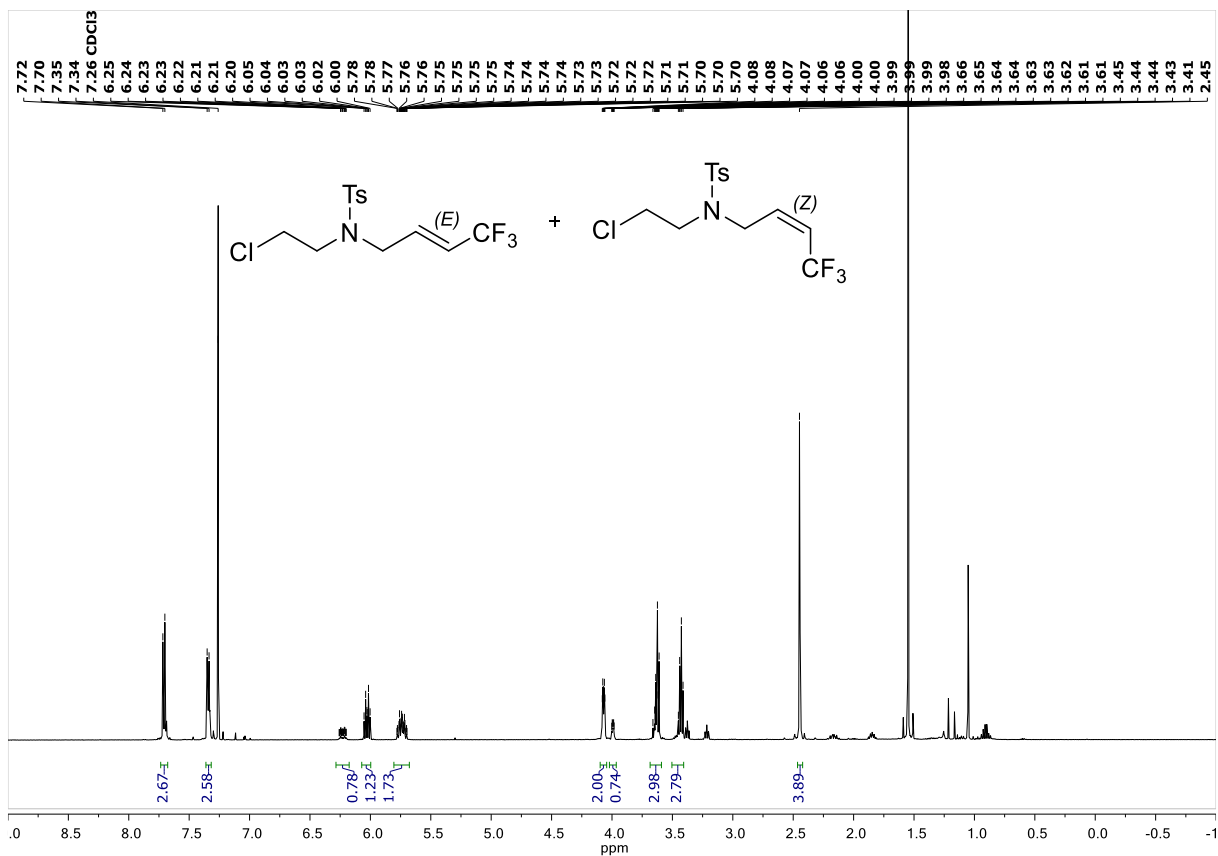

<sup>1</sup>H NMR (CDCl<sub>3</sub>, 500 MHz) of **2I**

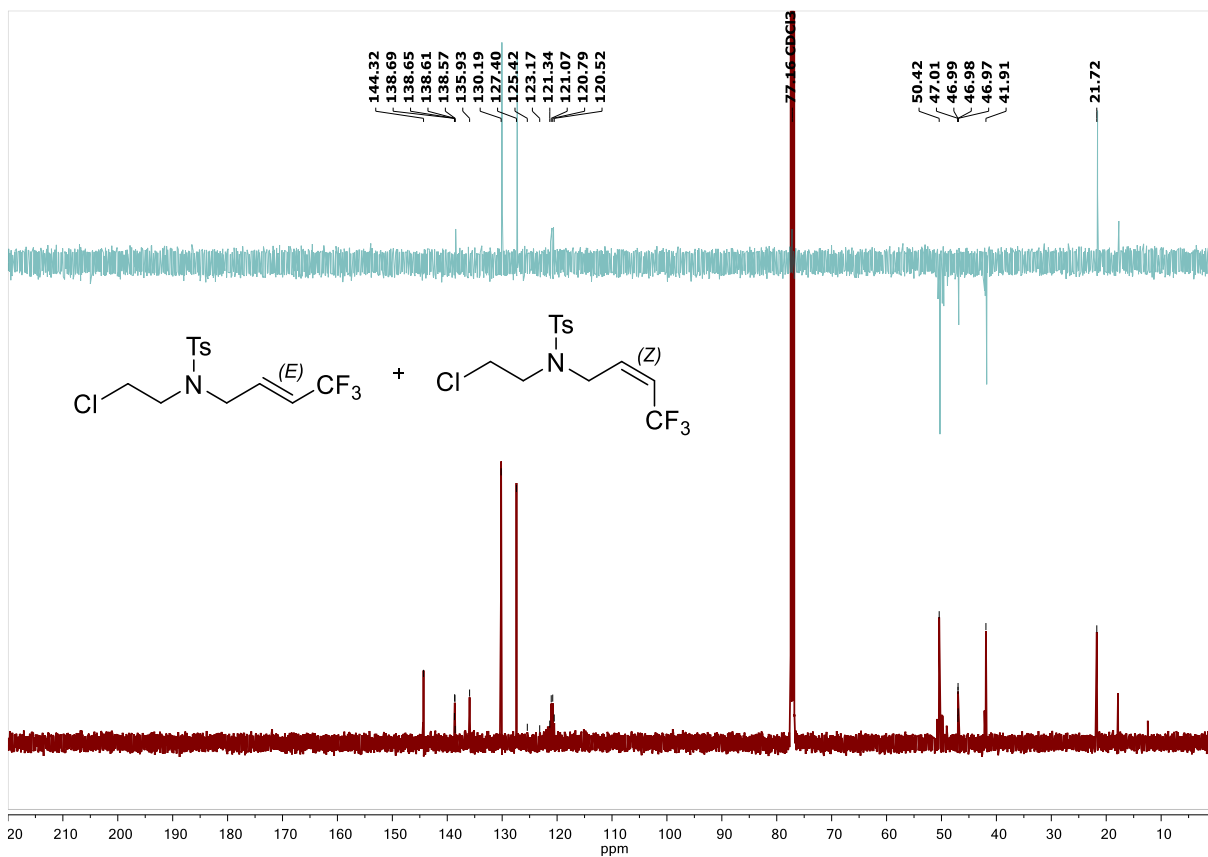

<sup>13</sup>C{<sup>1</sup>H} NMR (CDCl<sub>3</sub>, 126 MHz) of **2I**

S59

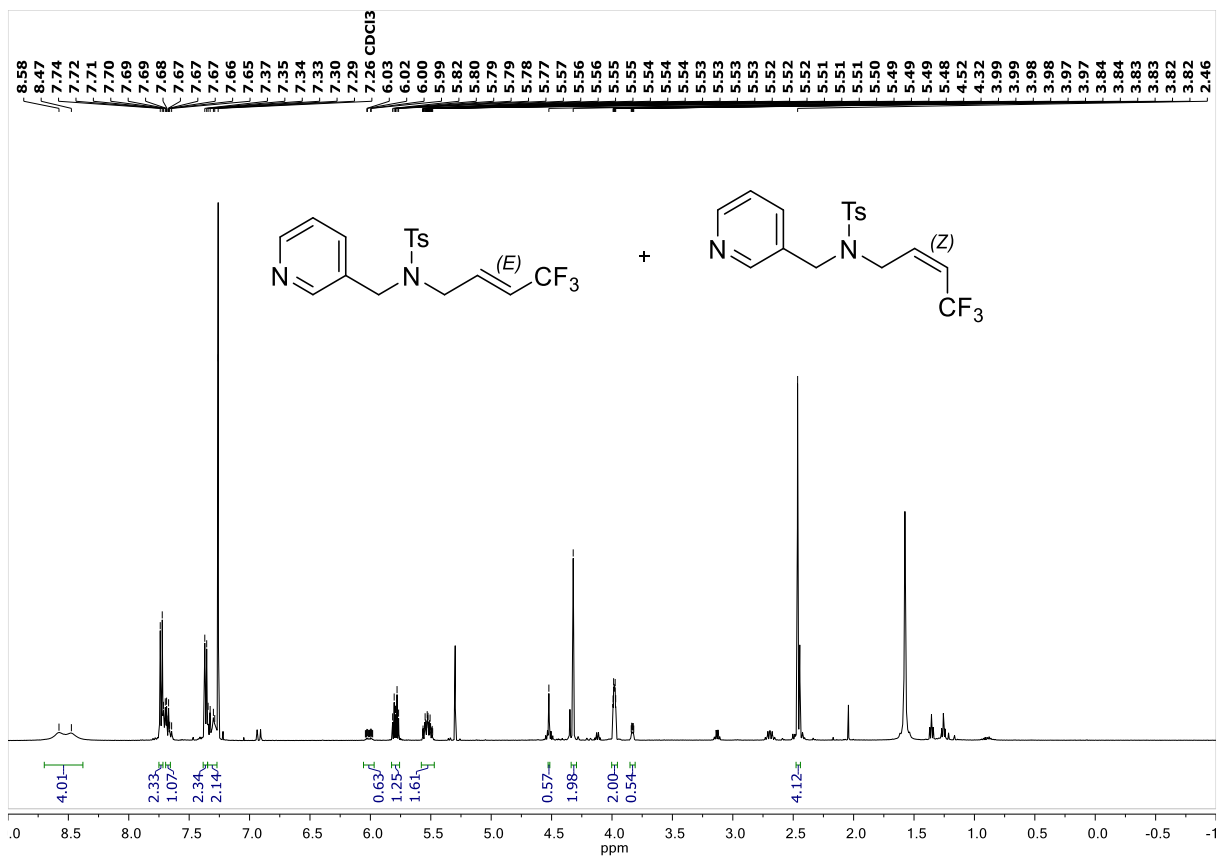

**<sup>1</sup>H NMR (CDCl<sub>3</sub>, 500 MHz) of 2m**

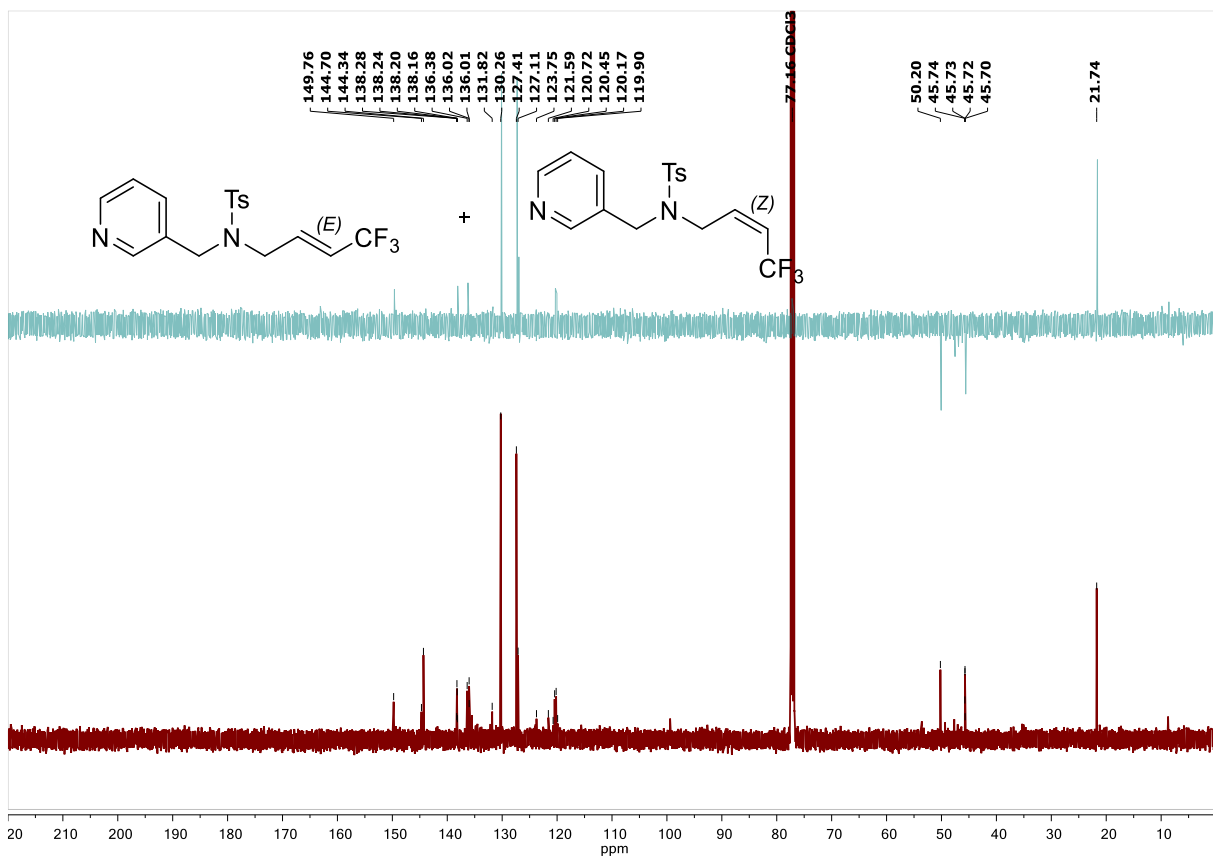

**<sup>13</sup>C{<sup>1</sup>H} NMR (CDCl<sub>3</sub>, 126 MHz) of 2m**  
S60

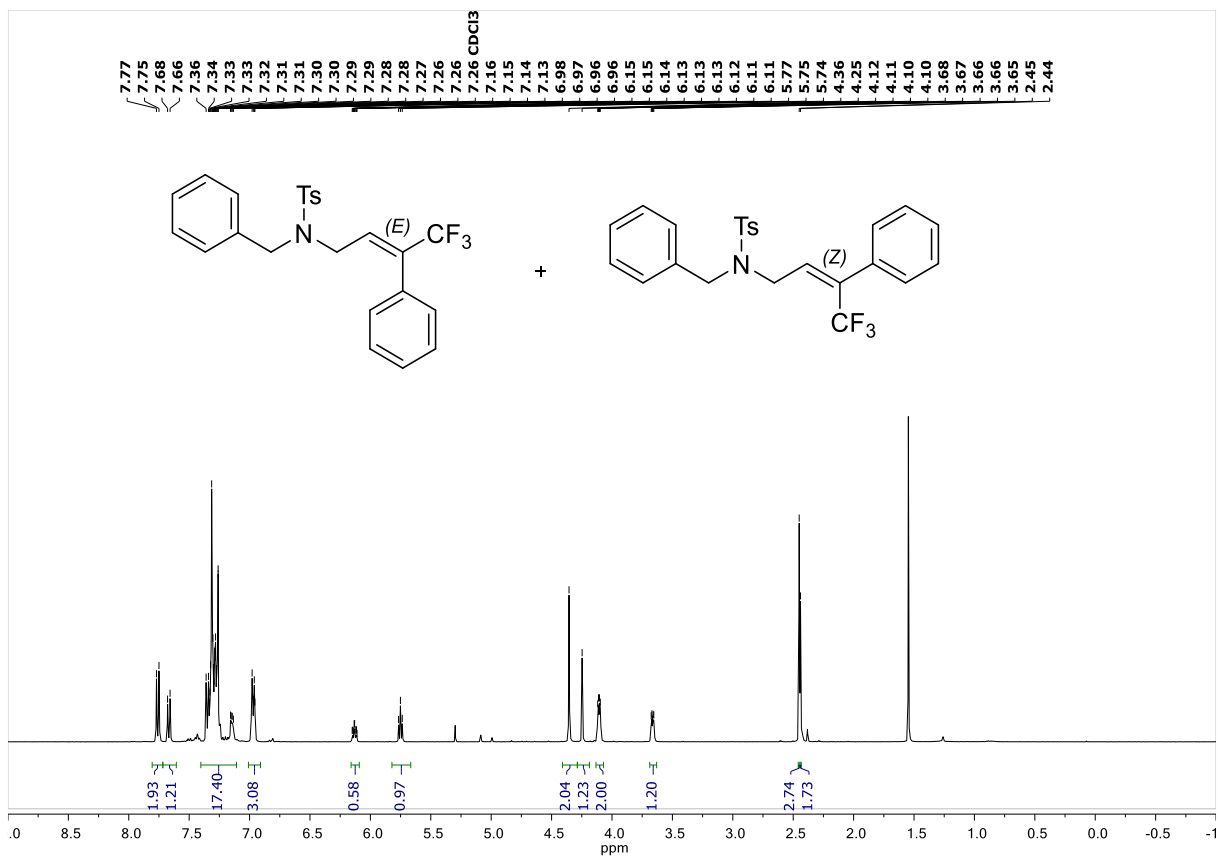

<sup>1</sup>H NMR (CDCl<sub>3</sub>, 400 MHz) of 2n

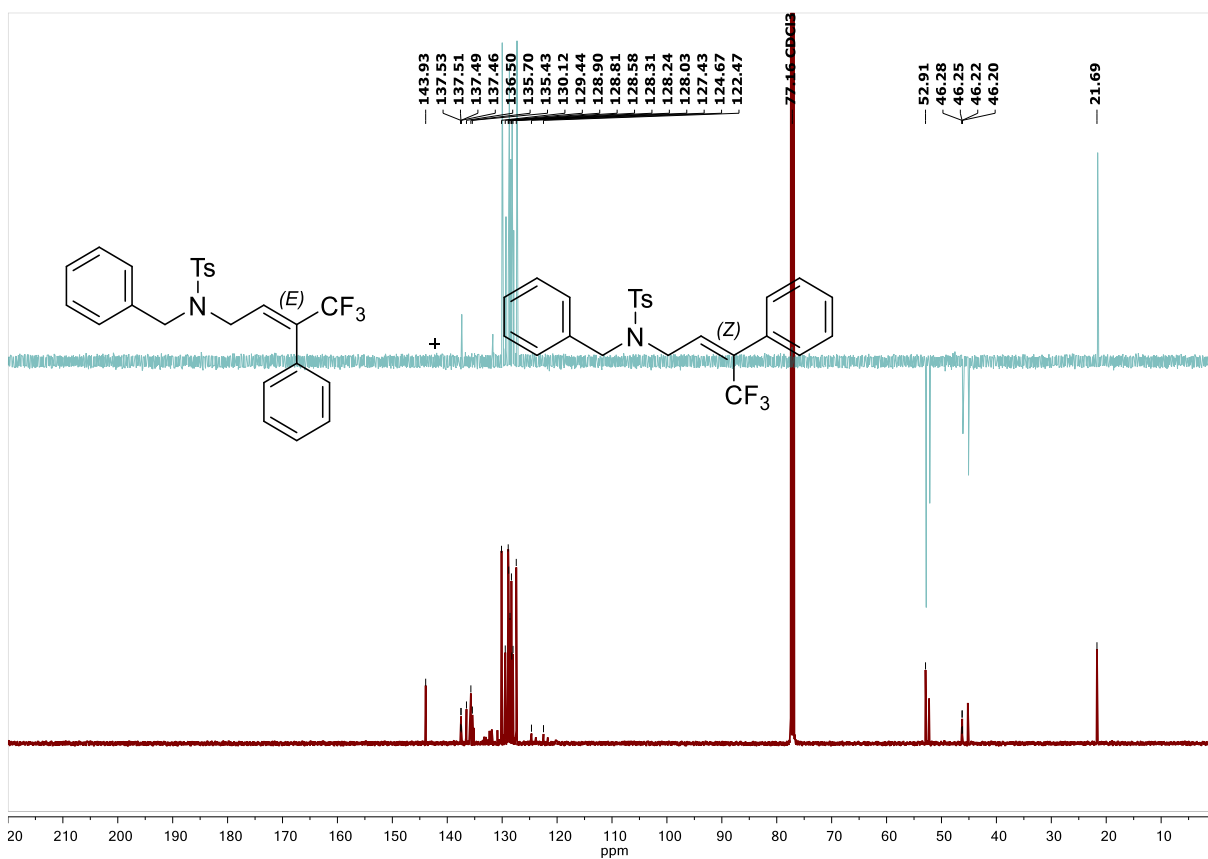

<sup>13</sup>C{<sup>1</sup>H} NMR (CDCl<sub>3</sub>, 126 MHz) of 2n

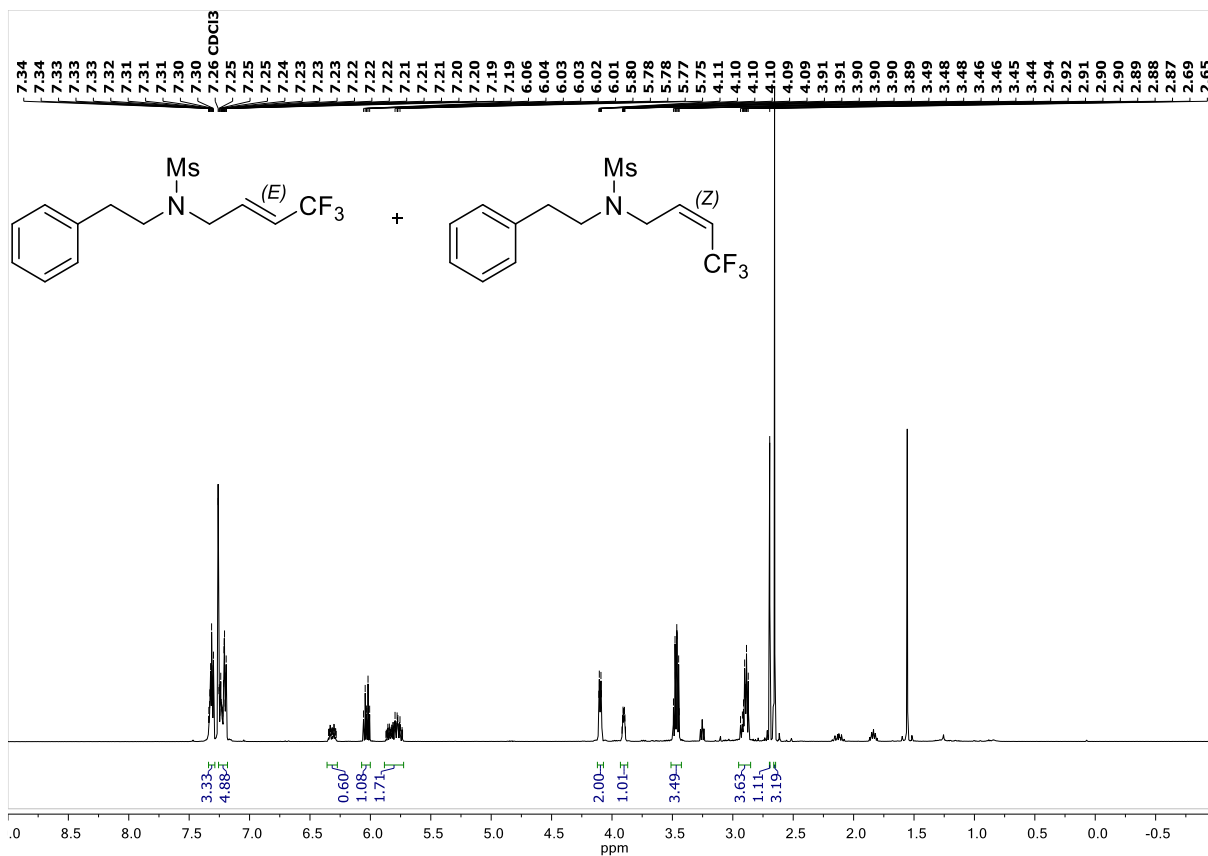

**<sup>1</sup>H NMR (CDCl<sub>3</sub>, 500 MHz) of **2o****

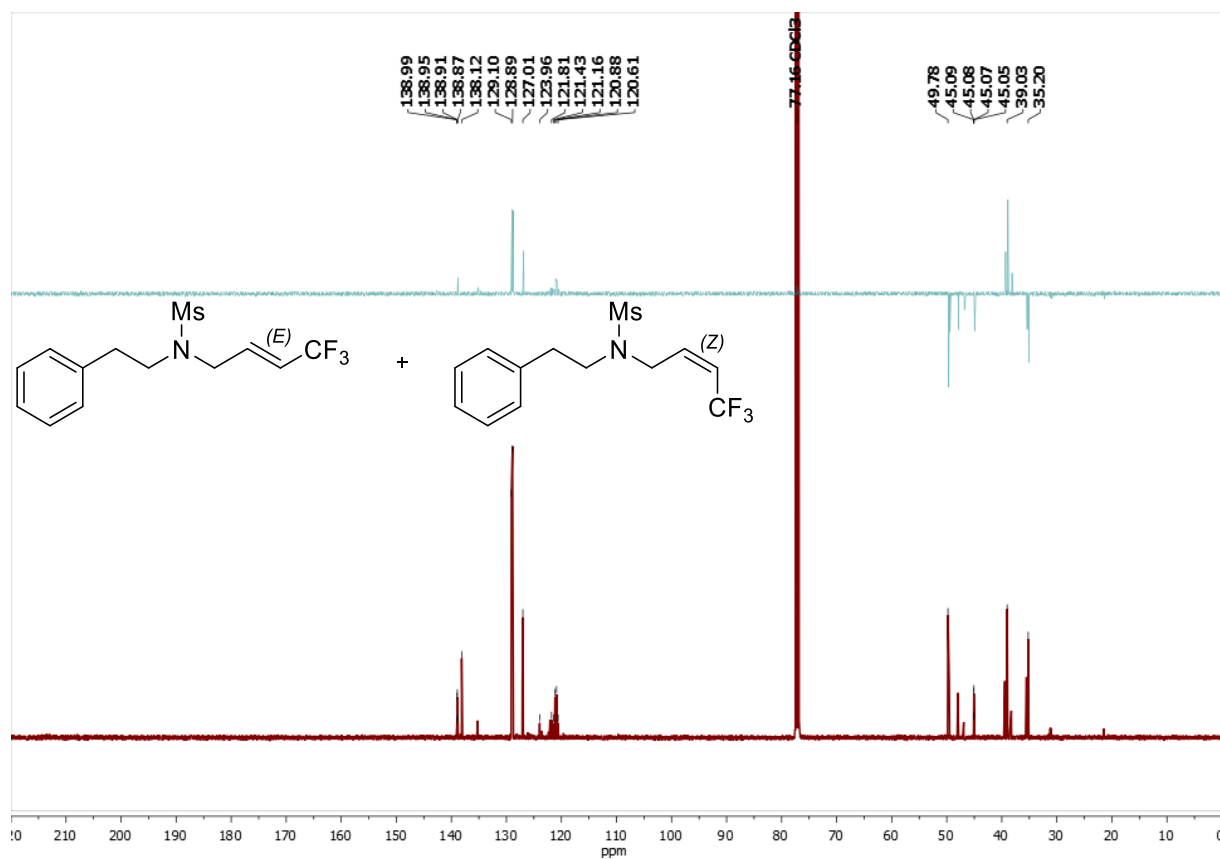

**<sup>13</sup>C{<sup>1</sup>H} NMR (CDCl<sub>3</sub>, 126 MHz) of **2o****

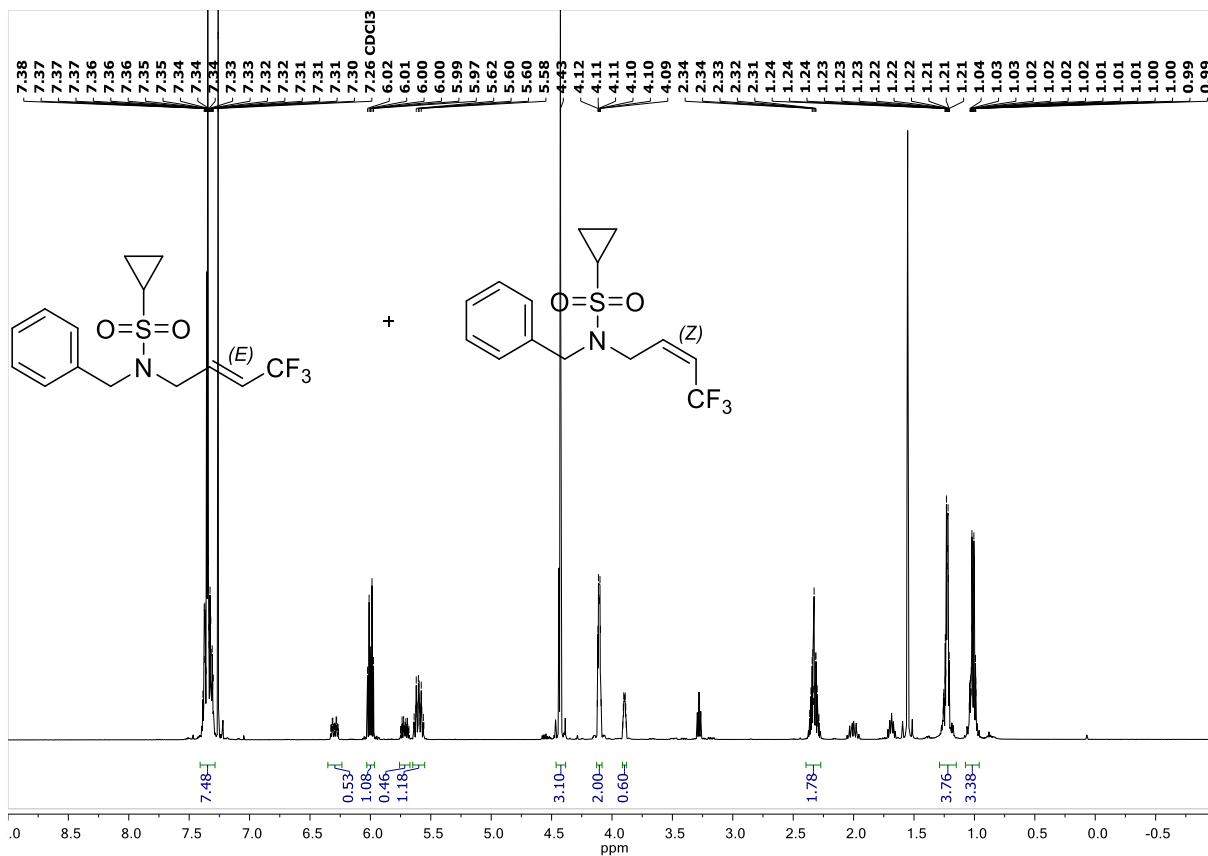

**<sup>1</sup>H NMR (CDCl<sub>3</sub>, 500 MHz) of 2p**

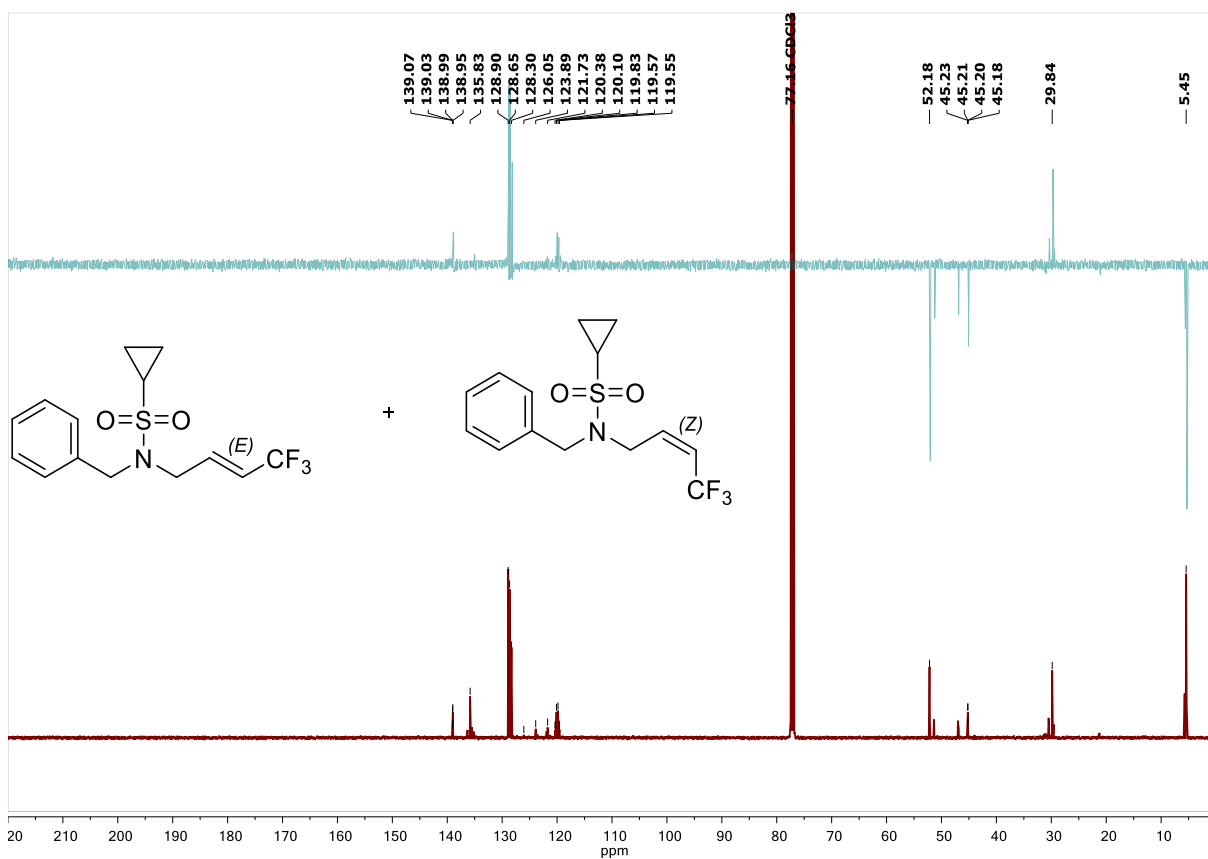

**<sup>13</sup>C{<sup>1</sup>H} NMR (CDCl<sub>3</sub>, 126 MHz) of 2p**  
S63

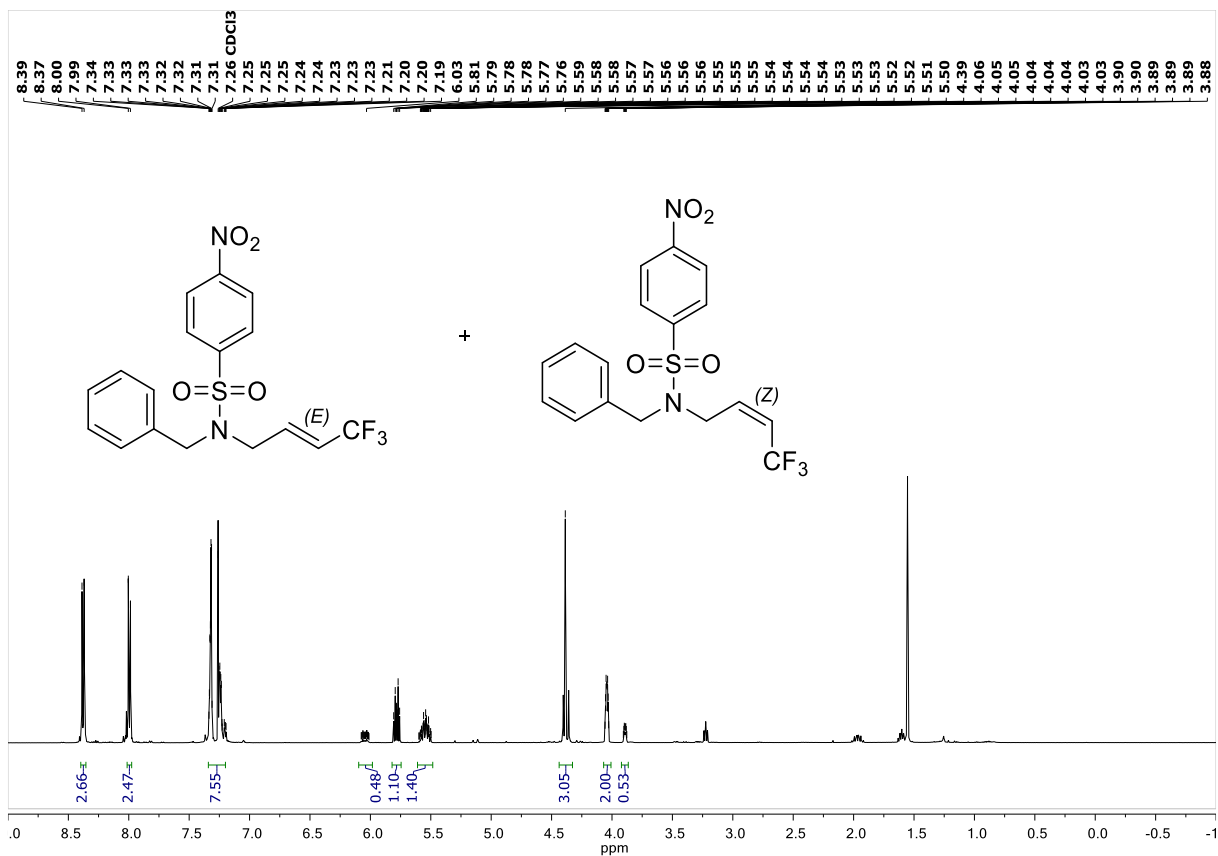

$^1\text{H NMR}$  ( $\text{CDCl}_3$ , 500 MHz) of **2q**

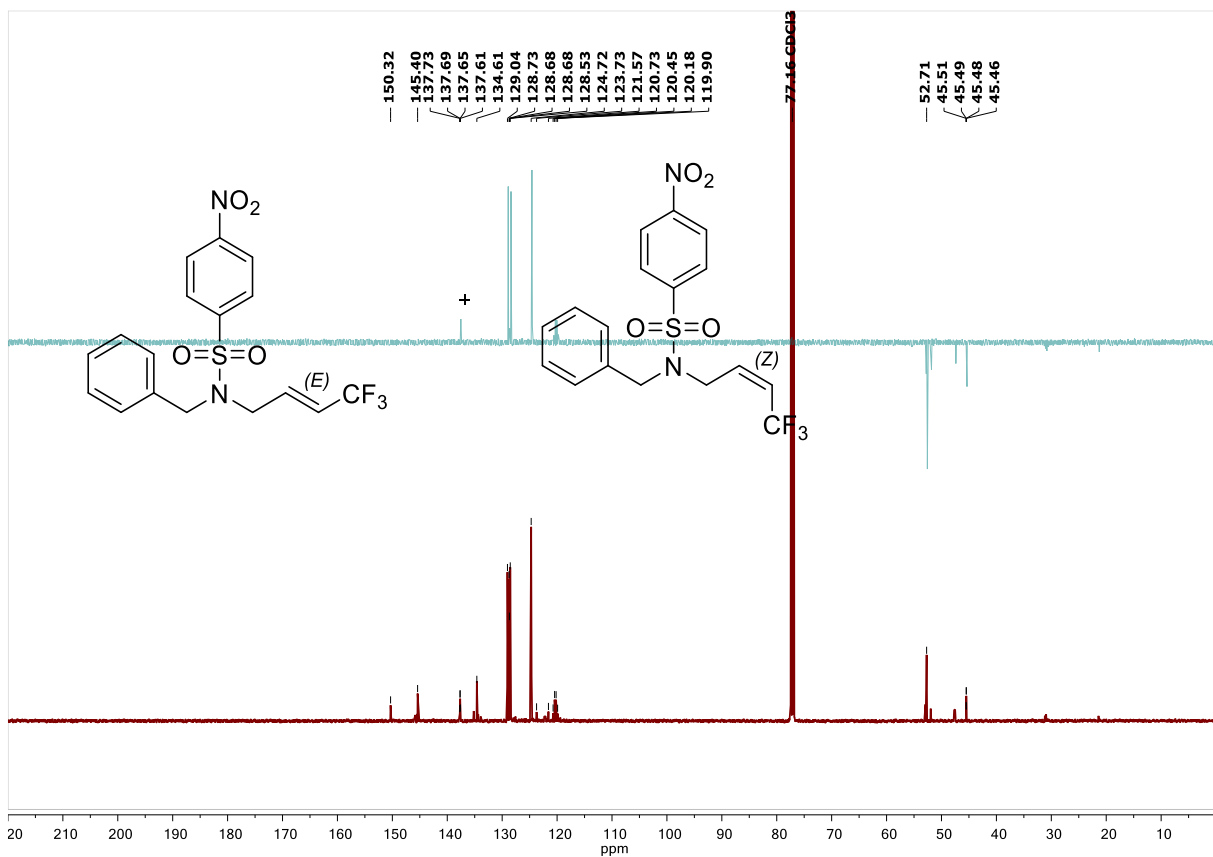

$^{13}\text{C}\{^1\text{H}\}$  NMR ( $\text{CDCl}_3$ , 126 MHz) of **2q**  
S64



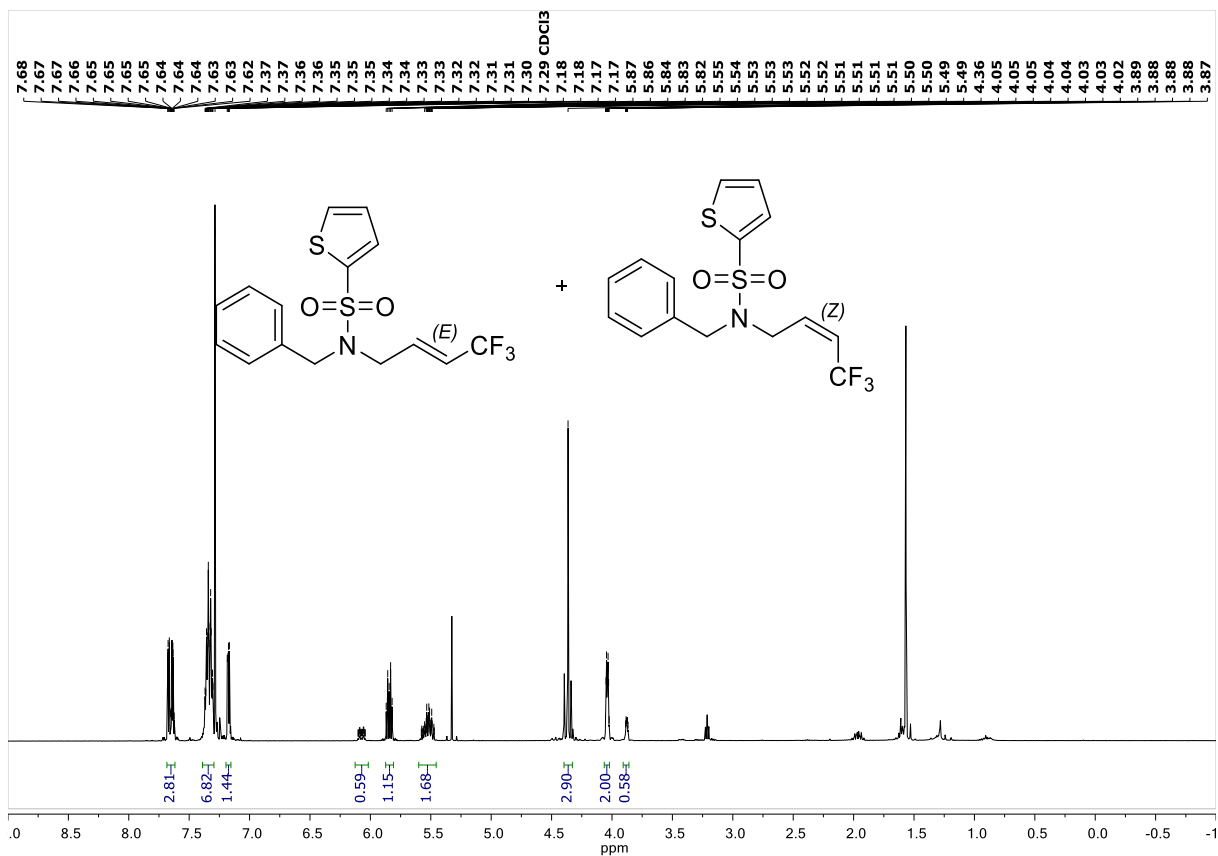

**<sup>1</sup>H NMR (CDCl<sub>3</sub>, 500 MHz) of 2r**

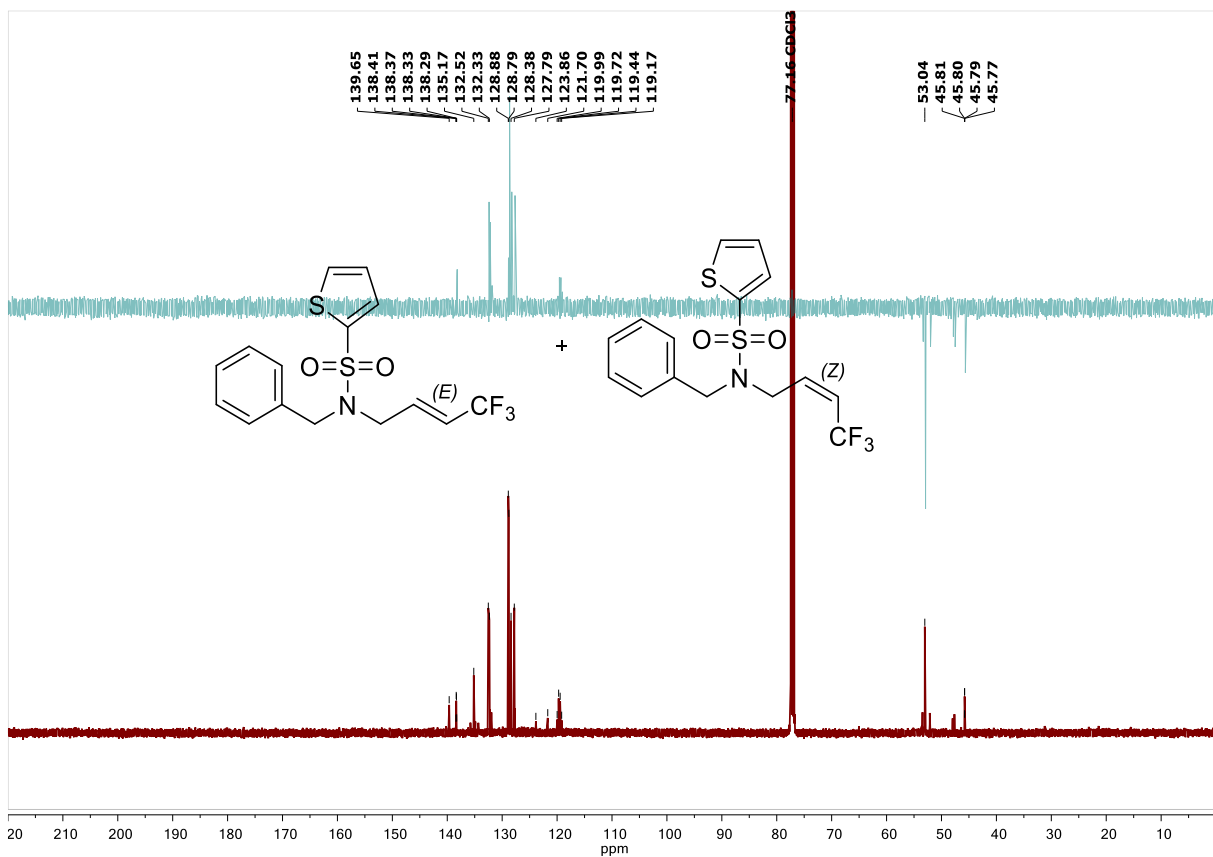

**<sup>13</sup>C{<sup>1</sup>H} NMR (CDCl<sub>3</sub>, 126 MHz) of 2r**  
S65

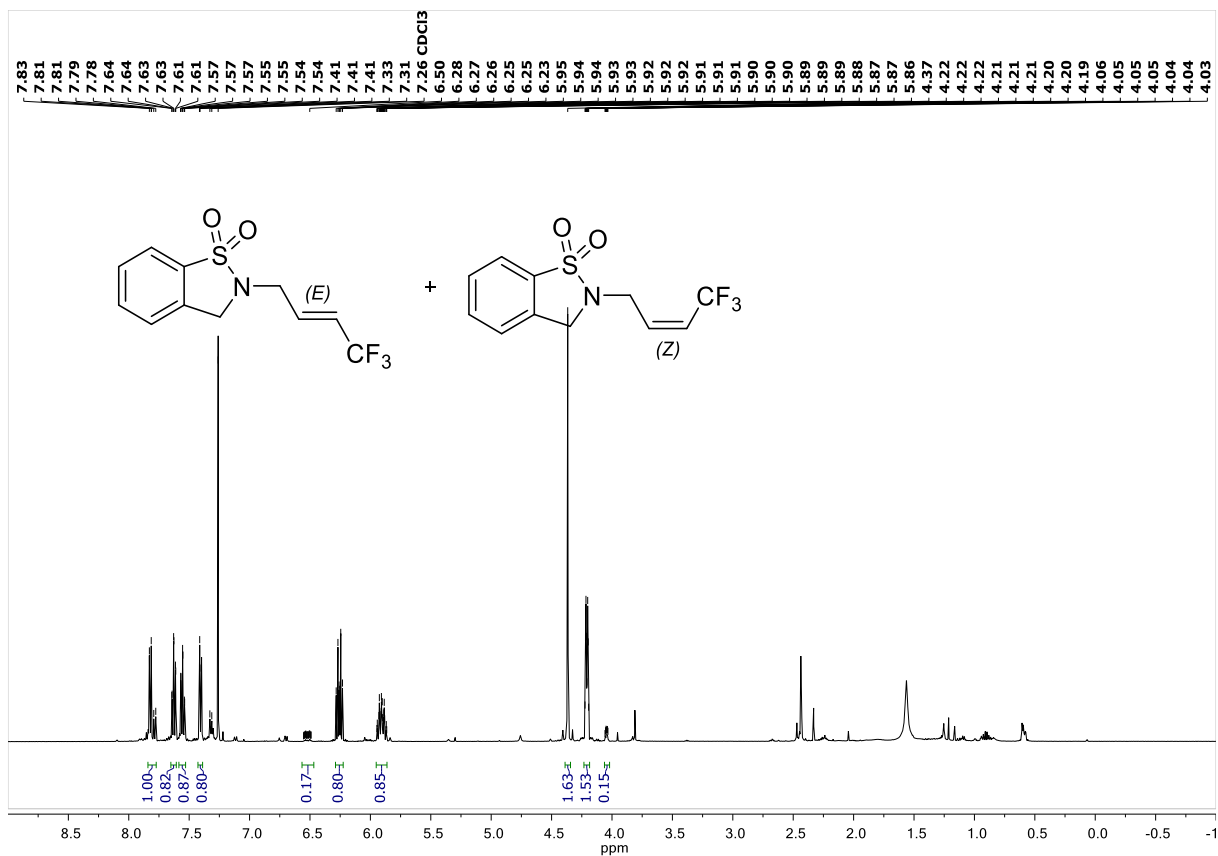

**<sup>1</sup>H NMR (CDCl<sub>3</sub>, 500 MHz) of 2s**

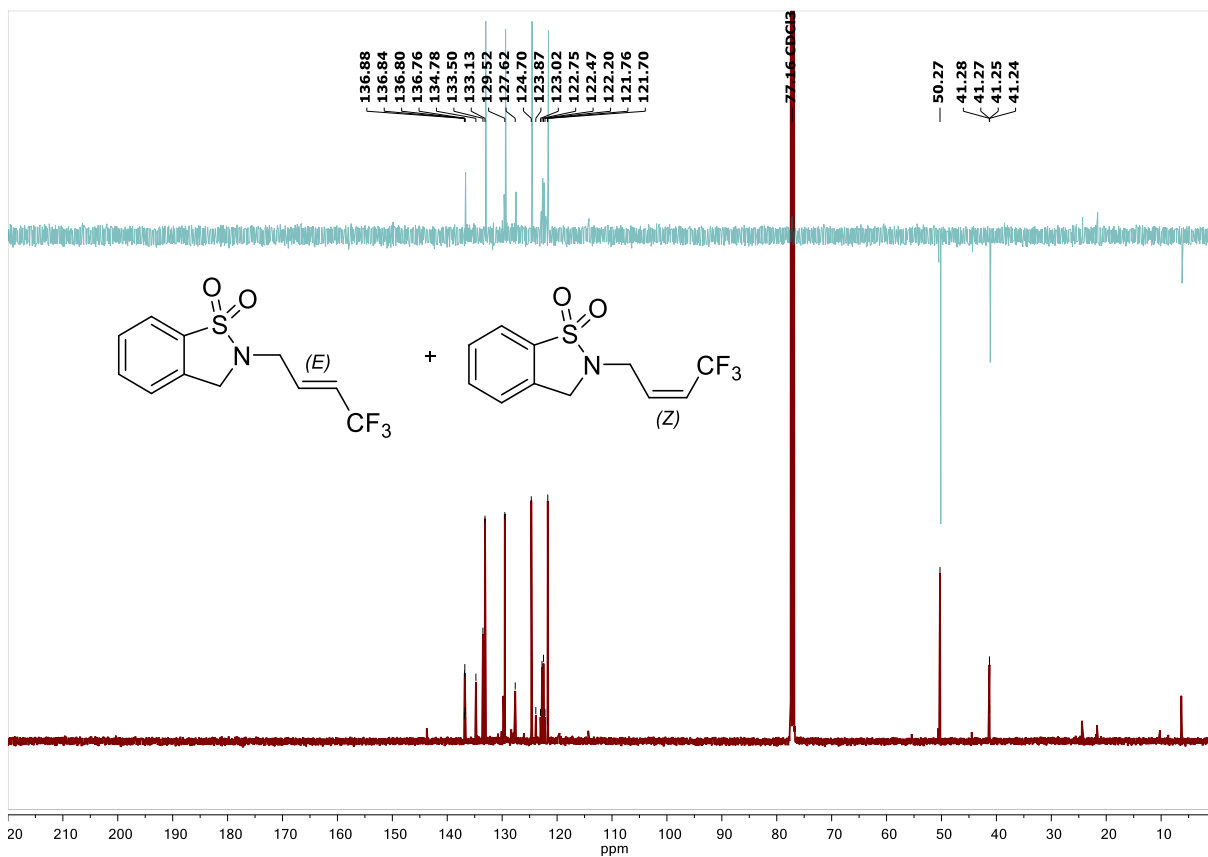

**<sup>13</sup>C{<sup>1</sup>H} NMR (CDCl<sub>3</sub>, 126 MHz) of 2s**  
S66

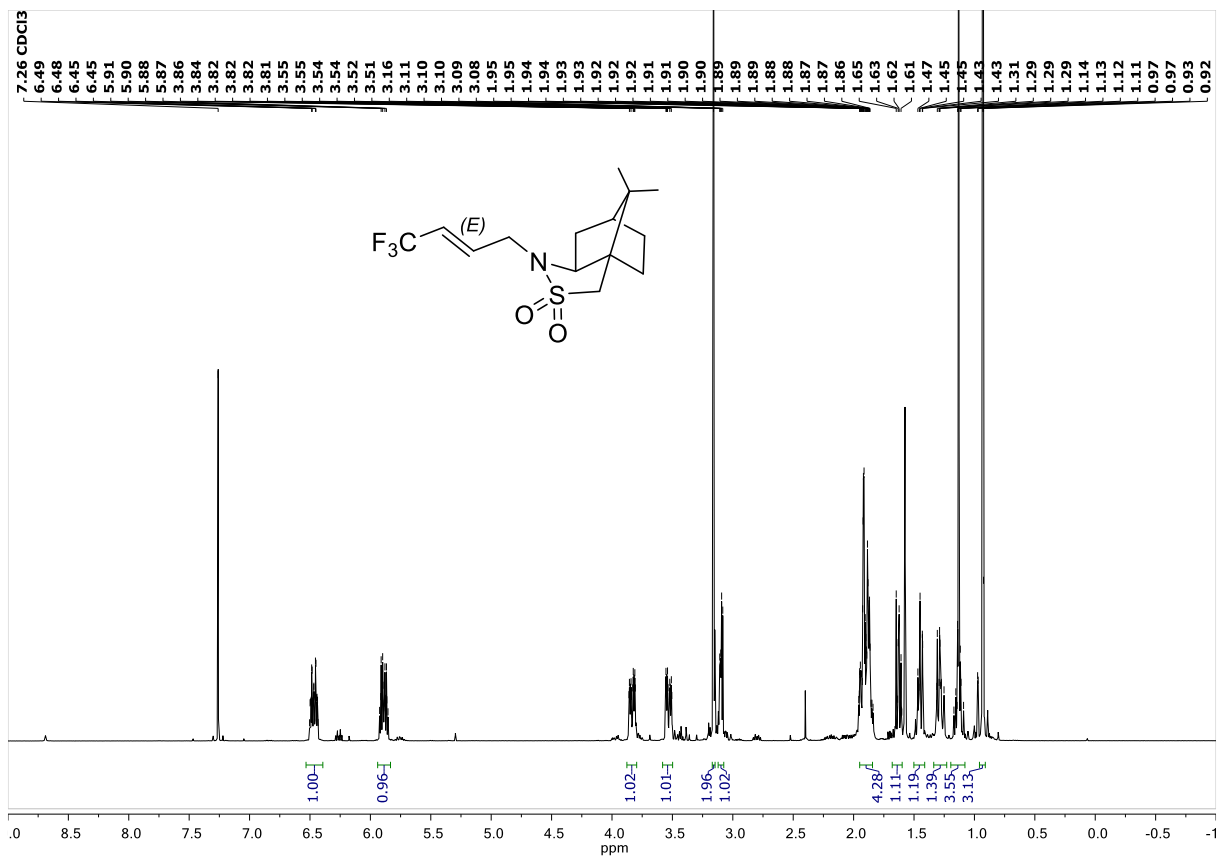

**<sup>1</sup>H NMR (CDCl<sub>3</sub>, 500 MHz) of 2t-E**

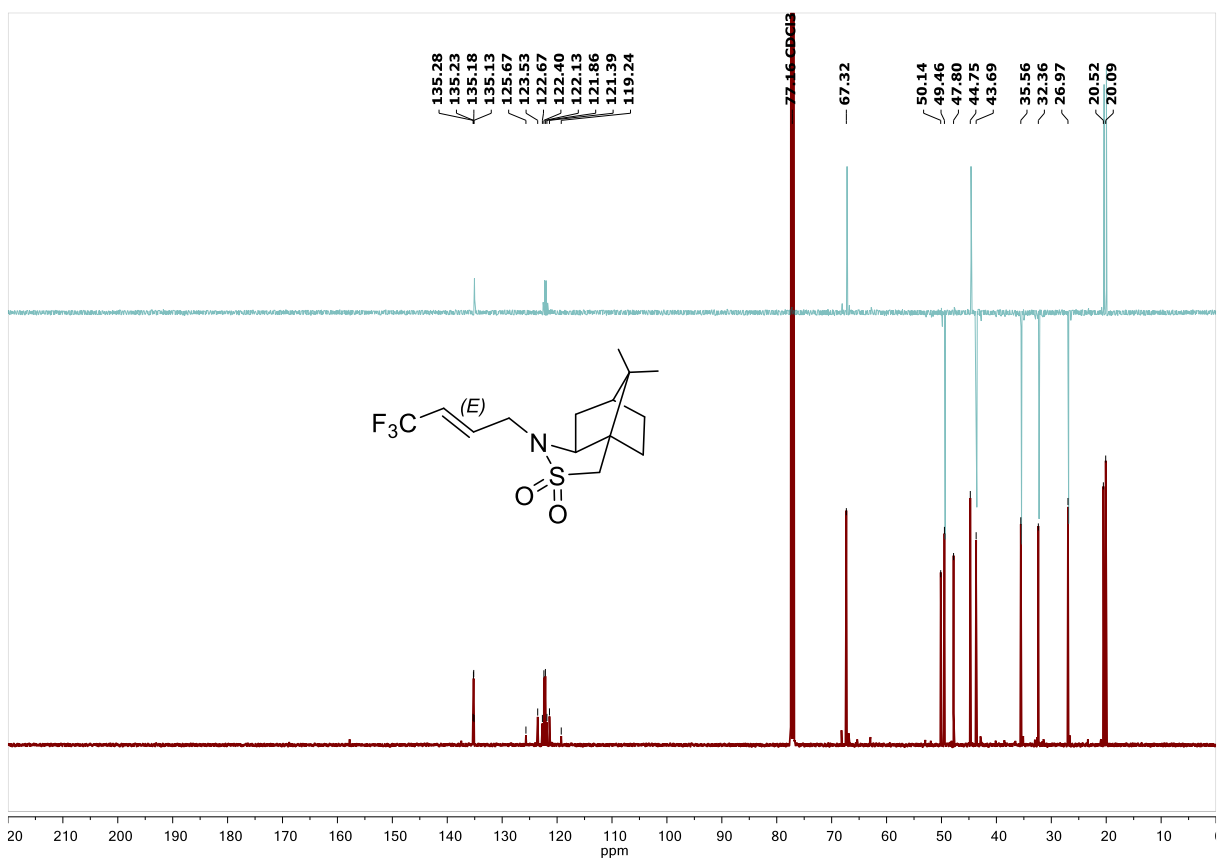

**<sup>13</sup>C{<sup>1</sup>H} NMR (CDCl<sub>3</sub>, 126 MHz) of 2t-E**  
S67

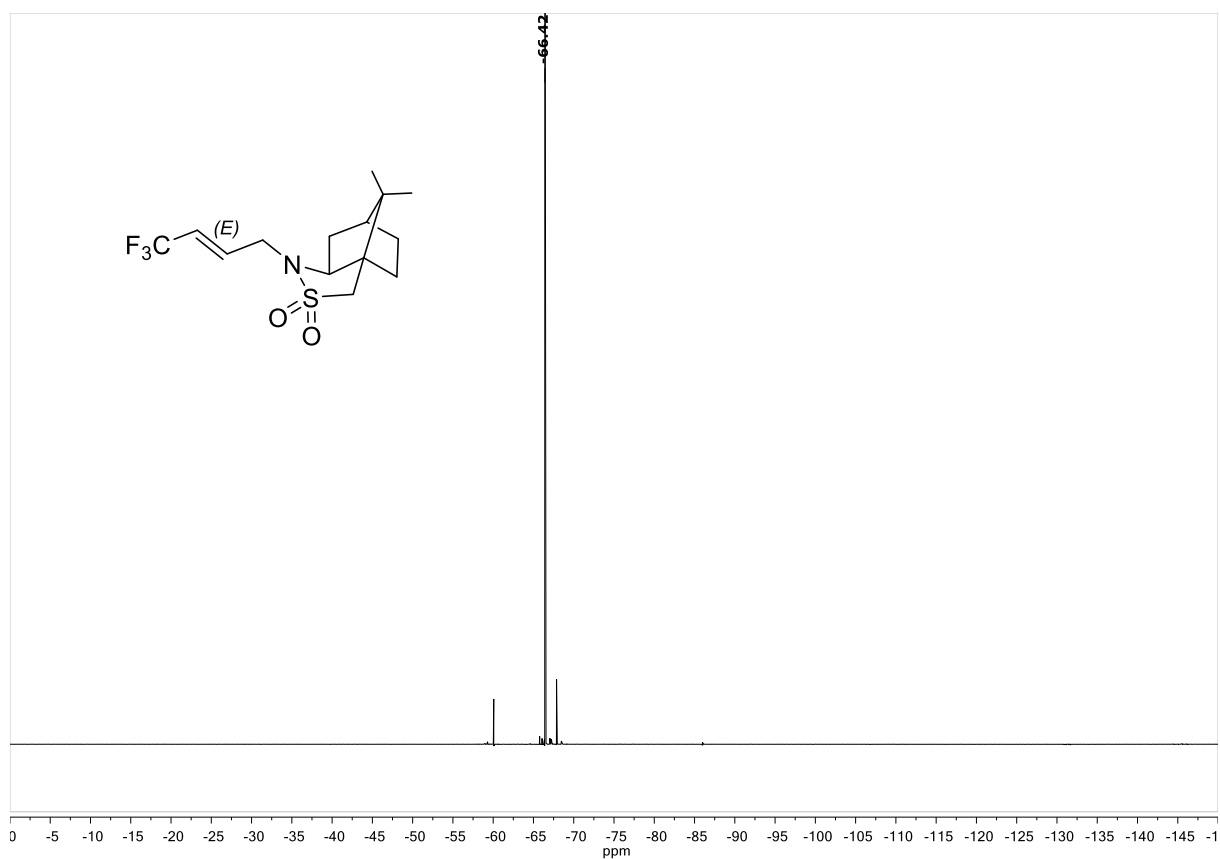

$^{19}\text{F}\{^1\text{H}\}$  NMR ( $\text{CDCl}_3$ , 282 MHz) of **2t-E**

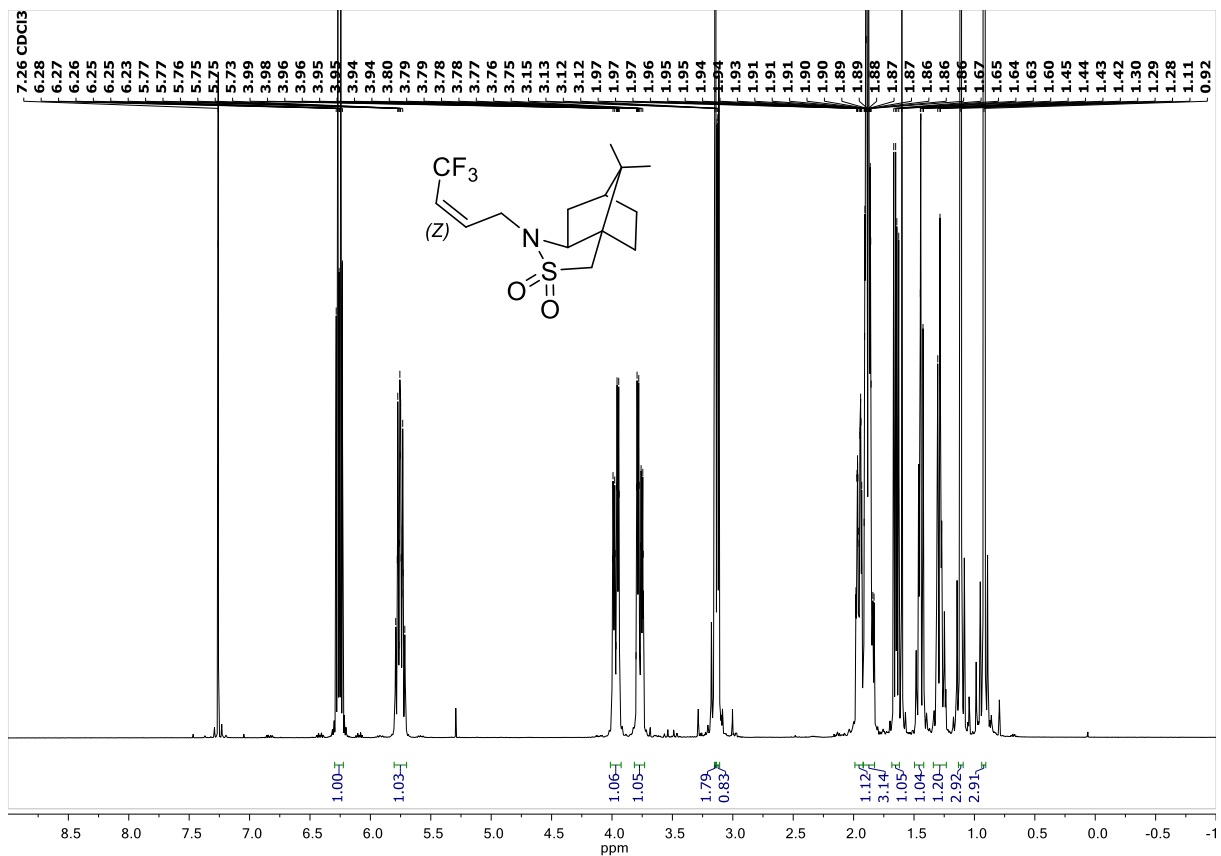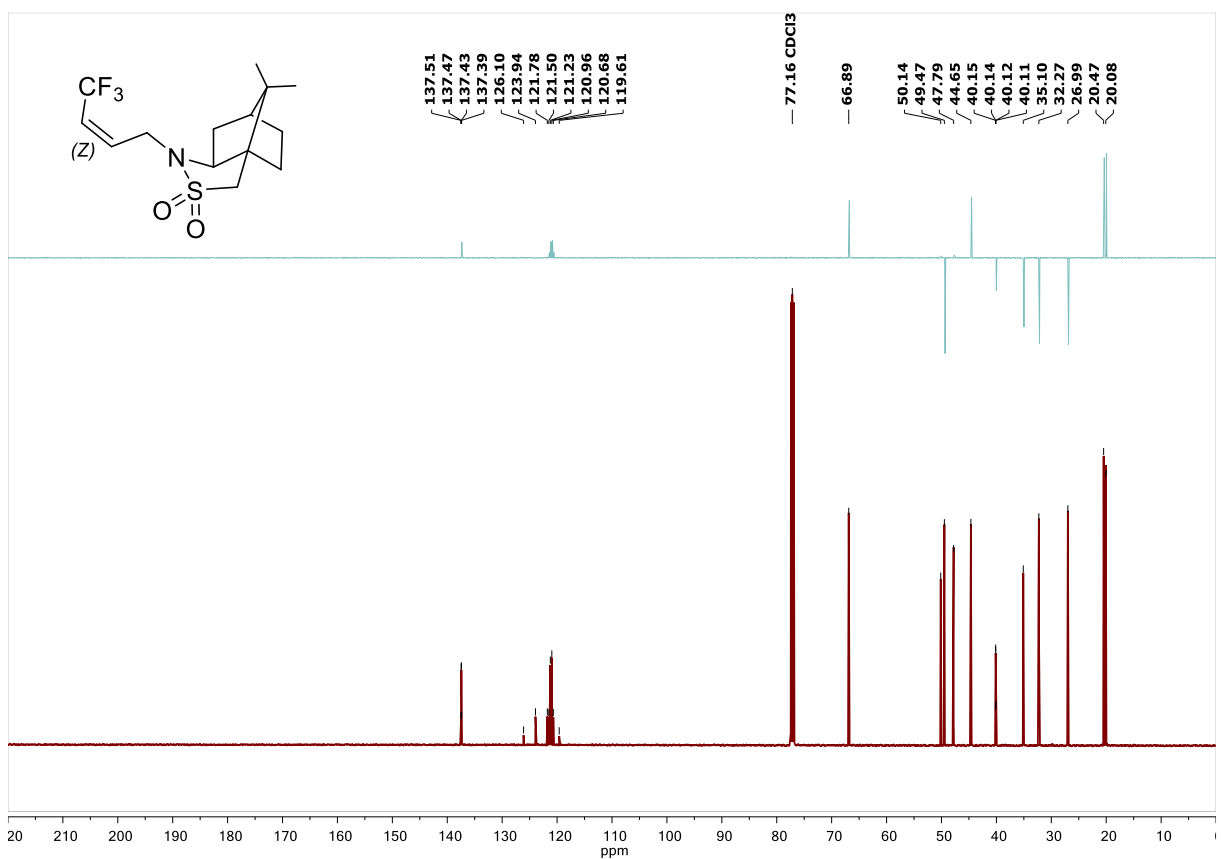

**<sup>13</sup>C{<sup>1</sup>H} NMR (CDCl<sub>3</sub>, 126 MHz) of 2t-Z**  
S69

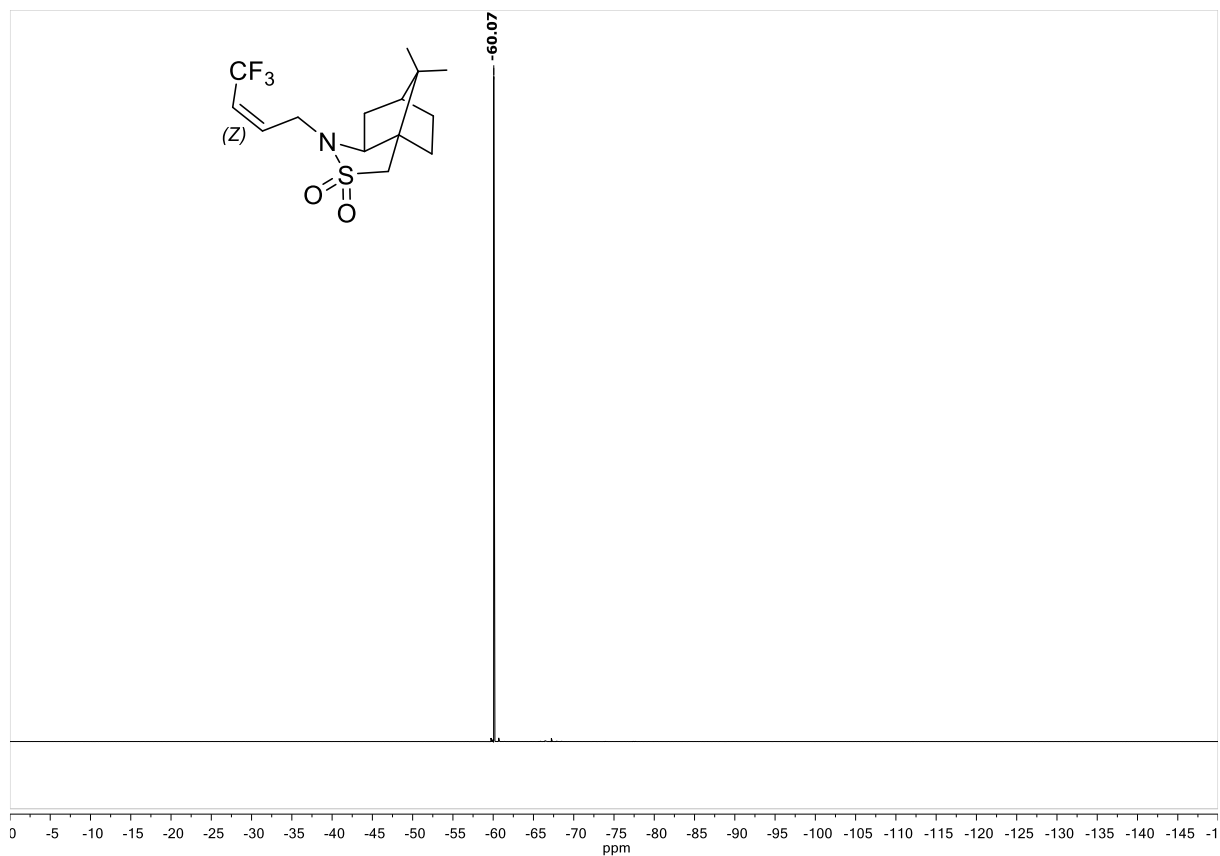

$^{19}\text{F}\{^1\text{H}\}$  NMR ( $\text{CDCl}_3$ , 282 MHz) of **2t-Z**

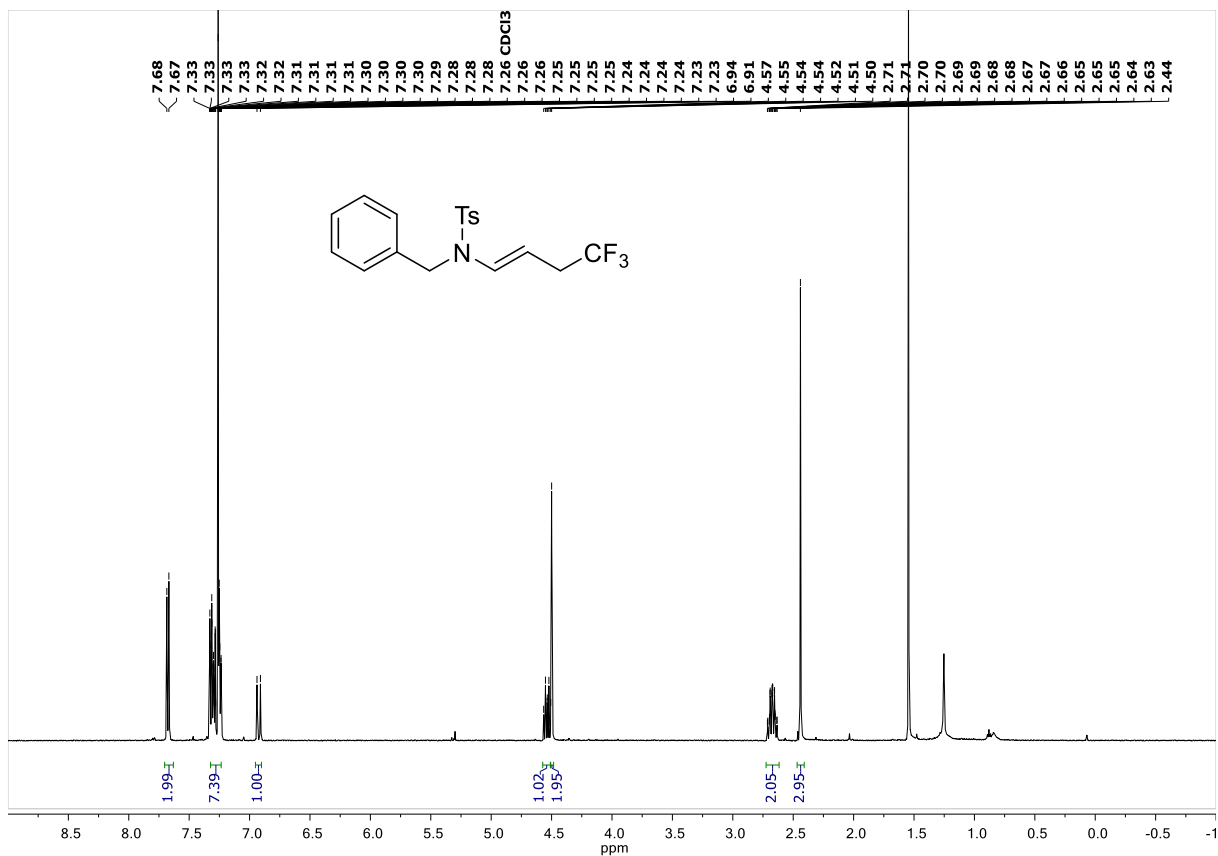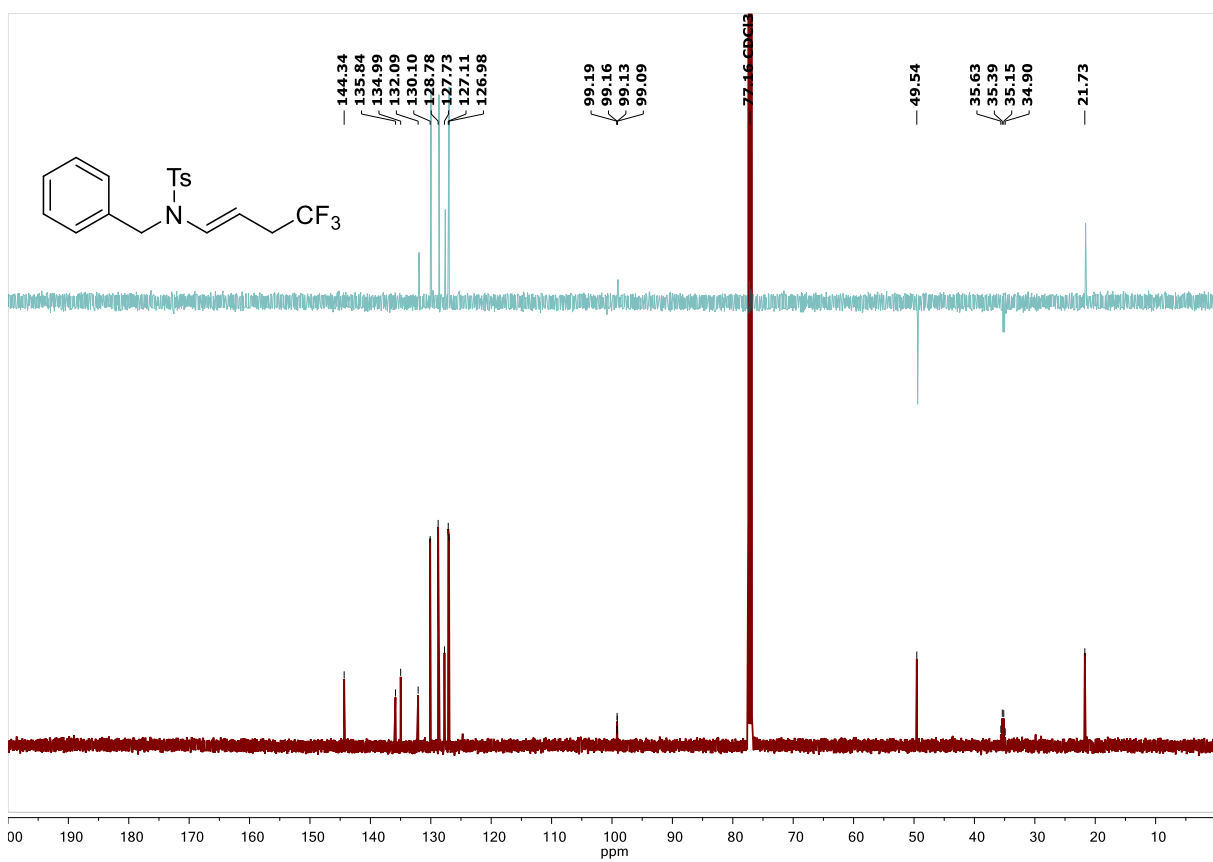

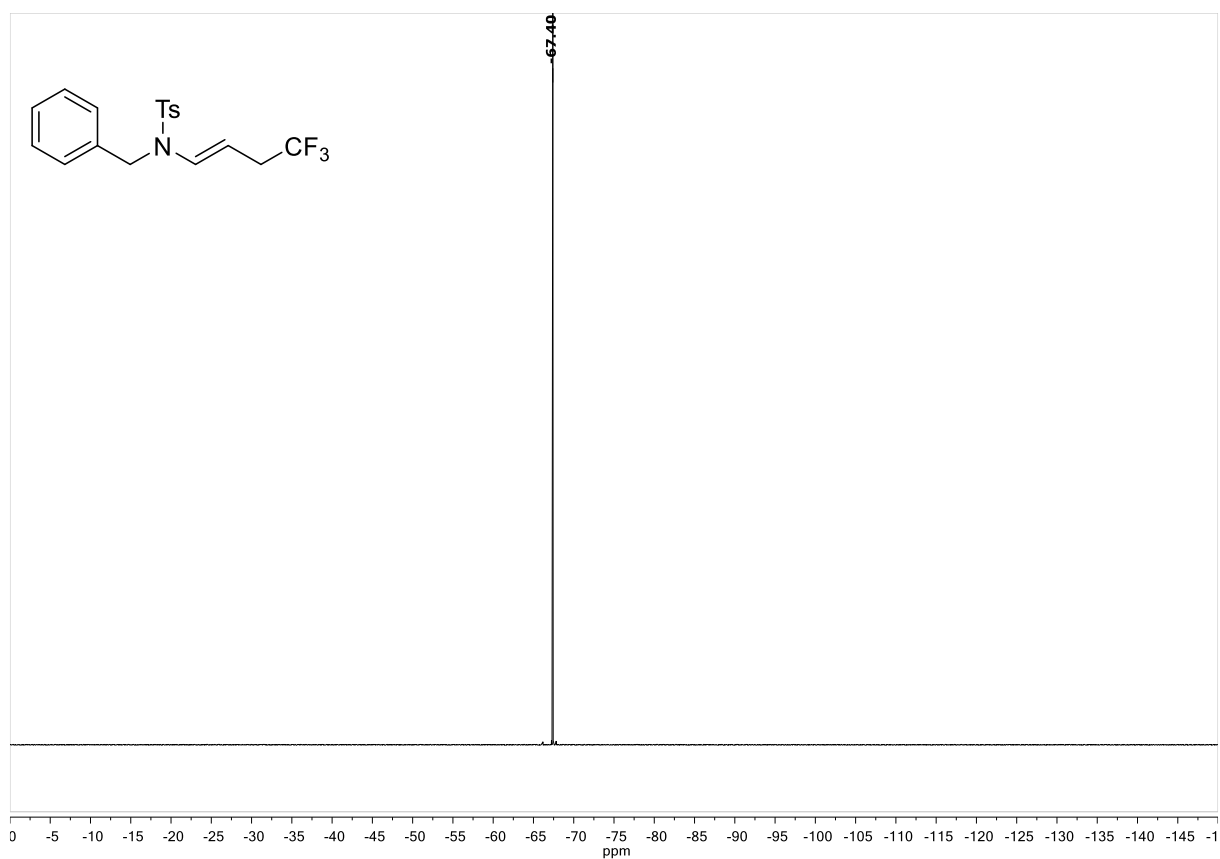



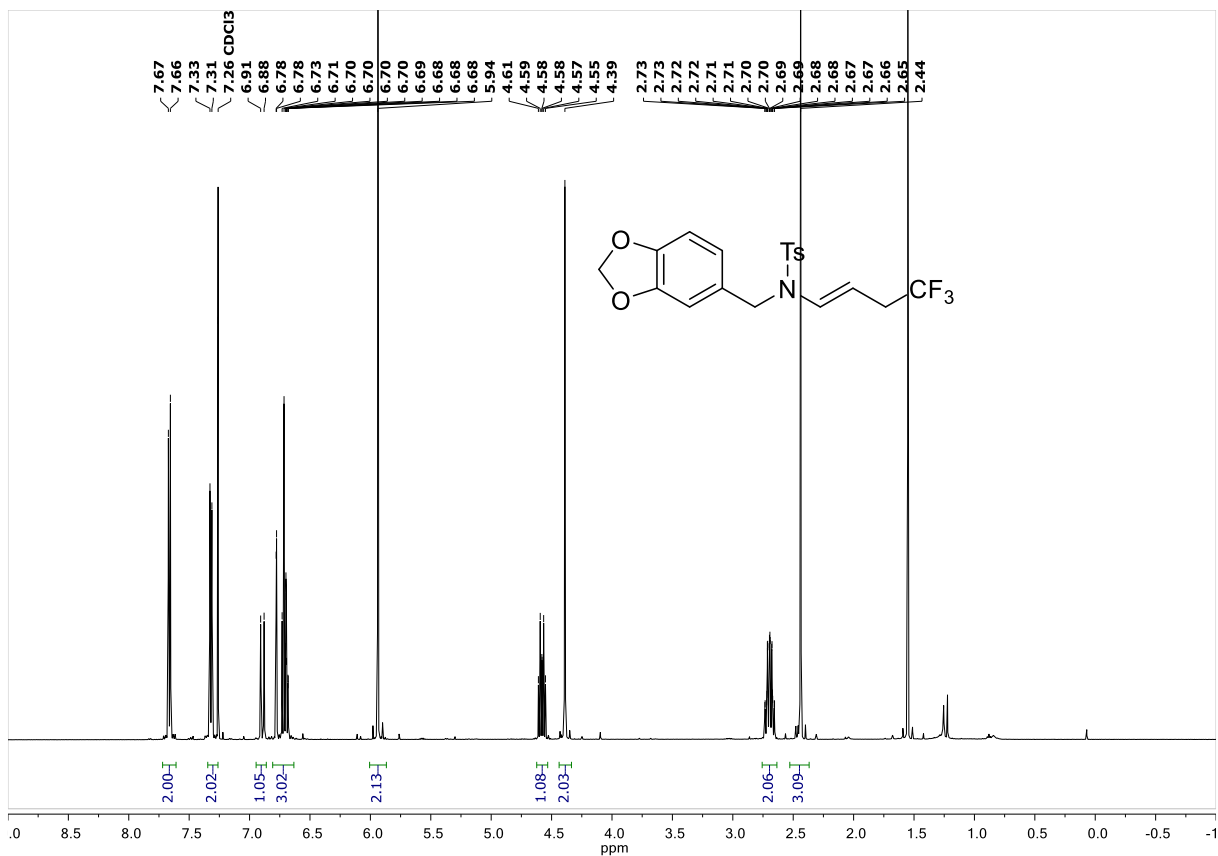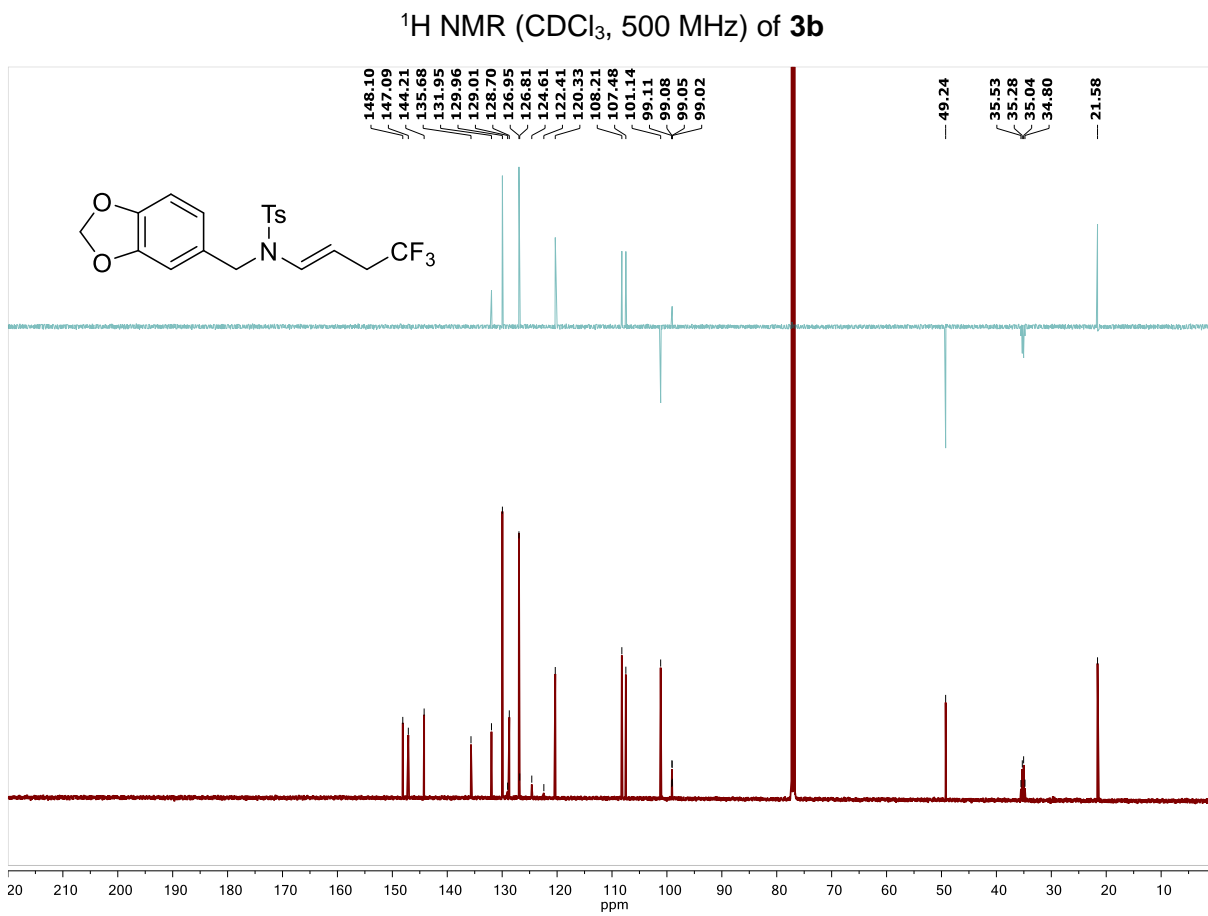

**<sup>13</sup>C{<sup>1</sup>H} NMR (CDCl<sub>3</sub>, 126 MHz) of **3b****  
S73

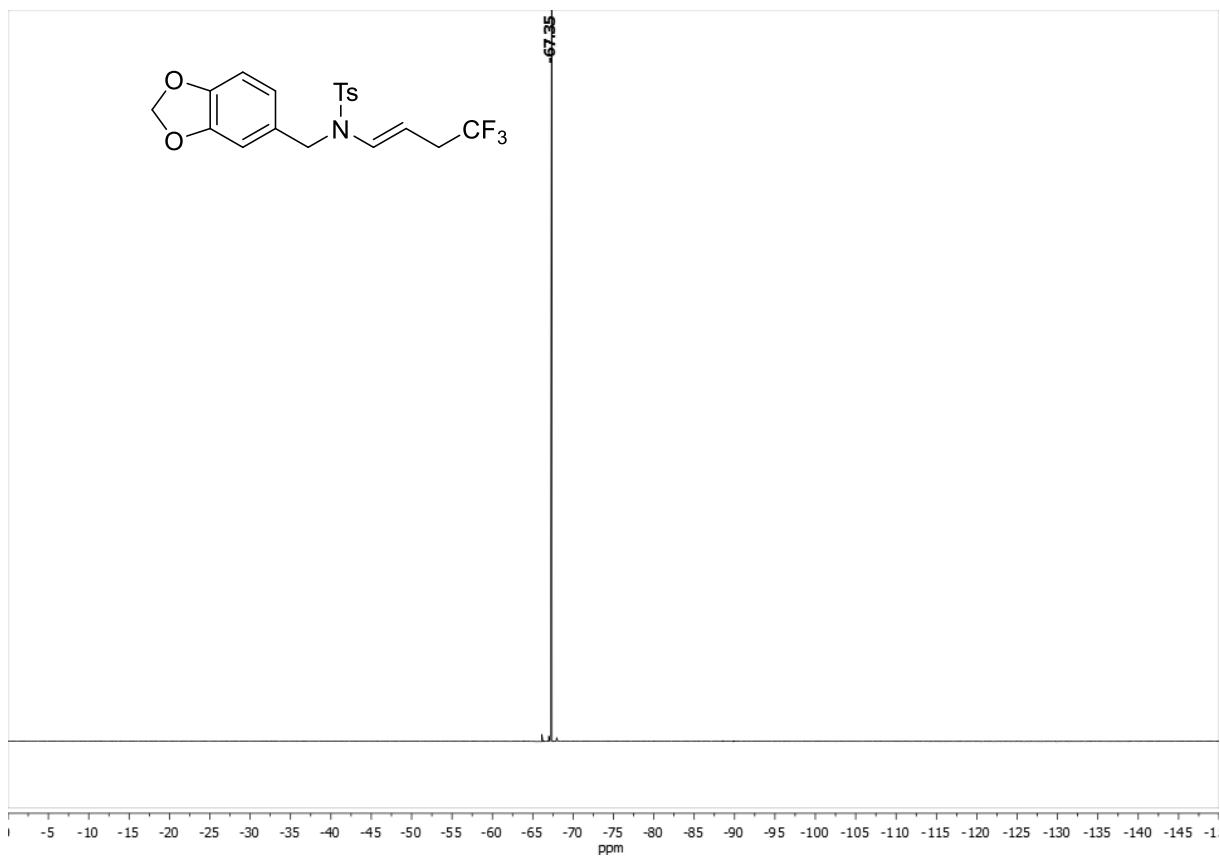

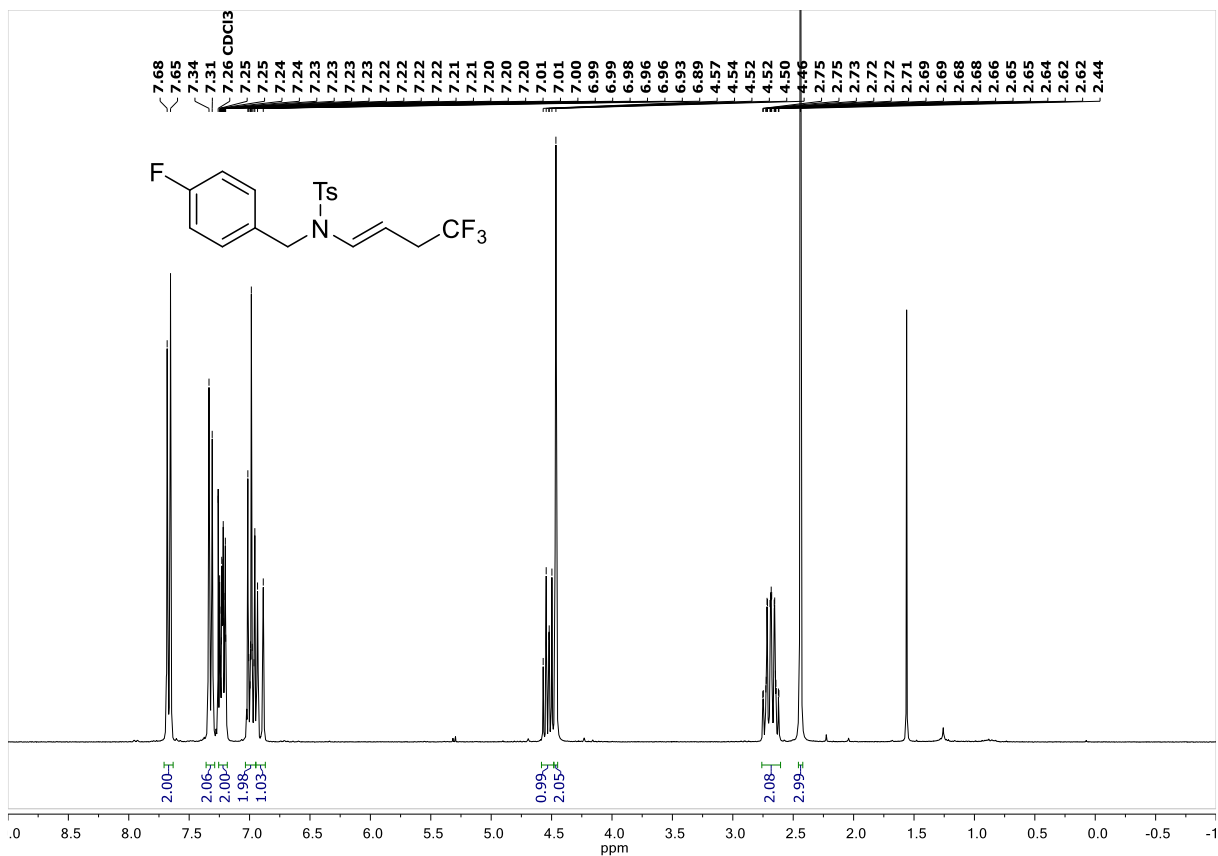

**<sup>1</sup>H NMR (CDCl<sub>3</sub>, 300 MHz) of 3c**

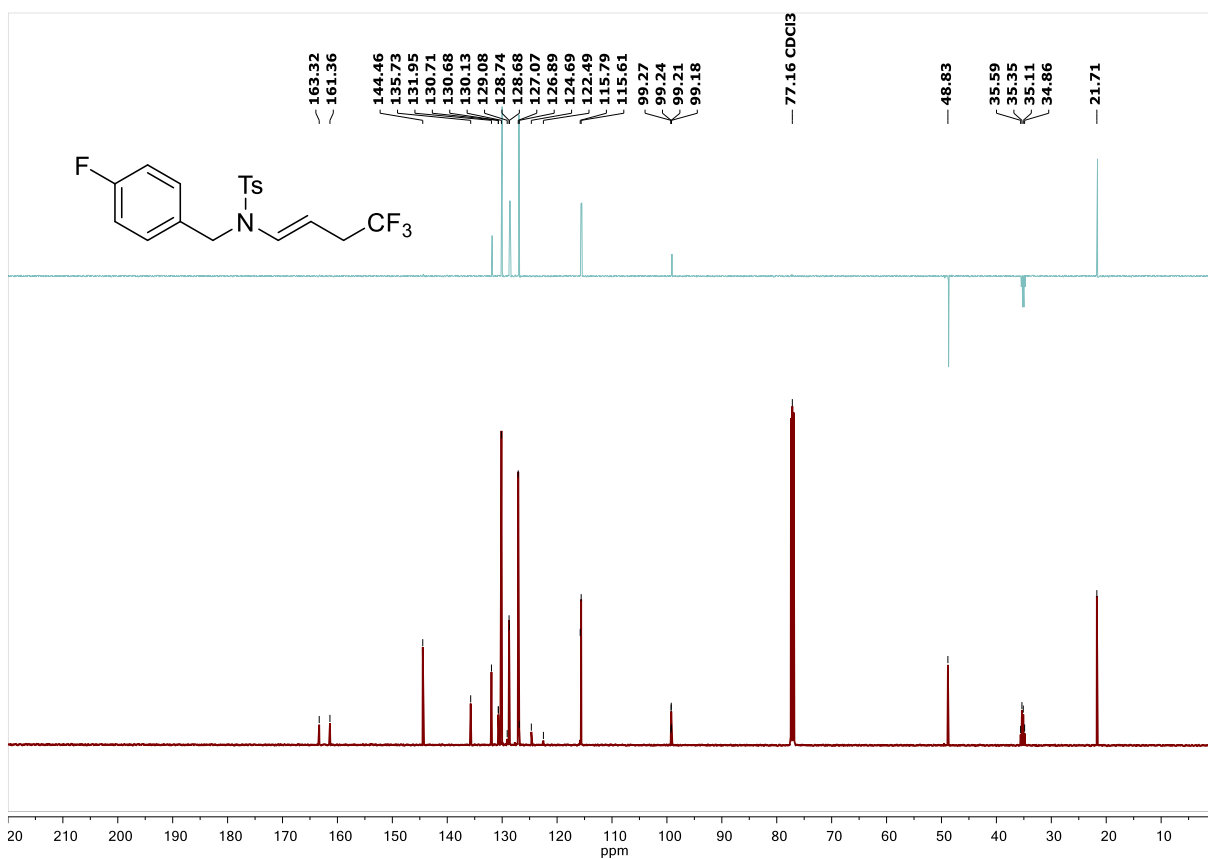

**<sup>13</sup>C{<sup>1</sup>H} NMR (CDCl<sub>3</sub>, 126 MHz) of 3c**

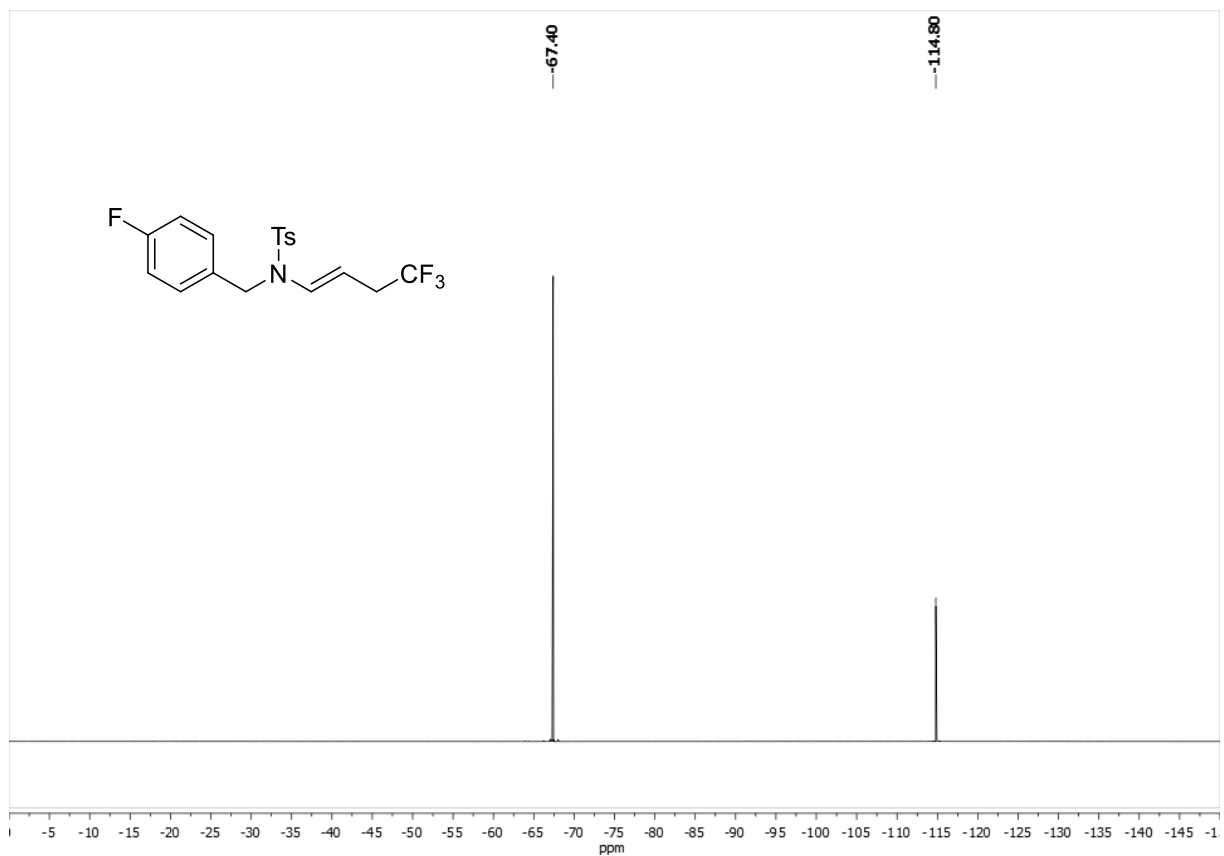

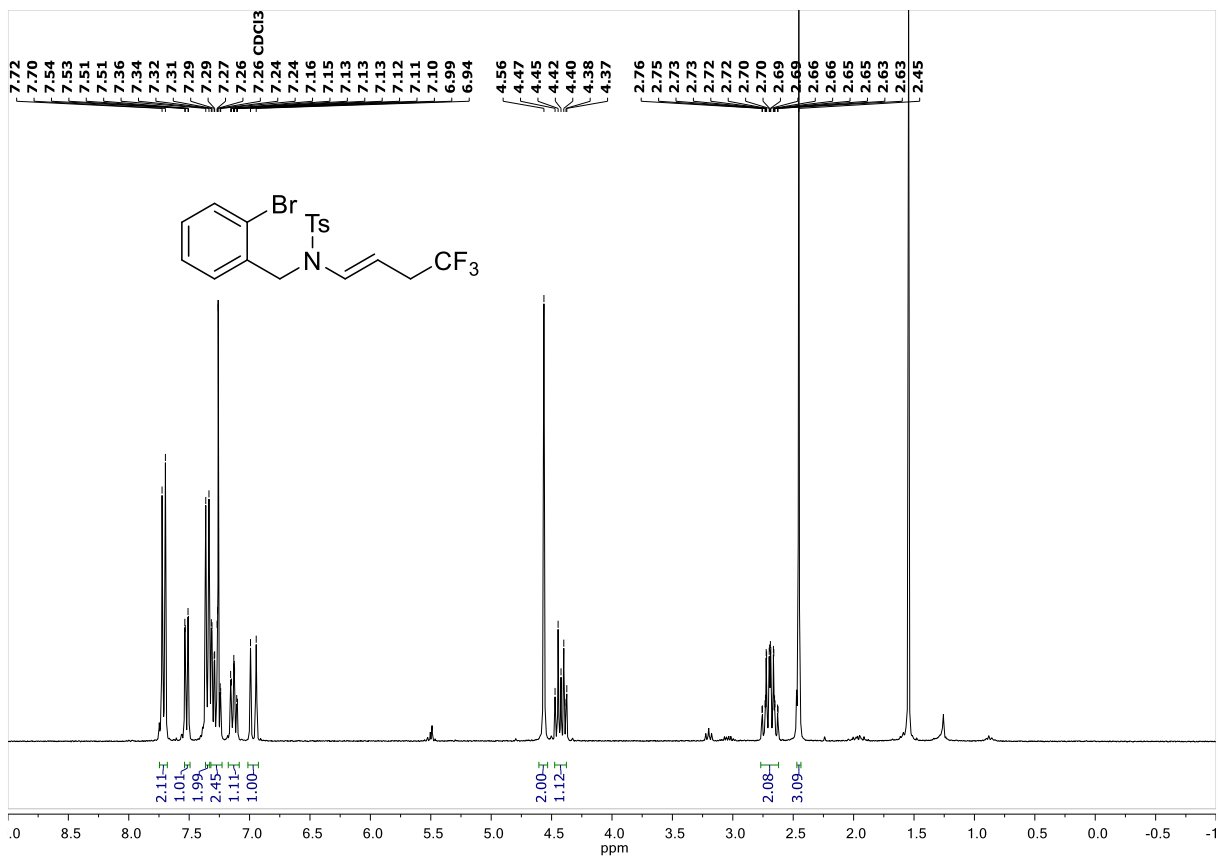

**<sup>1</sup>H NMR (CDCl<sub>3</sub>, 300 MHz) of 3d**

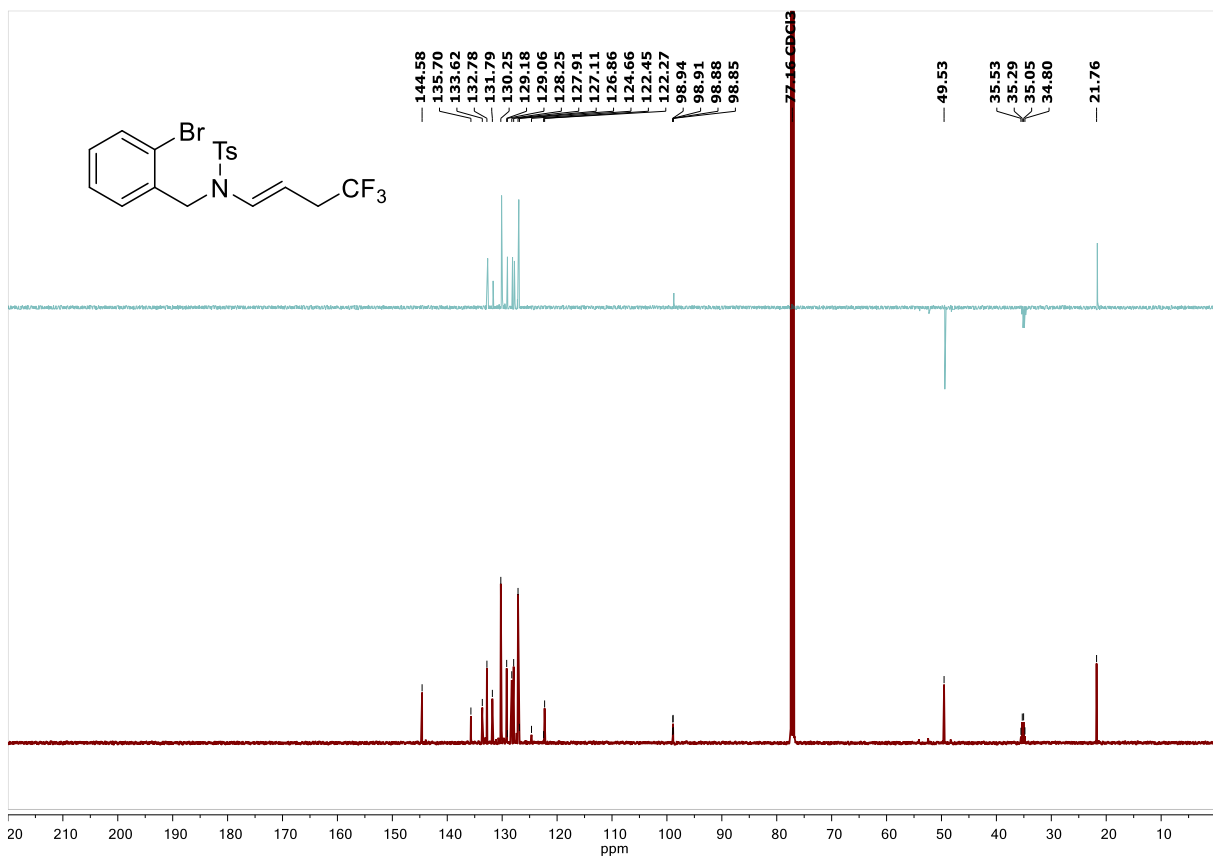

**<sup>13</sup>C{<sup>1</sup>H} NMR (CDCl<sub>3</sub>, 126 MHz) of 3d**

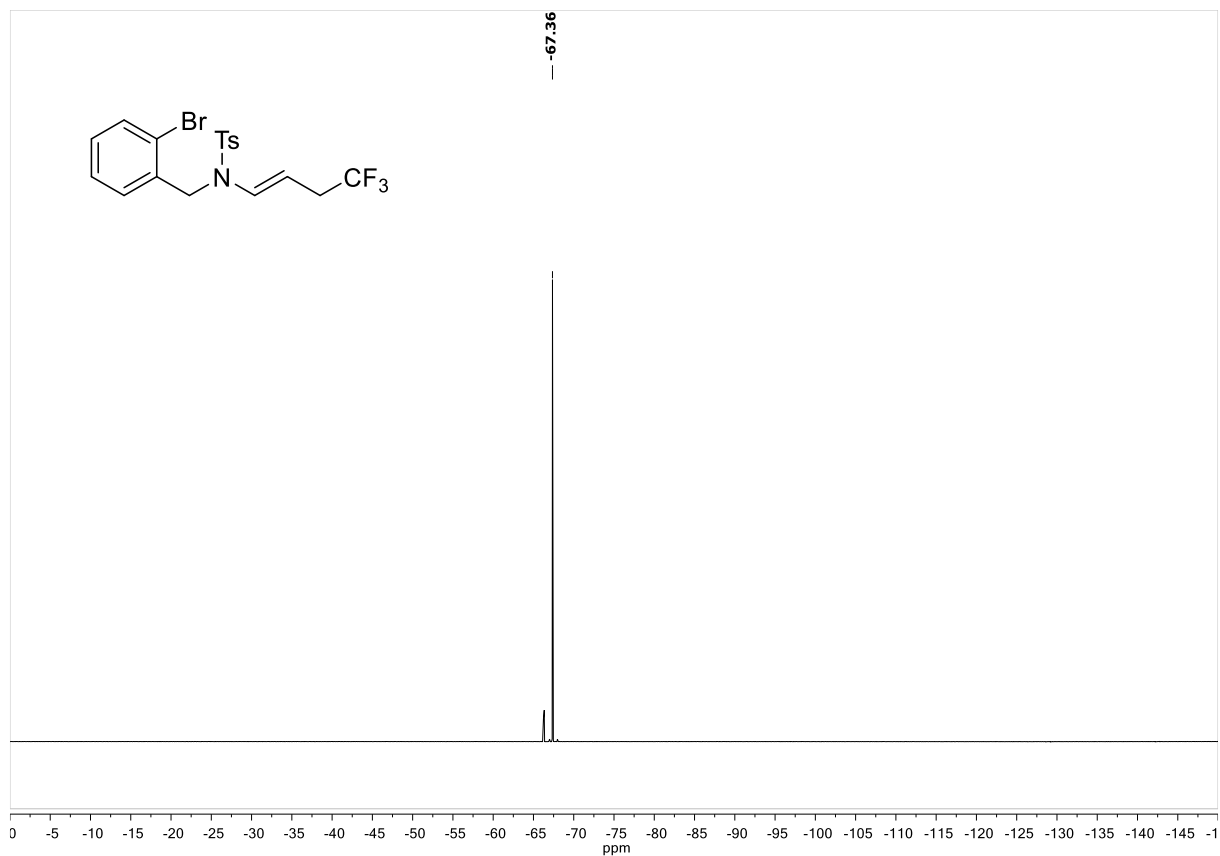

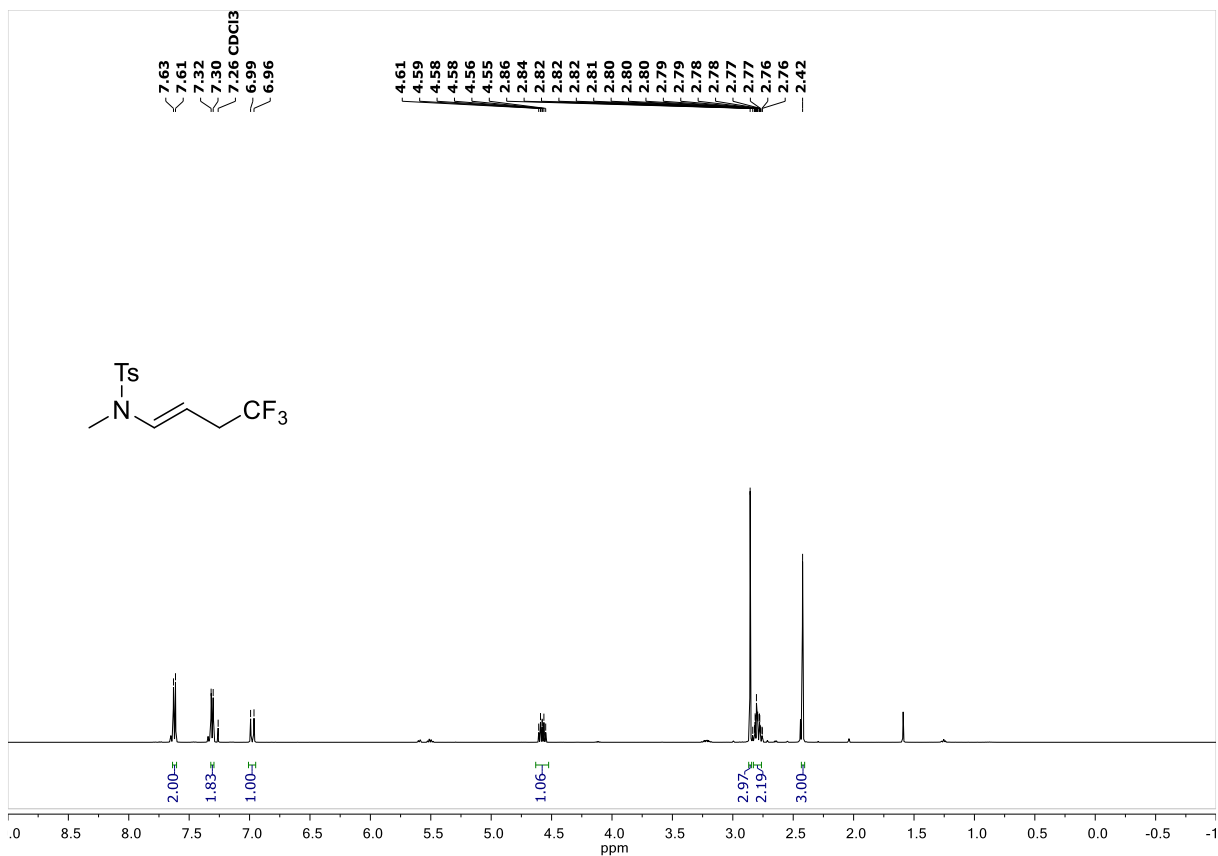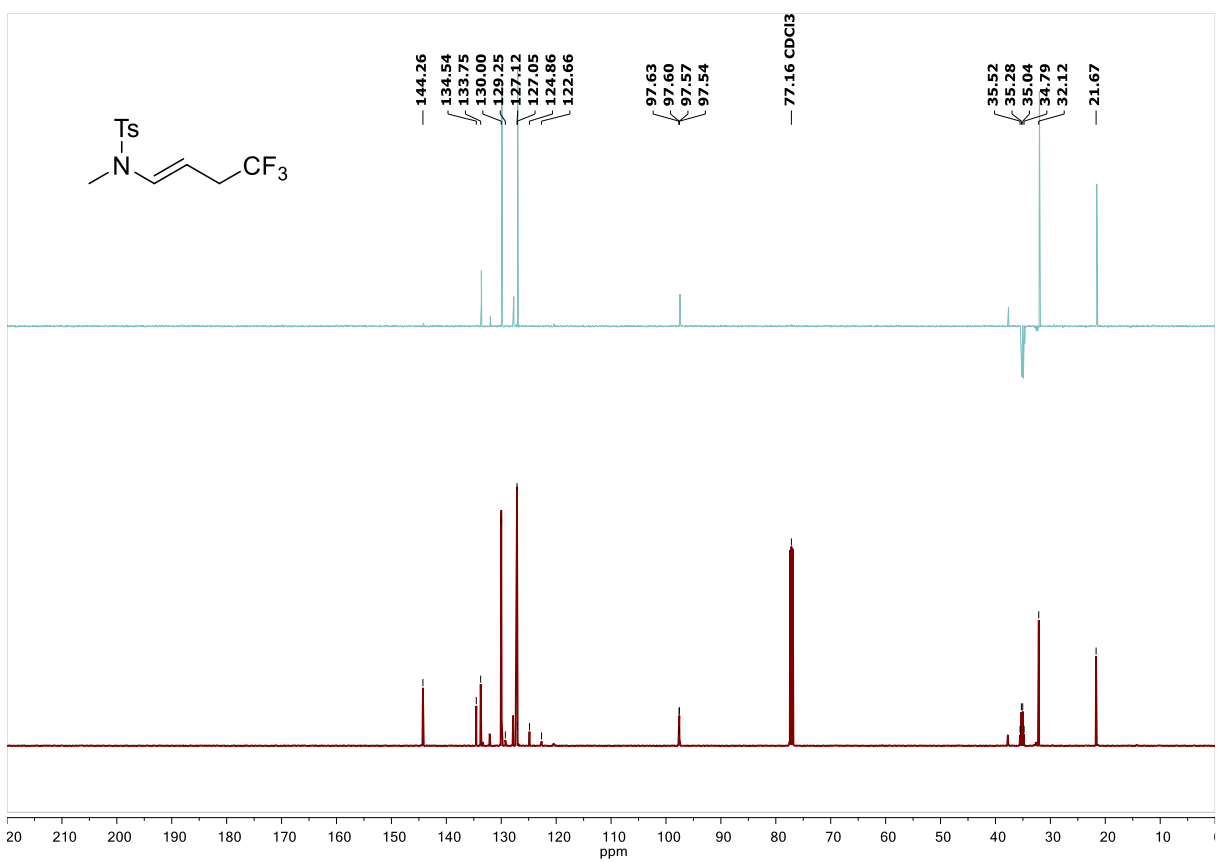

<sup>13</sup>C{<sup>1</sup>H} NMR (CDCl<sub>3</sub>, 126 MHz) of **3e**

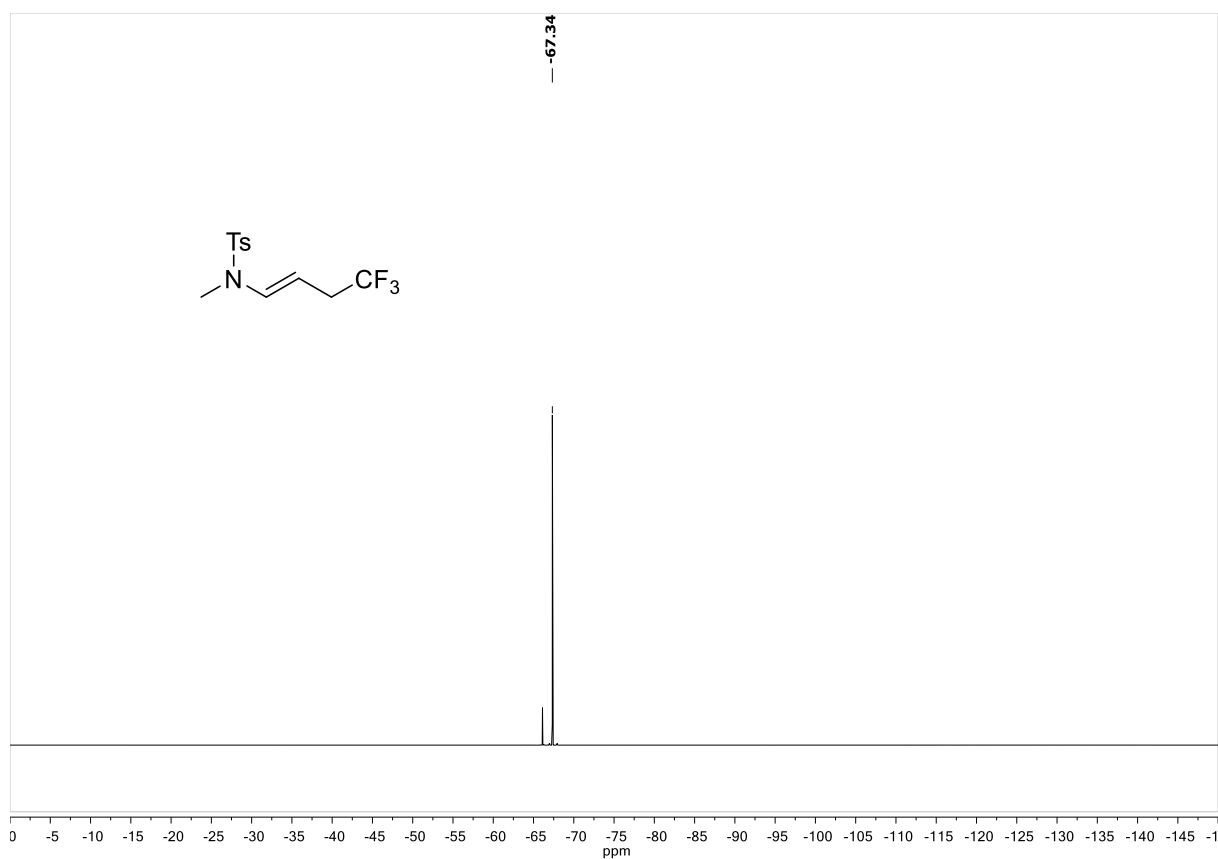

$^{19}\text{F}\{^1\text{H}\}$  NMR ( $\text{CDCl}_3$ , 282 MHz) of **3e**



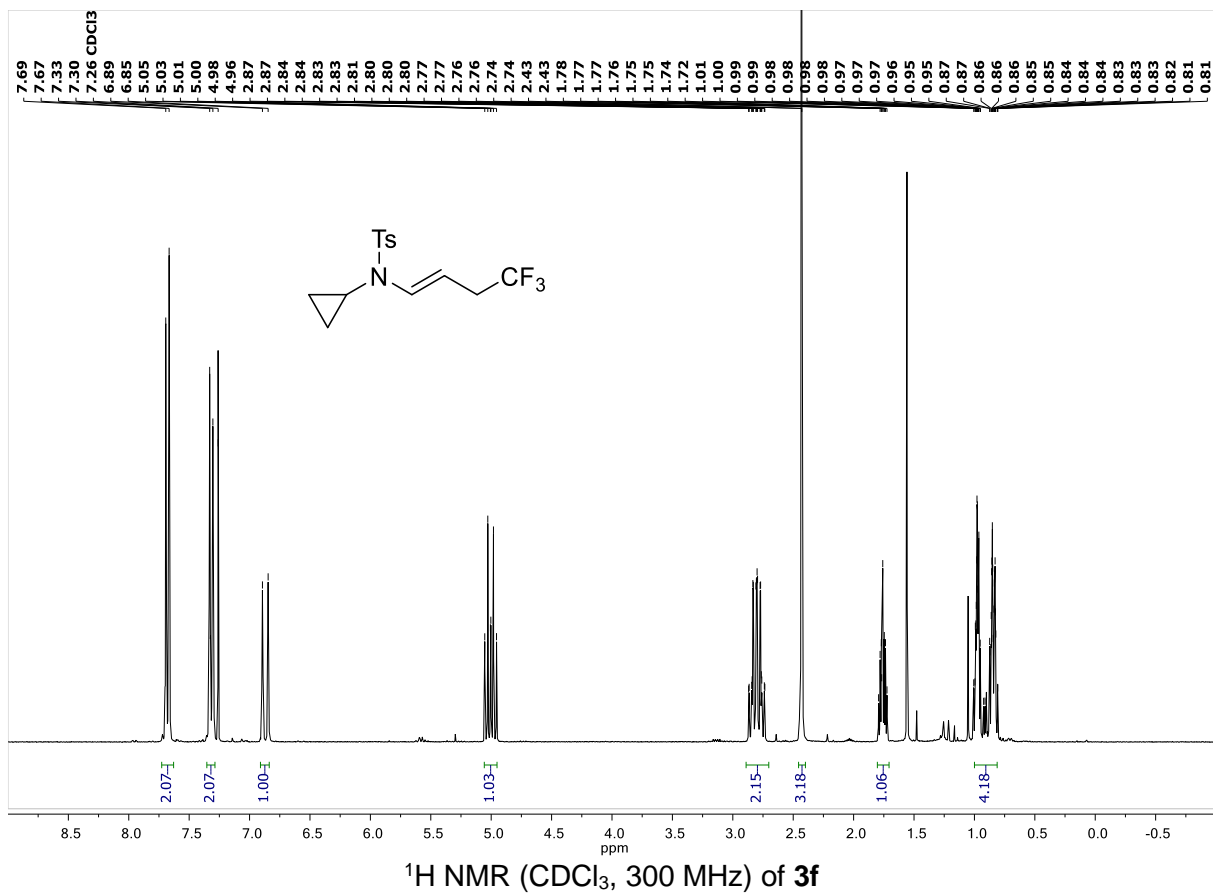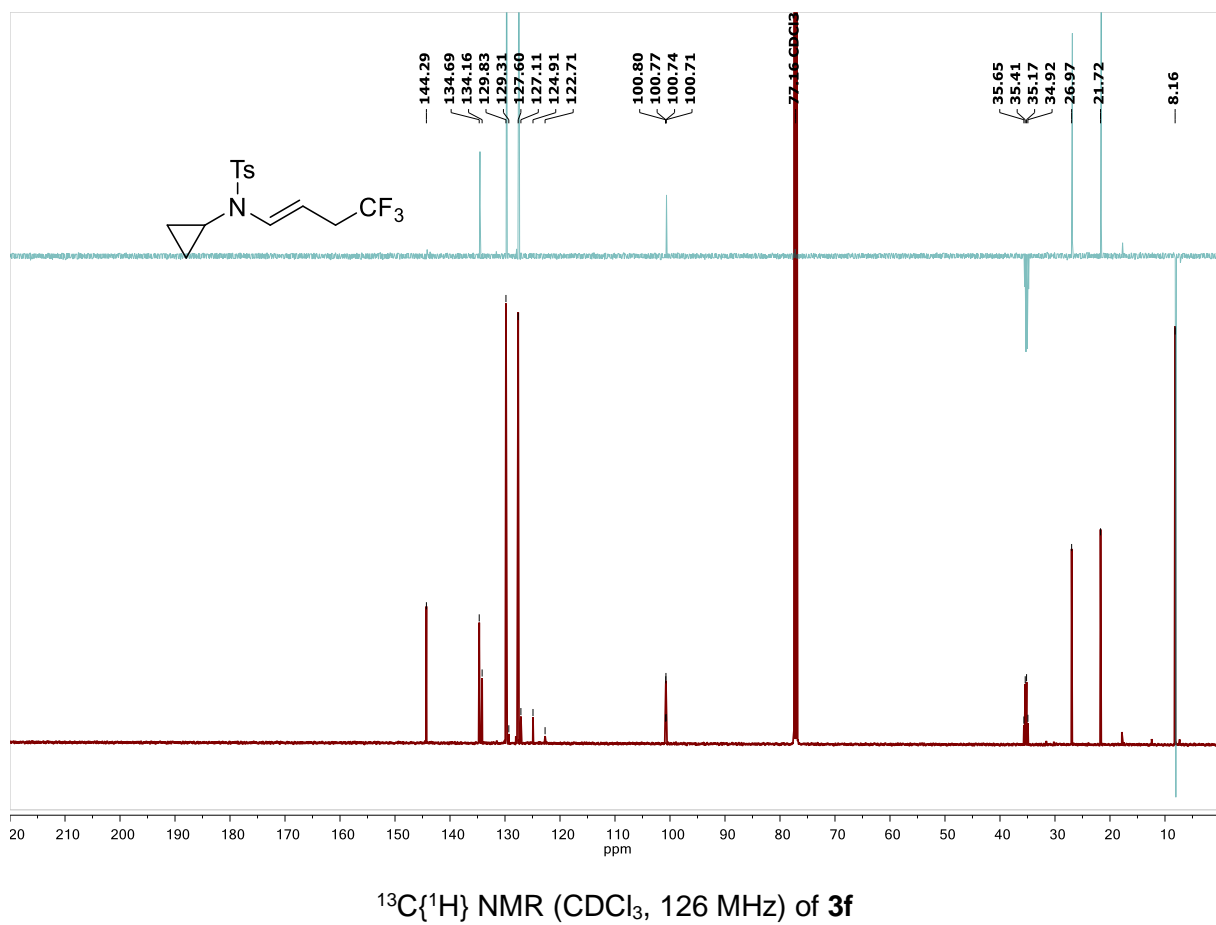

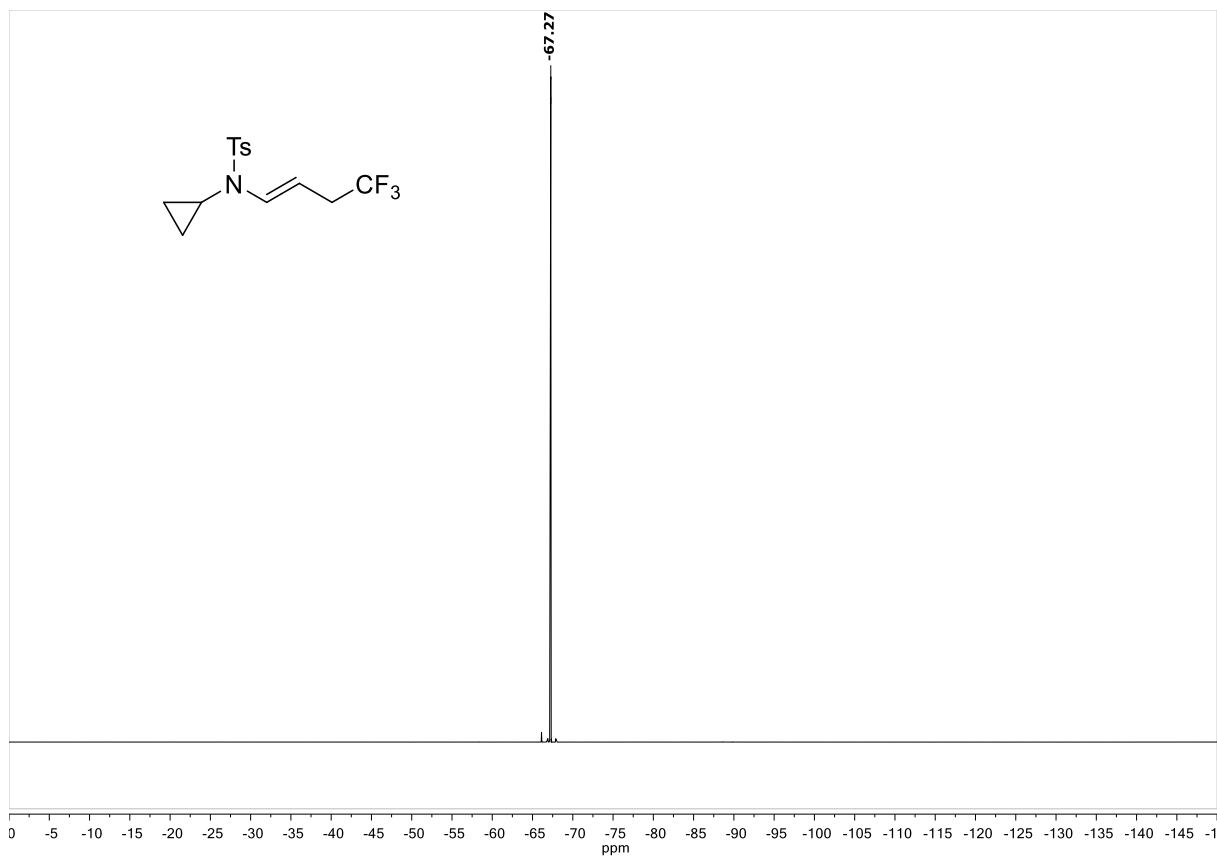

$^{19}\text{F}\{^1\text{H}\}$  NMR ( $\text{CDCl}_3$ , 282 MHz) of **3f**

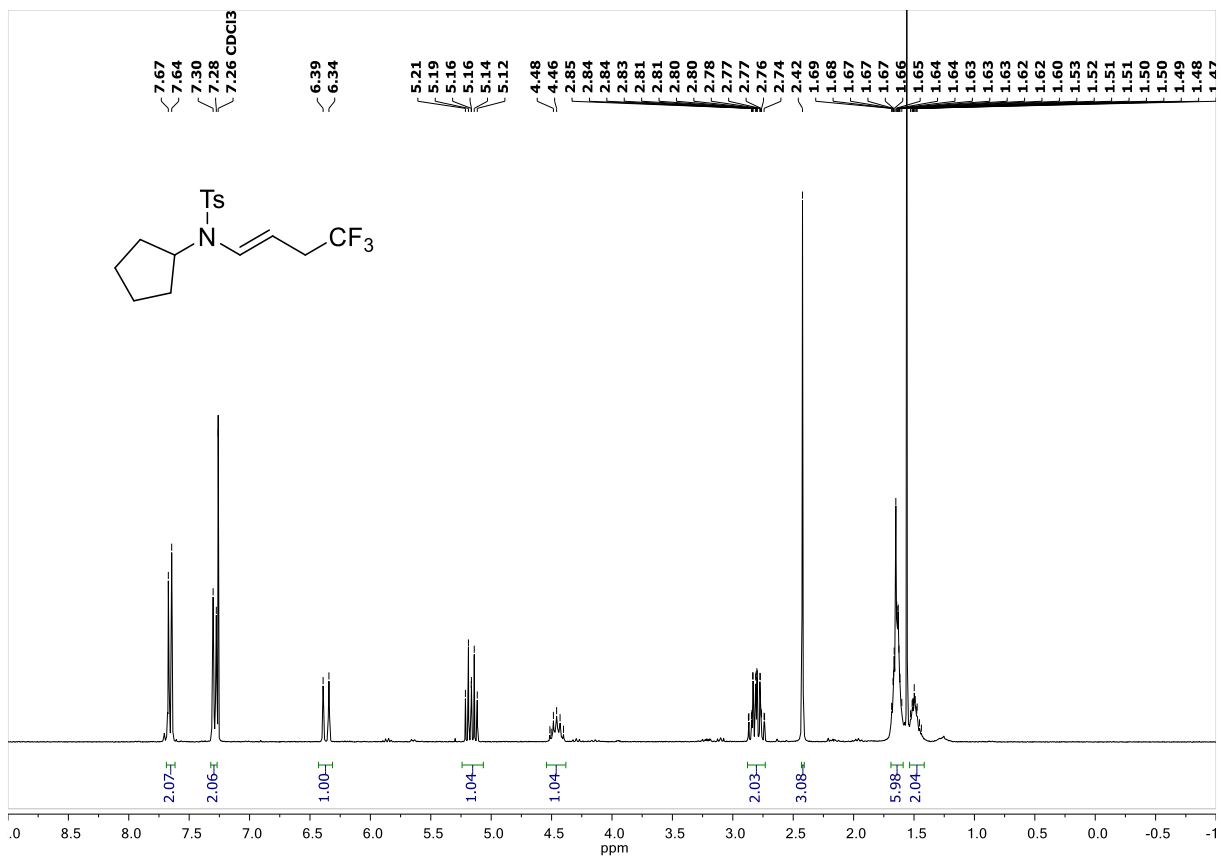

<sup>1</sup>H NMR (CDCl<sub>3</sub>, 300 MHz) of **3g**

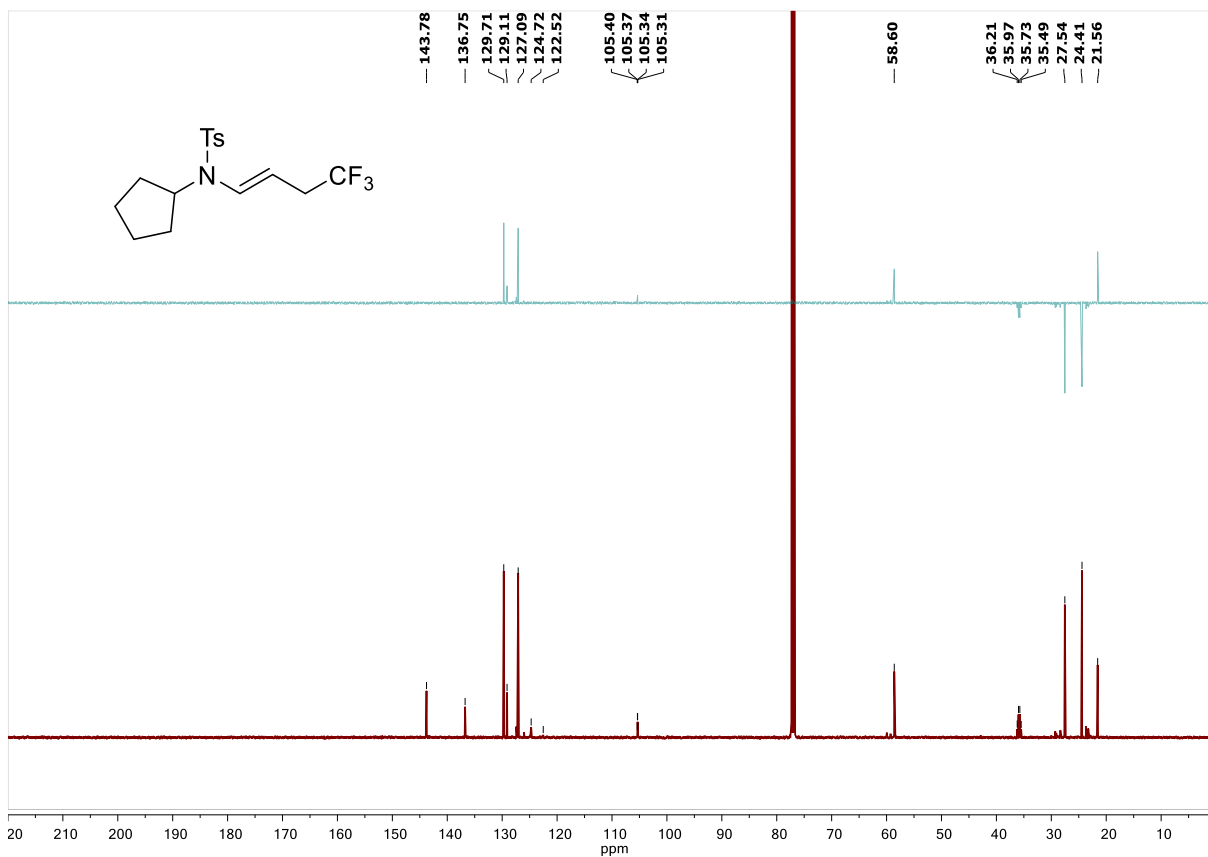

<sup>13</sup>C{<sup>1</sup>H} NMR (CDCl<sub>3</sub>, 126 MHz) of **3g**

S83

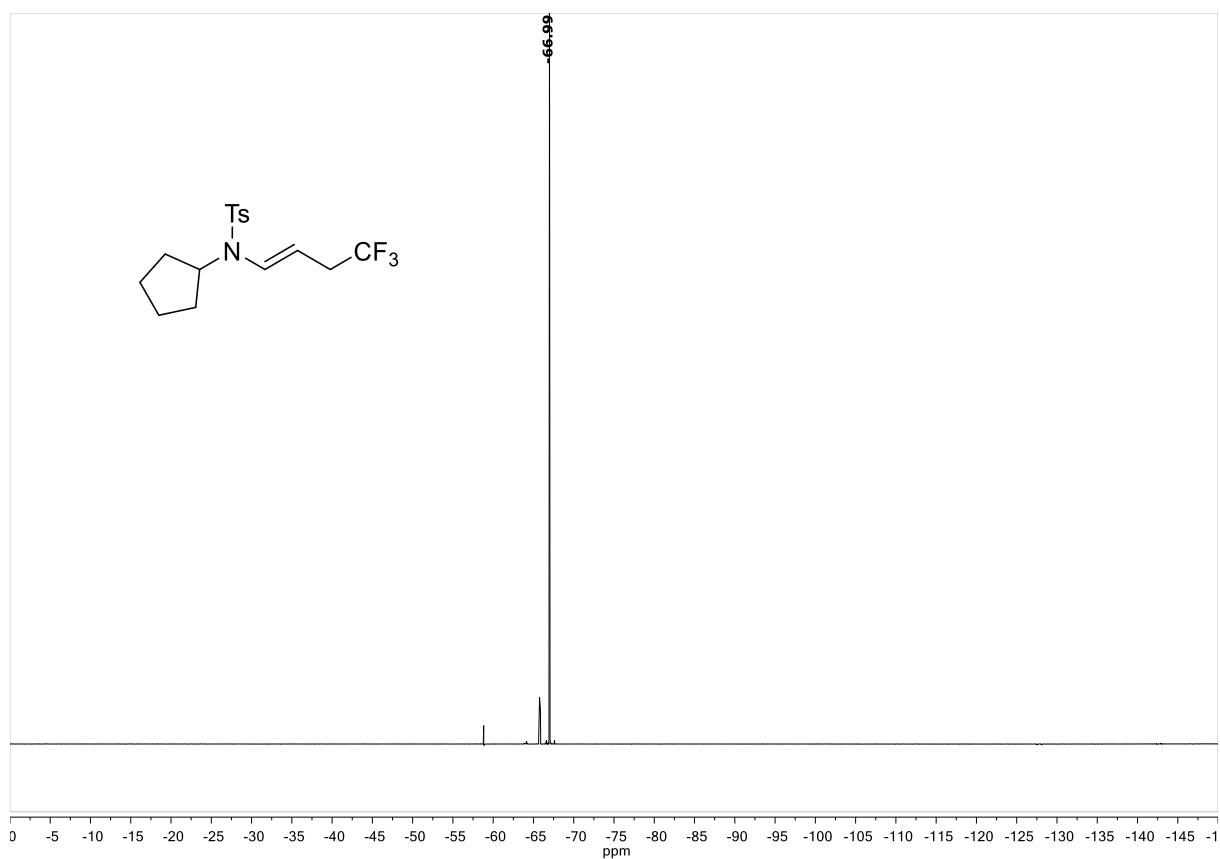

$^{19}\text{F}\{^1\text{H}\}$  NMR ( $\text{CDCl}_3$ , 282 MHz) of **3g**

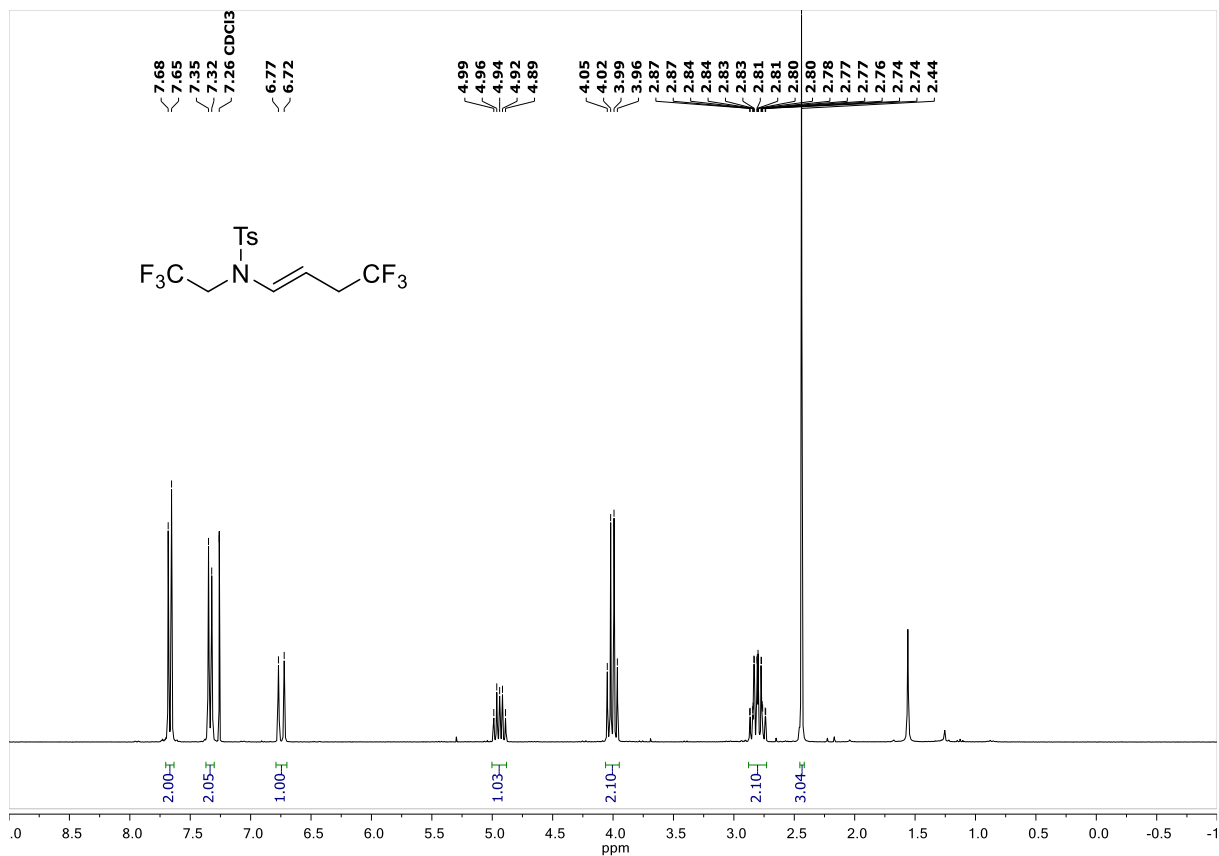

<sup>1</sup>H NMR (CDCl<sub>3</sub>, 300 MHz) of **3h**

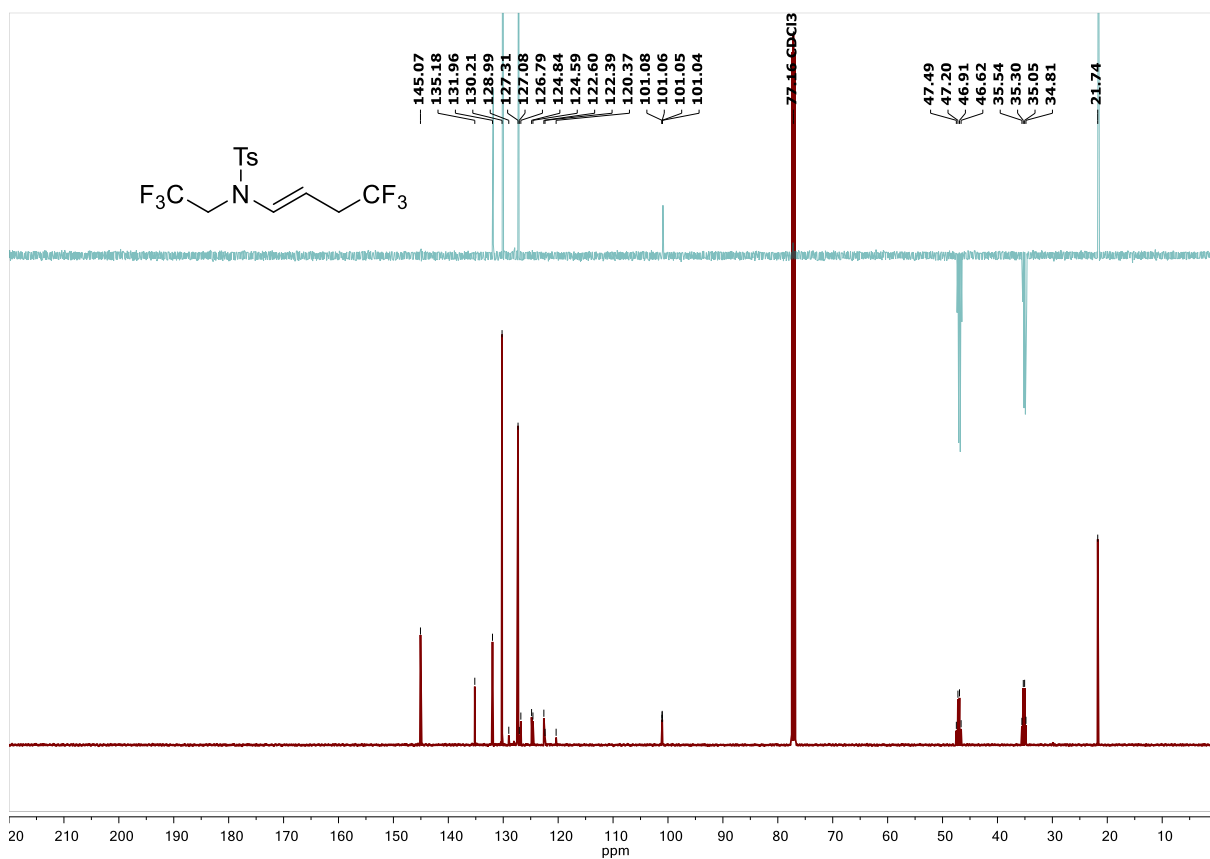

<sup>13</sup>C{<sup>1</sup>H} NMR (CDCl<sub>3</sub>, 126 MHz) of **3h**

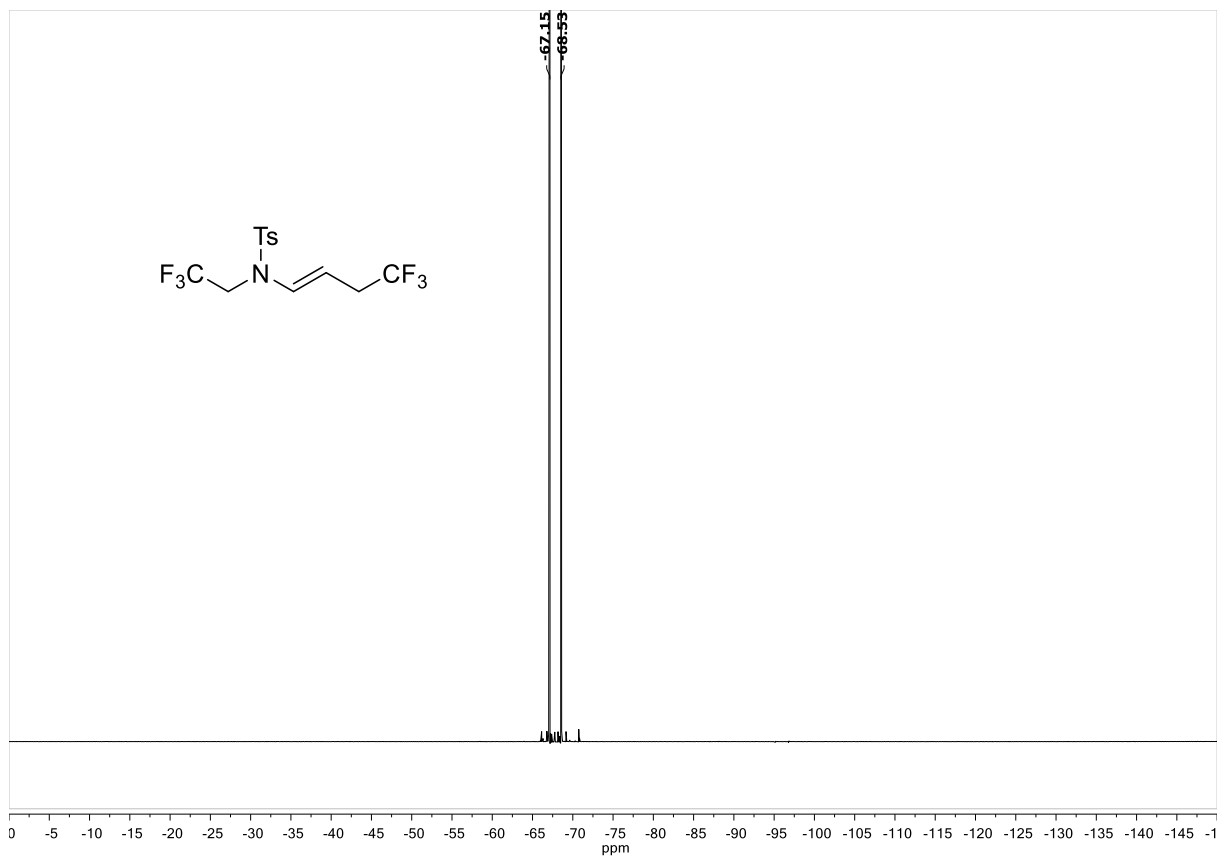

$^{19}\text{F}\{^1\text{H}\}$  NMR ( $\text{CDCl}_3$ , 282 MHz) of **3h**

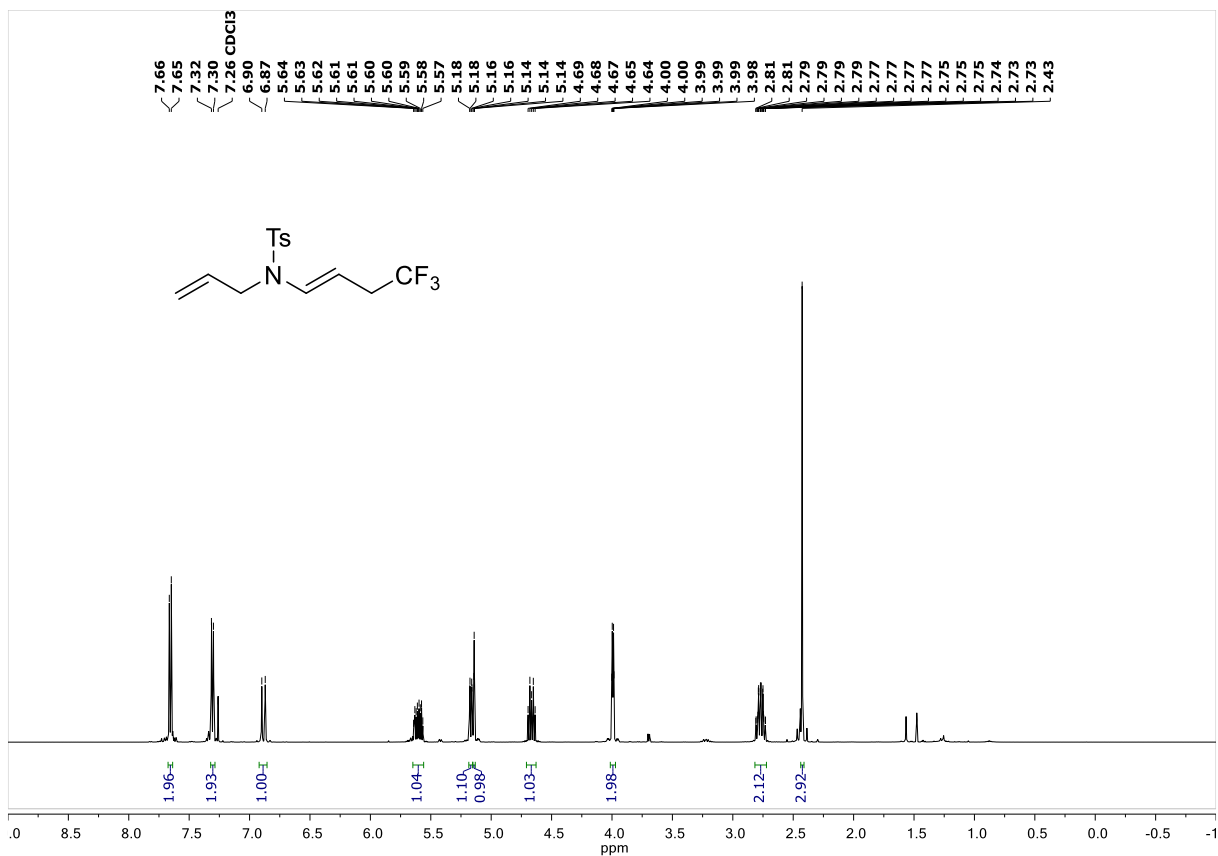

<sup>1</sup>H NMR (CDCl<sub>3</sub>, 500 MHz) of **3i**

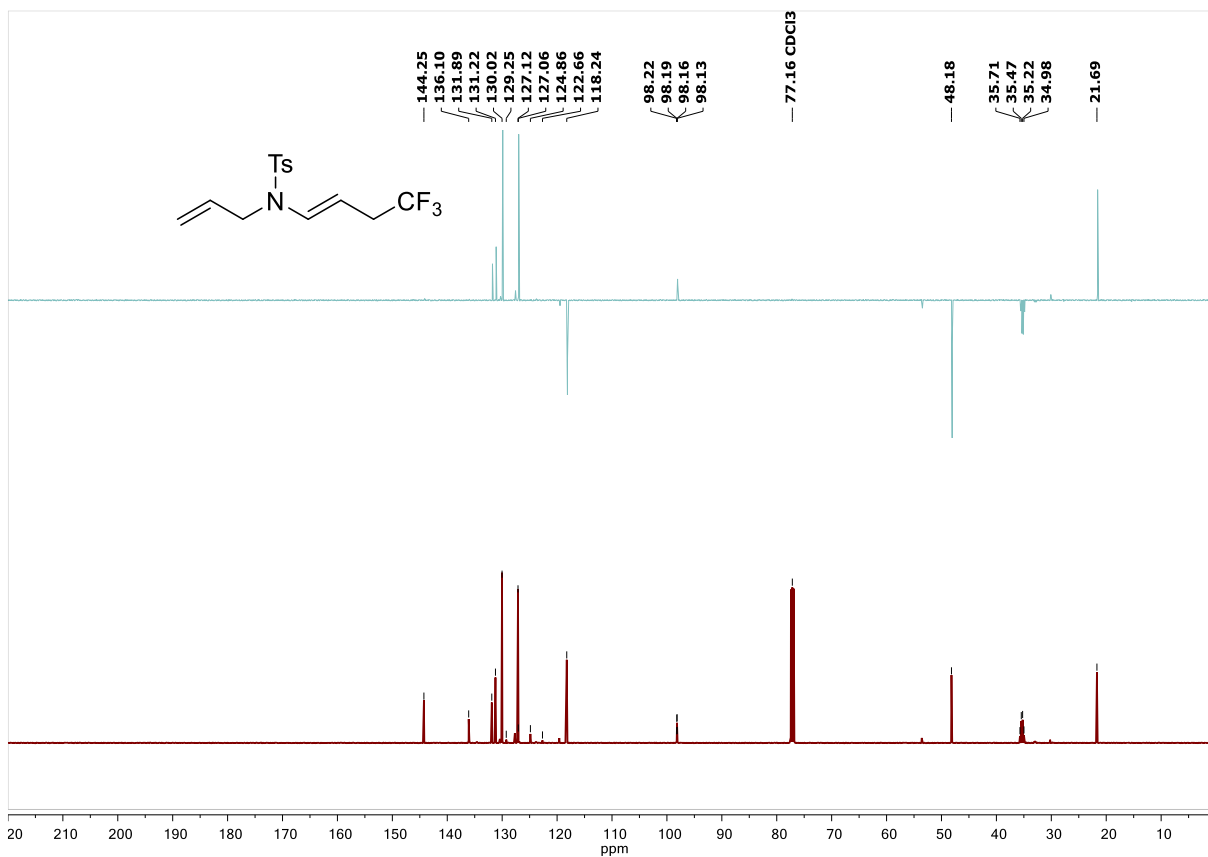

<sup>13</sup>C{<sup>1</sup>H} NMR (CDCl<sub>3</sub>, 126 MHz) of **3i**

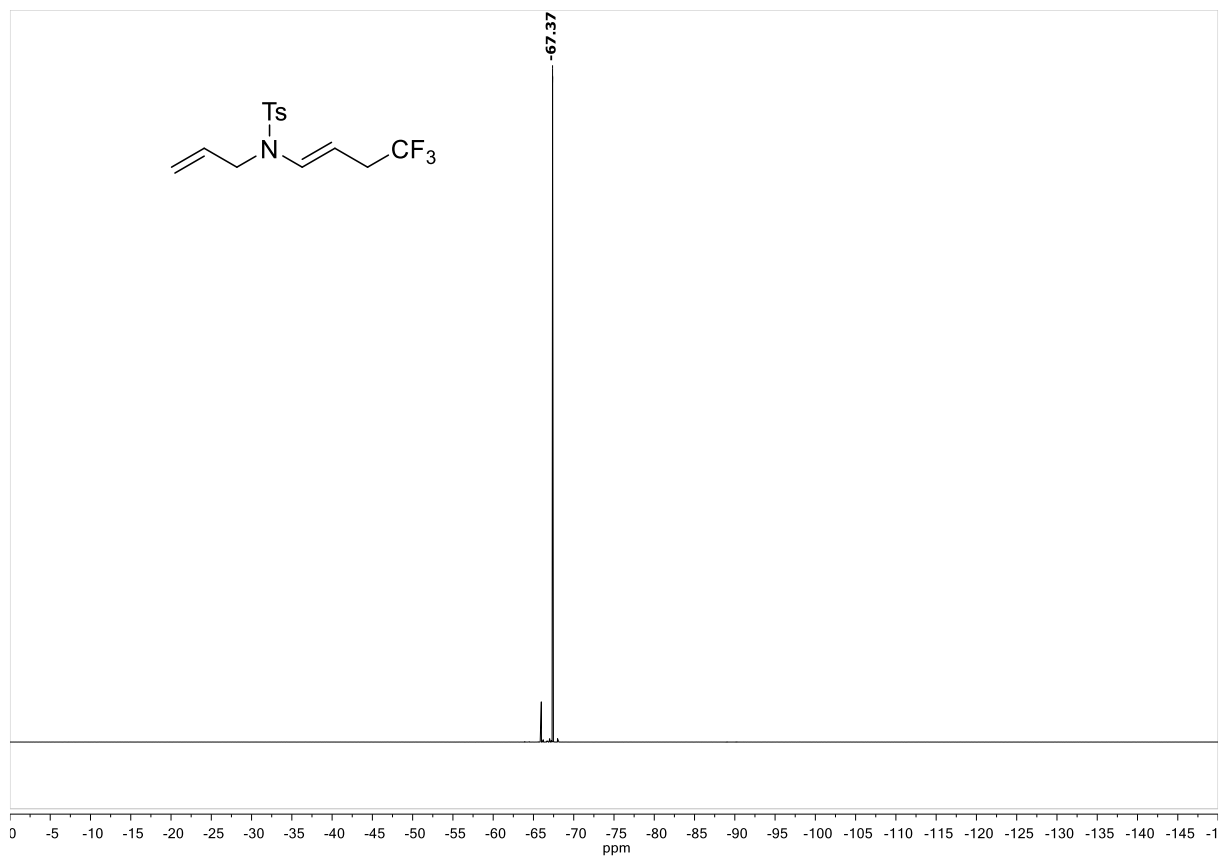

$^{19}\text{F}\{^1\text{H}\}$  NMR ( $\text{CDCl}_3$ , 282 MHz) of **3i**



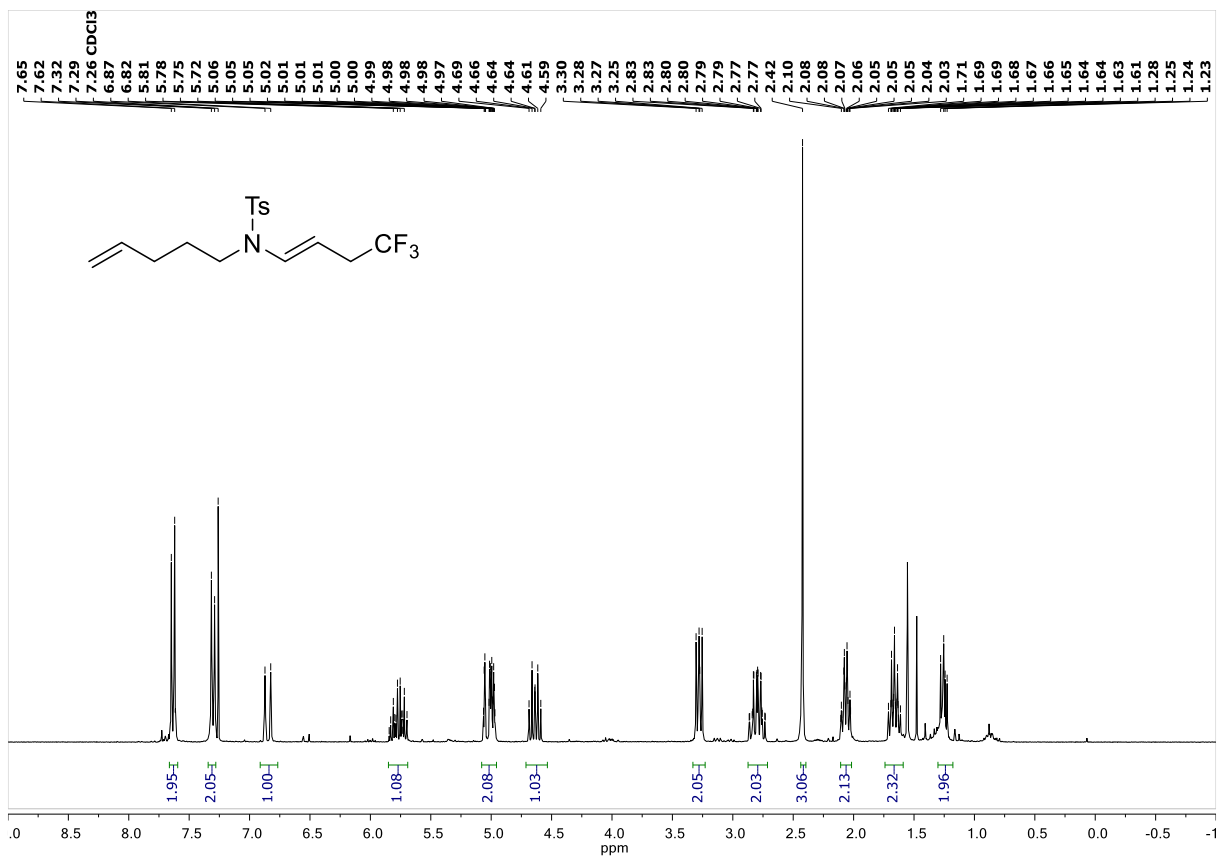

**<sup>1</sup>H NMR (CDCl<sub>3</sub>, 300 MHz) of **3j****

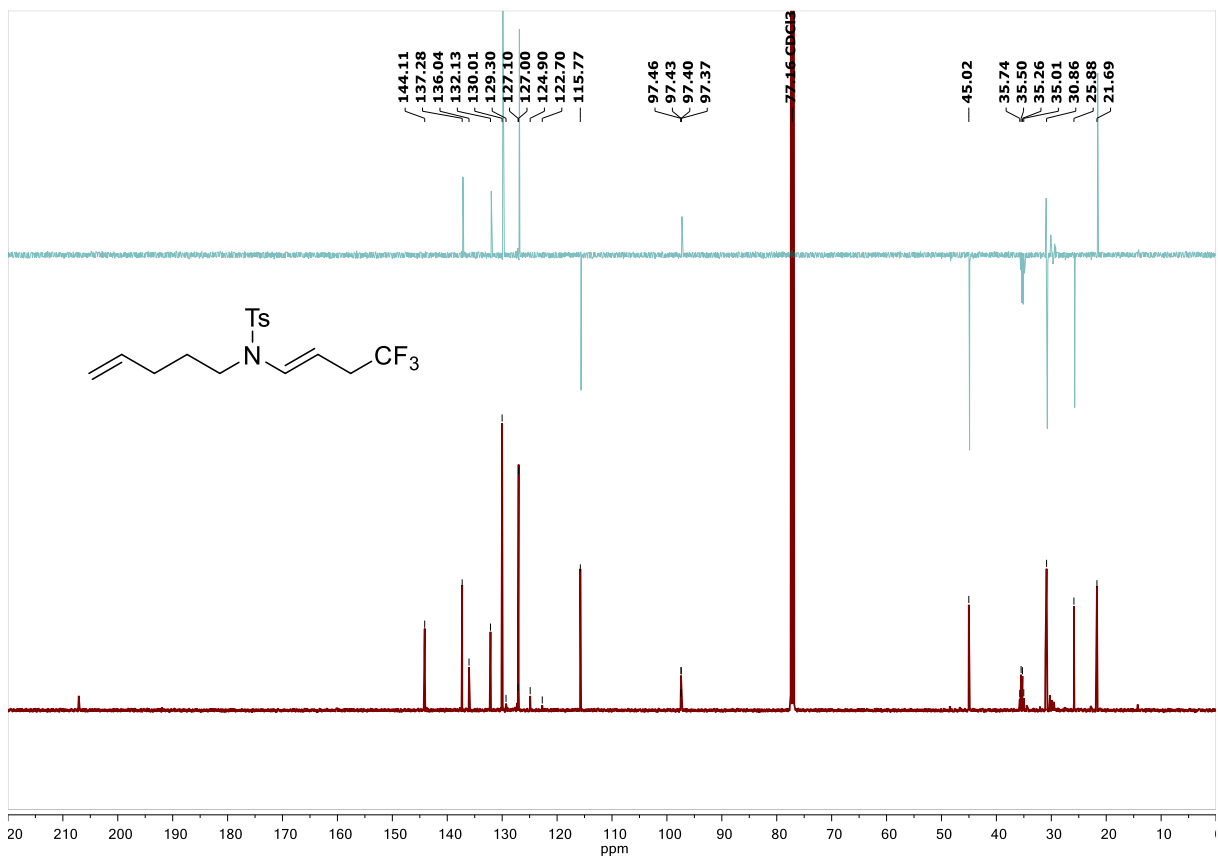

**<sup>13</sup>C{<sup>1</sup>H} NMR (CDCl<sub>3</sub>, 126 MHz) of **3j****

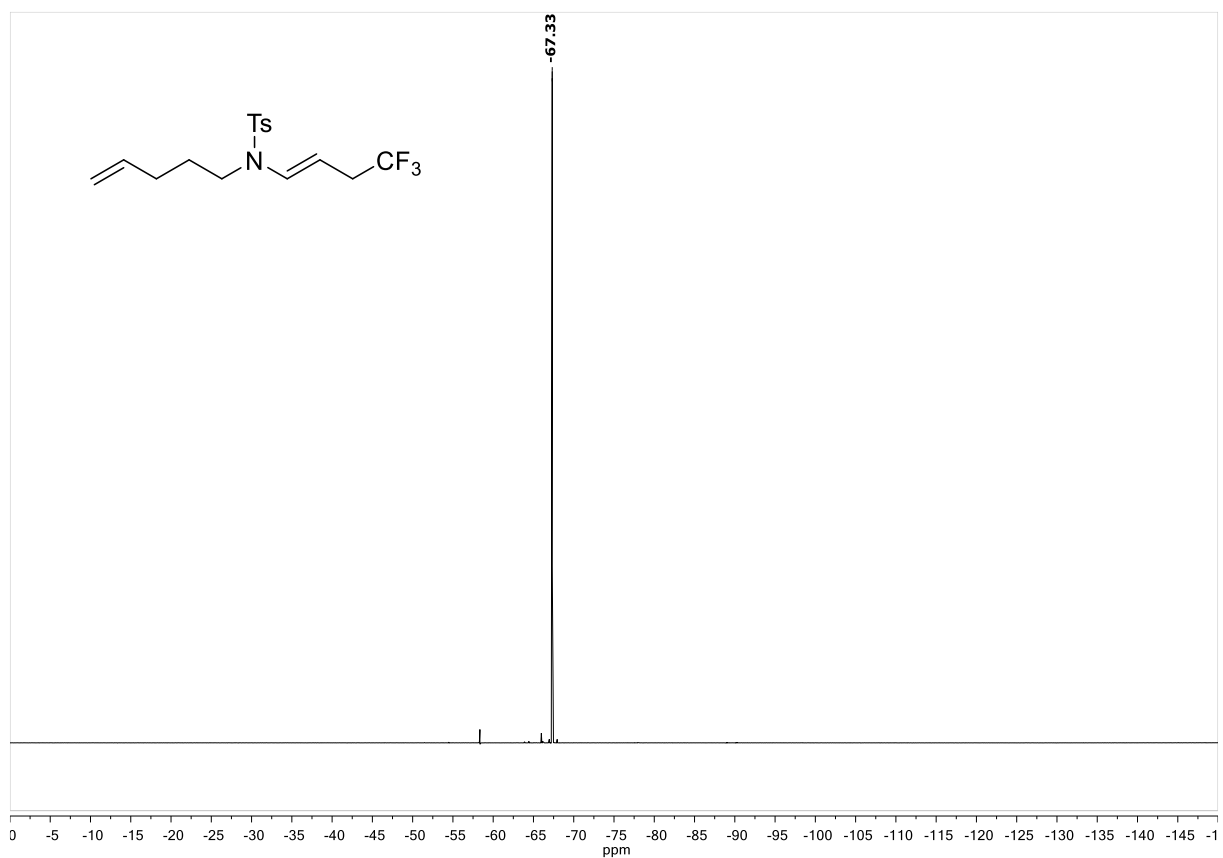

$^{19}\text{F}\{^1\text{H}\}$  NMR ( $\text{CDCl}_3$ , 282 MHz) of **3j**

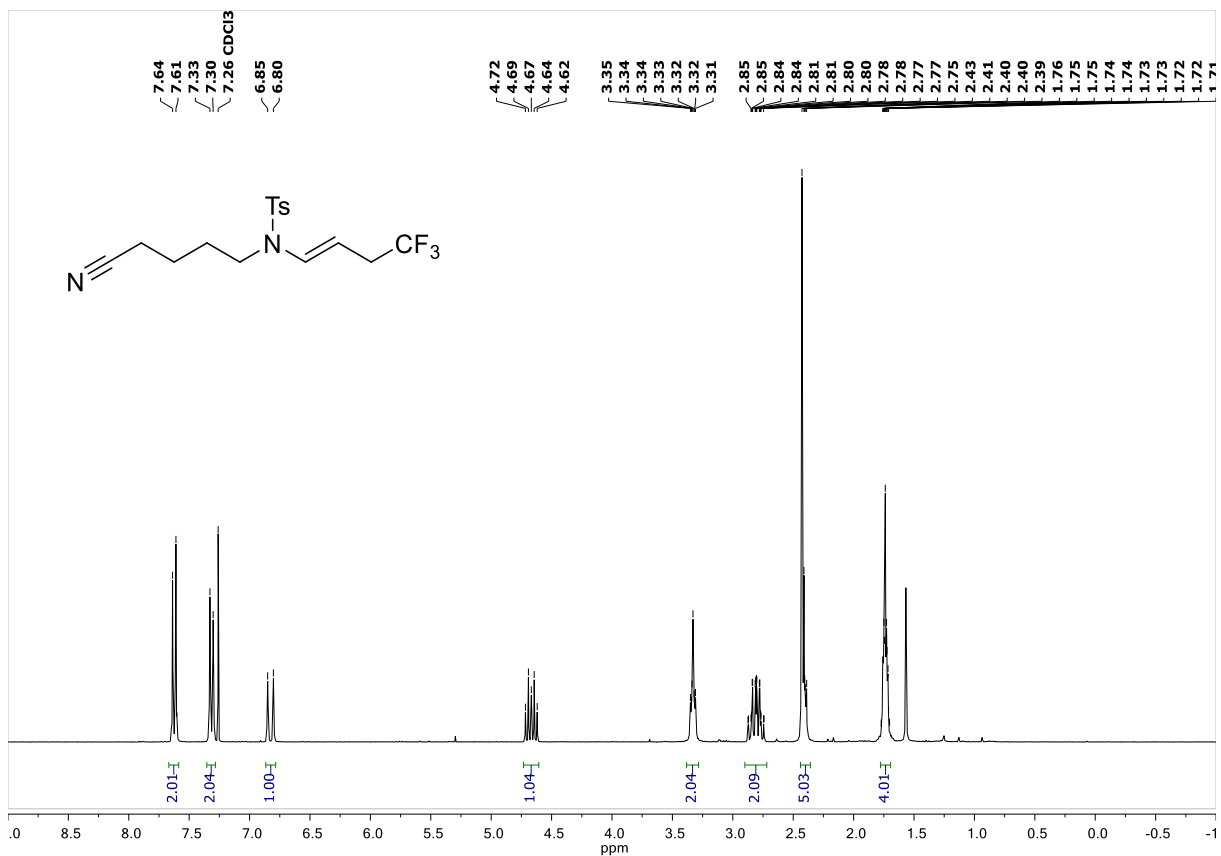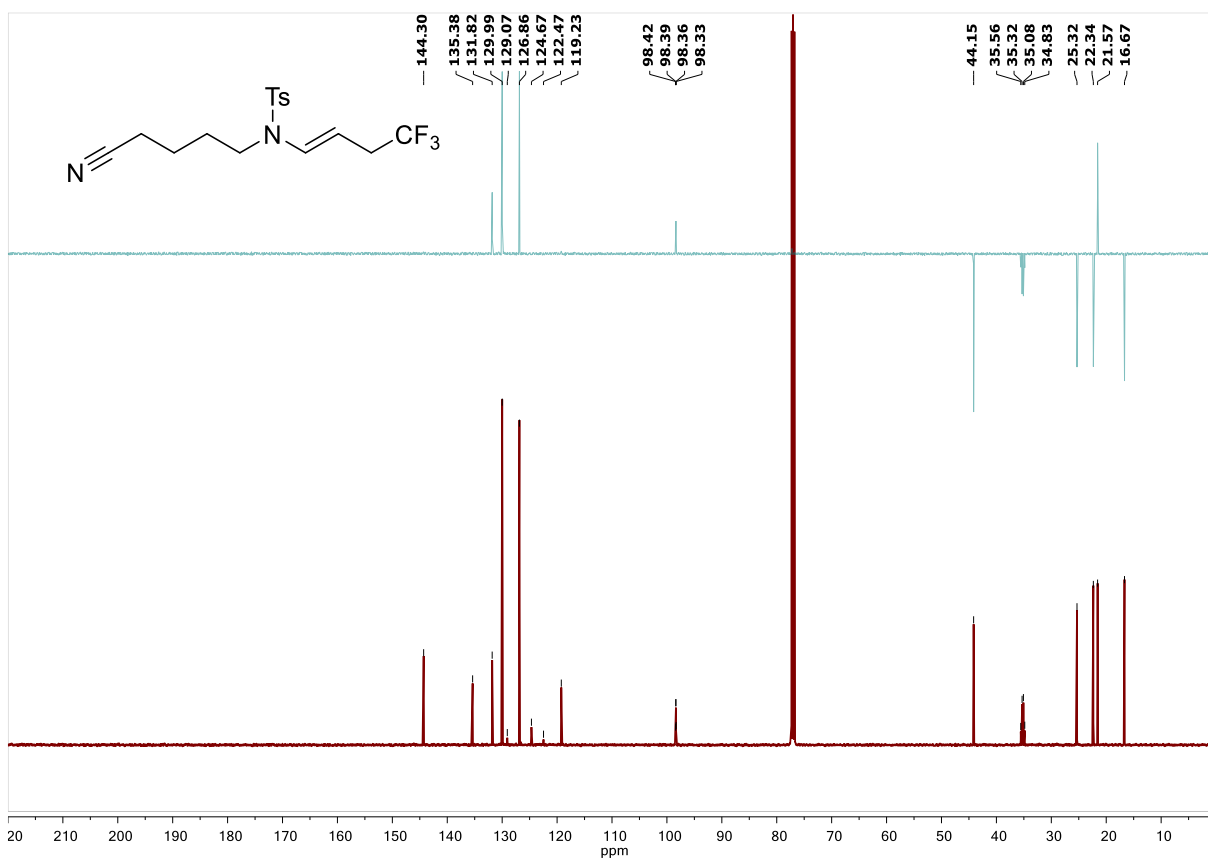

**<sup>13</sup>C{<sup>1</sup>H} NMR (CDCl<sub>3</sub>, 126 MHz) of 3k**  
S91

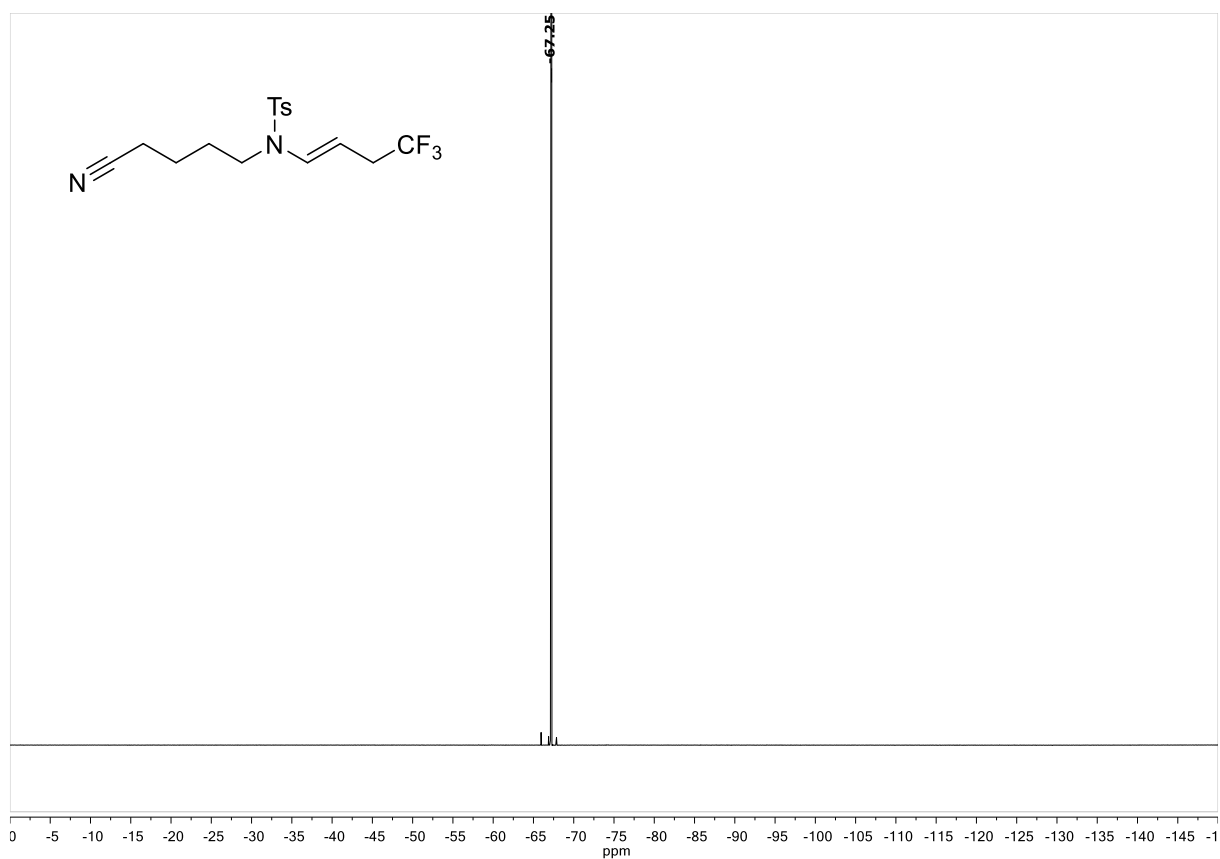

$^{19}\text{F}\{^1\text{H}\}$  NMR ( $\text{CDCl}_3$ , 282 MHz) of **3k**

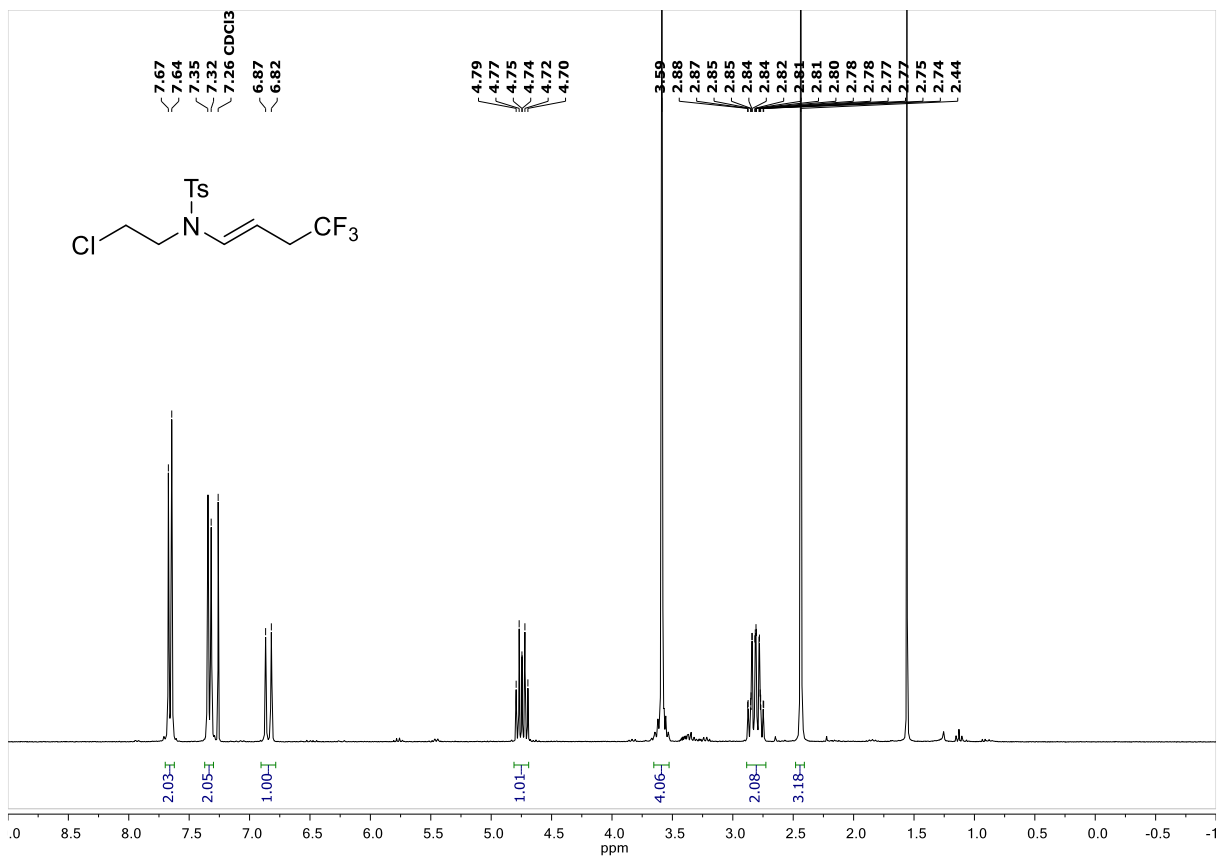

<sup>1</sup>H NMR (CDCl<sub>3</sub>, 300 MHz) of **31**

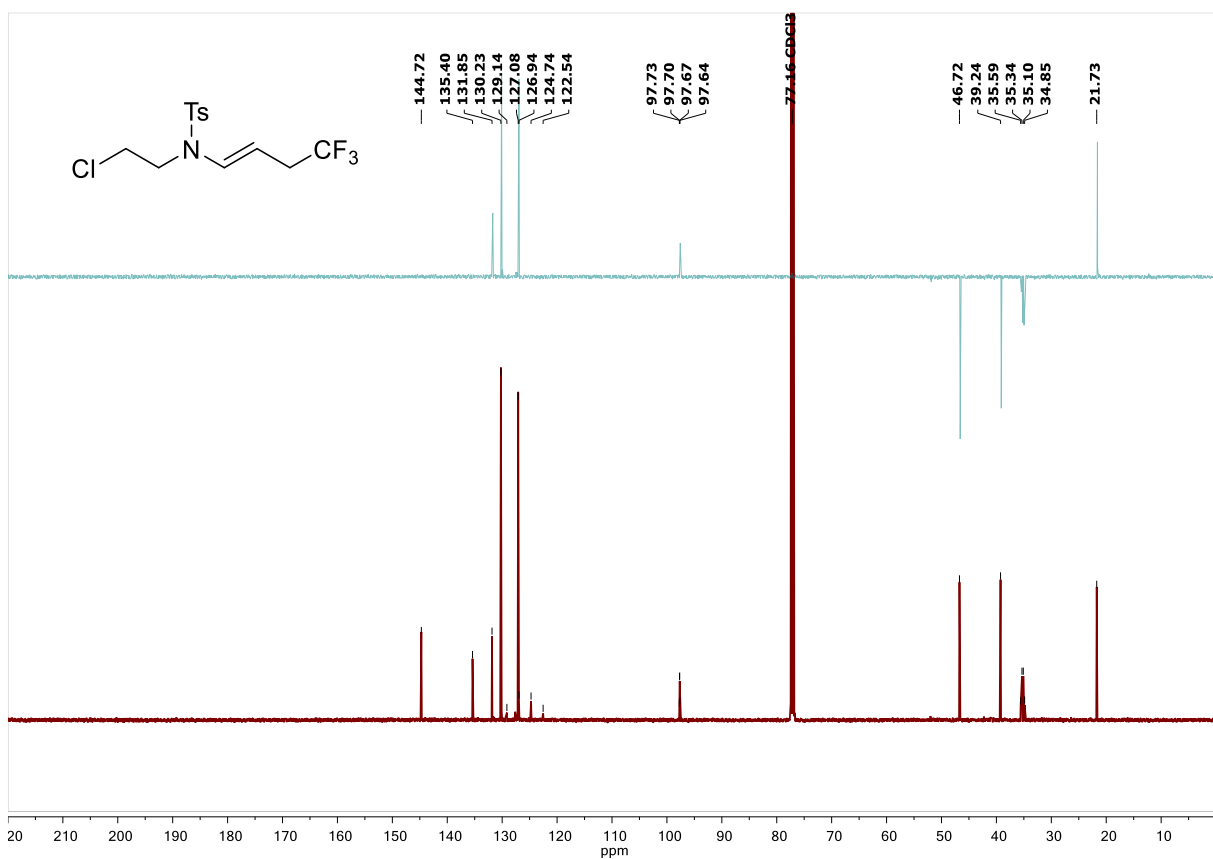

<sup>13</sup>C{<sup>1</sup>H} NMR (CDCl<sub>3</sub>, 126 MHz) of **31**

S93

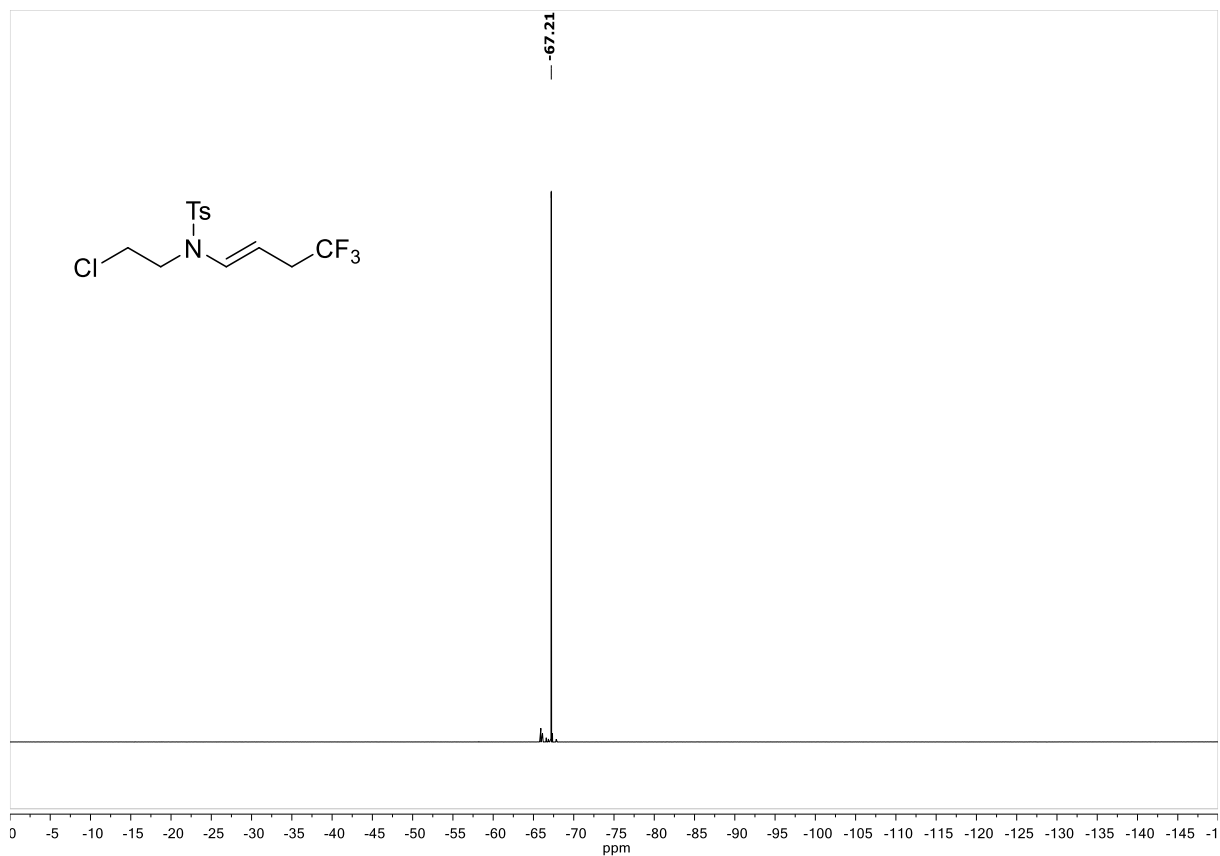

$^{19}\text{F}\{^1\text{H}\}$  NMR ( $\text{CDCl}_3$ , 282 MHz) of **3I**

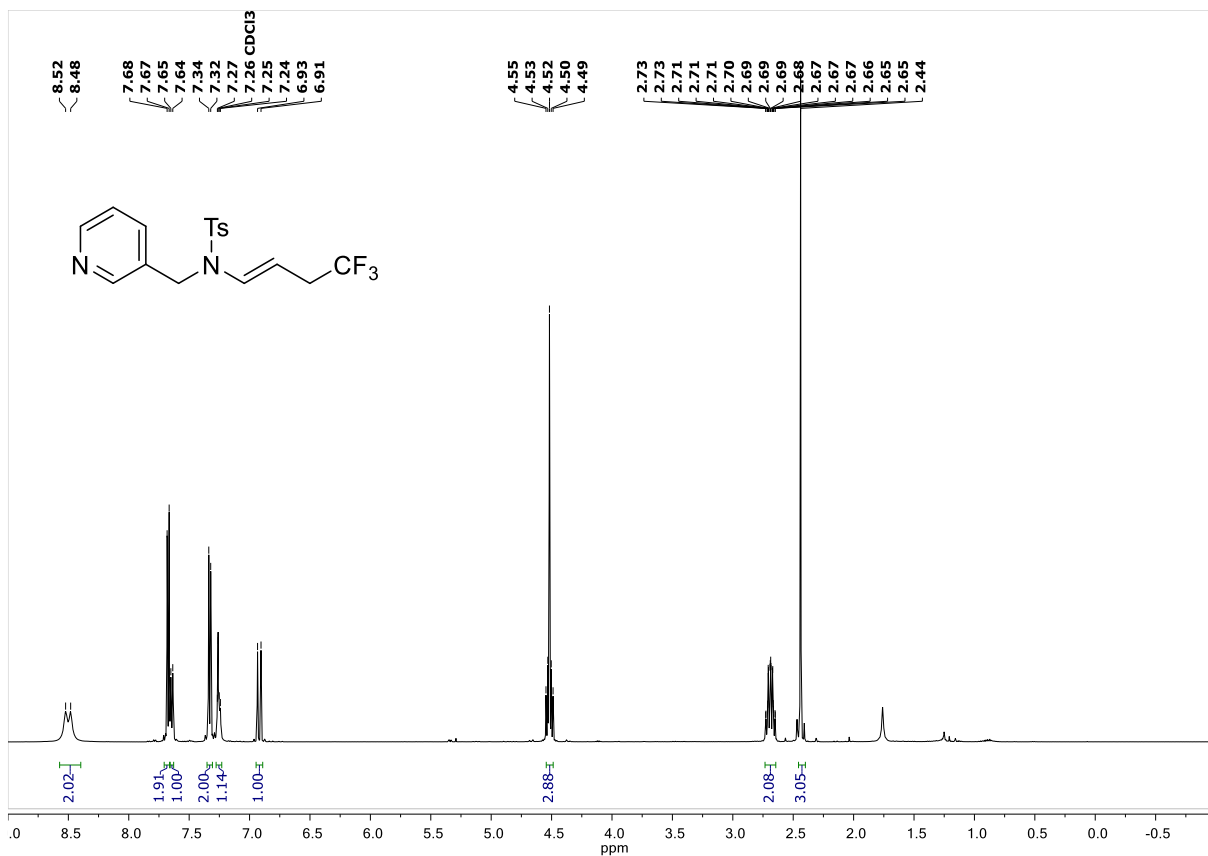

**<sup>1</sup>H NMR (CDCl<sub>3</sub>, 500 MHz) of 3m**

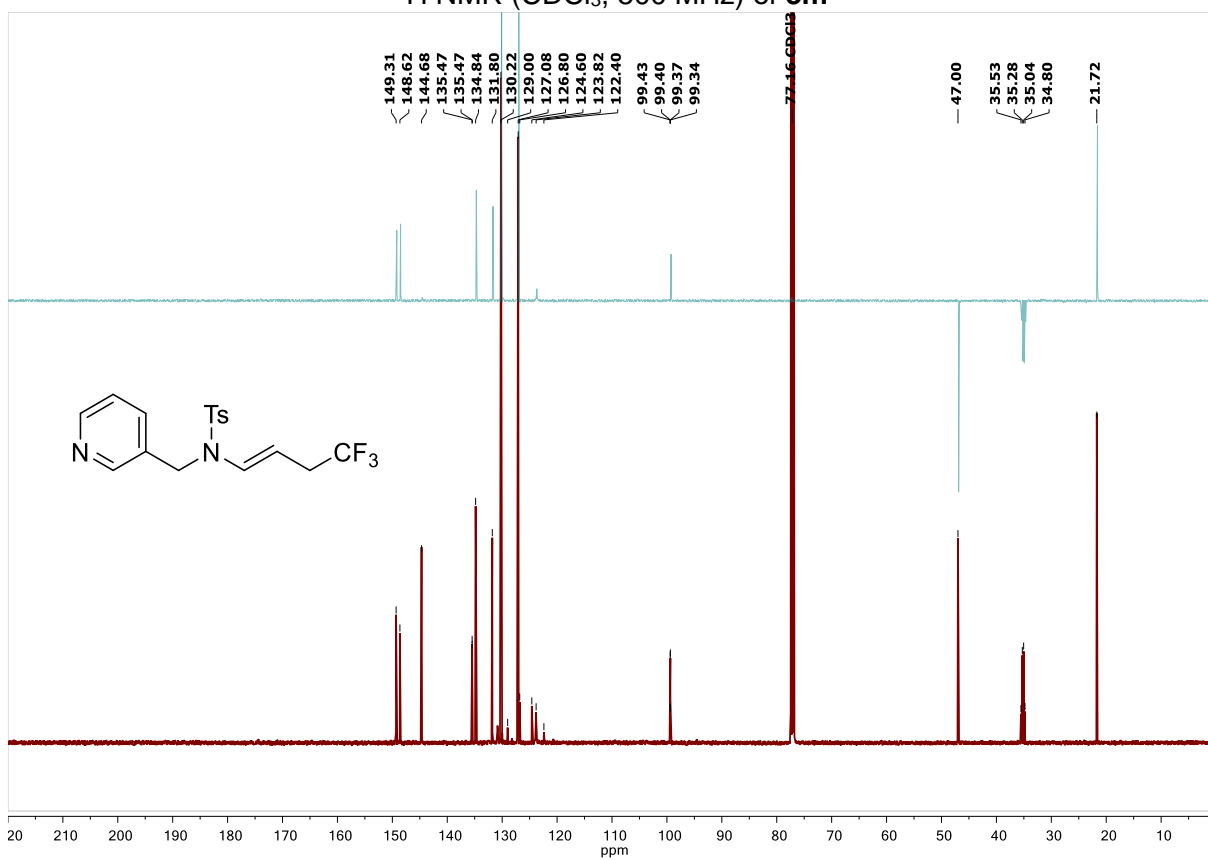

**<sup>13</sup>C{<sup>1</sup>H} NMR (CDCl<sub>3</sub>, 126 MHz) of 3m**

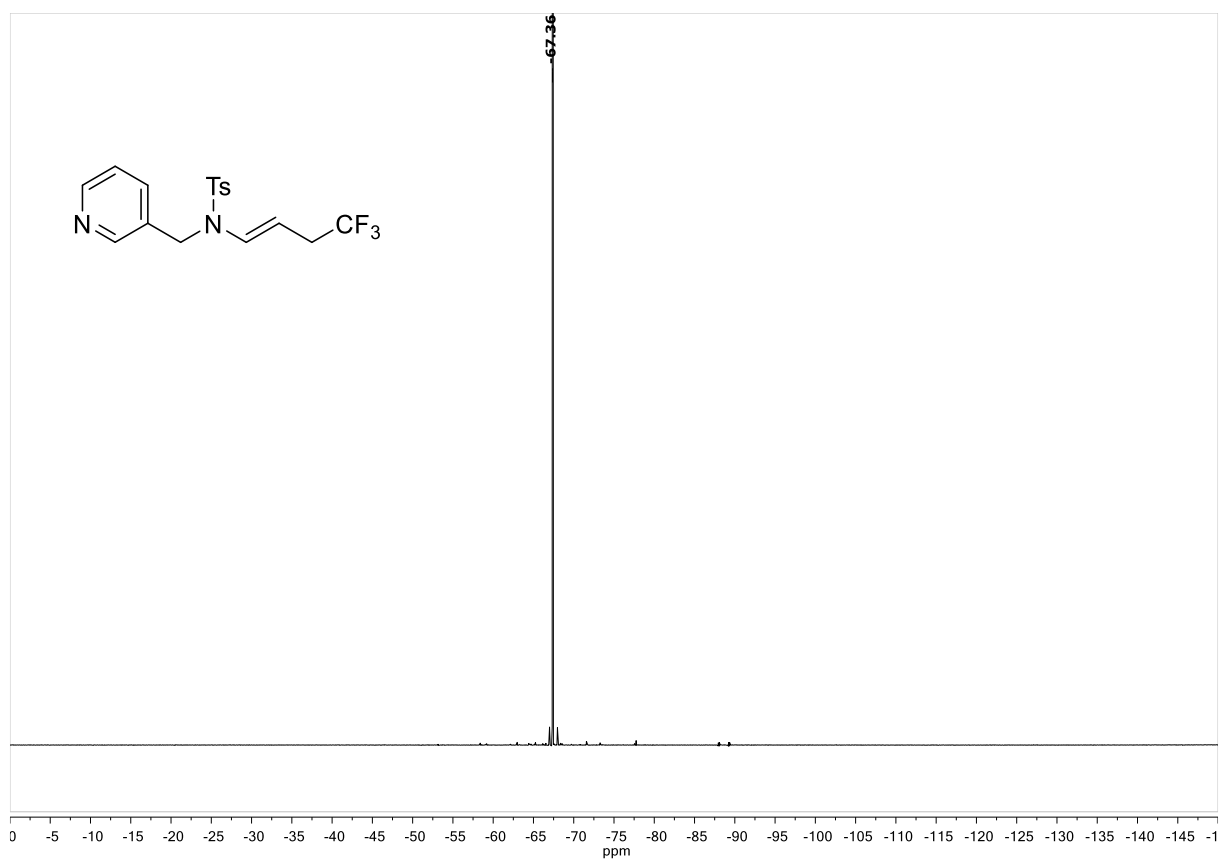

$^{19}\text{F}\{^1\text{H}\}$  NMR ( $\text{CDCl}_3$ , 282 MHz) of **3m**



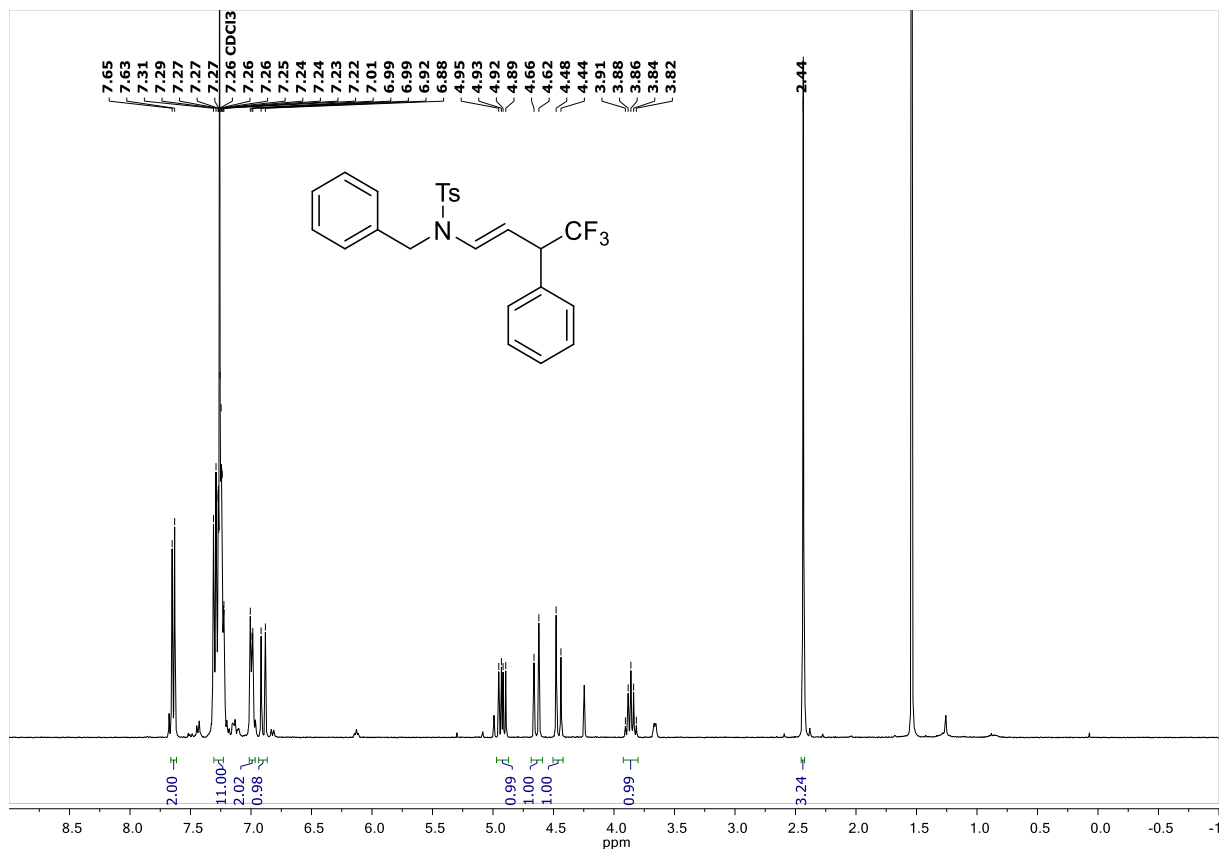

**<sup>1</sup>H NMR (CDCl<sub>3</sub>, 400 MHz) of 3n**

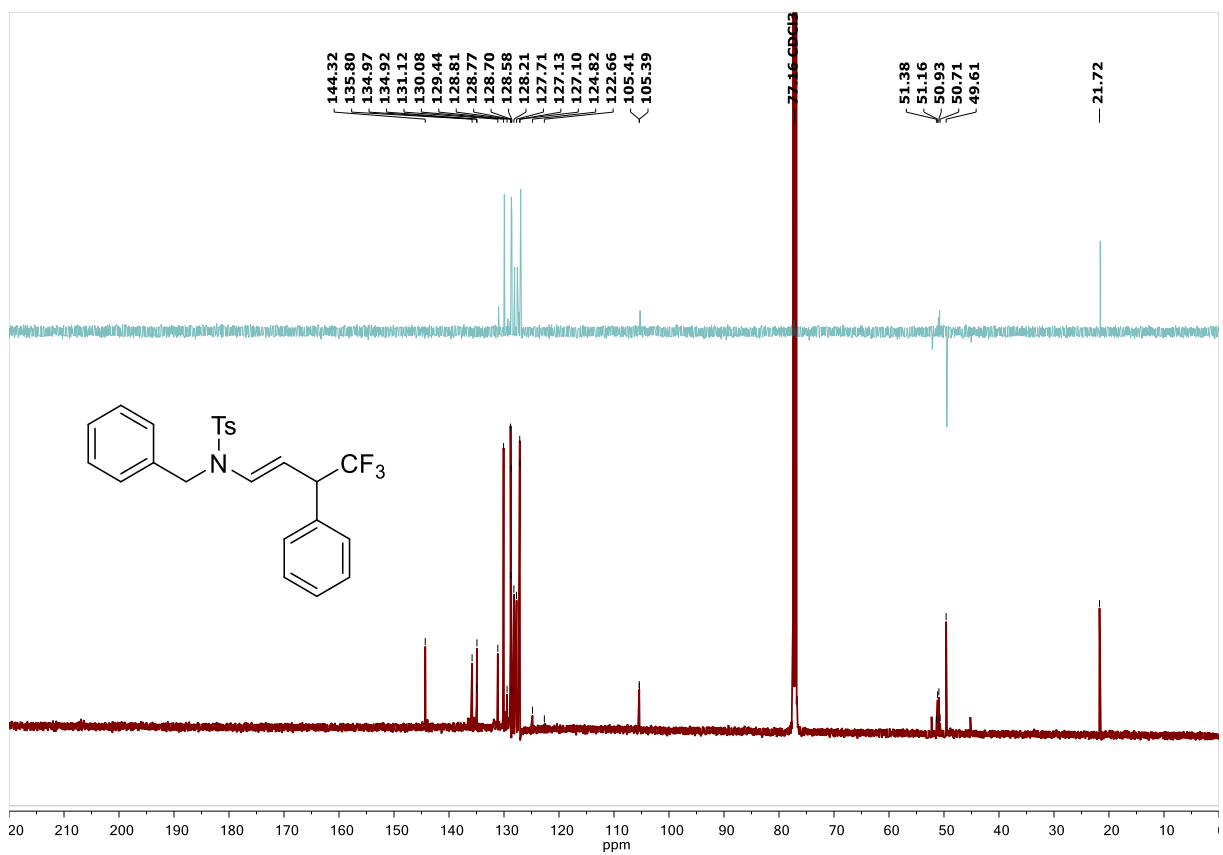

**<sup>13</sup>C{<sup>1</sup>H} NMR (CDCl<sub>3</sub>, 126 MHz) of 3n**

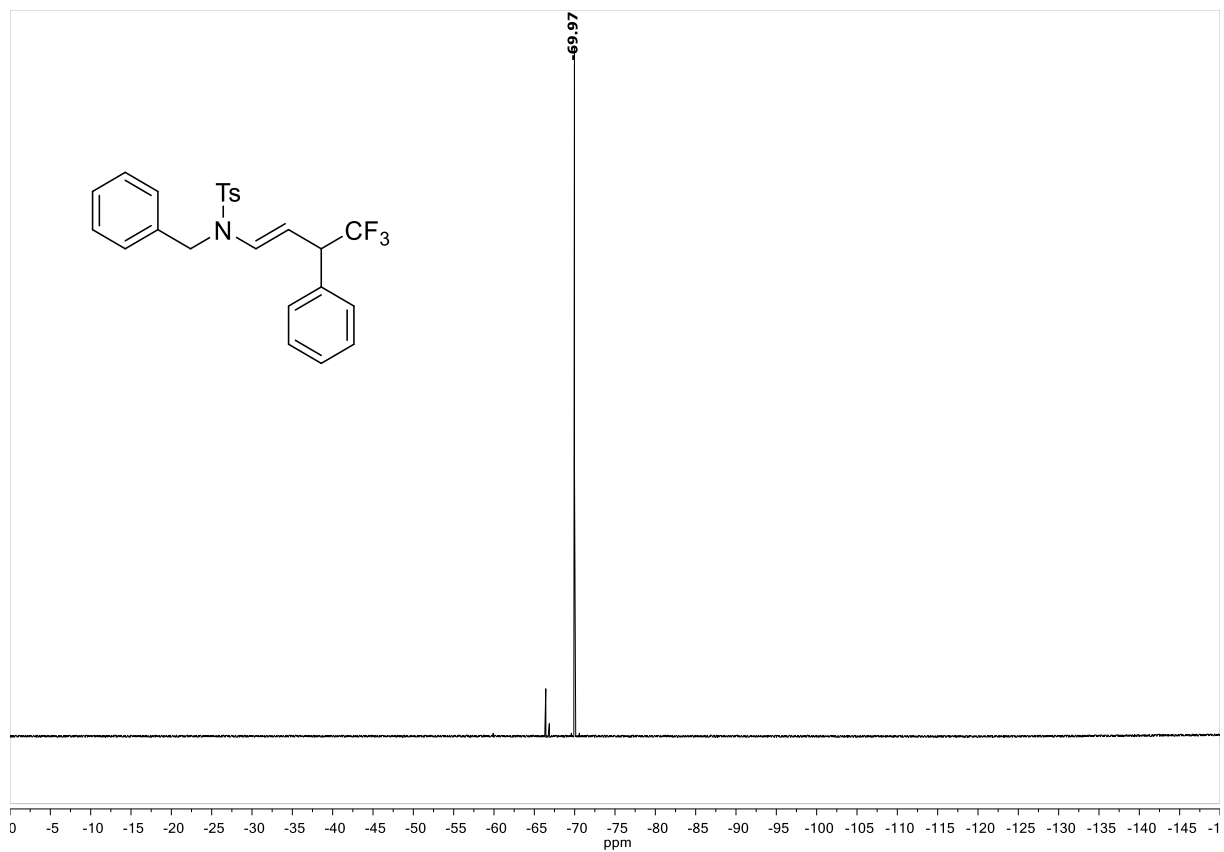

$^{19}\text{F}\{^1\text{H}\}$  NMR ( $\text{CDCl}_3$ , 282 MHz) of **3n**

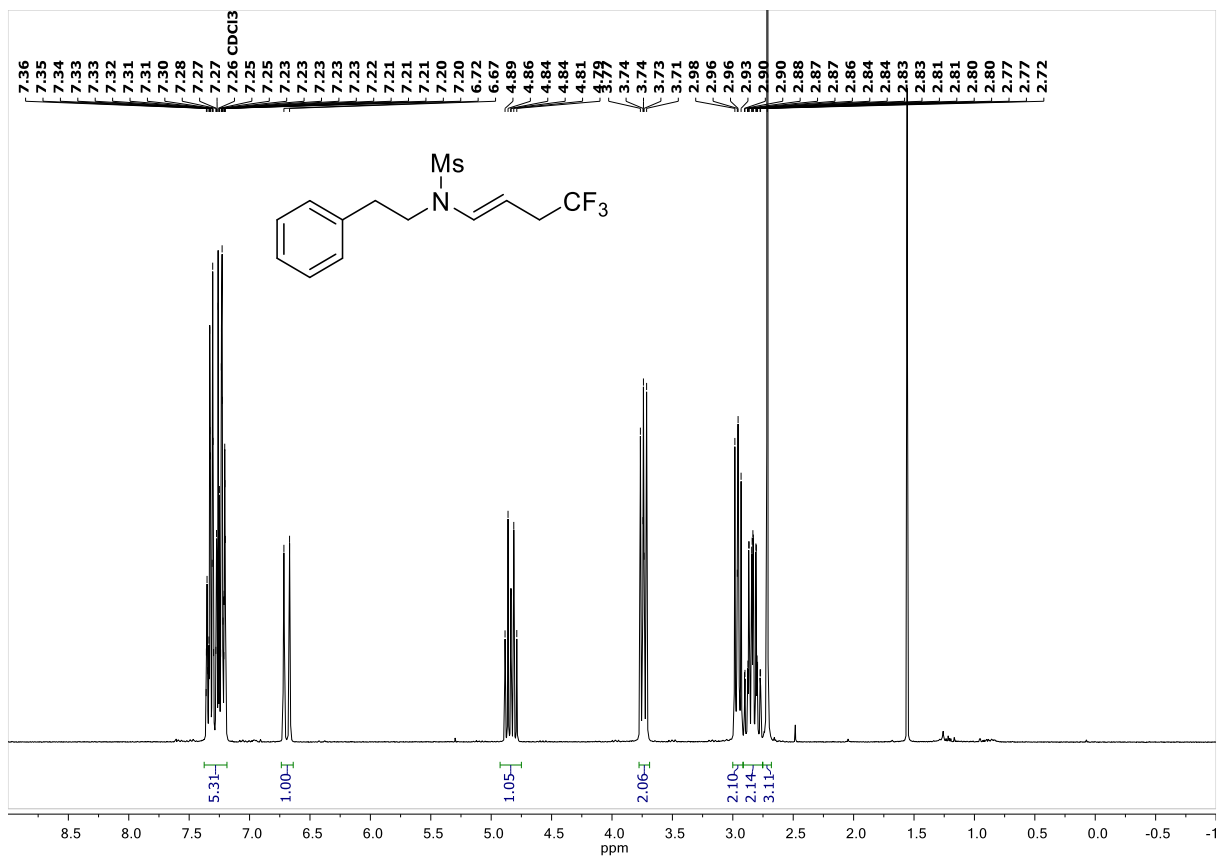

**<sup>1</sup>H NMR (CDCl<sub>3</sub>, 300 MHz) of **3o****

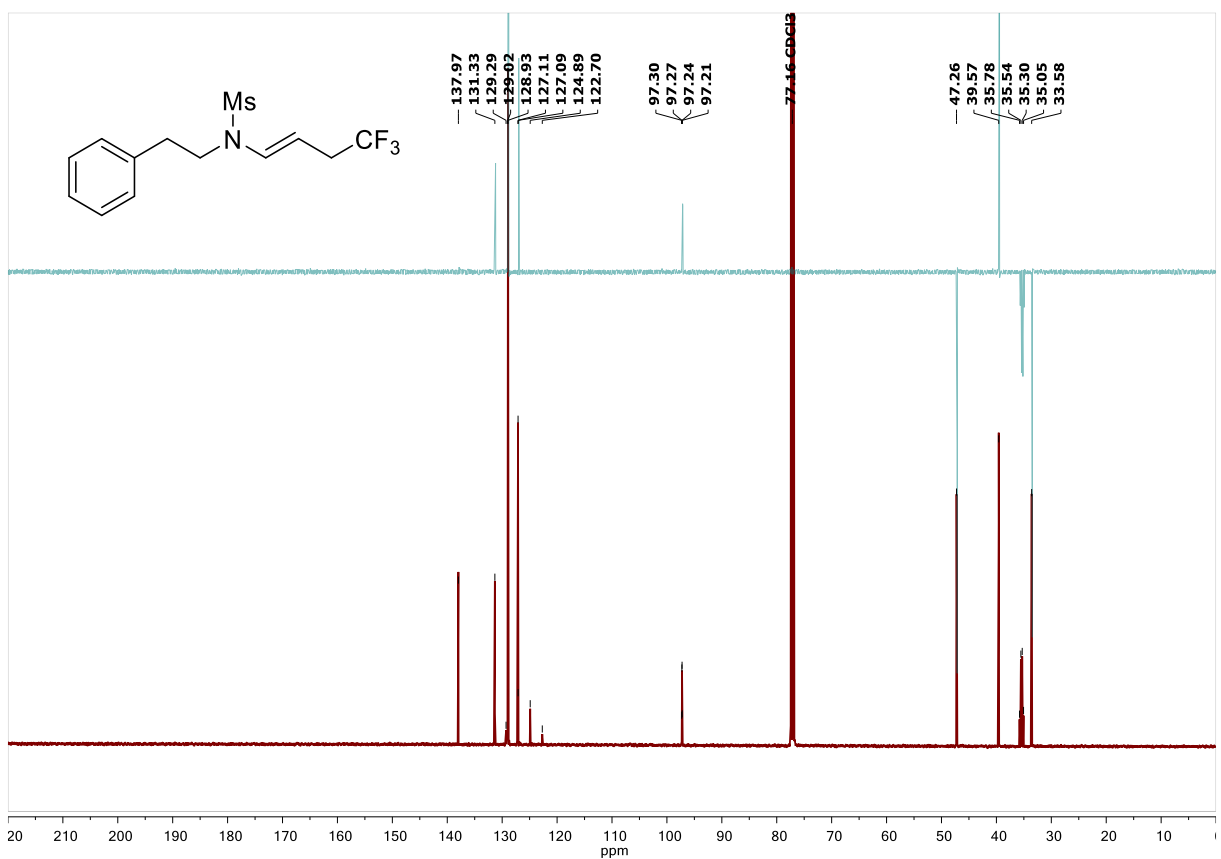

**<sup>13</sup>C{<sup>1</sup>H} NMR (CDCl<sub>3</sub>, 126 MHz) of **3o****

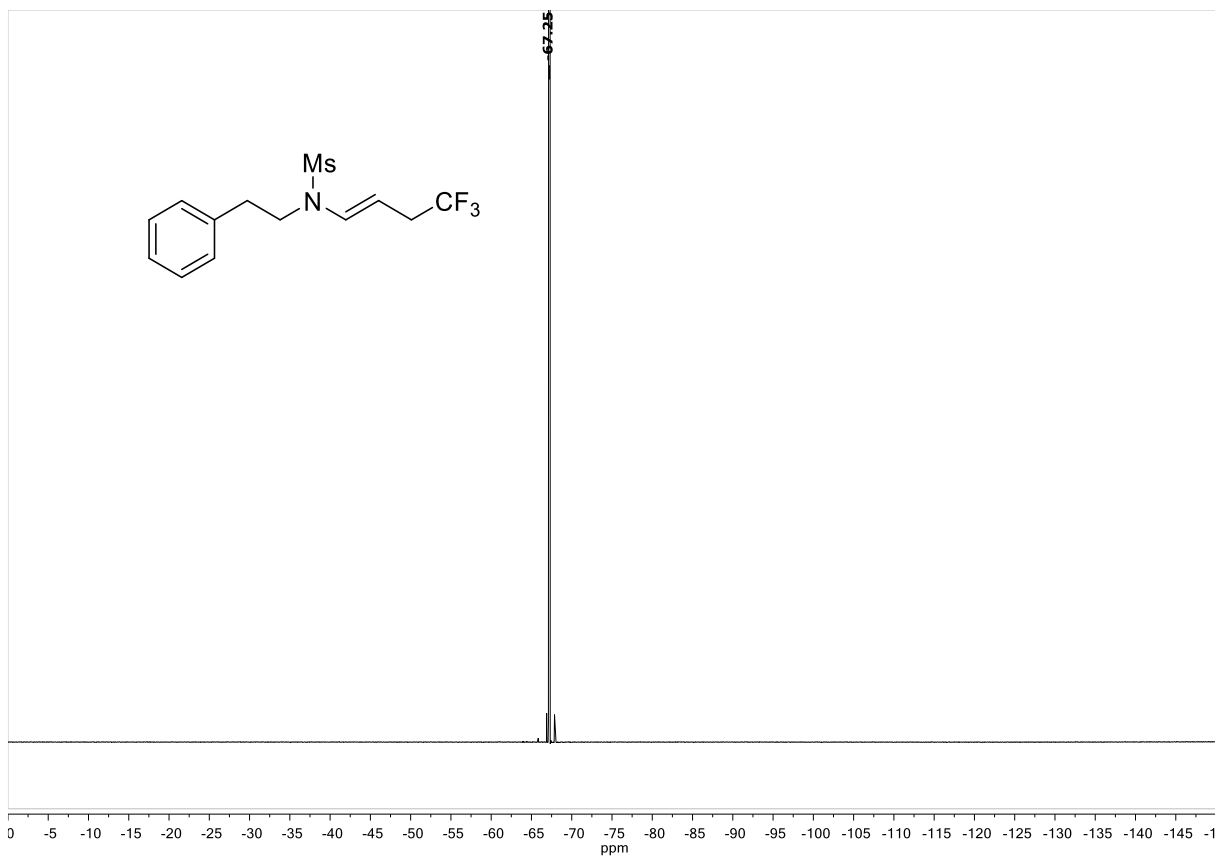

$^{19}\text{F}\{^1\text{H}\}$  NMR ( $\text{CDCl}_3$ , 282 MHz) of **3o**

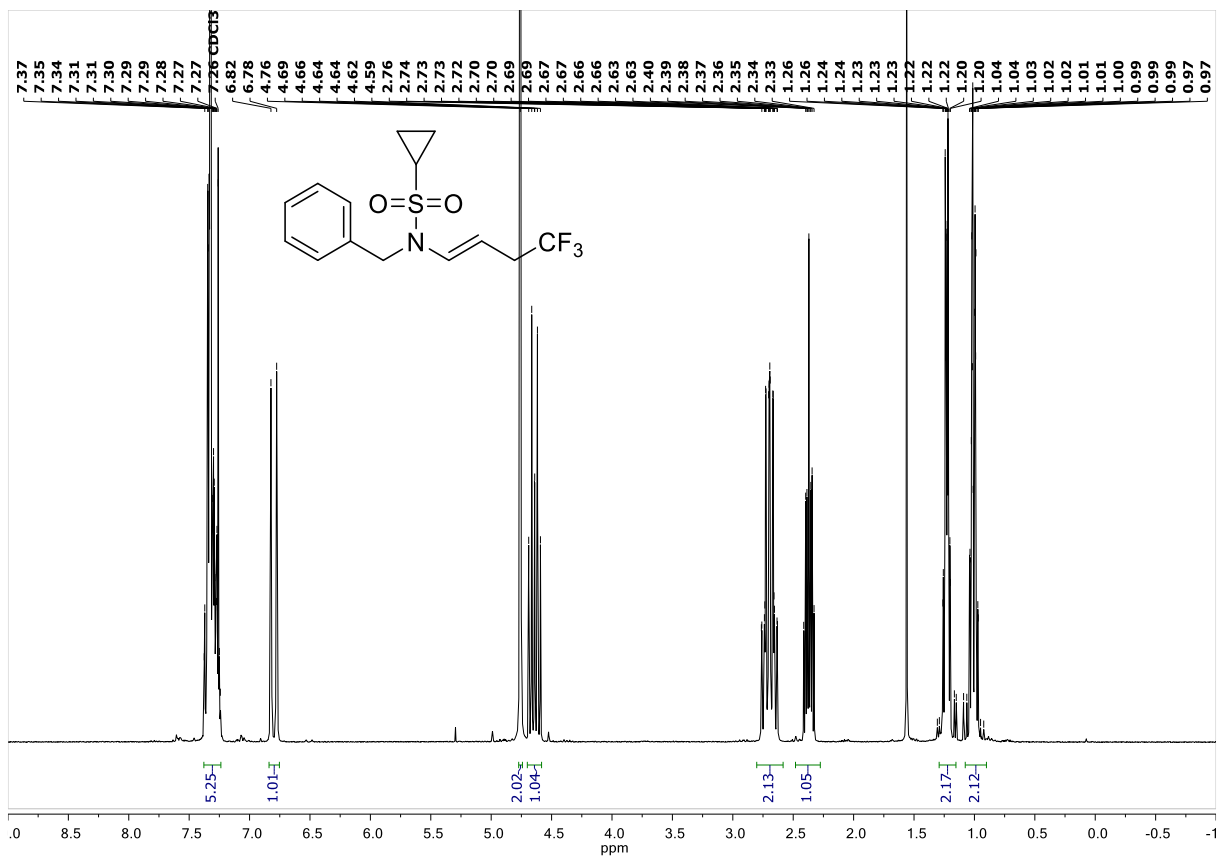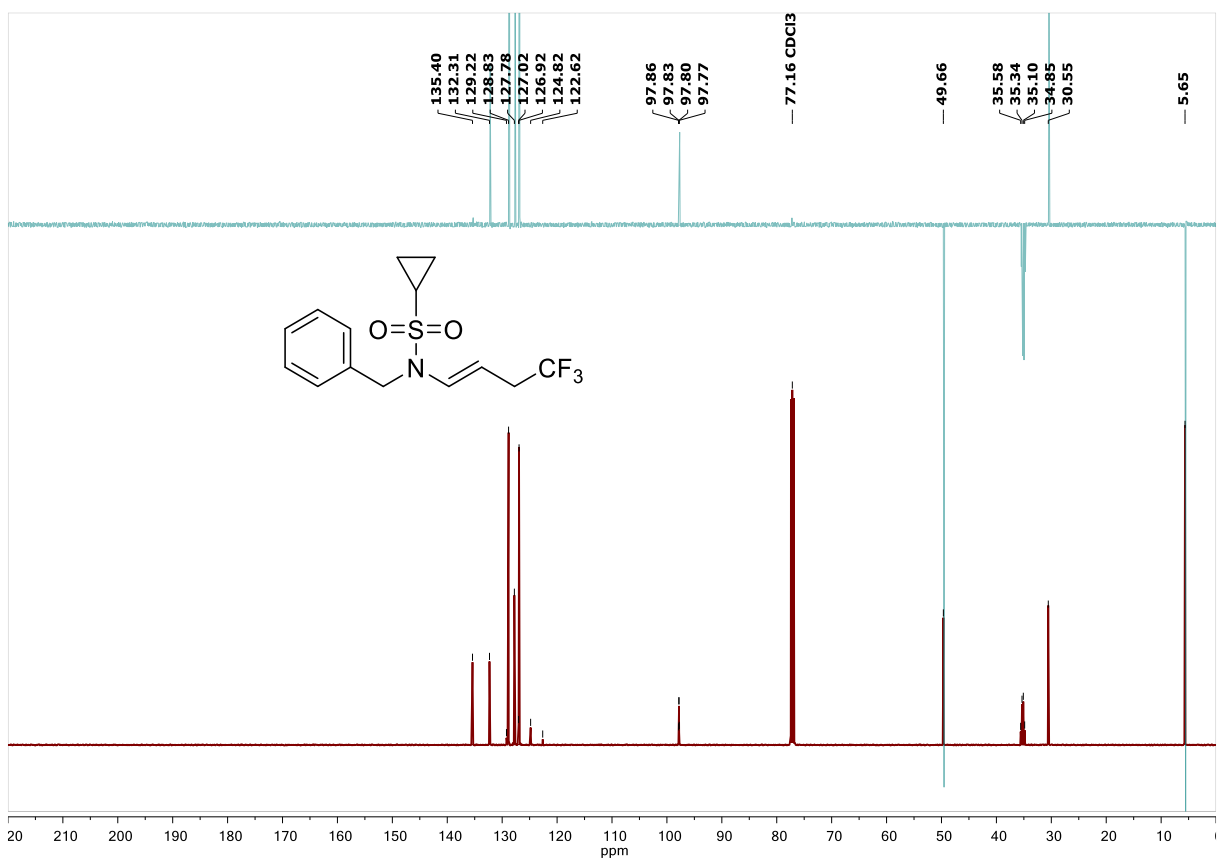

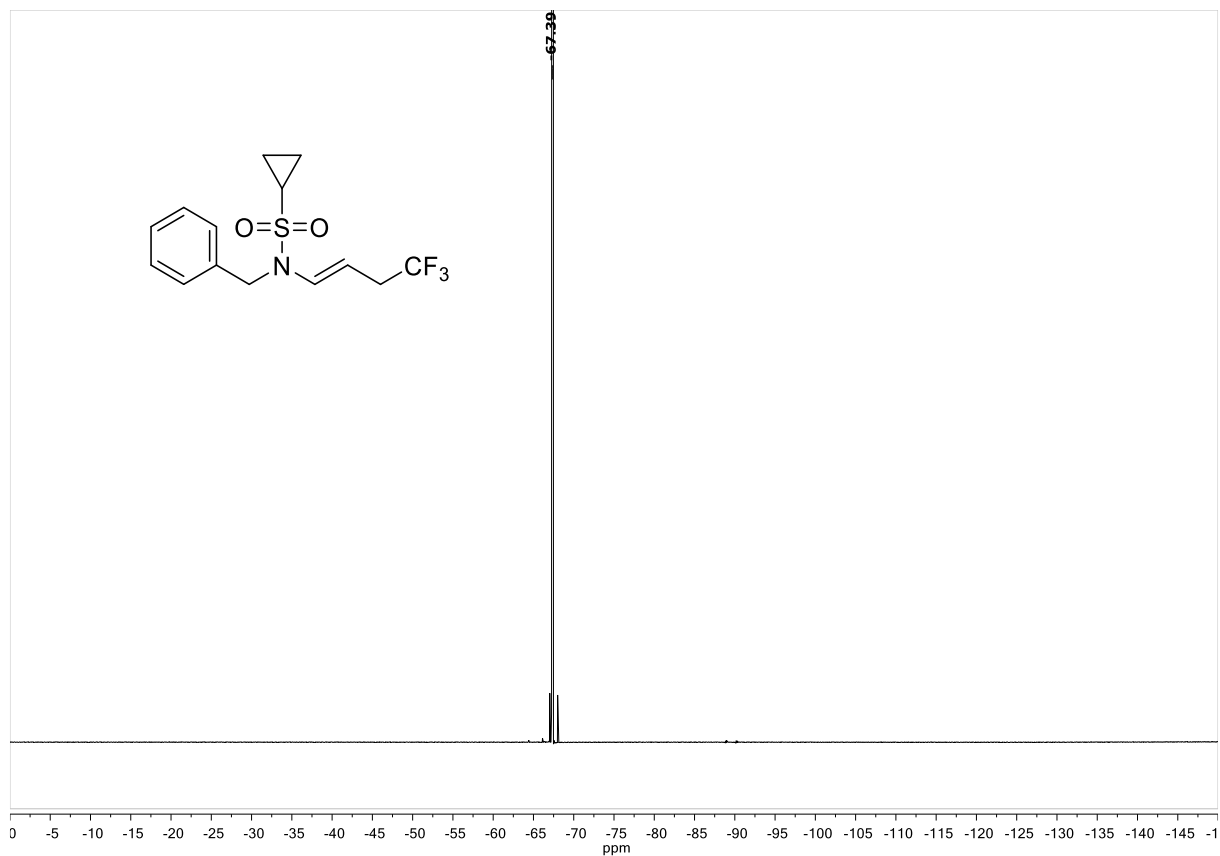

$^{19}\text{F}\{^1\text{H}\}$  NMR ( $\text{CDCl}_3$ , 282 MHz) of **3p**

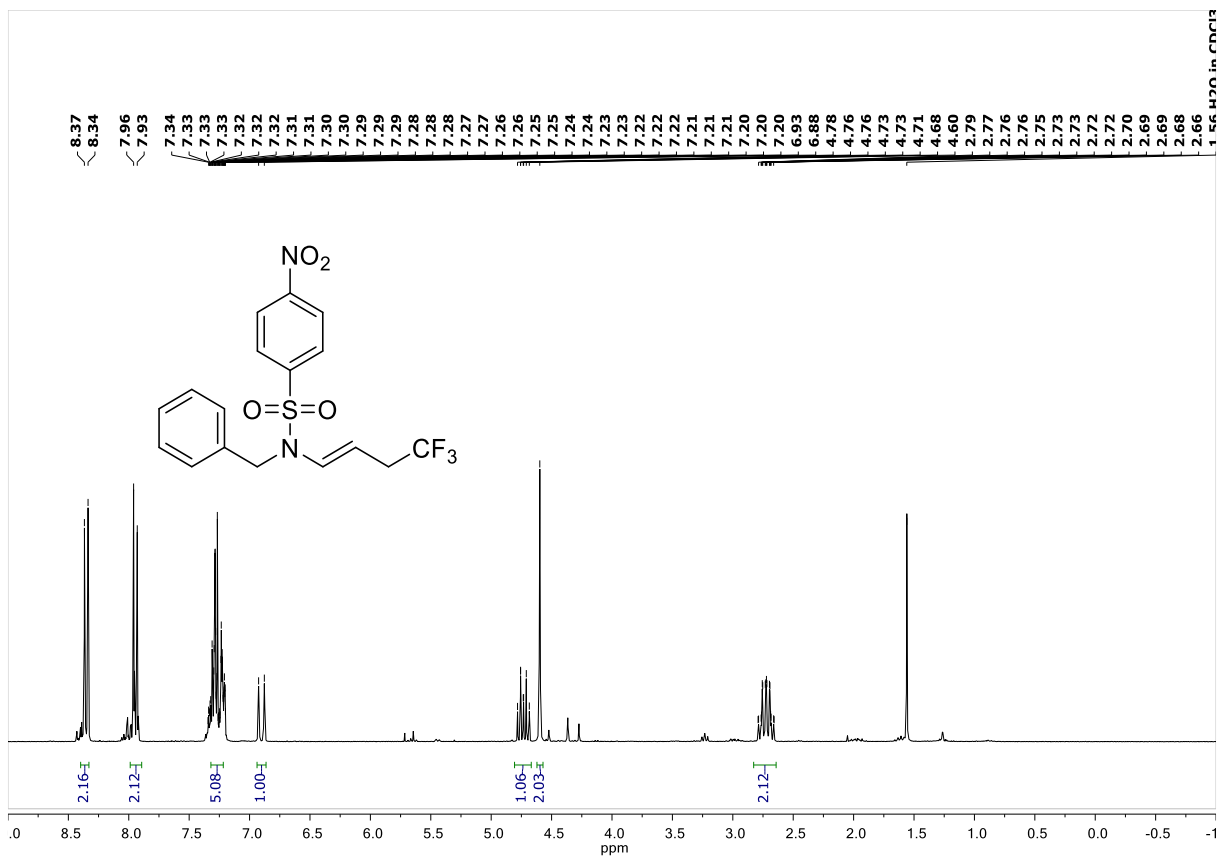

<sup>1</sup>H NMR (CDCl<sub>3</sub>, 300 MHz) of **3q**

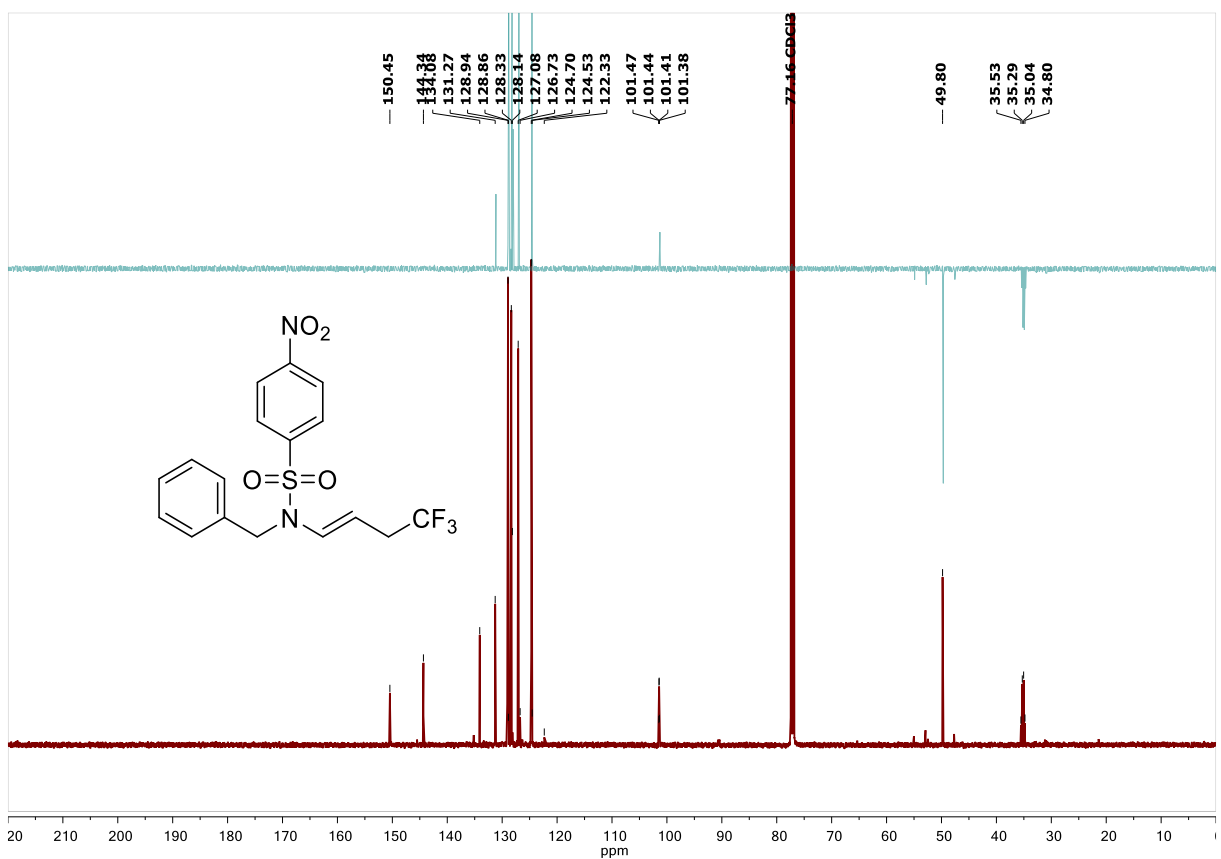

<sup>13</sup>C{<sup>1</sup>H} NMR (CDCl<sub>3</sub>, 126 MHz) of **3q**

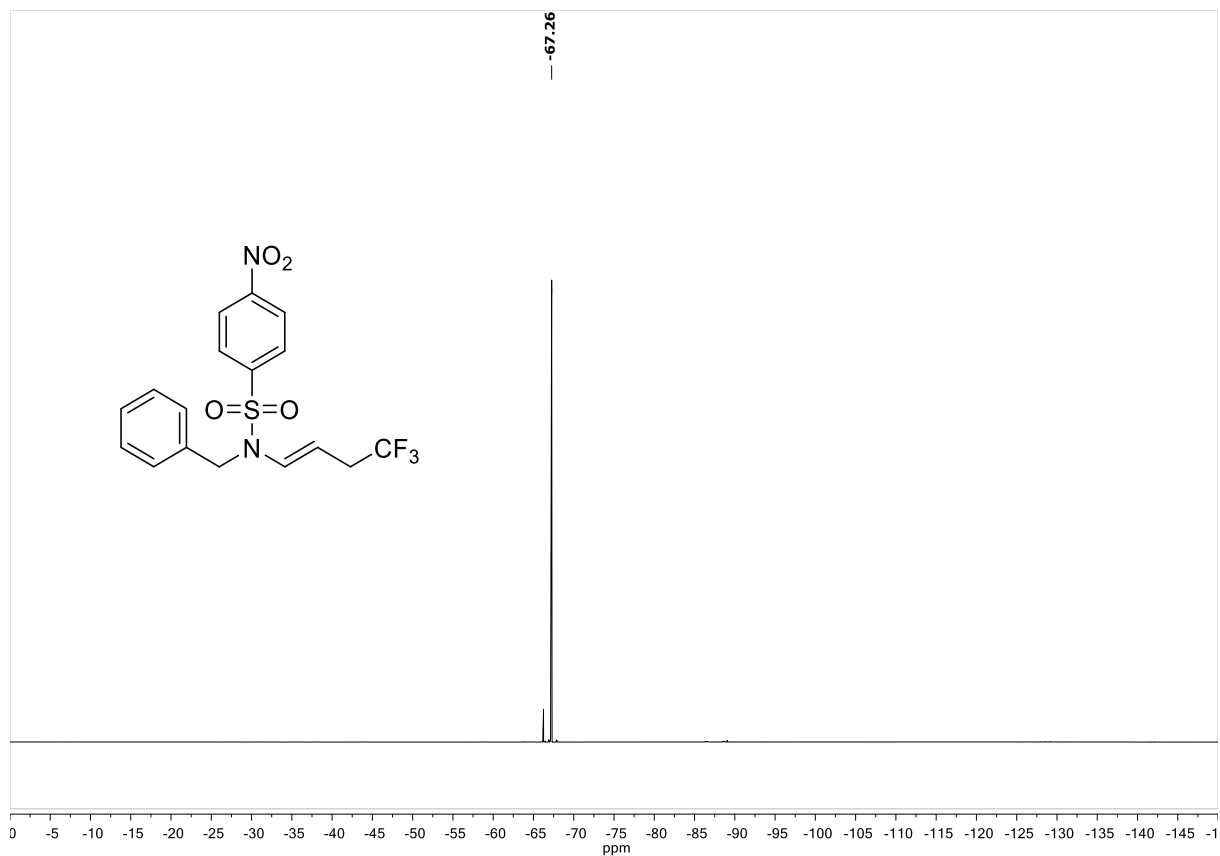

$^{19}\text{F}\{^1\text{H}\}$  NMR ( $\text{CDCl}_3$ , 282 MHz) of **3q**





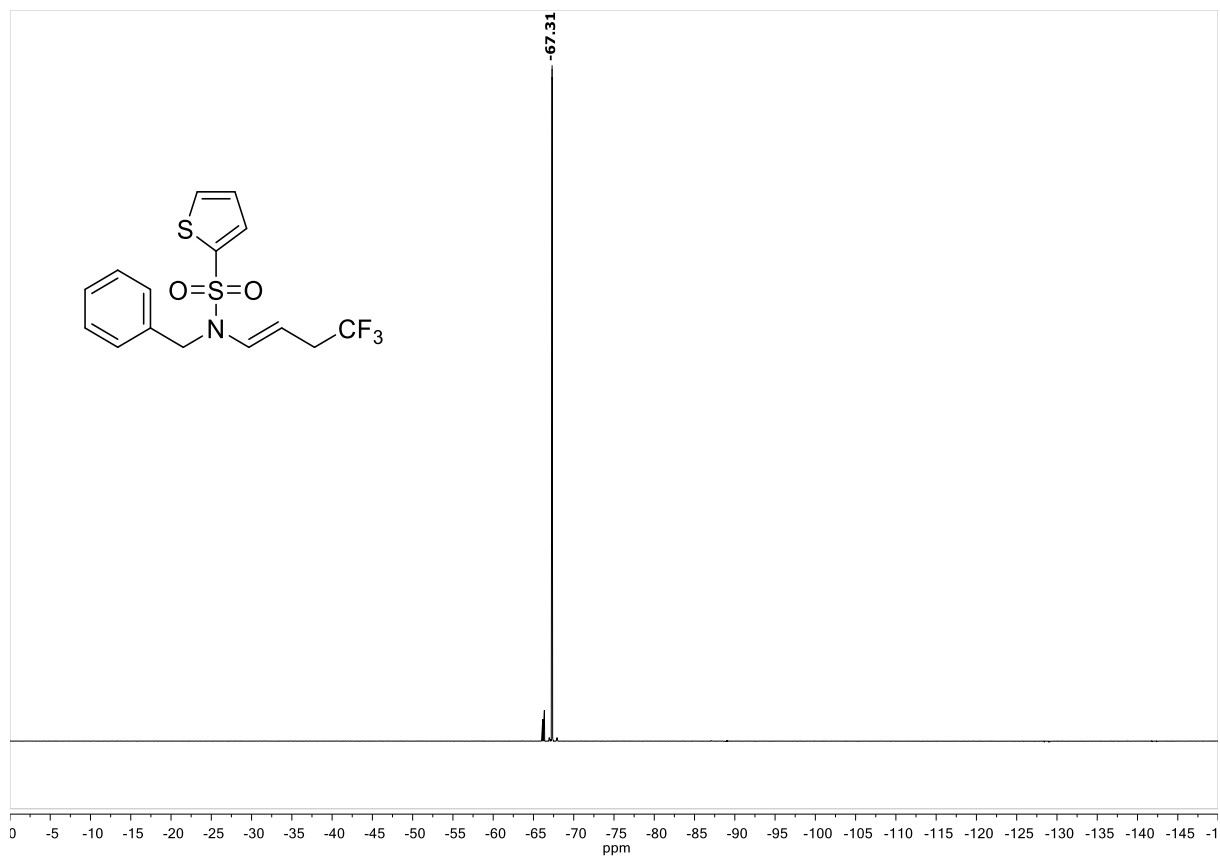

$^{19}\text{F}\{^1\text{H}\}$  NMR ( $\text{CDCl}_3$ , 282 MHz) of **3r**



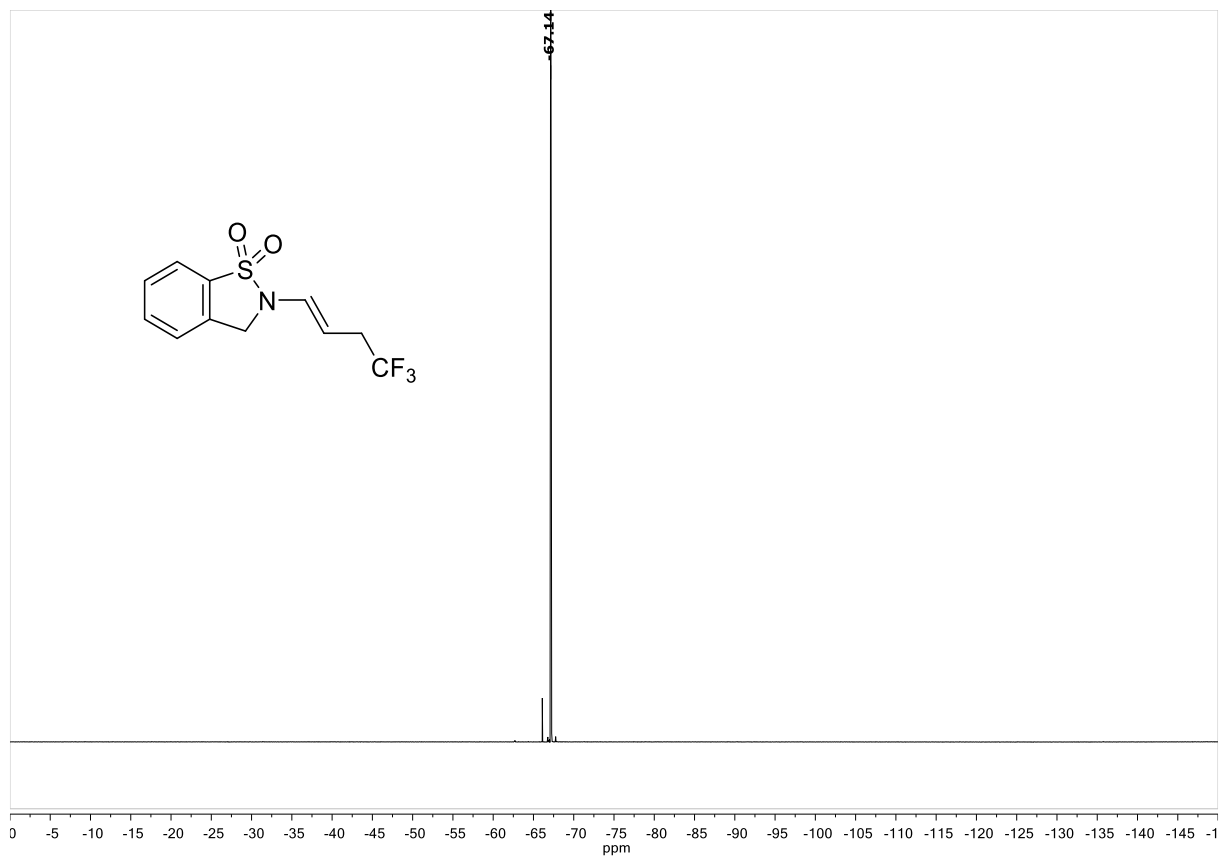

$^{19}\text{F}\{^1\text{H}\}$  NMR ( $\text{CDCl}_3$ , 282 MHz) of **3s**

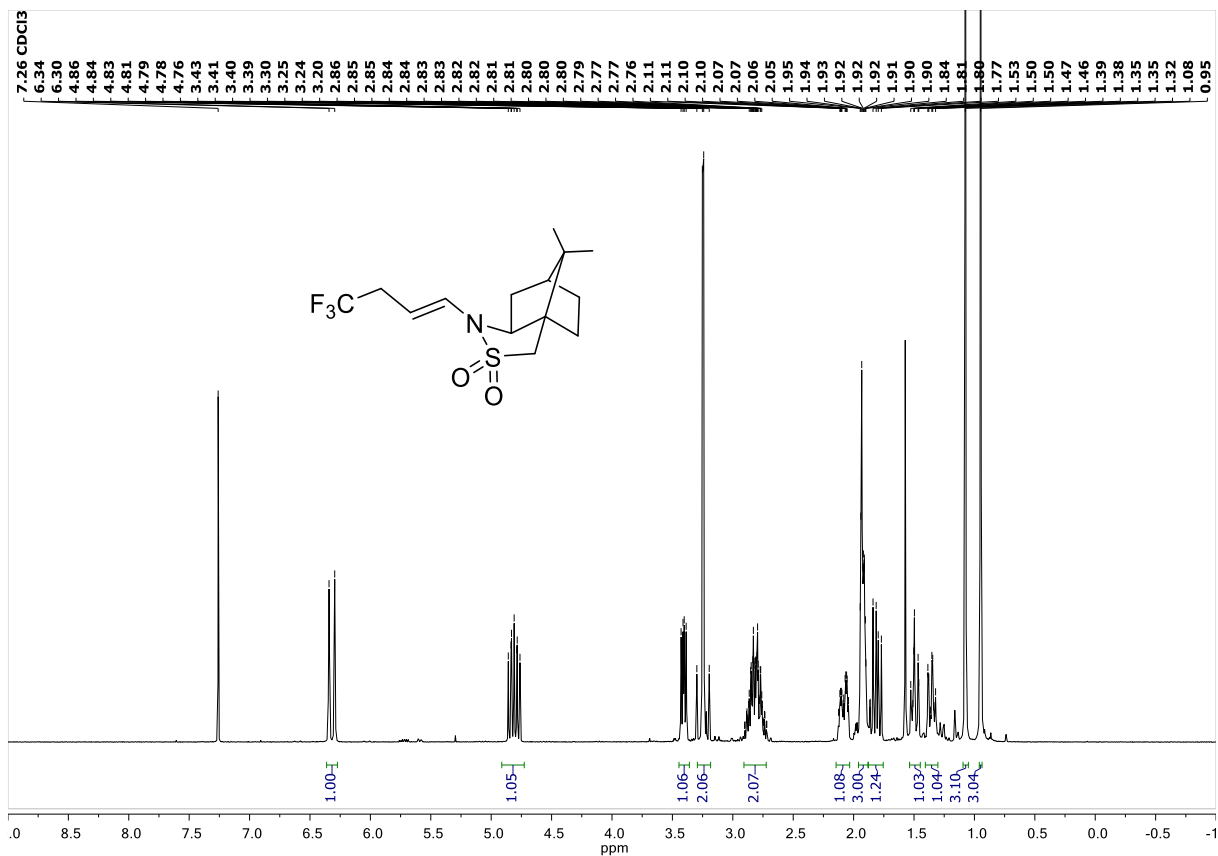

**<sup>1</sup>H NMR (CDCl<sub>3</sub>, 300 MHz) of 3t**

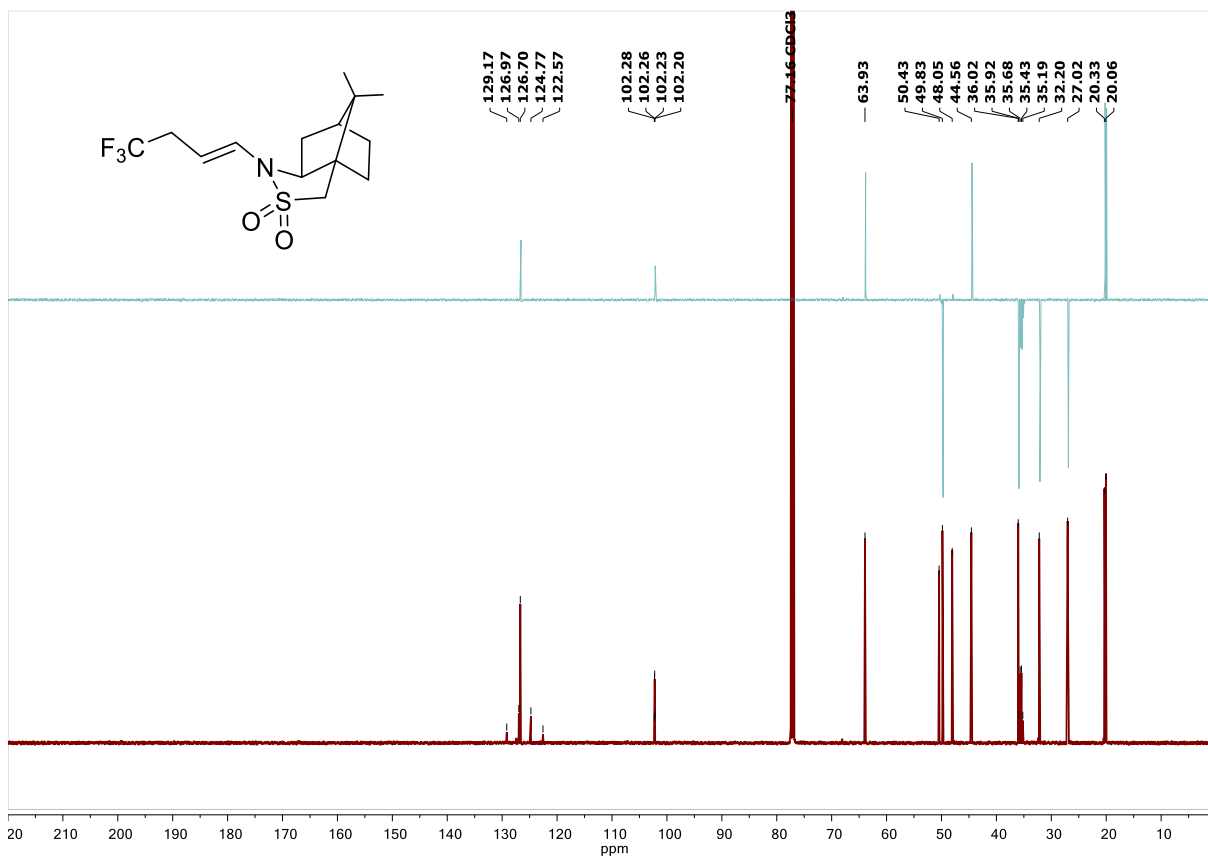

**<sup>13</sup>C{<sup>1</sup>H} NMR (CDCl<sub>3</sub>, 126 MHz) of 3t**

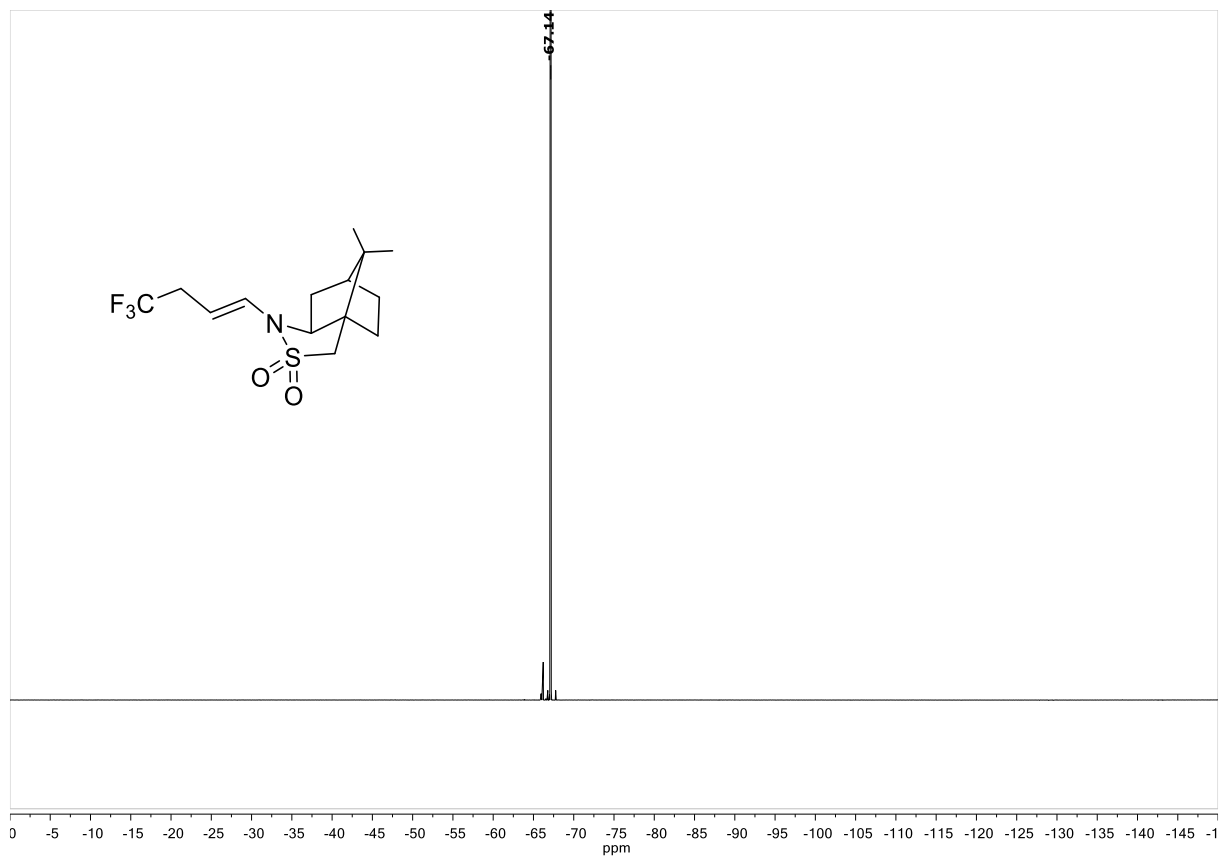

$^{19}\text{F}\{^1\text{H}\}$  NMR ( $\text{CDCl}_3$ , 282 MHz) of **3t**

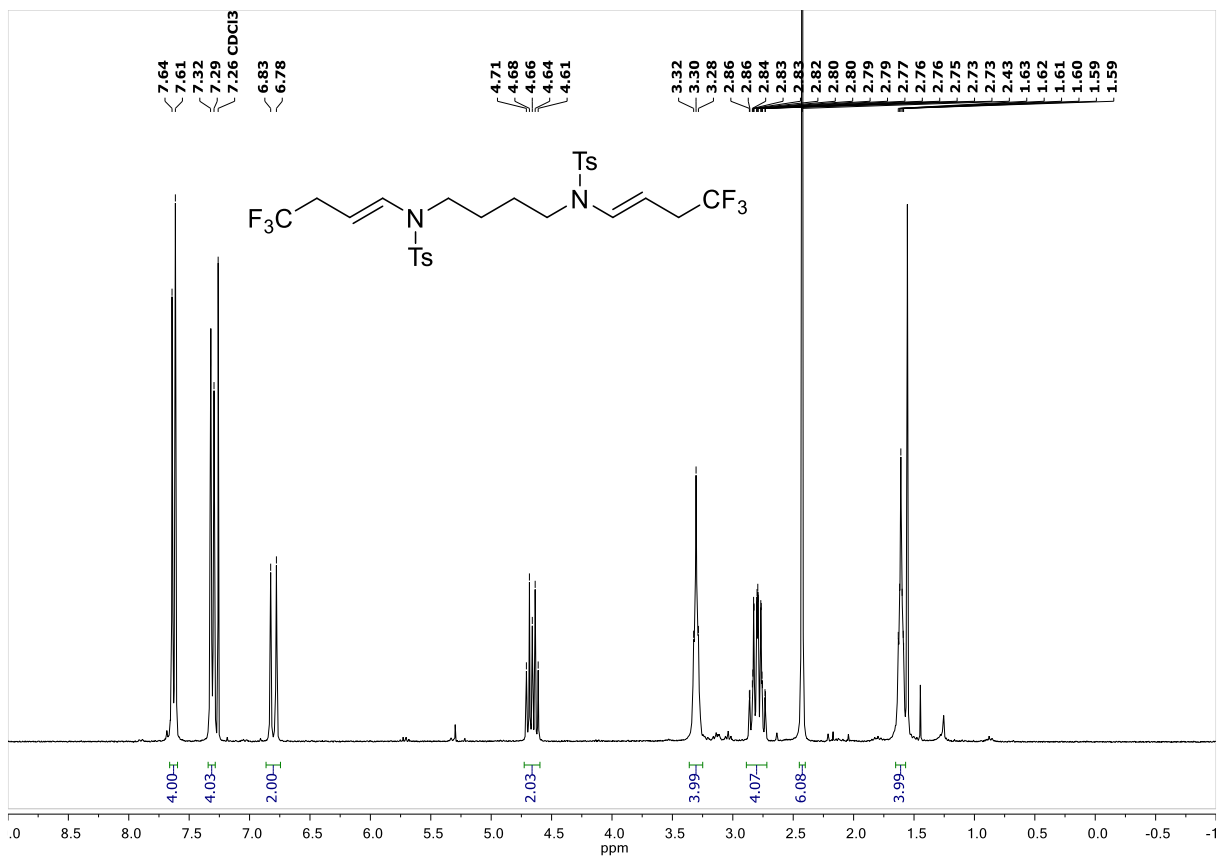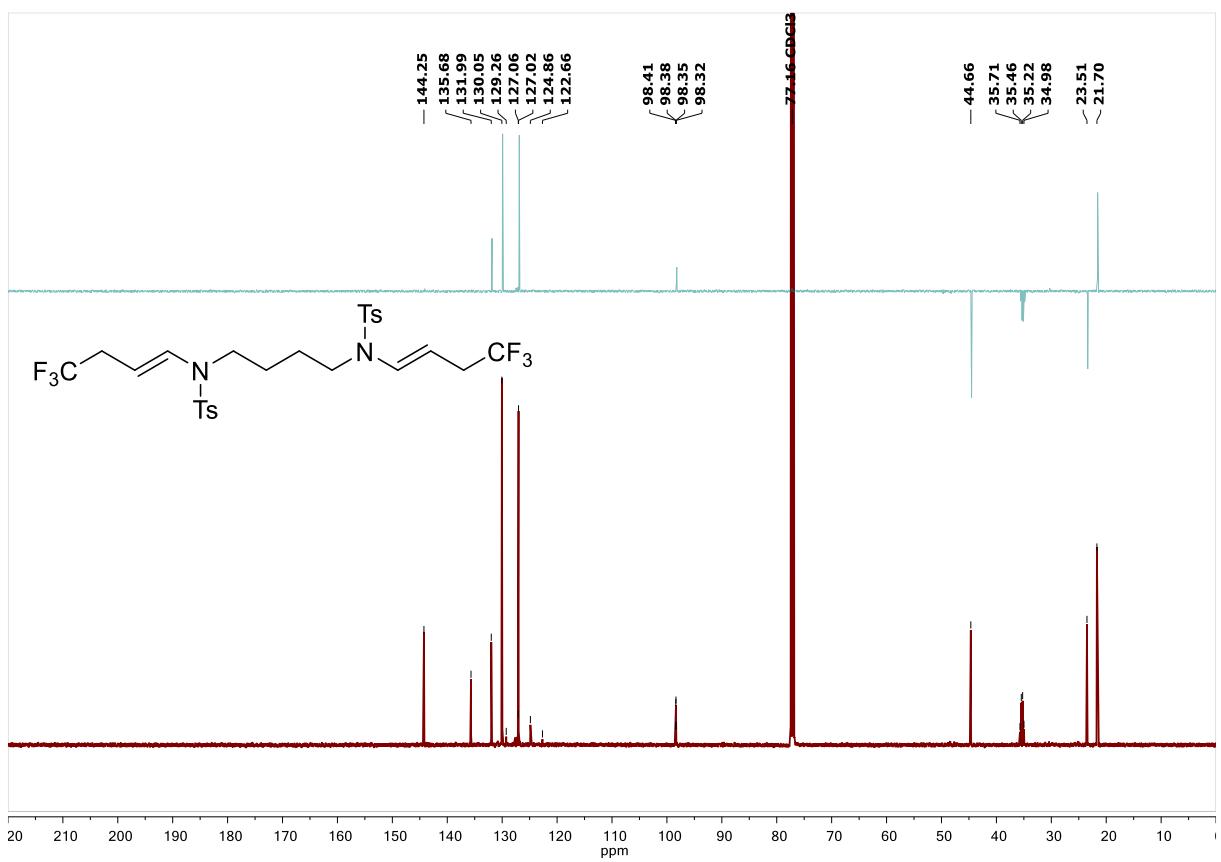

**<sup>13</sup>C{<sup>1</sup>H} NMR (CDCl<sub>3</sub>, 126 MHz) of **3u****  
S111

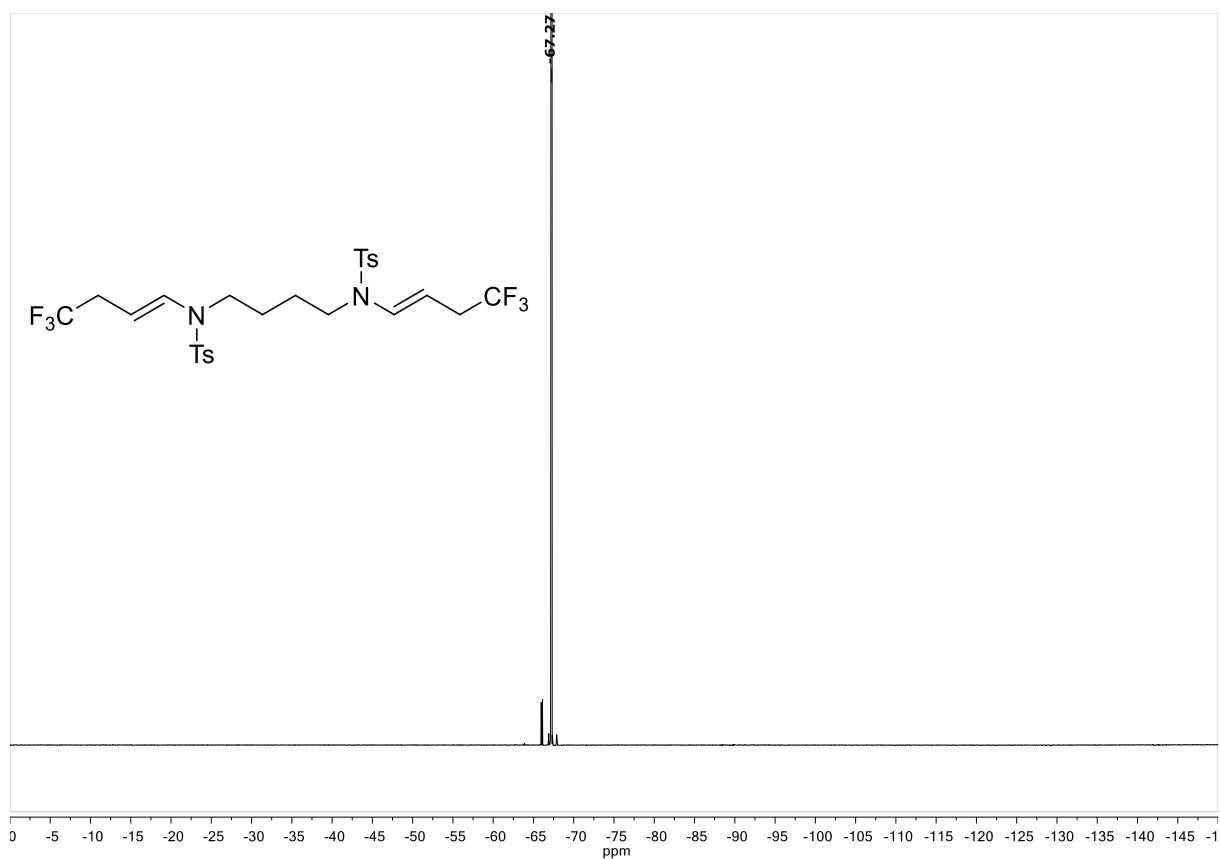

$^{19}\text{F}\{^1\text{H}\}$  NMR ( $\text{CDCl}_3$ , 282 MHz) of **3u**



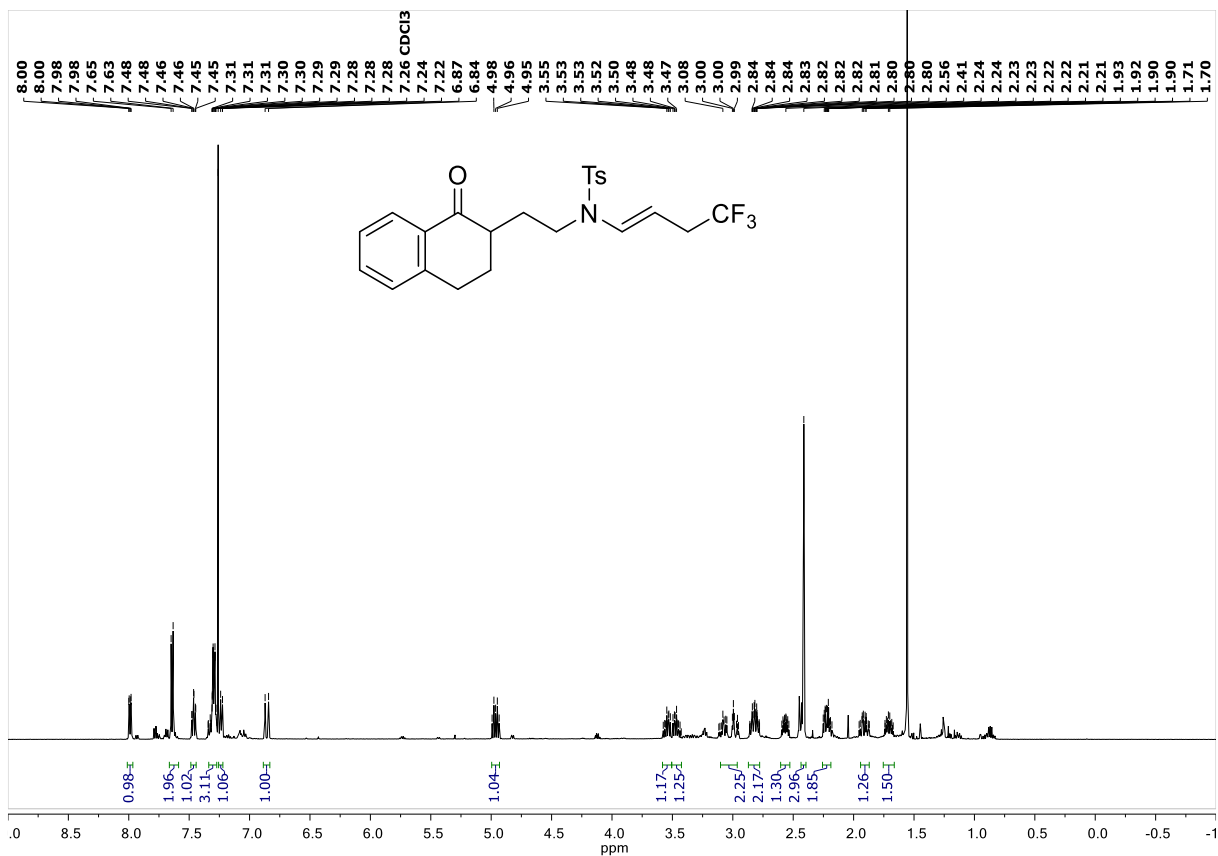

**<sup>1</sup>H NMR (CDCl<sub>3</sub>, 500 MHz) of 3v**

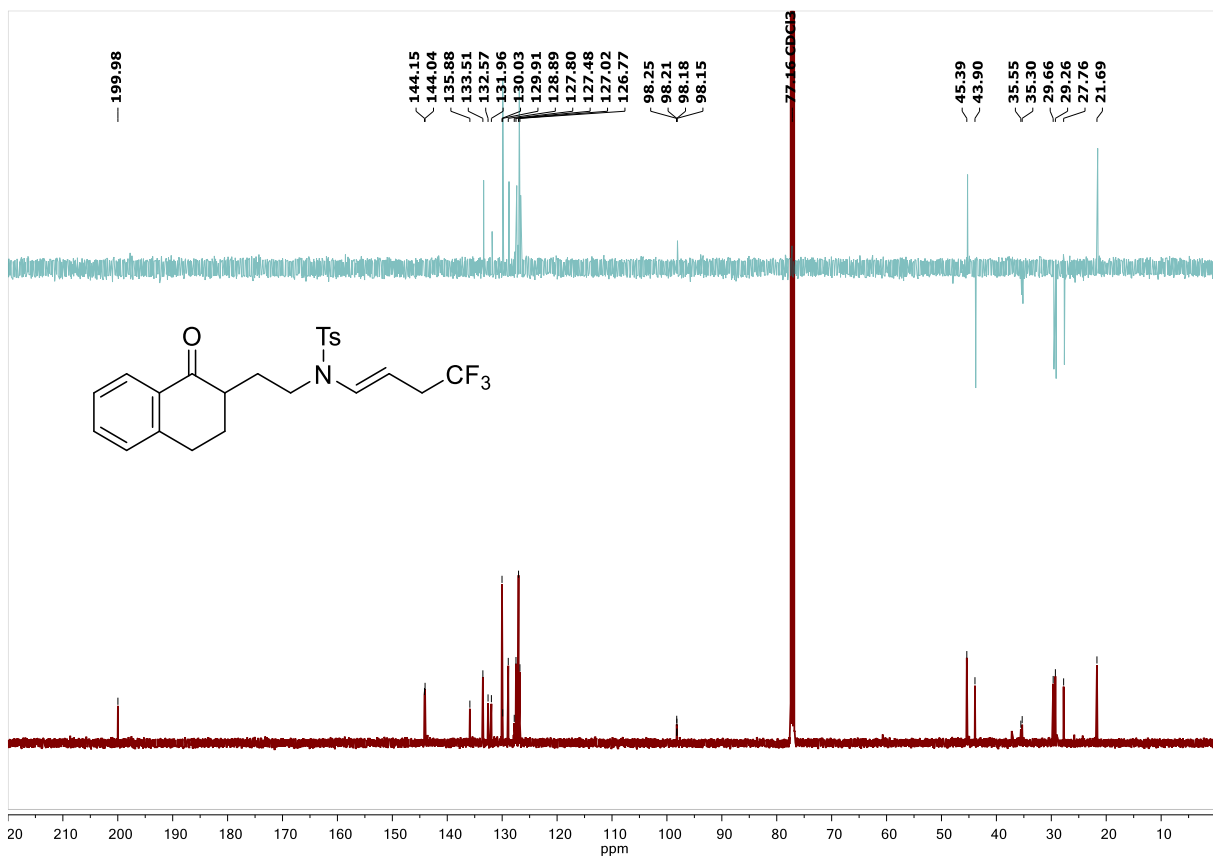

**<sup>13</sup>C{<sup>1</sup>H} NMR (CDCl<sub>3</sub>, 126 MHz) of 3v**  
S113

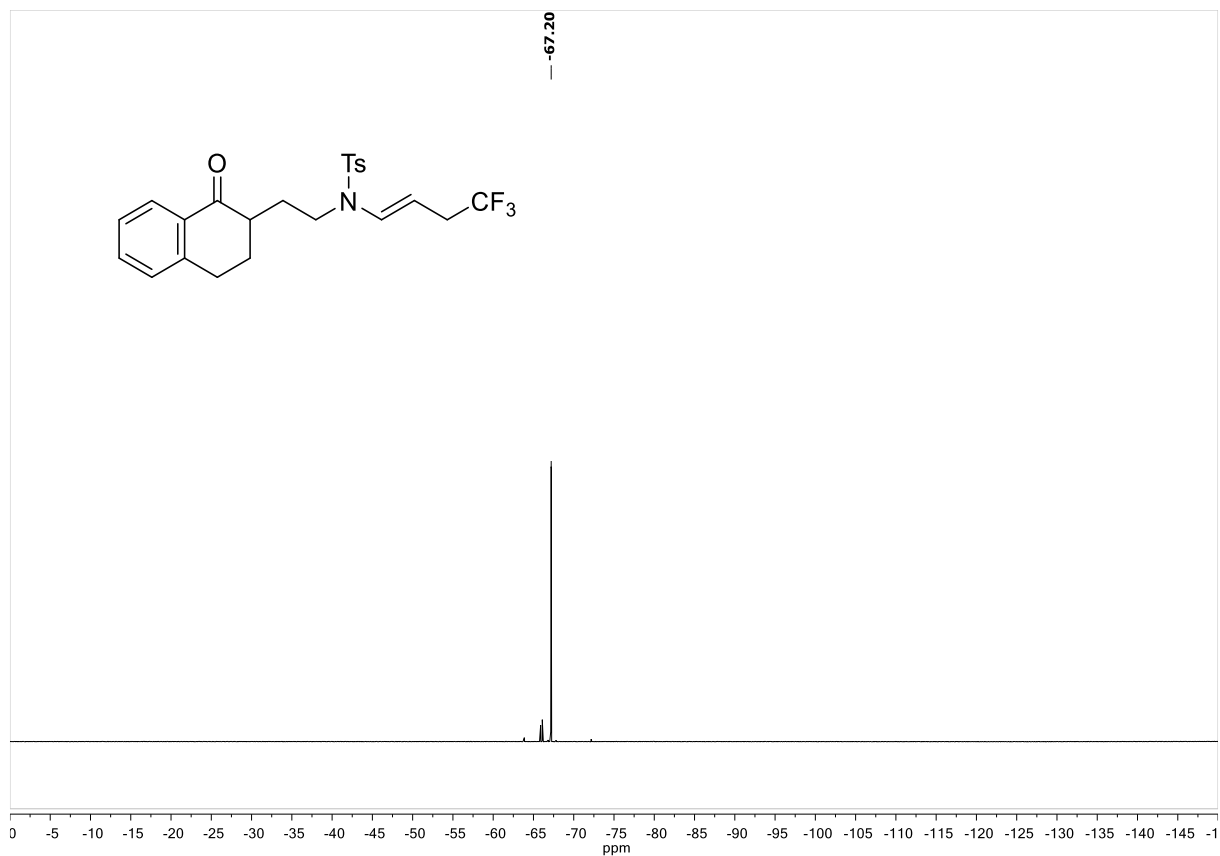

$^{19}\text{F}\{^1\text{H}\}$  NMR ( $\text{CDCl}_3$ , 282 MHz) of **3v**

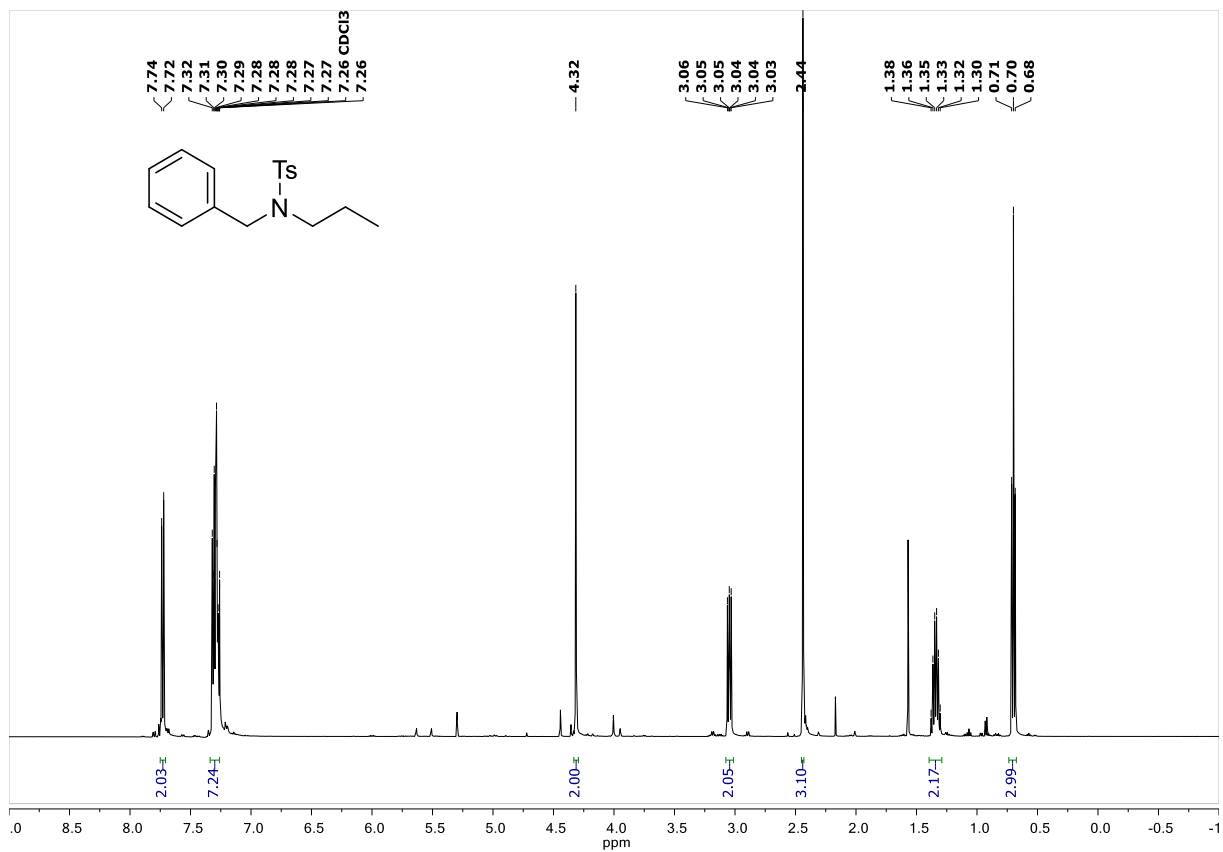

**<sup>1</sup>H NMR (CDCl<sub>3</sub>, 500 MHz) of 5**

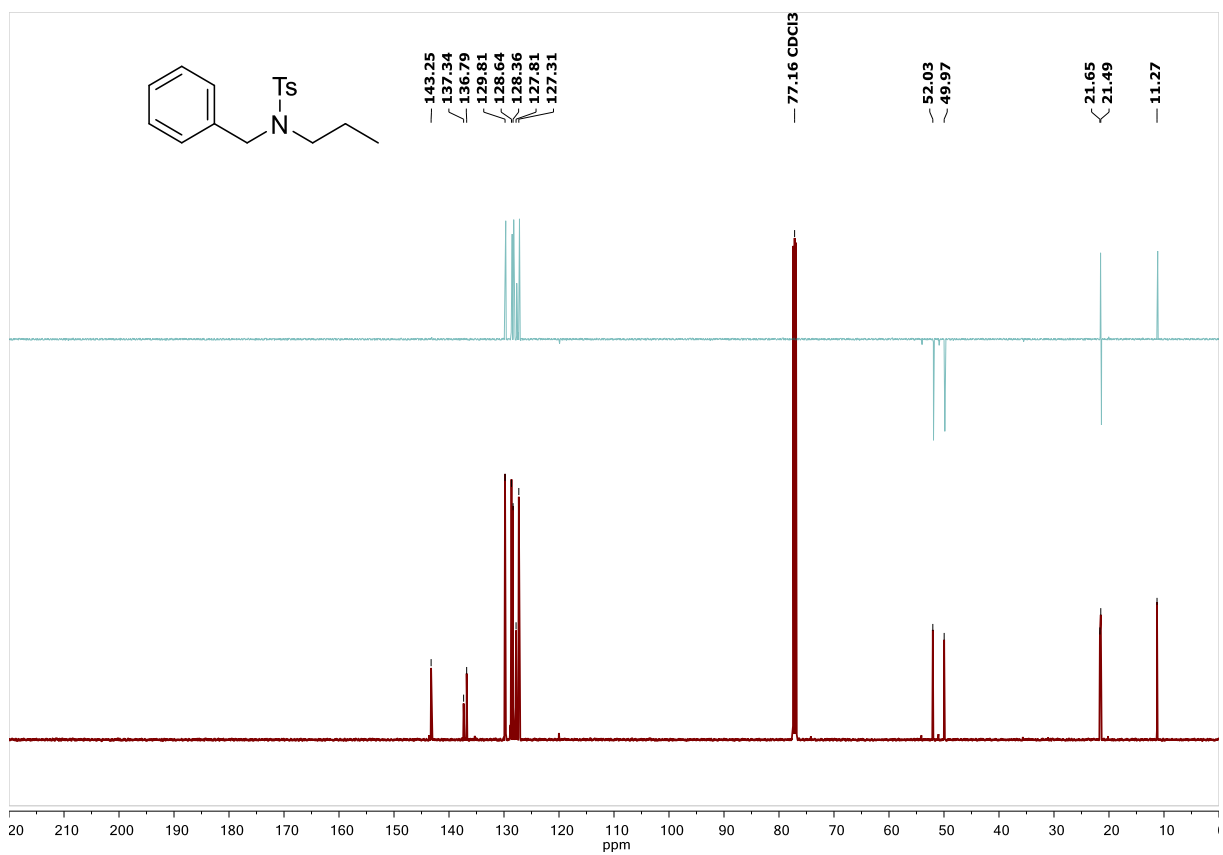

**<sup>13</sup>C{<sup>1</sup>H} NMR (CDCl<sub>3</sub>, 126 MHz) of 5**

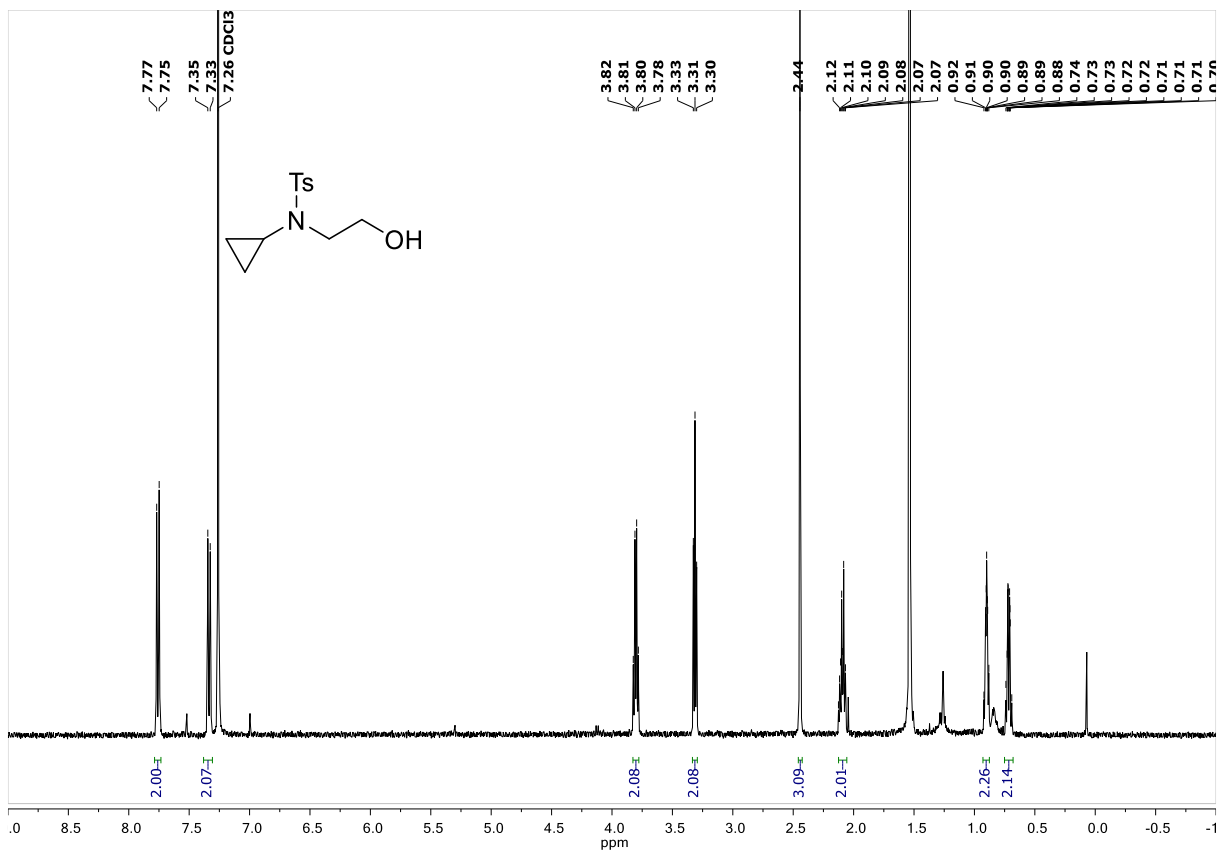

**<sup>1</sup>H NMR (CDCl<sub>3</sub>, 400 MHz) of 6**

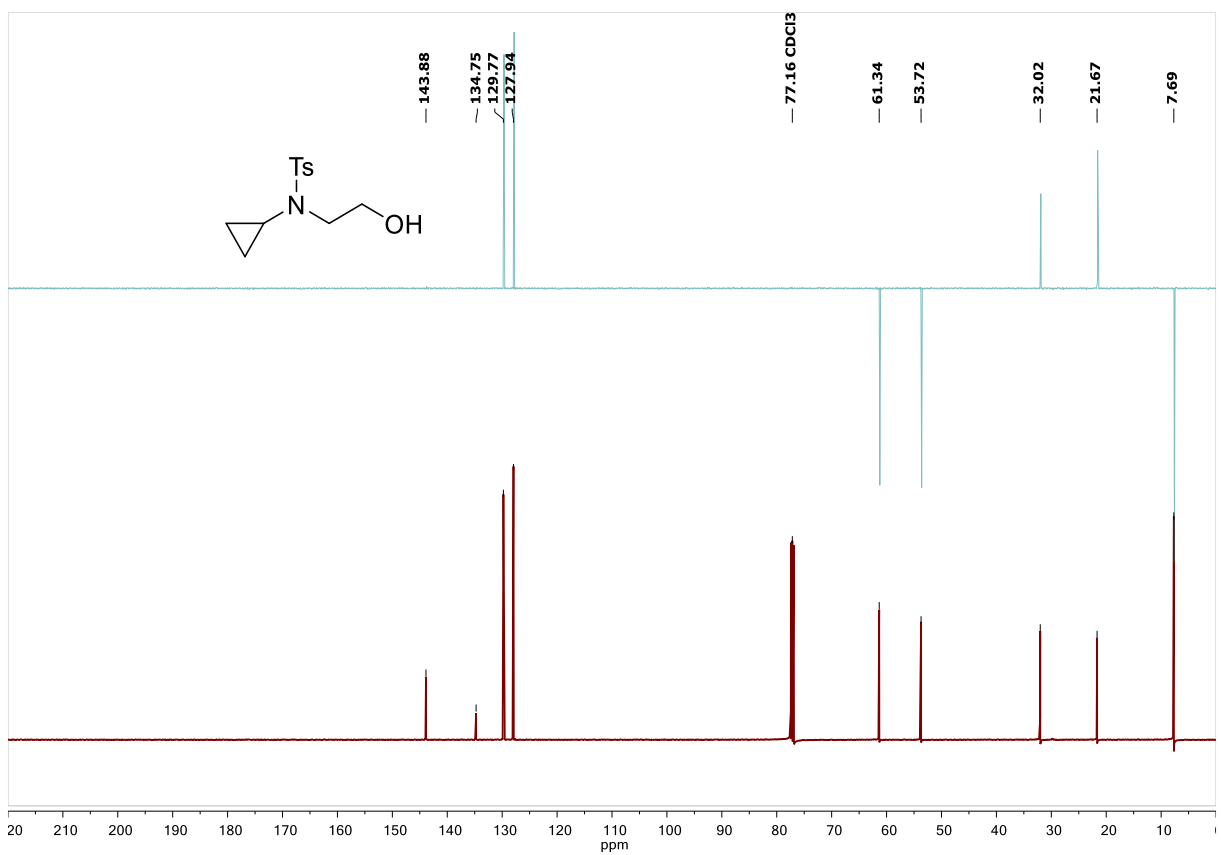

**<sup>13</sup>C NMR (CDCl<sub>3</sub>, 126 MHz) of 6**

## X-Ray Crystallography data

CCDC 2301994 (**3b**) contains the supplementary crystallographic data for this paper. These data can be obtained free of charge from the Cambridge crystallographic Data Centre.

Compound 4a was dissolved in a 0.5 mL dichloromethane, and *n*-hexane 2 mL were added. The sample was maintained at 4 °C for several days. Crystals were obtained through diffusion.

The X-ray diffraction data were collected at and 173 K on a Bruker SMART CCD diffractometer with MoK $\alpha$  radiation ( $\lambda = 0.71073 \text{ \AA}$ ). The diffraction data were corrected for absorption using the SADABS program. The structures were solved using SHELXS977 and refined by full matrix leastsquares on F2 using SHELXL-2014 in the anisotropic approximation for all non-hydrogen atoms. The hydrogen atoms were introduced at calculated positions and not refined (riding model).<sup>11</sup>

### Crystallography data of **3b**:

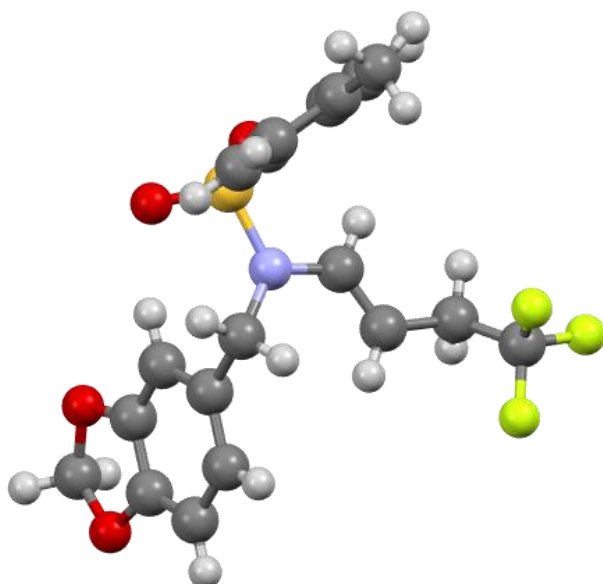

Structure of **3b** (CCDC 2301994): ellipsoid contour probability 50 %

<sup>11</sup> (a) Bruker. SADABS. Bruker AXS Inc.: Madison, Wisconsin, USA 2001. (b) M. Sheldrick, *Acta Crystallogr. Sect. A Found. Crystallogr.* 2008, **64**, 112–122. (c) G. M. Sheldrick, *Acta Crystallogr. Sect. C. Struct. Chem.* 2015, **71**, 3-8.

## Crystal structure Report for **3b** (CCDC 2301994)

Table 1. Crystal data and structure refinement for *elmcg\_b*.

|                                 |                                                                                                                           |
|---------------------------------|---------------------------------------------------------------------------------------------------------------------------|
| Identification code             | elmcg230419                                                                                                               |
| Empirical formula               | C <sub>19</sub> H <sub>18</sub> F <sub>3</sub> N O <sub>4</sub> S                                                         |
| Formula weight                  | 413.40                                                                                                                    |
| Temperature                     | 120(2) K                                                                                                                  |
| Wavelength                      | 0.71073 Å                                                                                                                 |
| Crystal system, space group     | Monoclinic, P 21/c                                                                                                        |
| Unit cell dimensions            | a = 9.9278(3) Å    alpha = 90 deg.<br>b = 16.1864(4) Å    beta = 110.3770(10) deg.<br>c = 12.2047(3) Å    gamma = 90 deg. |
| Volume                          | 1838.51(9) Å <sup>3</sup>                                                                                                 |
| Z, Calculated density           | 4, 1.494 Mg/m <sup>3</sup>                                                                                                |
| Absorption coefficient          | 0.232 mm <sup>-1</sup>                                                                                                    |
| F(000)                          | 856                                                                                                                       |
| Crystal size                    | 0.200 x 0.160 x 0.150 mm                                                                                                  |
| Theta range for data collection | 2.180 to 27.913 deg.                                                                                                      |
| Limiting indices                | -13 ≤ h ≤ 13, -21 ≤ k ≤ 19, -16 ≤ l ≤ 14                                                                                  |

Reflections collected / unique 29538 / 4381 [R(int) = 0.0245]

Completeness to theta = 25.242 99.9 %

Absorption correction Semi-empirical from equivalents

Max. and min. transmission 0.7456 and 0.6812

Refinement method Full-matrix least-squares on F<sup>2</sup>

Data / restraints / parameters 4381 / 0 / 254

Goodness-of-fit on F<sup>2</sup> 1.012

Final R indices [I > 2σ(I)] R1 = 0.0379, wR2 = 0.1034

R indices (all data) R1 = 0.0414, wR2 = 0.1070

Extinction coefficient n/a

Largest diff. peak and hole 0.728 and -0.668 e.Å<sup>-3</sup>

Table 2. Atomic coordinates ( $\times 10^4$ ) and equivalent isotropic displacement parameters ( $\text{\AA}^2 \times 10^3$ ) for elmcg\_b.

U(eq) is defined as one third of the trace of the orthogonalized Uij tensor.

---

|       | x        | y       | z       | U(eq) |
|-------|----------|---------|---------|-------|
| N(1)  | 4519(1)  | 8077(1) | 5912(1) | 20(1) |
| S(1)  | 3965(1)  | 8971(1) | 6252(1) | 19(1) |
| O(1)  | 3821(1)  | 8855(1) | 7371(1) | 25(1) |
| O(2)  | 4926(1)  | 9586(1) | 6105(1) | 26(1) |
| C(1)  | 2252(1)  | 9145(1) | 5209(1) | 19(1) |
| C(2)  | 1060(2)  | 8865(1) | 5450(1) | 23(1) |
| C(3)  | -294(2)  | 8938(1) | 4601(1) | 25(1) |
| C(4)  | -477(2)  | 9291(1) | 3521(1) | 25(1) |
| C(5)  | 735(2)   | 9589(1) | 3309(1) | 26(1) |
| C(6)  | 2099(2)  | 9519(1) | 4140(1) | 23(1) |
| C(7)  | -1958(2) | 9357(1) | 2612(2) | 37(1) |
| C(8)  | 5254(1)  | 8039(1) | 5055(1) | 21(1) |
| C(9)  | 6821(1)  | 7789(1) | 5614(1) | 19(1) |
| C(10) | 7424(2)  | 7214(1) | 5075(1) | 22(1) |
| C(11) | 8884(2)  | 6992(1) | 5553(1) | 24(1) |
| C(12) | 9670(1)  | 7362(1) | 6590(1) | 21(1) |
| O(3)  | 11122(1) | 7280(1) | 7225(1) | 26(1) |
| C(13) | 11349(2) | 7740(1) | 8281(1) | 29(1) |
| O(4)  | 10111(1) | 8247(1) | 8109(1) | 30(1) |
| C(14) | 9074(2)  | 7935(1) | 7127(1) | 21(1) |
| C(15) | 7660(2)  | 8168(1) | 6669(1) | 21(1) |
| C(16) | 4050(2)  | 7350(1) | 6300(1) | 21(1) |



|       |         |         |         |       |
|-------|---------|---------|---------|-------|
| C(17) | 4329(2) | 6580(1) | 6069(1) | 25(1) |
| C(18) | 3804(2) | 5871(1) | 6607(2) | 32(1) |
| C(19) | 2879(2) | 5282(1) | 5755(2) | 32(1) |
| F(1)  | 1707(1) | 5636(1) | 4997(1) | 64(1) |
| F(2)  | 2413(1) | 4661(1) | 6263(1) | 41(1) |
| F(3)  | 3589(2) | 4913(1) | 5127(1) | 59(1) |

---

Table 3. Selected bond lengths [Å] and angles [deg] for elmcg\_b.

---

---

Symmetry transformations used to generate equivalent atoms:

Table 4. Bond lengths [Å] and angles [deg] for elmcg\_b.

---

|             |            |
|-------------|------------|
| N(1)-C(16)  | 1.4064(18) |
| N(1)-C(8)   | 1.4701(18) |
| N(1)-S(1)   | 1.6529(12) |
| S(1)-O(2)   | 1.4323(11) |
| S(1)-O(1)   | 1.4339(11) |
| S(1)-C(1)   | 1.7559(14) |
| C(1)-C(2)   | 1.3910(19) |
| C(1)-C(6)   | 1.398(2)   |
| C(2)-C(3)   | 1.387(2)   |
| C(3)-C(4)   | 1.388(2)   |
| C(4)-C(5)   | 1.401(2)   |
| C(4)-C(7)   | 1.506(2)   |
| C(5)-C(6)   | 1.386(2)   |
| C(8)-C(9)   | 1.5197(18) |
| C(9)-C(10)  | 1.3888(19) |
| C(9)-C(15)  | 1.4078(19) |
| C(10)-C(11) | 1.408(2)   |
| C(11)-C(12) | 1.372(2)   |
| C(12)-C(14) | 1.383(2)   |
| C(12)-O(3)  | 1.3850(17) |
| O(3)-C(13)  | 1.436(2)   |
| C(13)-O(4)  | 1.4310(19) |
| O(4)-C(14)  | 1.3752(17) |
| C(14)-C(15) | 1.3710(19) |
| C(16)-C(17) | 1.328(2)   |
| C(17)-C(18) | 1.503(2)   |
| C(18)-C(19) | 1.473(2)   |
| C(19)-F(1)  | 1.337(2)   |
| C(19)-F(2)  | 1.3445(19) |

|                   |            |
|-------------------|------------|
| C(19)-F(3)        | 1.348(2)   |
| C(16)-N(1)-C(8)   | 120.67(12) |
| C(16)-N(1)-S(1)   | 118.00(10) |
| C(8)-N(1)-S(1)    | 120.39(10) |
| O(2)-S(1)-O(1)    | 120.11(7)  |
| O(2)-S(1)-N(1)    | 106.40(6)  |
| O(1)-S(1)-N(1)    | 106.05(6)  |
| O(2)-S(1)-C(1)    | 108.52(7)  |
| O(1)-S(1)-C(1)    | 108.61(7)  |
| N(1)-S(1)-C(1)    | 106.34(6)  |
| C(2)-C(1)-C(6)    | 121.00(13) |
| C(2)-C(1)-S(1)    | 118.35(11) |
| C(6)-C(1)-S(1)    | 120.58(11) |
| C(3)-C(2)-C(1)    | 119.21(14) |
| C(2)-C(3)-C(4)    | 121.13(14) |
| C(3)-C(4)-C(5)    | 118.67(13) |
| C(3)-C(4)-C(7)    | 119.99(15) |
| C(5)-C(4)-C(7)    | 121.33(15) |
| C(6)-C(5)-C(4)    | 121.33(14) |
| C(5)-C(6)-C(1)    | 118.62(13) |
| N(1)-C(8)-C(9)    | 112.06(11) |
| C(10)-C(9)-C(15)  | 120.66(13) |
| C(10)-C(9)-C(8)   | 120.55(13) |
| C(15)-C(9)-C(8)   | 118.76(12) |
| C(9)-C(10)-C(11)  | 121.76(13) |
| C(12)-C(11)-C(10) | 116.32(13) |
| C(11)-C(12)-C(14) | 122.04(13) |
| C(11)-C(12)-O(3)  | 128.44(14) |
| C(14)-C(12)-O(3)  | 109.43(13) |
| C(12)-O(3)-C(13)  | 105.06(11) |
| O(4)-C(13)-O(3)   | 107.94(12) |

|                   |            |
|-------------------|------------|
| C(14)-O(4)-C(13)  | 105.13(12) |
| C(15)-C(14)-O(4)  | 127.14(14) |
| C(15)-C(14)-C(12) | 122.55(13) |
| O(4)-C(14)-C(12)  | 110.22(12) |
| C(14)-C(15)-C(9)  | 116.65(13) |
| C(17)-C(16)-N(1)  | 126.48(13) |
| C(16)-C(17)-C(18) | 119.58(14) |
| C(19)-C(18)-C(17) | 114.34(14) |
| F(1)-C(19)-F(2)   | 106.47(14) |
| F(1)-C(19)-F(3)   | 107.37(16) |
| F(2)-C(19)-F(3)   | 105.21(14) |
| F(1)-C(19)-C(18)  | 112.89(15) |
| F(2)-C(19)-C(18)  | 112.87(14) |
| F(3)-C(19)-C(18)  | 111.53(15) |

---

Symmetry transformations used to generate equivalent atoms:

Table 5. Anisotropic displacement parameters ( $\text{\AA}^2 \times 10^3$ ) for elmcg\_b.

The anisotropic displacement factor exponent takes the form:

$$-2 \pi^2 [ h^2 a^{*2} U_{11} + \dots + 2 h k a^* b^* U_{12} ]$$

|       | U11   | U22   | U33   | U23   | U13   | U12   |
|-------|-------|-------|-------|-------|-------|-------|
| N(1)  | 15(1) | 19(1) | 27(1) | 1(1)  | 9(1)  | 1(1)  |
| S(1)  | 14(1) | 18(1) | 23(1) | -2(1) | 5(1)  | -2(1) |
| O(1)  | 23(1) | 28(1) | 23(1) | -2(1) | 7(1)  | 1(1)  |
| O(2)  | 19(1) | 23(1) | 36(1) | -2(1) | 7(1)  | -7(1) |
| C(1)  | 16(1) | 16(1) | 23(1) | -1(1) | 6(1)  | -1(1) |
| C(2)  | 19(1) | 21(1) | 28(1) | 2(1)  | 9(1)  | 0(1)  |
| C(3)  | 16(1) | 21(1) | 36(1) | -2(1) | 7(1)  | -1(1) |
| C(4)  | 20(1) | 22(1) | 28(1) | -7(1) | 2(1)  | 5(1)  |
| C(5)  | 28(1) | 28(1) | 23(1) | 1(1)  | 8(1)  | 6(1)  |
| C(6)  | 22(1) | 22(1) | 25(1) | 1(1)  | 11(1) | 1(1)  |
| C(7)  | 24(1) | 40(1) | 35(1) | -9(1) | -3(1) | 9(1)  |
| C(8)  | 16(1) | 26(1) | 21(1) | 1(1)  | 6(1)  | 0(1)  |
| C(9)  | 15(1) | 20(1) | 22(1) | 1(1)  | 7(1)  | -1(1) |
| C(10) | 20(1) | 22(1) | 25(1) | -4(1) | 9(1)  | -3(1) |
| C(11) | 22(1) | 21(1) | 34(1) | -2(1) | 14(1) | 1(1)  |
| C(12) | 14(1) | 21(1) | 30(1) | 6(1)  | 9(1)  | 1(1)  |
| O(3)  | 15(1) | 29(1) | 34(1) | 6(1)  | 7(1)  | 2(1)  |
| C(13) | 18(1) | 37(1) | 28(1) | 9(1)  | 4(1)  | 1(1)  |
| O(4)  | 17(1) | 40(1) | 27(1) | -5(1) | 0(1)  | 1(1)  |
| C(14) | 17(1) | 25(1) | 21(1) | 1(1)  | 6(1)  | -3(1) |
| C(15) | 17(1) | 24(1) | 23(1) | -3(1) | 8(1)  | 0(1)  |
| C(16) | 18(1) | 22(1) | 23(1) | 1(1)  | 7(1)  | -2(1) |
| C(17) | 23(1) | 23(1) | 28(1) | 2(1)  | 8(1)  | 0(1)  |

|       |       |       |       |        |        |        |
|-------|-------|-------|-------|--------|--------|--------|
| C(18) | 39(1) | 23(1) | 33(1) | 3(1)   | 11(1)  | -4(1)  |
| C(19) | 36(1) | 28(1) | 32(1) | 2(1)   | 10(1)  | -6(1)  |
| F(1)  | 38(1) | 54(1) | 73(1) | 24(1)  | -14(1) | -10(1) |
| F(2)  | 49(1) | 29(1) | 44(1) | 3(1)   | 14(1)  | -14(1) |
| F(3)  | 86(1) | 44(1) | 61(1) | -22(1) | 44(1)  | -17(1) |

---

Table 6. Hydrogen coordinates (  $\times 10^4$ ) and isotropic displacement parameters ( $\text{\AA}^2 \times 10^3$ ) for elmcg\_b.

---

|        | x     | y    | z    | U(eq) |
|--------|-------|------|------|-------|
| H(2)   | 1172  | 8627 | 6188 | 27    |
| H(3)   | -1109 | 8744 | 4760 | 30    |
| H(5)   | 618   | 9845 | 2581 | 32    |
| H(6)   | 2914  | 9721 | 3986 | 27    |
| H(7A)  | -2058 | 8954 | 1989 | 55    |
| H(7B)  | -2102 | 9915 | 2282 | 55    |
| H(7C)  | -2678 | 9244 | 2974 | 55    |
| H(8A)  | 5200  | 8587 | 4682 | 25    |
| H(8B)  | 4755  | 7636 | 4436 | 25    |
| H(10)  | 6835  | 6965 | 4366 | 27    |
| H(11)  | 9302  | 6607 | 5178 | 29    |
| H(13A) | 11485 | 7358 | 8944 | 34    |
| H(13B) | 12218 | 8089 | 8458 | 34    |
| H(15)  | 7265  | 8566 | 7045 | 26    |
| H(16)  | 3476  | 7417 | 6775 | 25    |
| H(17)  | 4858  | 6479 | 5566 | 30    |
| H(18A) | 4646  | 5570 | 7138 | 39    |
| H(18B) | 3262  | 6096 | 7085 | 39    |

---



Table 7. Selected torsion angles [deg] for elmcg\_b.

---

---

Symmetry transformations used to generate equivalent atoms:

Table 8. Torsion angles [deg] for elmcg\_b.

---

|                        |             |
|------------------------|-------------|
| C(16)-N(1)-S(1)-O(2)   | 161.56(10)  |
| C(8)-N(1)-S(1)-O(2)    | -29.42(12)  |
| C(16)-N(1)-S(1)-O(1)   | 32.60(12)   |
| C(8)-N(1)-S(1)-O(1)    | -158.38(10) |
| C(16)-N(1)-S(1)-C(1)   | -82.89(11)  |
| C(8)-N(1)-S(1)-C(1)    | 86.13(11)   |
| O(2)-S(1)-C(1)-C(2)    | -154.78(11) |
| O(1)-S(1)-C(1)-C(2)    | -22.63(13)  |
| N(1)-S(1)-C(1)-C(2)    | 91.12(12)   |
| O(2)-S(1)-C(1)-C(6)    | 28.30(14)   |
| O(1)-S(1)-C(1)-C(6)    | 160.45(11)  |
| N(1)-S(1)-C(1)-C(6)    | -85.80(12)  |
| C(6)-C(1)-C(2)-C(3)    | 1.9(2)      |
| S(1)-C(1)-C(2)-C(3)    | -175.00(11) |
| C(1)-C(2)-C(3)-C(4)    | -0.5(2)     |
| C(2)-C(3)-C(4)-C(5)    | -1.2(2)     |
| C(2)-C(3)-C(4)-C(7)    | 179.57(14)  |
| C(3)-C(4)-C(5)-C(6)    | 1.6(2)      |
| C(7)-C(4)-C(5)-C(6)    | -179.18(14) |
| C(4)-C(5)-C(6)-C(1)    | -0.3(2)     |
| C(2)-C(1)-C(6)-C(5)    | -1.5(2)     |
| S(1)-C(1)-C(6)-C(5)    | 175.33(11)  |
| C(16)-N(1)-C(8)-C(9)   | -78.52(16)  |
| S(1)-N(1)-C(8)-C(9)    | 112.76(12)  |
| N(1)-C(8)-C(9)-C(10)   | 136.17(14)  |
| N(1)-C(8)-C(9)-C(15)   | -45.73(17)  |
| C(15)-C(9)-C(10)-C(11) | -0.3(2)     |
| C(8)-C(9)-C(10)-C(11)  | 177.79(13)  |
| C(9)-C(10)-C(11)-C(12) | 1.2(2)      |

|                         |             |
|-------------------------|-------------|
| C(10)-C(11)-C(12)-C(14) | -1.4(2)     |
| C(10)-C(11)-C(12)-O(3)  | -177.51(13) |
| C(11)-C(12)-O(3)-C(13)  | -174.94(15) |
| C(14)-C(12)-O(3)-C(13)  | 8.54(15)    |
| C(12)-O(3)-C(13)-O(4)   | -14.37(15)  |
| O(3)-C(13)-O(4)-C(14)   | 14.73(15)   |
| C(13)-O(4)-C(14)-C(15)  | 173.86(15)  |
| C(13)-O(4)-C(14)-C(12)  | -9.54(16)   |
| C(11)-C(12)-C(14)-C(15) | 0.6(2)      |
| O(3)-C(12)-C(14)-C(15)  | 177.40(13)  |
| C(11)-C(12)-C(14)-O(4)  | -176.16(13) |
| O(3)-C(12)-C(14)-O(4)   | 0.62(16)    |
| O(4)-C(14)-C(15)-C(9)   | 176.59(13)  |
| C(12)-C(14)-C(15)-C(9)  | 0.4(2)      |
| C(10)-C(9)-C(15)-C(14)  | -0.5(2)     |
| C(8)-C(9)-C(15)-C(14)   | -178.63(13) |
| C(8)-N(1)-C(16)-C(17)   | 7.8(2)      |
| S(1)-N(1)-C(16)-C(17)   | 176.77(12)  |
| N(1)-C(16)-C(17)-C(18)  | 176.88(14)  |
| C(16)-C(17)-C(18)-C(19) | 122.82(17)  |
| C(17)-C(18)-C(19)-F(1)  | -58.5(2)    |
| C(17)-C(18)-C(19)-F(2)  | -179.27(14) |
| C(17)-C(18)-C(19)-F(3)  | 62.5(2)     |

---

Symmetry transformations used to generate equivalent atoms:

Table 9. Hydrogen bonds for elmcg\_b [A and deg.].

---

D-H...A            d(D-H)   d(H...A)   d(D...A)   <(DHA)
